# Supplementary material
Source: MDPI journal article supplement (https://www.mdpi.com/2073-4433/12/1/122)
Supplement: s1 [file s1]

Archive with 4 entries (2 files):
- atmosphere-1026766-SI/
- atmosphere-1026766-SI/sup/
- atmosphere-1026766-SI/sup/Supplementary Material_figure_S1.pdf
- atmosphere-1026766-SI/sup/Supplement_Rawdata.xlsx
