# Supplementary material
Source: MDPI journal article supplement (https://www.mdpi.com/2073-4433/12/1/122)
Supplement: s1 [file s1 › atmosphere-1026766-SI/sup/Supplement_Rawdata.xlsx]

## Sheet: DMS_obs
Observation
Correced UTC	Lon [WE]	Lat [SN]	DMS [nM] ; avg
2018-03-28 06:00:03	176.145	-46.7375
2018-03-29 00:00:03	179.254	-49.7756
2018-03-29 06:00:03	-179.672	-50.779
2018-03-29 18:00:03	-177.483	-52.7597
2018-03-30 00:00:03	-176.404	-53.7107
2018-03-30 06:00:03	-175.309	-54.65
2018-03-30 12:00:03	-173.924	-55.5308
2018-03-30 18:00:03	-172.456	-56.4306
2018-03-31 00:00:03	-170.9	-57.3568
2018-03-31 06:00:03	-169.33	-58.2742	5.22092
2018-04-01 12:00:03	-159.978	-62.3871
2018-04-01 18:00:03	-157.868	-63.1801
2018-04-02 00:00:03	-155.675	-63.9342
2018-04-02 06:00:04	-153.173	-64.5162	0.975912
2018-04-02 12:00:04	-150.641	-65.1231
2018-04-03 00:00:04	-145.499	-66.2079
2018-04-03 06:00:04	-142.925	-66.7713
2018-04-03 12:00:04	-140.093	-67.1644	5.15618
2018-04-03 18:00:04	-137.087	-67.4431	7.65368
2018-04-04 00:00:04	-133.949	-67.7318
2018-04-04 06:00:04	-130.815	-68.0173	5.52064
2018-04-04 12:00:04	-127.602	-68.294
2018-04-05 18:00:04	-110.657	-68.3383	14.5264
2018-04-06 00:00:04	-107.304	-68.2503	4.06392
2018-04-06 06:00:04	-104.242	-68.151	3.26094
2018-04-06 18:00:04	-97.4295	-67.9236	17.2386
2018-04-07 00:00:04	-94.0462	-67.8148
2018-04-07 06:00:04	-90.6264	-67.6916
2018-04-07 18:00:04	-83.9906	-67.481	1.7309
2018-04-08 00:00:04	-80.6816	-67.3672	0.0948447
2018-04-08 06:00:04	-77.6418	-67.0484	0.602245
2018-04-08 12:00:04	-74.8116	-66.6396
2018-04-08 18:00:04	-72.1352	-66.2589
2018-04-10 00:00:04	-63.7781	-64.1792	2.70362
2018-04-10 06:00:04	-62.5776	-63.7948	2.67935
2018-04-10 12:00:04	-61.2721	-63.3853	4.08565
2018-04-10 18:00:04	-60.7418	-62.9913
2018-04-11 00:00:04	-60.4248	-63.121	4.96169
2018-04-11 18:00:04	-58.2441	-62.828
2018-04-12 00:00:04	-57.8538	-63.0432	1.12772
2018-04-12 06:00:04	-57.8541	-63.0434	8.26538
2018-04-12 18:00:04	-58.7142	-62.576
2018-04-13 00:00:04	-58.9336	-62.2022	4.9274
2018-04-14 06:00:04	-56.227	-62.0356	0.26591
2018-04-14 12:00:04	-55.8554	-62.3196	6.88913
2018-04-14 18:00:04	-55.1409	-63.1424	5.24755
2018-04-15 00:00:04	-55.3315	-63.1257
2018-04-15 06:00:04	-55.3314	-63.1256	0.315817
2018-04-15 12:00:04	-55.3316	-63.1258
2018-04-16 06:00:04	-53.2946	-64.1602	1.45239
2018-04-16 12:00:04	-53.8476	-63.7576
2018-04-16 18:00:04	-55.1419	-62.7811	1.88965
2018-04-17 00:00:04	-56.1315	-62.1253	1.11812
2018-04-17 06:00:04	-56.1315	-62.1252	2.75335
2018-04-18 18:00:04	-55.7857	-64.0061	1.58875
2018-04-19 06:00:04	-55.7251	-64.1649	1.12979
2018-04-19 18:00:04	-55.6842	-64.2884
2018-04-20 00:00:04	-56.6596	-64.4432	0.704404
2018-04-20 06:00:04	-56.4744	-64.1767	0.944903
2018-04-21 00:00:04	-58.2078	-63.8411	1.87521
2018-04-21 06:00:04	-58.5435	-64.148	0.323386
2018-04-22 18:00:04	-55.3422	-63.1393	1.0583
2018-04-23 00:00:04	-55.331	-63.1485
2018-04-23 06:00:04	-55.3205	-63.1477	1.50962
2018-04-23 12:00:04	-55.3199	-63.1476	0.247457
2018-04-23 18:00:04	-55.3225	-63.1463
2018-04-24 06:00:04	-53.9658	-63.3224	0.595115
2018-04-24 12:00:04	-53.7891	-63.3146	3.04348
2018-04-24 18:00:04	-53.7561	-63.2593	1.84598
2018-04-25 00:00:04	-53.5425	-63.008	1.69245
2018-04-25 06:00:04	-56.489	-62.8911	1.15068
2018-04-25 12:00:04	-57.9607	-63.0397	2.49998
2018-04-25 18:00:04	-57.9554	-63.3448
2018-04-26 00:00:04	-58.1753	-62.922	1.3194
2018-04-26 06:00:04	-58.1923	-62.8421	1.41689
2018-04-26 12:00:04	-58.5999	-62.48	0.758062
2018-04-26 18:00:04	-58.6305	-62.4907	1.60797
2018-04-27 00:00:04	-58.6776	-62.4813
2018-04-27 06:00:04	-58.7373	-62.285
2018-04-27 12:00:04	-58.7523	-62.285	1.75351
2018-04-28 12:00:04	-58.8151	-62.253
2018-04-28 18:00:04	-58.8014	-62.2627	2.58238
2018-04-29 00:00:04	-58.885	-62.2497
2018-04-29 06:00:04	-58.835	-62.1985	4.0223
2018-04-29 12:00:04	-58.8353	-62.1813
2018-04-29 18:00:04	-58.8359	-62.183	0.656663
2018-04-30 00:00:04	-58.8362	-62.2416	4.55754
2018-04-30 06:00:04	-58.8156	-62.2201	0.949855
2018-04-30 12:00:04	-58.8253	-62.2184	3.24466
2018-04-30 18:00:04	-58.8254	-62.2184	5.50757

## Sheet: DMS_clim
date	time	Lon [WE]	Lat [SN]	DMS_L11 (nM)	DMS_G18 (nM)	DMS_W20 (nM)
2018-03-27	00:00:00	172.849	-43.5888
2018-03-27	06:00:00	173.961	-44.5004	1.8529	3.48828	5.45844
2018-03-27	12:00:00	174.998	-45.576	1.6472	2.39368	5.31218
2018-03-27	18:00:00	176.009	-46.6048	1.5182	1.93953	5.01533
2018-03-28	00:00:00	176.47	-47.068	1.4924	1.68749	4.12519
2018-03-28	06:00:00	177.508	-48.0946	1.5049	1.43274	3.58169
2018-03-28	12:00:00	178.556	-49.1085	1.5289	1.25426	3.24606
2018-03-28	18:00:00	179.611	-50.1109	1.5617	1.15754	2.41433
2018-03-29	00:00:00	-179.312	-51.1114	1.5984	1.06473	2.43634
2018-03-29	06:00:00	-178.241	-52.089	1.6331	1.06735	2.00771
2018-03-29	12:00:00	-177.114	-53.0935	1.6616	1.02012	2.063
2018-03-29	18:00:00	-176.048	-54.0183	1.6824	0.911803	1.71037
2018-03-30	00:00:00	-174.857	-54.9481	1.7003	0.918023	1.65307
2018-03-30	06:00:00	-173.442	-55.8271	1.7046	0.827847	1.5713
2018-03-30	12:00:00	-171.941	-56.7383	1.7036	0.745688	1.61493
2018-03-30	18:00:00	-170.372	-57.6682	1.6942	0.705752	1.55207
2018-03-31	00:00:00	-168.804	-58.5762	1.6801	0.664213	1.45729
2018-03-31	06:00:00	-167.148	-59.5066	1.6638	0.595163	1.4483
2018-03-31	12:00:00	-165.237	-60.3195	1.6469	0.532718	1.53666
2018-03-31	18:00:00	-163.302	-61.0972	1.6297	0.48608	1.49988
2018-04-01	00:00:00	-161.355	-61.8564	1.0162	0.327673	0.678524
2018-04-01	06:00:00	-159.283	-62.6508	1.0486	0.388869	0.65168
2018-04-01	12:00:00	-157.153	-63.4421	1.0803	0.370301	0.654697
2018-04-01	18:00:00	-154.845	-64.1283	1.076	0.260318	0.644451
2018-04-02	00:00:00	-152.327	-64.7095	1.0405	0.25493	0.656129
2018-04-02	06:00:00	-149.757	-65.2902	0.99878		0.630037
2018-04-02	12:00:00	-147.217	-65.85	0.95777	0.249343	0.653209
2018-04-02	18:00:00	-144.644	-66.3956	0.93388		0.625677
2018-04-03	00:00:00	-142.018	-66.9348	0.90171		0.614191
2018-04-03	06:00:00	-139.098	-67.2568	0.91286		0.601025
2018-04-03	12:00:00	-136.055	-67.5395	0.86233		0.577838
2018-04-03	18:00:00	-132.902	-67.8273	0.80816		0.603043
2018-04-04	00:00:00	-129.761	-68.0995	0.87795		0.592229
2018-04-04	06:00:00	-126.513	-68.4015	0.88637		0.601612
2018-04-04	12:00:00	-123.24	-68.5868	0.96004		0.610637
2018-04-04	18:00:00	-119.835	-68.5898	1.1041		0.605746
2018-04-05	00:00:00	-116.396	-68.5434	1.204		0.612149
2018-04-05	06:00:00	-112.971	-68.4216	1.2571		0.63865
2018-04-05	12:00:00	-109.499	-68.3177	1.2536		0.674959
2018-04-05	18:00:00	-106.55	-68.227	1.2373		0.645387
2018-04-06	00:00:00	-103.074	-68.1123	1.2238		0.625861
2018-04-06	06:00:00	-99.6762	-68.0052	1.2285		0.610059
2018-04-06	12:00:00	-96.2959	-67.8895	1.2315		0.622446
2018-04-06	18:00:00	-92.8958	-67.7765	1.284		0.605566
2018-04-07	00:00:00	-89.5072	-67.6645	1.3127		0.59982
2018-04-07	06:00:00	-86.2349	-67.5535	1.3294		0.631518
2018-04-07	12:00:00	-82.8607	-67.4412	1.3432		0.63028
2018-04-07	18:00:00	-79.6565	-67.301	1.3919		0.638955
2018-04-08	00:00:00	-76.6817	-66.8941	1.4644		0.674962
2018-04-08	06:00:00	-73.9014	-66.5152	1.638		0.69864
2018-04-08	12:00:00	-71.3017	-66.1367	1.7506		0.699439
2018-04-08	18:00:00	-68.9354	-65.7876	1.8884	0.332507	0.84284
2018-04-09	00:00:00	-66.6898	-65.4504	1.9987	0.566818	0.928384
2018-04-09	06:00:00	-65.5914	-65.0358	2.0556	0.356891	0.940098
2018-04-09	12:00:00	-64.5067	-64.527	2.073	0.446024	0.908018
2018-04-09	18:00:00	-63.3998	-64.0482		0.515536	0.923583
2018-04-10	00:00:00	-62.1549	-63.6628	2.1095	0.404924	0.855656
2018-04-10	06:00:00	-60.8013	-63.2397	2.2112	0.344356	0.842891
2018-04-10	12:00:00	-60.74	-62.993	2.1175	0.495769	0.837648
2018-04-10	18:00:00	-60.3287	-63.1768	2.2112	0.344356	0.842891
2018-04-11	00:00:00	-58.9862	-62.7684	2.1912	0.389641	0.853915
2018-04-11	06:00:00	-58.4724	-62.7549	2.1912	0.389641	0.853915
2018-04-11	12:00:00	-58.1163	-62.8841	2.1912	0.389641	0.853915
2018-04-11	18:00:00	-57.8538	-63.0433	2.3321	0.360701	0.828365
2018-04-12	00:00:00	-57.854	-63.0434	2.3321	0.360701	0.828365
2018-04-12	06:00:00	-58.7163	-62.6869	2.1912	0.389641	0.853915
2018-04-12	12:00:00	-58.8455	-62.2197	2.1912	0.389641	0.853915
2018-04-12	18:00:00	-58.9336	-62.2022	2.1912	0.389641	0.853915
2018-04-13	00:00:00	-58.9337	-62.2022	2.1912	0.389641	0.853915
2018-04-13	06:00:00	-58.8477	-62.202	2.1912	0.389641	0.853915
2018-04-13	12:00:00	-57.1361	-62.1915	2.2271	0.383432	0.837526
2018-04-13	18:00:00	-56.1486	-61.989	2.1195	0.437379	0.889463
2018-04-14	00:00:00	-56.2274	-62.0357	2.2528	0.385043	0.847812
2018-04-14	06:00:00	-55.4066	-62.66	2.2536	0.39227	0.817262
2018-04-14	12:00:00	-55.3748	-63.1024	2.3496	0.424345	0.848376
2018-04-14	18:00:00	-55.3311	-63.1256	2.3496	0.424345	0.848376
2018-04-15	00:00:00	-55.3316	-63.1258	2.3496	0.424345	0.848376
2018-04-15	06:00:00	-55.3316	-63.1258	2.3496	0.424345	0.848376
2018-04-15	12:00:00	-54.1887	-63.4458	2.3124	0.379978	0.768777
2018-04-15	18:00:00	-53.3819	-64.3234	2.2974	0.282487	0.767969
2018-04-16	00:00:00	-53.2945	-64.1603	2.2974	0.282487	0.767969
2018-04-16	06:00:00	-54.2667	-63.4204	2.3124	0.379978	0.768777
2018-04-16	12:00:00	-55.6013	-62.498	2.2536	0.39227	0.817262
2018-04-16	18:00:00	-56.1315	-62.1253	2.2528	0.385043	0.847812
2018-04-17	00:00:00	-56.1315	-62.1252	2.2528	0.385043	0.847812
2018-04-17	06:00:00	-56.1314	-62.1251	2.2528	0.385043	0.847812
2018-04-17	12:00:00	-56.1311	-62.125	2.2528	0.385043	0.847812
2018-04-17	18:00:00	-56.131	-62.1249	2.2528	0.385043	0.847812
2018-04-18	00:00:00	-56.131	-62.1249	2.2528	0.385043	0.847812
2018-04-18	06:00:00	-56.8588	-63.2539	2.3528	0.38839	0.858075
2018-04-18	12:00:00	-55.8145	-64.1566	2.4026	0.382622	0.890717
2018-04-18	18:00:00	-55.7567	-64.1492	2.4026	0.382622	0.890717
2018-04-19	00:00:00	-55.7232	-64.171	2.4026	0.382622	0.890717
2018-04-19	06:00:00	-55.7225	-64.2468	2.4026	0.382622	0.890717
2018-04-19	12:00:00	-55.9506	-64.3128	2.4026	0.382622	0.890717
2018-04-19	18:00:00	-56.6739	-64.4205	2.41	0.428386	1.13548
2018-04-20	00:00:00	-56.4744	-64.1767	2.41	0.428386	1.13548
2018-04-20	06:00:00	-56.4749	-64.1766	2.41	0.428386	1.13548
2018-04-20	12:00:00	-56.7592	-63.9983	2.3528	0.38839	0.858075
2018-04-20	18:00:00	-58.5367	-64.1314			0.784173
2018-04-21	00:00:00	-58.5438	-64.1495			0.784173
2018-04-21	06:00:00	-58.5403	-64.1577			0.784173
2018-04-21	12:00:00	-58.5528	-64.1693			0.784173
2018-04-21	18:00:00	-56.8657	-63.7377	2.3528	0.38839	0.858075
2018-04-22	00:00:00	-55.0761	-63.8088	2.3496	0.424345	0.848376
2018-04-22	06:00:00	-54.5436	-63.5892	2.3124	0.379978	0.768777
2018-04-22	12:00:00	-55.3169	-63.1529	2.3496	0.424345	0.848376
2018-04-22	18:00:00	-55.3387	-63.1445	2.3496	0.424345	0.848376
2018-04-23	00:00:00	-55.3197	-63.1478	2.3496	0.424345	0.848376
2018-04-23	06:00:00	-55.3194	-63.1476	2.3496	0.424345	0.848376
2018-04-23	12:00:00	-55.3251	-63.1455	2.3496	0.424345	0.848376
2018-04-23	18:00:00	-54.3878	-63.3081	2.3124	0.379978	0.768777
2018-04-24	00:00:00	-53.8864	-63.3193	2.2527	0.338134	0.78593
2018-04-24	06:00:00	-53.6823	-63.3099	2.2527	0.338134	0.78593
2018-04-24	12:00:00	-53.756	-63.2594	2.2527	0.338134	0.78593
2018-04-24	18:00:00	-54.4497	-62.9748	2.2199	0.41313	0.787962
2018-04-25	00:00:00	-57.5574	-62.8547	2.2271	0.383432	0.837526
2018-04-25	06:00:00	-58.0192	-63.2747		0.361525	0.865753
2018-04-25	12:00:00	-57.9447	-63.3543	2.3321	0.360701	0.828365
2018-04-25	18:00:00	-58.2	-62.84	2.1912	0.389641	0.853915
2018-04-26	00:00:00	-58.4001	-62.6599	2.1912	0.389641	0.853915
2018-04-26	06:00:00	-58.6003	-62.48	2.1912	0.389641	0.853915
2018-04-26	12:00:00	-58.6615	-62.4955	2.1912	0.389641	0.853915
2018-04-26	18:00:00	-58.76	-62.29	2.1912	0.389641	0.853915
2018-04-27	00:00:00	-58.7394	-62.2815	2.1912	0.389641	0.853915
2018-04-27	06:00:00	-58.7898	-62.2198	2.1912	0.389641	0.853915
2018-04-27	12:00:00	-58.789	-62.2199	2.1912	0.389641	0.853915
2018-04-27	18:00:00	-58.7891	-62.2199	2.1912	0.389641	0.853915
2018-04-28	00:00:00	-58.7781	-62.269	2.1912	0.389641	0.853915
2018-04-28	06:00:00	-58.8124	-62.2517	2.1912	0.389641	0.853915
2018-04-28	12:00:00	-58.8168	-62.2538	2.1912	0.389641	0.853915
2018-04-28	18:00:00	-58.8897	-62.2124	2.1912	0.389641	0.853915
2018-04-29	00:00:00	-58.836	-62.1834	2.1912	0.389641	0.853915
2018-04-29	06:00:00	-58.836	-62.183	2.1912	0.389641	0.853915
2018-04-29	12:00:00	-58.8341	-62.1818	2.1912	0.389641	0.853915
2018-04-29	18:00:00	-58.84	-62.23	2.1912	0.389641	0.853915
2018-04-30	00:00:00	-58.8253	-62.2183	2.1912	0.389641	0.853915
2018-04-30	06:00:00	-58.8254	-62.2184	2.1912	0.389641	0.853915
2018-04-30	12:00:00	-58.7989	-62.2188	2.1912	0.389641	0.853915
2018-04-30	18:00:00	-58.774	-62.2141	2.1912	0.389641	0.853915
2018-05-01	00:00:00	-58.774	-62.214	1.4419		0.582154
2018-05-01	06:00:00	-58.7741	-62.214	1.4419		0.582154
2018-05-01	12:00:00	-58.7382	-62.205	1.4419		0.582154
2018-05-01	18:00:00	-58.7887	-62.2195	1.4419		0.582154
2018-05-02	00:00:00	-57.3941	-62.0072	1.461		0.543692
2018-05-02	06:00:00	-58.396	-60.9035	1.3312		0.674089
2018-05-02	12:00:00	-59.5836	-59.9018	1.2652		0.763075
2018-05-02	18:00:00	-60.7889	-58.8462	1.2144		0.858575
2018-05-03	00:00:00	-61.9	-57.8462	1.173		0.960837
2018-05-03	06:00:00	-63.0855	-56.7481	1.1467		1.0014
2018-05-03	12:00:00	-64.3106	-55.5754	1.14		0.967368
2018-05-03	18:00:00	-65.1374	-54.5095	1.1449	0.899718	1.21397
2018-05-04	00:00:00	-66.0284	-53.9679	1.1638	0.886682	1.47262
2018-05-04	06:00:00	-66.6514	-53.604	1.1638	0.886682	1.47262
2018-05-04	12:00:00	-67.4737	-53.1224	1.1904	1.21575	1.62196
2018-05-04	18:00:00	-68.1725	-52.709	1.2243	1.1986	1.74535
2018-05-05	00:00:00	-68.687	-52.4592	1.2243	1.1986	1.74535

## Sheet: Other
	DMS [nM] ; avg	Lon [WE]	Lat [SN]	[VTG] SOG (knots)	DO2/Ar [%] ; MIMS, 10 min avg	Sea Ice Concentration [%]	SSS	SST SBE38-2	SST SBE45	SST SBE38-1	Temp Optode, Measured	O2 [uM] Optode, Measured	O2 [uM] Optode, Compensated	Tws(m/s)	flag_sst	U10(m/s)	Sc_W14	K(cm/hr)_N00	K(cm/hr)_W14	fraction	flux(umol/m2/day)_N00	flux(umol/m2/day)_W14
27/03/2018 00:00	nan	172.849	-43.5888	8.049	nan	nan	33.6195	17.6351	18.5908	28.2064	nan	nan	nan	nan	5	nan	1007.21	nan	nan	nan	nan	nan
27/03/2018 00:10	nan	172.888	-43.5893	11.225	nan	nan	33.7605	17.3362	18.4087	28.2259	nan	nan	nan	13.16	5	11.8982	1016.24	27.1933	28.6361	nan	nan	nan
27/03/2018 00:20	nan	172.929	-43.5972	11.288	nan	nan	33.8245	17.2389	17.5257	28.2362	nan	nan	nan	14.06	5	12.7119	1061.5	30.1533	31.9824	nan	nan	nan
27/03/2018 00:30	nan	172.971	-43.6053	11.325	nan	nan	33.8118	17.1474	17.3695	28.2315	nan	nan	nan	14.23	5	12.8656	1069.77	30.7285	32.6335	nan	nan	nan
27/03/2018 00:40	nan	173.013	-43.6161	11.67	nan	nan	33.8329	17.1801	17.3007	28.206	nan	nan	nan	13.31	5	12.0339	1073.43	27.0313	28.5015	nan	nan	nan
27/03/2018 00:50	nan	173.053	-43.6302	11.898	nan	nan	33.7878	17.242	17.4318	28.1648	nan	nan	nan	12.86	5	11.627	1066.45	25.415	26.6938	nan	nan	nan
27/03/2018 01:00	nan	173.095	-43.6437	12.001	nan	nan	33.7695	17.2805	17.55	28.1299	nan	nan	nan	11.25	5	10.1714	1060.22	19.8259	20.4883	nan	nan	nan
27/03/2018 01:10	nan	173.136	-43.6571	11.734	nan	nan	33.7633	17.2781	17.5928	28.1013	nan	nan	nan	8.91	0	8.05572	1057.97	12.8695	12.8652	nan	nan	nan
27/03/2018 01:20	nan	173.173	-43.6742	11.982	nan	nan	33.7561	17.2977	17.5676	28.0792	nan	nan	nan	10.1	0	9.13162	1059.29	16.2207	16.5209	nan	nan	nan
27/03/2018 01:30	nan	173.199	-43.7022	12.52	nan	nan	33.7423	17.282	17.593	28.0588	nan	nan	nan	11.08	0	10.0177	1057.95	19.2897	19.895	nan	nan	nan
27/03/2018 01:40	nan	173.227	-43.7307	12.592	nan	nan	33.7201	17.275	17.562	28.0445	nan	nan	nan	6.92	0	6.25652	1059.58	8.10702	7.75433	nan	nan	nan
27/03/2018 01:50	nan	173.254	-43.7589	12.497	nan	nan	33.7173	17.256	17.703	28.0225	17.5183	274.142	223.81	6.62	0	5.98528	1052.21	7.51054	7.12139	nan	nan	nan
27/03/2018 02:00	nan	173.281	-43.7869	12.377	nan	nan	33.7574	17.2488	17.7573	28.0078	17.5526	274.626	224.163	7.7	0	6.96173	1049.38	9.88871	9.6475	nan	nan	nan
27/03/2018 02:10	nan	173.308	-43.8151	12.354	nan	nan	33.7361	17.2297	17.7593	27.9941	17.5472	276.472	225.697	5.58	0	5.045	1049.28	5.54311	5.06667	nan	nan	nan
27/03/2018 02:20	nan	173.335	-43.8437	12.567	nan	nan	33.752	17.193	17.7274	27.9794	17.539	280.105	228.638	5.33	0	4.81897	1050.93	5.10788	4.61919	nan	nan	nan
27/03/2018 02:30	nan	173.361	-43.8727	12.467	nan	nan	33.8251	17.1124	17.6792	27.9736	17.4646	287.417	234.477	5.3	0	4.79184	1053.44	5.0513	4.56189	nan	nan	nan
27/03/2018 02:40	nan	173.386	-43.9022	12.709	nan	nan	33.9054	17.0048	17.5635	27.9692	17.3934	291.322	237.521	4.33	0	3.91484	1059.5	3.54142	3.03615	nan	nan	nan
27/03/2018 02:50	nan	173.413	-43.9316	12.618	nan	nan	33.9592	16.9506	17.4307	27.9681	17.2607	293.391	239.081	4.3	0	3.88772	1066.51	3.48776	2.98437	nan	nan	nan
27/03/2018 03:00	nan	173.441	-43.9599	12.544	nan	nan	33.9976	16.9411	17.3908	27.9726	17.2	293.597	239.172	2.85	0	2.57675	1068.63	1.74743	1.30971	nan	nan	nan
27/03/2018 03:10	nan	173.47	-43.9884	12.696	nan	nan	34.0036	16.9303	17.4016	27.9793	17.2028	293.589	239.157	4.72	0	4.26745	1068.06	4.09528	3.59323	nan	nan	nan
27/03/2018 03:20	nan	173.498	-44.0174	12.834	nan	nan	34.0018	16.9137	17.3971	27.9807	17.2232	293.213	238.861	4.31	0	3.89676	1068.3	3.49881	2.99576	nan	nan	nan
27/03/2018 03:30	nan	173.526	-44.0467	13.243	nan	nan	34.0063	16.8876	17.3809	27.986	17.2469	293.24	238.886	3.69	0	3.33621	1069.16	2.68328	2.19498	nan	nan	nan
27/03/2018 03:40	nan	173.555	-44.0766	13.273	nan	nan	34.0183	16.8361	17.3476	27.9899	17.4316	294.834	240.235	4.07	0	3.67977	1070.93	3.16723	2.66813	nan	nan	nan
27/03/2018 03:50	nan	173.583	-44.1069	13.222	nan	nan	34.0305	16.6674	17.2704	27.9943	17.2797	295.873	241.007	3.88	5	3.50799	1075.05	2.91364	2.42018	nan	nan	nan
27/03/2018 04:00	nan	173.612	-44.137	13.315	nan	nan	34.0479	16.4962	17.0227	27.9973	16.9981	299.596	243.908	4.01	5	3.62553	1088.42	3.06294	2.56914	nan	nan	nan
27/03/2018 04:10	nan	173.642	-44.1668	13.096	nan	nan	34.0726	16.361	16.8348	28.0003	16.7538	304.463	247.739	4	5	3.61648	1098.71	3.03561	2.54435	nan	nan	nan
27/03/2018 04:20	nan	173.67	-44.1968	13.196	nan	nan	34.0811	16.1362	16.7058	28.0016	16.6481	304.15	247.431	7.18	5	6.49159	1105.84	8.48334	8.1715	nan	nan	nan
27/03/2018 04:30	nan	173.698	-44.2265	12.8	nan	nan	34.091	16.0942	16.4217	28.0048	16.4015	306.109	248.913	3.64	5	3.291	1121.76	2.55995	2.08522	nan	nan	nan
27/03/2018 04:40	nan	173.726	-44.2561	12.961	nan	nan	34.0735	16.2943	16.4672	28.0061	16.2881	307.548	250.065	4.9	5	4.43019	1119.19	4.27039	3.78302	nan	nan	nan
27/03/2018 04:50	nan	173.754	-44.2861	13.195	nan	nan	34.0576	16.2871	16.8138	28.0033	16.6392	303.921	247.276	2.63	5	2.37784	1099.87	1.51193	1.09936	nan	nan	nan
27/03/2018 05:00	nan	173.783	-44.3167	13.122	nan	nan	34.0652	16.2563	16.7452	28.0066	16.6684	304.241	247.536	6.31	0	5.705	1103.65	6.72825	6.31744	nan	nan	nan
27/03/2018 05:10	nan	173.811	-44.347	13.273	nan	nan	34.0664	16.2458	16.6924	28.0092	16.5721	303.848	247.177	2.97	0	2.68524	1106.58	1.83713	1.39772	nan	nan	nan
27/03/2018 05:20	nan	173.841	-44.3774	13.341	nan	nan	34.0627	16.2231	16.6856	28.0086	16.576	302.294	245.921	1.79	0	1.61838	1106.96	0.824842	0.50762	nan	nan	nan
27/03/2018 05:30	nan	173.871	-44.4081	13.663	nan	nan	34.0624	16.1767	16.6563	28.0033	16.543	303.946	247.252	3.73	0	3.37237	1108.6	2.6836	2.20257	nan	nan	nan
27/03/2018 05:40	nan	173.9	-44.439	13.402	nan	nan	34.0692	16.0865	16.5961	27.9935	16.487	305.179	248.223	2.31	0	2.08852	1111.96	1.22219	0.843488	nan	nan	nan
27/03/2018 05:50	nan	173.93	-44.4697	13.559	nan	nan	34.0672	16.0014	16.4872	27.97	16.4162	306.375	249.171	1.71	0	1.54605	1118.06	0.765869	0.460954	nan	nan	nan
27/03/2018 06:00	nan	173.961	-44.5004	13.822	nan	nan	34.0758	16.1172	16.4117	27.9344	16.2606	303.39	246.671	2.53	5	2.28743	1122.33	1.40624	1.00712	nan	nan	nan
27/03/2018 06:10	nan	173.993	-44.5312	13.659	nan	nan	34.0639	16.1803	16.6373	27.9067	16.4613	301.801	245.474	3.06	5	2.76661	1109.65	1.92693	1.48166	nan	nan	nan
27/03/2018 06:20	nan	174.022	-44.5627	13.604	nan	nan	34.0573	16.1573	16.7073	27.8843	16.5513	299.82	243.906	2.36	5	2.13373	1105.76	1.26791	0.882863	nan	nan	nan
27/03/2018 06:30	nan	174.051	-44.5946	13.705	nan	nan	34.0489	15.668	16.6412	27.8605	16.5876	298.106	242.538	1.38	5	1.24769	1109.44	0.559693	0.301374	nan	nan	nan
27/03/2018 06:40	nan	174.081	-44.6264	13.675	nan	nan	33.9129	15.0236	15.8658	27.8478	16.051	306.461	249.332	2.19	5	1.98003	1153.78	1.10311	0.744261	nan	nan	nan
27/03/2018 06:50	nan	174.11	-44.6578	13.418	nan	nan	33.7832	14.7281	15.0456	27.8423	15.1297	312.697	254.239	2.83	5	2.55866	1203.22	1.62799	1.21702	nan	nan	nan
27/03/2018 07:00	nan	174.138	-44.6893	13.47	nan	nan	33.7794	14.5747	14.8542	27.8365	14.8228	314.568	255.642	3.77	5	3.40854	1215.15	2.60996	2.14915	nan	nan	nan
27/03/2018 07:10	nan	174.167	-44.7201	13.366	nan	nan	33.7565	14.6441	14.7941	27.8324	14.7302	317.526	258.044	3.03	5	2.73949	1218.93	1.80893	1.3861	nan	nan	nan
27/03/2018 07:20	nan	174.196	-44.7503	13.316	nan	nan	33.7475	15.0494	15.0081	27.8312	14.7953	308.093	250.418	2.54	5	2.29647	1205.55	1.36545	0.979431	nan	nan	nan
27/03/2018 07:30	nan	174.226	-44.7805	13.449	nan	nan	33.7805	15.2493	15.6475	27.831	15.3796	299.003	243.205	1.96	5	1.77208	1166.68	0.923123	0.592838	nan	nan	nan
27/03/2018 07:40	nan	174.255	-44.811	13.202	nan	nan	33.7843	15.2559	15.8135	27.8305	15.6597	297.705	242.25	1.59	5	1.43755	1156.85	0.675148	0.39179	nan	nan	nan
27/03/2018 07:50	nan	174.284	-44.8411	13.265	nan	nan	33.7769	15.2423	15.7223	27.8321	15.6152	297.629	242.182	2.45	5	2.2151	1162.24	1.31264	0.928076	nan	nan	nan
27/03/2018 08:00	nan	174.313	-44.8713	13.362	nan	nan	33.7764	15.1285	15.6771	27.8325	15.5517	299.027	243.297	2.51	5	2.26934	1164.92	1.36284	0.972967	nan	nan	nan
27/03/2018 08:10	nan	174.342	-44.9016	13.192	nan	nan	33.7682	15.1023	15.4937	27.8364	15.4039	300.238	244.237	3.04	0	2.74853	1175.88	1.85176	1.42058	nan	nan	nan
27/03/2018 08:20	nan	174.371	-44.9314	13.049	nan	nan	33.767	15.0609	15.4899	27.8367	15.4136	300.216	244.224	2.44	0	2.20606	1176.1	1.29639	0.915073	nan	nan	nan
27/03/2018 08:30	nan	174.4	-44.9614	13.302	nan	nan	33.7606	14.9781	15.4389	27.8325	15.5285	300.369	244.403	2.76	0	2.49537	1179.17	1.57882	1.16931	nan	nan	nan
27/03/2018 08:40	nan	174.429	-44.9915	12.996	nan	nan	33.7574	14.9774	15.3243	27.8357	15.3802	300.306	244.3	2.98	0	2.69428	1186.12	1.78429	1.35915	nan	nan	nan
27/03/2018 08:50	nan	174.458	-45.0214	12.919	nan	nan	33.7618	15.0317	15.3699	27.8385	15.3303	300.401	244.351	2.8	0	2.53154	1183.35	1.61335	1.20132	nan	nan	nan
27/03/2018 09:00	nan	174.487	-45.0512	13.229	nan	nan	33.7625	14.9957	15.4611	27.8352	15.4693	299.671	243.81	2.95	0	2.66716	1177.84	1.76106	1.33659	nan	nan	nan
27/03/2018 09:10	nan	174.516	-45.0812	13.161	nan	nan	33.7595	14.9466	15.3935	27.833	15.4122	299.397	243.569	3.19	0	2.88415	1181.92	2.00003	1.56022	nan	nan	nan
27/03/2018 09:20	nan	174.545	-45.1114	13.199	nan	nan	33.7551	14.8711	15.3298	27.8289	15.3559	300.419	244.386	2.97	0	2.68524	1185.78	1.77472	1.35023	nan	nan	nan
27/03/2018 09:30	nan	174.574	-45.141	12.885	nan	nan	33.7475	14.88	15.2406	27.8312	15.2597	301.612	245.33	3.68	0	3.32717	1191.22	2.53046	2.06823	nan	nan	nan
27/03/2018 09:40	nan	174.602	-45.1704	12.868	nan	nan	33.7521	15.0563	15.2962	27.8236	15.2672	300.312	244.269	4.06	0	3.67073	1187.83	2.99472	2.52101	nan	nan	nan
27/03/2018 09:50	nan	174.631	-45.2001	13.064	nan	nan	33.7682	15.286	15.5791	27.8162	15.4681	298.326	242.706	4.47	0	4.04142	1170.76	3.55918	3.07808	nan	nan	nan
27/03/2018 10:00	nan	174.66	-45.2298	13.22	nan	nan	33.7855	15.4113	15.8787	27.8099	15.6972	296.958	241.655	5.71	0	5.16253	1153.02	5.50823	5.06119	nan	nan	nan
27/03/2018 10:10	nan	174.689	-45.2593	13.148	nan	nan	33.794	15.4814	15.9745	27.8077	15.8528	296.211	241.093	5.39	0	4.87321	1147.43	4.98585	4.52078	nan	nan	nan
27/03/2018 10:20	nan	174.717	-45.2887	12.595	nan	nan	33.7961	15.6188	16.0157	27.8066	15.9108	296.28	241.168	6.05	0	5.46993	1145.03	6.12675	5.70165	nan	nan	nan
27/03/2018 10:30	nan	174.745	-45.3175	12.641	nan	nan	33.8056	15.7613	16.1882	27.7995	16.2227	294.337	239.69	5.91	0	5.34336	1135.07	5.90201	5.46465	nan	nan	nan
27/03/2018 10:40	nan	174.773	-45.3462	12.697	nan	nan	33.7978	15.8463	16.3485	27.7964	16.4083	293.299	238.925	6.95	0	6.28364	1125.91	7.92631	7.58781	nan	nan	nan
27/03/2018 10:50	nan	174.801	-45.3747	12.537	nan	nan	33.8028	15.9542	16.4125	27.7926	16.4721	293.194	238.855	6.94	0	6.2746	1122.28	7.91848	7.57821	nan	nan	nan
27/03/2018 11:00	nan	174.829	-45.403	12.604	nan	nan	33.8108	16.0233	16.529	27.792	16.5917	291.128	237.205	6.98	0	6.31077	1115.72	8.02467	7.68834	nan	nan	nan
27/03/2018 11:10	nan	174.857	-45.4315	12.596	nan	nan	33.813	16.0665	16.5803	27.789	16.6547	290.841	236.991	6.67	0	6.03049	1112.84	7.40266	7.02966	nan	nan	nan
27/03/2018 11:20	nan	174.886	-45.4602	12.457	nan	nan	33.8153	16.0952	16.607	27.789	16.6936	290.663	236.857	7.75	0	7.00694	1111.34	9.72312	9.49681	nan	nan	nan
27/03/2018 11:30	nan	174.914	-45.4892	12.796	nan	nan	33.8152	16.0931	16.6243	27.7858	16.7111	290.78	236.959	7.59	0	6.86228	1110.38	9.36454	9.1127	nan	nan	nan
27/03/2018 11:40	nan	174.942	-45.5184	12.713	nan	nan	33.8093	16.0429	16.6001	27.7799	16.7098	291.41	237.481	8.78	0	7.93818	1111.73	12.2191	12.1867	nan	nan	nan
27/03/2018 11:50	nan	174.97	-45.5473	12.592	nan	nan	33.7999	15.9951	16.5211	27.7786	16.6431	292.644	238.475	8.02	0	7.25105	1116.16	10.3282	10.1481	nan	nan	nan
27/03/2018 12:00	nan	174.998	-45.576	12.496	nan	nan	33.7961	15.9446	16.4618	27.7742	16.5807	293.743	239.352	8.64	0	7.81161	1119.5	11.8218	11.7602	nan	nan	nan
27/03/2018 12:10	nan	175.025	-45.6044	12.085	nan	nan	33.7975	15.919	16.3992	27.7696	16.4259	294.599	239.99	9.55	0	8.63436	1123.04	14.199	14.3453	nan	nan	nan
27/03/2018 12:20	nan	175.051	-45.6324	12.337	nan	nan	33.7993	15.9682	16.3859	27.7633	16.3103	294.562	239.915	7.8	0	7.05214	1123.79	9.78322	9.56632	nan	nan	nan
27/03/2018 12:30	nan	175.077	-45.6609	12.336	nan	nan	33.7919	15.9835	16.4789	27.7574	16.4019	292.788	238.515	8.24	0	7.44996	1118.53	10.8412	10.7011	nan	nan	nan
27/03/2018 12:40	nan	175.103	-45.6895	12.367	0.313148	nan	33.7925	15.9664	16.4873	27.7563	16.43	293.503	239.107	8.17	0	7.38667	1118.06	10.6754	10.5223	nan	nan	nan
27/03/2018 12:50	nan	175.13	-45.7177	12.232	2.44187	nan	33.7943	15.9174	16.452	27.756	16.4063	295.042	240.349	6.95	0	6.28364	1120.05	7.94701	7.60763	nan	nan	nan
27/03/2018 13:00	nan	175.157	-45.7457	12.2	1.31806	nan	33.7955	15.885	16.3809	27.7529	16.355	295.746	240.902	4.44	0	4.0143	1124.07	3.5903	3.09933	nan	nan	nan
27/03/2018 13:10	nan	175.185	-45.7732	12.403	2.70196	nan	33.793	15.8843	16.3466	27.7461	16.3111	295.606	240.775	5.91	0	5.34336	1126.02	5.92569	5.48657	nan	nan	nan
27/03/2018 13:20	nan	175.213	-45.8007	12.379	2.12061	nan	33.7922	15.9106	16.3614	27.7475	16.3225	295.478	240.676	7.17	0	6.48255	1125.18	8.38889	8.07841	nan	nan	nan
27/03/2018 13:30	nan	175.241	-45.8291	12.657	1.22549	nan	33.7977	16.0352	16.4034	27.7402	16.3292	294.965	240.252	7.14	0	6.45542	1122.8	8.33424	8.01945	nan	nan	nan
27/03/2018 13:40	nan	175.269	-45.8578	12.676	1.26852	nan	33.7999	16.1085	16.5908	27.7387	16.4921	291.574	237.547	5.18	0	4.68335	1112.25	4.7218	4.24089	nan	nan	nan
27/03/2018 13:50	nan	175.297	-45.8866	12.39	0.763503	nan	33.7986	16.1515	16.6589	27.7369	16.5925	290.959	237.085	6.2	0	5.60555	1108.45	6.50558	6.08589	nan	nan	nan
27/03/2018 14:00	nan	175.326	-45.915	12.62	1.85533	nan	33.7946	16.1807	16.688	27.7375	16.6339	290.724	236.914	6.61	0	5.97624	1106.83	7.30297	6.92248	nan	nan	nan
27/03/2018 14:10	nan	175.355	-45.9434	12.787	-0.399512	nan	33.7905	16.1914	16.7071	27.7249	16.6513	290.838	237.02	9.75	0	8.81518	1105.77	14.8698	15.0687	nan	nan	nan
27/03/2018 14:20	nan	175.384	-45.9717	12.54	1.39631	nan	33.7891	16.1918	16.7206	27.6914	16.6652	290.649	236.873	9.33	0	8.43545	1105.02	13.7101	13.8031	nan	nan	nan
27/03/2018 14:30	nan	175.412	-46.0002	12.328	1.39643	nan	33.7893	16.1893	16.7235	27.6557	16.6734	290.697	236.915	9.87	0	8.92368	1104.86	15.2174	15.4483	nan	nan	nan
27/03/2018 14:40	nan	175.439	-46.0287	12.427	1.02157	nan	33.7929	16.1885	16.7307	27.6242	16.678	290.932	237.103	9.9	0	8.9508	1104.46	15.3061	15.5451	nan	nan	nan
27/03/2018 14:50	nan	175.465	-46.0572	12.249	-0.200116	nan	33.7948	16.1845	16.7357	27.5828	16.6832	291.129	237.262	10.81	0	9.77355	1104.18	18.0311	18.5366	nan	nan	nan
27/03/2018 15:00	nan	175.493	-46.0853	12.345	0.878695	nan	33.7961	16.1562	16.7345	27.5449	16.6864	291.183	237.306	10.57	0	9.55656	1104.25	17.2909	17.7221	nan	nan	nan
27/03/2018 15:10	nan	175.521	-46.1129	11.906	1.5893	nan	33.8023	16.0778	16.6986	27.5053	16.6674	291.017	237.155	10.75	0	9.7193	1106.24	17.8281	18.3143	nan	nan	nan
27/03/2018 15:20	nan	175.549	-46.1406	12.33	0.75341	nan	33.8281	16.0537	16.5943	27.4686	16.5863	290.667	236.802	9.86	0	8.91463	1112.05	15.1396	15.367	nan	nan	nan
27/03/2018 15:30	nan	175.577	-46.1684	12.463	1.00132	nan	33.8312	16.0734	16.582	27.4499	16.5293	290.366	236.532	9.45	0	8.54394	1112.75	13.9892	14.1112	nan	nan	nan
27/03/2018 15:40	nan	175.605	-46.1964	12.365	-0.711294	nan	33.829	16.0739	16.6183	27.4412	16.5679	290.212	236.424	9.4	0	8.49874	1110.72	13.8652	13.975	nan	nan	nan
27/03/2018 15:50	nan	175.633	-46.225	12.675	0.201116	nan	33.8316	16.0717	16.6057	27.4328	16.5731	290.072	236.308	10.89	0	9.84588	1111.42	18.2214	18.7506	nan	nan	nan
27/03/2018 16:00	nan	175.661	-46.2538	12.603	-1.12503	nan	33.8233	16.054	16.5955	27.4139	16.5544	290.044	236.29	12.58	0	11.3738	1111.99	23.8778	25.0155	nan	nan	nan
27/03/2018 16:10	nan	175.688	-46.2829	12.728	-0.135793	nan	33.8277	16.0464	16.577	27.3856	16.5425	290.694	236.809	12.17	0	11.0032	1113.03	22.424	23.4006	nan	nan	nan
27/03/2018 16:20	nan	175.716	-46.3121	12.67	-0.891613	nan	33.8307	16.0981	16.5768	27.3698	16.5285	290.604	236.726	12.7	0	11.4823	1113.04	24.2973	25.4831	nan	nan	nan
27/03/2018 16:30	nan	175.746	-46.3407	12.68	0.158032	nan	33.8051	16.1689	16.6563	27.3605	16.5827	290.181	236.438	13.41	0	12.1243	1108.6	26.978	28.4688	nan	nan	nan
27/03/2018 16:40	nan	175.775	-46.3694	12.813	1.39693	nan	33.7888	16.2093	16.7452	27.3537	16.6762	290.143	236.465	14.78	0	13.3629	1103.66	32.51	34.6602	nan	nan	nan
27/03/2018 16:50	nan	175.805	-46.3984	12.795	1.35149	nan	33.7896	16.2265	16.7765	27.3421	16.7177	290.421	236.705	15.41	0	13.9325	1101.92	35.2224	37.7076	nan	nan	nan
27/03/2018 17:00	nan	175.834	-46.4275	12.715	0.88556	nan	33.7939	16.2262	16.7802	27.3346	16.73	290.637	236.88	15.52	0	14.032	1101.72	35.7057	38.2513	nan	nan	nan
27/03/2018 17:10	nan	175.862	-46.4571	12.817	-1.00891	nan	33.7972	16.219	16.77	27.3266	16.7291	290.985	237.159	15.54	0	14.05	1102.28	35.7842	38.3402	nan	nan	nan
27/03/2018 17:20	nan	175.891	-46.4867	12.755	0.507128	nan	33.8006	16.2114	16.7536	27.317	16.7145	291.264	237.375	14.93	0	13.4985	1103.19	33.1466	35.3747	nan	nan	nan
27/03/2018 17:30	nan	175.92	-46.5163	13.062	0.244571	nan	33.8017	16.2104	16.7426	27.3059	16.6953	291.647	237.679	14.86	0	13.4352	1103.8	32.8429	35.0342	nan	nan	nan
27/03/2018 17:40	nan	175.949	-46.5459	12.834	1.55711	nan	33.8017	16.2057	16.7463	27.297	16.6984	291.647	237.68	14.31	0	12.938	1103.6	30.5771	32.4917	nan	nan	nan
27/03/2018 17:50	nan	175.979	-46.5755	12.938	1.09433	nan	33.8042	16.1838	16.7426	27.287	16.7005	291.643	237.674	14	0	12.6577	1103.8	29.3312	31.0964	nan	nan	nan
27/03/2018 18:00	nan	176.009	-46.6048	12.884	1.50396	nan	33.8142	16.1519	16.7044	27.2785	16.6739	291.532	237.56	13.97	0	12.6306	1105.92	29.1843	30.9336	nan	nan	nan
27/03/2018 18:10	nan	176.038	-46.6337	12.737	-0.470929	nan	33.8195	16.1199	16.6612	27.2711	16.627	291.26	237.313	14.79	0	13.372	1108.32	32.4832	34.634	nan	nan	nan
27/03/2018 18:20	nan	176.068	-46.6622	12.412	0.175257	nan	33.8175	16.1038	16.6285	27.2587	16.592	290.903	237.012	15.53	0	14.041	1110.14	35.6136	38.1551	nan	nan	nan
27/03/2018 18:30	nan	176.096	-46.6907	12.484	0.00635007	nan	33.821	16.0934	16.6294	27.239	16.5853	290.574	236.736	14.95	0	13.5166	1110.09	33.1275	35.3591	nan	nan	nan
27/03/2018 18:40	nan	176.124	-46.7195	12.483	-0.0310603	nan	33.8218	16.0899	16.6128	27.2193	16.5572	290.811	236.918	14.68	0	13.2725	1111.02	31.987	34.0792	nan	nan	nan
27/03/2018 18:50	nan	176.142	-46.7356	1.958	-1.33548	nan	33.8251	16.0758	16.605	27.1715	16.5382	290.954	237.023	15.24	0	13.7788	1111.46	34.3387	36.7217	nan	nan	nan
27/03/2018 19:00	nan	176.142	-46.7356	0.649	0.706038	nan	33.8291	16.1029	16.6055	27.1341	16.5318	291.185	237.203	6.03	0	5.45185	1111.43	6.18205	5.74901	nan	nan	nan
27/03/2018 19:10	nan	176.142	-46.7356	0.413	2.12373	nan	33.8301	16.1078	16.659	27.1174	16.5898	290.771	236.885	5.81	0	5.25294	1108.45	5.79385	5.34434	nan	nan	nan
27/03/2018 19:20	nan	176.142	-46.7356	0.548	0.903552	nan	33.8312	16.1034	16.6531	27.1105	16.5698	290.822	236.918	6.04	0	5.46089	1108.77	6.20777	5.77499	nan	nan	nan
27/03/2018 19:30	nan	176.142	-46.7356	0.452	1.16955	nan	33.8329	16.1225	16.6344	27.1081	16.5811	290.802	236.903	6.55	0	5.92199	1109.82	7.17449	6.78822	nan	nan	nan
27/03/2018 19:40	nan	176.142	-46.7356	0.493	0.830306	nan	33.8362	16.125	16.6491	27.1051	16.5808	290.779	236.88	6.83	0	6.17515	1109	7.73923	7.38372	nan	nan	nan
27/03/2018 19:50	nan	176.142	-46.7356	0.409	1.0568	nan	33.8382	16.2196	16.6451	27.1006	16.5665	290.78	236.873	6.74	0	6.09378	1109.22	7.55552	7.18969	nan	nan	nan
27/03/2018 20:00	nan	176.142	-46.7356	0.612	-0.238973	nan	33.8399	16.2003	16.7935	27.0946	16.6674	290.516	236.692	8.34	0	7.54037	1100.99	11.1716	11.0494	nan	nan	nan
27/03/2018 20:10	nan	176.142	-46.7356	0.464	0.900277	nan	33.8407	16.1773	16.7218	27.0887	16.6875	290.716	236.862	9.41	0	8.50778	1104.96	13.9287	14.0413	nan	nan	nan
27/03/2018 20:20	nan	176.142	-46.7356	0.579	1.17536	nan	33.8424	16.1969	16.6891	27.0779	16.6261	290.768	236.879	8.55	0	7.73024	1106.77	11.6629	11.5825	nan	nan	nan
27/03/2018 20:30	nan	176.142	-46.7356	0.664	0.143471	nan	33.8437	16.1727	16.7307	27.057	16.6552	290.682	236.817	9.15	0	8.27271	1104.46	13.2287	13.279	nan	nan	nan
27/03/2018 20:40	nan	176.142	-46.7356	0.546	0.652732	nan	33.8455	16.1745	16.7071	27.0256	16.6336	290.785	236.891	10.58	0	9.5656	1105.77	17.3095	17.7435	nan	nan	nan
27/03/2018 20:50	nan	176.142	-46.7356	0.511	2.04237	nan	33.8467	16.1516	16.7252	26.9825	16.6599	290.788	236.901	11.11	0	10.0448	1104.77	18.9723	19.5745	nan	nan	nan
27/03/2018 21:00	nan	176.142	-46.7356	0.579	1.33386	nan	33.8473	16.1072	16.7114	26.9147	16.6431	290.77	236.88	11.8	0	10.6686	1105.53	21.2321	22.0738	nan	nan	nan
27/03/2018 21:10	nan	176.142	-46.7356	0.624	0.788205	nan	33.8479	16.052	16.6869	26.8424	16.6379	290.877	236.964	10.81	0	9.77355	1106.89	18.009	18.5139	nan	nan	nan
27/03/2018 21:20	nan	176.142	-46.7356	0.556	0.254027	nan	33.8484	16.0102	16.6377	26.7693	16.5984	290.979	237.032	9.53	0	8.61627	1109.63	14.2292	14.3713	nan	nan	nan
27/03/2018 21:30	nan	176.142	-46.7356	0.597	-0.76704	nan	33.8495	15.9913	16.6062	26.6976	16.5613	291.048	237.073	8.52	0	7.70311	1111.39	11.5637	11.4774	nan	nan	nan
27/03/2018 21:40	nan	176.142	-46.7356	0.835	1.68468	nan	33.8501	15.9787	16.6091	26.6256	16.5554	291.089	237.103	8.3	0	7.50421	1111.23	11.0224	10.8931	nan	nan	nan
27/03/2018 21:50	nan	176.142	-46.7356	0.525	0.265629	nan	33.8501	15.9662	16.608	26.5554	16.5632	290.974	237.013	8.86	0	8.01051	1111.29	12.4274	12.4123	nan	nan	nan
27/03/2018 22:00	nan	176.145	-46.7375	5.272	0.103459	nan	33.8507	15.9544	16.6063	26.4876	16.5534	291.162	237.161	10.09	0	9.12258	1111.39	15.8068	16.0971	nan	nan	nan
27/03/2018 22:10	nan	176.167	-46.7603	12.361	1.20663	nan	33.8517	15.9346	16.6055	26.4185	16.5571	291.104	237.114	12.63	0	11.419	1111.43	24.0629	25.2211	nan	nan	nan
27/03/2018 22:20	nan	176.193	-46.7893	12.298	0.571269	nan	33.8564	15.9194	16.6026	26.3482	16.5619	291.146	237.143	17.89	0	16.1747	1111.59	46.6278	50.5995	nan	nan	nan
27/03/2018 22:30	nan	176.22	-46.8179	12.316	0.303179	nan	33.8592	15.9027	16.5909	26.2718	16.5507	291.003	237.018	17.62	0	15.9306	1112.25	45.2765	49.0693	nan	nan	nan
27/03/2018 22:40	nan	176.248	-46.8461	12.226	0.214398	nan	33.8599	15.8883	16.5855	26.1709	16.5508	290.918	236.948	17.33	0	15.6684	1112.55	43.8556	47.461	nan	nan	nan
27/03/2018 22:50	nan	176.276	-46.8741	12.34	-0.041814	nan	33.8653	15.8528	16.5938	26.0585	16.5627	290.754	236.811	17.98	0	16.2561	1112.09	47.0677	51.0986	nan	nan	nan
27/03/2018 23:00	nan	176.304	-46.902	12.272	-0.620223	nan	33.8701	15.7632	16.5645	25.9403	16.5615	290.537	236.627	17.93	0	16.2109	1113.73	46.7829	50.7774	nan	nan	nan
27/03/2018 23:10	nan	176.333	-46.9297	12.216	0.569414	nan	33.8692	15.6815	16.4558	25.82	16.4644	292.07	237.841	18.98	0	17.1602	1119.83	52.0345	56.7433	nan	nan	nan
27/03/2018 23:20	nan	176.361	-46.9572	12.014	1.1344	nan	33.8764	15.6023	16.3802	25.6869	16.3857	292.279	237.971	20.37	0	18.4169	1124.11	59.4927	65.2343	nan	nan	nan
27/03/2018 23:30	nan	176.388	-46.9849	12.034	0.125763	nan	33.8793	15.5632	16.3168	25.5499	16.3108	291.527	237.328	20.45	0	18.4893	1127.72	59.8474	65.6426	nan	nan	nan
27/03/2018 23:40	nan	176.415	-47.0127	11.869	0.34132	nan	33.8746	15.5235	16.311	25.4191	16.2769	291.953	237.668	19.93	0	18.0191	1128.05	56.9455	62.3376	nan	nan	nan
27/03/2018 23:50	nan	176.442	-47.0403	11.955	-1.13692	nan	33.8764	15.4995	16.3286	25.2922	16.2507	292.931	238.452	18.88	0	17.0698	1127.05	51.3445	55.967	nan	nan	nan
28/03/2018 00:00	nan	176.47	-47.068	12.061	0.626431	nan	33.8762	15.4616	16.5897	25.1726	16.4942	292.999	238.598	18.26	0	16.5093	1112.31	48.4772	52.6971	nan	nan	nan
28/03/2018 00:10	nan	176.497	-47.0958	12.084	0.647922	nan	33.8731	15.3777	16.5768	25.0737	16.5489	292.948	238.582	17.89	0	16.1747	1113.04	46.5976	50.5667	nan	nan	nan
28/03/2018 00:20	nan	176.525	-47.1233	12.182	-0.470483	nan	33.8677	15.3837	16.4646	24.9938	16.446	293.961	239.376	19.03	0	17.2054	1119.34	52.3095	57.0552	nan	nan	nan
28/03/2018 00:30	nan	176.553	-47.1509	12.183	1.29497	nan	33.87	15.4	16.5016	24.9247	16.4478	293.826	239.263	18.71	0	16.9161	1117.26	50.6816	55.2039	nan	nan	nan
28/03/2018 00:40	nan	176.581	-47.1784	12.246	1.10271	nan	33.8702	15.4059	16.5254	24.8554	16.4752	293.768	239.226	20.25	0	18.3085	1115.92	59.0357	64.7042	nan	nan	nan
28/03/2018 00:50	nan	176.609	-47.2057	12.103	0.575827	nan	33.8715	15.4053	16.5341	24.7859	16.4921	293.809	239.264	20.27	0	18.3265	1115.43	59.1608	64.8463	nan	nan	nan
28/03/2018 01:00	nan	176.637	-47.2337	12.384	1.51375	nan	33.8729	15.3931	16.5362	24.7102	16.5044	293.898	239.339	20.57	0	18.5978	1115.31	60.861	66.7835	nan	nan	nan
28/03/2018 01:10	nan	176.664	-47.2624	12.101	-0.0657256	nan	33.8727	15.3887	16.4732	24.6371	16.4774	293.945	239.368	19.32	0	17.4676	1118.86	53.8627	58.8201	nan	nan	nan
28/03/2018 01:20	nan	176.692	-47.2899	12.052	nan	nan	33.875	15.3738	16.453	24.574	16.5291	293.726	239.205	18.04	0	16.3103	1119.99	47.2016	51.2584	nan	nan	nan
28/03/2018 01:30	nan	176.721	-47.3176	12.445	nan	nan	33.8717	15.3198	16.4276	24.5098	16.5067	293.828	239.285	18.5	0	16.7262	1121.43	49.5037	53.8711	nan	nan	nan
28/03/2018 01:40	nan	176.75	-47.3458	12.431	nan	nan	33.8686	15.2838	16.4144	24.447	16.5087	294.62	239.935	19.6	0	17.7208	1122.17	55.2907	60.4478	nan	nan	nan
28/03/2018 01:50	nan	176.779	-47.3744	12.399	nan	nan	33.8698	15.28	16.3887	24.3903	16.4765	295.097	240.309	18.5	0	16.7262	1123.63	49.4553	53.8184	nan	nan	nan
28/03/2018 02:00	nan	176.807	-47.4028	12.34	nan	nan	33.8708	15.3115	16.4047	24.3296	16.4701	294.812	240.074	18.1	0	16.3646	1122.73	47.4449	51.537	nan	nan	nan
28/03/2018 02:10	nan	176.835	-47.4314	12.318	nan	nan	33.8747	15.3194	16.4643	24.2797	16.533	294.155	239.556	18.11	0	16.3736	1119.36	47.5666	51.6715	nan	nan	nan
28/03/2018 02:20	nan	176.863	-47.4599	12.326	nan	nan	33.877	15.3559	16.4665	24.2758	16.5485	294.572	239.898	17.93	0	16.2109	1119.23	46.6677	50.6523	nan	nan	nan
28/03/2018 02:30	nan	176.891	-47.4881	12.376	nan	nan	33.8777	15.3765	16.4827	24.306	16.557	294.503	239.844	16.98	0	15.352	1118.32	42.0688	45.4455	nan	nan	nan
28/03/2018 02:40	nan	176.92	-47.5162	12.17	nan	nan	33.8741	15.4126	16.4605	24.3555	16.5448	294.942	240.203	17.3	0	15.6413	1119.57	43.5732	47.1483	nan	nan	nan
28/03/2018 02:50	nan	176.948	-47.5436	12.218	nan	nan	33.8797	15.4596	16.477	24.4103	16.5453	296.108	241.144	17.18	0	15.5328	1118.64	43.0149	46.5158	nan	nan	nan
28/03/2018 03:00	nan	176.978	-47.5708	12.209	nan	nan	33.8814	15.5095	16.5117	24.4624	16.581	297.119	241.979	17.11	0	15.4695	1116.69	42.7178	46.1778	nan	nan	nan
28/03/2018 03:10	nan	177.006	-47.5986	12.285	nan	nan	33.882	15.5421	16.5548	24.5084	16.6193	296.884	241.8	16.75	0	15.144	1114.27	41.0614	44.303	nan	nan	nan
28/03/2018 03:20	nan	177.034	-47.627	12.379	nan	nan	33.8817	15.5395	16.5723	24.5608	16.6473	295.683	240.833	17.91	0	16.1928	1113.29	46.6922	50.6741	nan	nan	nan
28/03/2018 03:30	nan	177.063	-47.6556	12.604	nan	nan	33.8797	15.5033	16.5452	24.6131	16.2486	297.263	241.972	18.5	0	16.7262	1114.81	49.6506	54.0309	nan	nan	nan
28/03/2018 03:40	nan	177.092	-47.6842	12.284	nan	nan	33.8724	15.4824	16.4805	24.6673	16.2635	296.214	241.135	17.96	0	16.238	1118.44	46.8338	50.8399	nan	nan	nan
28/03/2018 03:50	nan	177.12	-47.7124	12.502	nan	nan	33.867	15.4662	16.4536	24.7224	16.3838	294.597	239.872	16.84	0	15.2254	1119.96	41.3783	44.6665	nan	nan	nan
28/03/2018 04:00	nan	177.148	-47.7408	12.472	nan	nan	33.8641	15.4716	16.427	24.7774	16.4348	294.693	239.973	17.35	0	15.6865	1121.46	43.7774	47.3811	nan	nan	nan
28/03/2018 04:10	nan	177.177	-47.7694	12.752	nan	nan	33.8673	15.4933	16.4396	24.8275	16.5023	294.796	240.078	17.5	0	15.8221	1120.75	44.5184	48.2192	nan	nan	nan
28/03/2018 04:20	nan	177.207	-47.7983	12.801	nan	nan	33.869	15.5013	16.4728	24.8798	16.5431	294.445	239.805	17.16	0	15.5147	1118.88	42.9147	46.4026	nan	nan	nan
28/03/2018 04:30	nan	177.236	-47.8275	12.966	nan	nan	33.8697	15.4932	16.467	24.9313	16.5396	294.939	240.205	16.86	0	15.2435	1119.21	41.4862	44.7877	nan	nan	nan
28/03/2018 04:40	nan	177.267	-47.8571	12.979	nan	nan	33.8714	15.4026	16.4493	24.9859	16.5401	294.703	240.01	17.99	0	16.2651	1120.2	46.9469	50.9698	nan	nan	nan
28/03/2018 04:50	nan	177.296	-47.887	12.992	nan	nan	33.8598	15.3112	16.3052	25.0367	16.4269	295.904	240.963	18.09	0	16.3556	1128.37	47.276	51.3511	nan	nan	nan
28/03/2018 05:00	nan	177.326	-47.9175	13.112	nan	nan	33.8519	15.3353	16.1905	25.0821	16.2779	297.759	242.429	18.04	0	16.3103	1134.94	46.8898	50.9197	nan	nan	nan
28/03/2018 05:10	nan	177.355	-47.9479	12.951	nan	nan	33.8623	15.3954	16.2683	25.1285	16.3009	297.163	241.937	17.31	0	15.6503	1130.48	43.4104	46.9744	nan	nan	nan
28/03/2018 05:20	nan	177.385	-47.9779	13.066	nan	nan	33.8657	15.3812	16.3681	25.1708	16.4224	296.212	241.204	17.73	0	16.0301	1124.8	45.5627	49.4059	nan	nan	nan
28/03/2018 05:30	nan	177.416	-48.0074	13.067	nan	nan	33.8626	15.3685	16.331	25.2085	16.4186	296.779	241.668	18.57	0	16.7895	1126.91	49.7423	54.1476	nan	nan	nan
28/03/2018 05:40	nan	177.446	-48.0368	12.871	nan	nan	33.8642	15.3758	16.3165	25.241	16.3831	296.384	241.331	19.38	0	17.5219	1127.73	53.9709	58.9527	nan	nan	nan
28/03/2018 05:50	nan	177.477	-48.0659	12.809	nan	nan	33.8653	15.3467	16.3436	25.2594	16.3781	295.864	240.904	20.91	0	18.9052	1126.19	62.5091	68.6753	nan	nan	nan
28/03/2018 06:00	nan	177.508	-48.0946	12.848	nan	nan	33.8635	15.324	16.3067	25.2733	16.3959	296.132	241.132	20.2	0	18.2632	1128.29	58.4324	64.0311	nan	nan	nan
28/03/2018 06:10	nan	177.54	-48.1235	12.863	nan	nan	33.8631	15.3042	16.2898	25.2783	16.3681	296.543	241.456	20.49	0	18.5254	1129.25	60.0321	65.8547	nan	nan	nan
28/03/2018 06:20	nan	177.571	-48.1525	12.843	nan	nan	33.8646	15.291	16.2801	25.2814	16.3545	296.539	241.446	21.25	0	19.2126	1129.81	64.3793	70.8133	nan	nan	nan
28/03/2018 06:30	nan	177.6	-48.1824	12.867	nan	nan	33.8696	15.2782	16.2813	25.2855	16.3544	295.963	240.97	20.77	0	18.7786	1129.74	61.6085	67.6523	nan	nan	nan
28/03/2018 06:40	nan	177.629	-48.2123	13.086	nan	nan	33.872	15.2695	16.2786	25.2941	16.3522	295.716	240.763	18.7	0	16.9071	1129.89	50.3458	54.8357	nan	nan	nan
28/03/2018 06:50	nan	177.658	-48.242	12.814	nan	nan	33.874	15.2579	16.2708	25.3041	16.3412	295.717	240.758	20	0	18.0824	1130.34	57.2727	62.7126	nan	nan	nan
28/03/2018 07:00	nan	177.688	-48.2711	12.695	nan	nan	33.8753	15.2438	16.2583	25.3059	16.3302	295.563	240.626	20.51	0	18.5435	1131.05	60.0971	65.9309	nan	nan	nan
28/03/2018 07:10	nan	177.718	-48.3003	12.732	nan	nan	33.8746	15.2328	16.2418	25.3081	16.3152	295.694	240.728	21	0	18.9865	1132	62.8667	69.09	nan	nan	nan
28/03/2018 07:20	nan	177.748	-48.3294	12.676	nan	nan	33.8743	15.2212	16.2384	25.3113	16.3129	295.618	240.666	20.58	0	18.6068	1132.19	60.4622	66.3483	nan	nan	nan
28/03/2018 07:30	nan	177.779	-48.3585	12.924	nan	nan	33.8734	15.2049	16.2311	25.3123	16.3071	295.611	240.66	20.63	0	18.652	1132.61	60.7342	66.6588	nan	nan	nan
28/03/2018 07:40	nan	177.809	-48.3876	12.807	nan	nan	33.871	15.1605	16.2071	25.3193	16.2843	295.412	240.492	20.96	0	18.9504	1133.99	62.5812	68.7666	nan	nan	nan
28/03/2018 07:50	nan	177.839	-48.4164	12.511	nan	nan	33.8669	15.076	16.1508	25.3177	16.2425	295.594	240.631	20.73	0	18.7424	1137.22	61.178	67.17	nan	nan	nan
28/03/2018 08:00	nan	177.869	-48.4452	12.781	nan	nan	33.8637	14.8528	16.0348	25.3133	16.1491	296.107	241.018	20.67	5	18.6882	1143.93	60.6588	66.5857	nan	nan	nan
28/03/2018 08:10	nan	177.898	-48.4739	12.622	nan	nan	33.8507	14.0834	15.7432	25.3099	15.9505	297.226	241.873	19.8	5	17.9016	1161	55.4296	60.6475	nan	nan	nan
28/03/2018 08:20	59.5535	177.927	-48.5025	12.396	nan	nan	33.7851	13.225	14.6309	25.3056	15.1343	307.277	249.831	19.2	5	17.3591	1229.27	50.7755	55.4214	nan	nan	nan
28/03/2018 08:30	58.0951	177.955	-48.5307	12.157	nan	nan	33.7448	13.335	13.608	25.3015	13.8565	320.15	259.832	17.63	5	15.9397	1296.73	41.9779	45.4966	nan	nan	nan
28/03/2018 08:40	38.9947	177.984	-48.5588	12.014	nan	nan	33.788	13.6054	14.1348	25.3025	13.941	315.974	256.409	18.08	5	16.3465	1261.4	44.6663	48.5142	nan	nan	nan
28/03/2018 08:50	34.6538	178.013	-48.5866	12.331	nan	nan	33.8026	13.3269	14.6243	25.3068	14.6915	309.141	251.143	17.34	5	15.6775	1229.69	41.7605	45.1959	nan	nan	nan
28/03/2018 09:00	26.771	178.043	-48.6146	12.434	nan	nan	33.794	12.8794	14.1241	25.3089	14.4034	312.59	253.842	17.24	5	15.587	1262.11	40.7672	44.0986	nan	nan	nan
28/03/2018 09:10	13.8885	178.072	-48.6428	12.481	nan	nan	33.7664	12.6703	13.5317	25.3159	13.7731	318.303	258.264	16.05	5	14.5111	1301.96	35.015	37.6314	nan	nan	nan
28/03/2018 09:20	10.1374	178.101	-48.6708	12.456	nan	nan	33.7581	12.8809	13.3847	25.3241	13.434	320.963	260.293	15.38	5	13.9054	1312.1	32.1589	34.4214	nan	nan	nan
28/03/2018 09:30	18.3383	178.13	-48.6987	12.384	nan	nan	33.772	12.6185	13.8264	25.3258	13.7929	317.468	257.586	14.82	5	13.3991	1281.93	30.3201	32.3342	nan	nan	nan
28/03/2018 09:40	6.30463	178.158	-48.7271	12.476	nan	nan	33.7434	12.1381	13.3999	25.3285	13.703	321.237	260.652	17.25	5	15.5961	1311.04	40.0435	43.318	nan	nan	nan
28/03/2018 09:50	10.2146	178.187	-48.7557	12.502	nan	nan	33.7223	11.9511	12.7574	25.329	12.9935	328.359	266.16	16.97	5	15.3429	1356.55	38.1537	41.2139	nan	nan	nan
28/03/2018 10:00	1.34924	178.216	-48.7838	12.42	nan	nan	33.7064	11.9016	12.6736	25.3299	12.7627	329.243	266.803	17.42	5	15.7498	1362.64	40.0218	43.3316	nan	nan	nan
28/03/2018 10:10	1.02498	178.244	-48.8114	12.118	nan	nan	33.7042	11.9335	12.703	25.3308	12.7852	328.05	265.849	16.39	5	14.8185	1360.5	35.6505	38.389	nan	nan	nan
28/03/2018 10:20	2.56437	178.272	-48.8385	11.734	nan	nan	33.7125	11.9526	12.7554	25.3215	12.8251	327.719	265.585	17.5	5	15.8221	1356.7	40.4625	43.8262	nan	nan	nan
28/03/2018 10:30	8.12059	178.3	-48.8659	11.934	nan	nan	33.7117	11.9742	12.7915	25.3062	12.8696	327.53	265.452	17.15	5	15.5057	1354.08	38.9664	42.1313	nan	nan	nan
28/03/2018 10:40	4.55991	178.327	-48.8933	11.829	nan	nan	33.713	11.9088	12.8349	25.3038	12.9215	327.132	265.15	15.41	5	13.9325	1350.96	31.8107	34.0552	nan	nan	nan
28/03/2018 10:50	0.47224	178.355	-48.9204	11.964	nan	nan	33.7181	11.9547	12.7452	25.2938	12.8631	327.268	265.226	16.99	5	15.361	1357.43	38.2272	41.2977	nan	nan	nan
28/03/2018 11:00	2.39506	178.383	-48.9479	12.096	nan	nan	33.7215	12.018	12.82	25.2813	12.8673	326.582	264.666	16.92	5	15.2977	1352.03	38.0026	41.0399	nan	nan	nan
28/03/2018 11:10	0.371547	178.412	-48.9754	12.148	nan	nan	33.72	12.0448	12.9147	25.2736	12.9751	325.917	264.177	15.84	5	14.3213	1345.22	33.5935	36.0589	nan	nan	nan
28/03/2018 11:20	nan	178.44	-49.0026	11.851	nan	nan	33.7208	12.2077	12.9445	25.2741	13.0521	325.452	263.831	13.66	5	12.3503	1343.09	25.3812	26.8378	nan	nan	nan
28/03/2018 11:30	nan	178.469	-49.0294	12.123	nan	nan	33.7205	12.3992	13.1482	25.2717	13.1248	323.745	262.479	16.38	5	14.8095	1328.63	36.0336	38.7993	nan	nan	nan
28/03/2018 11:40	nan	178.498	-49.0558	12.141	nan	nan	33.7222	12.4815	13.4074	25.2692	13.4324	321.291	260.617	14.73	5	13.3177	1310.52	29.6426	31.5923	nan	nan	nan
28/03/2018 11:50	nan	178.527	-49.0822	11.687	nan	nan	33.7186	12.4468	13.462	25.2627	13.5549	320.76	260.243	15.55	5	14.0591	1306.75	32.9058	35.2584	nan	nan	nan
28/03/2018 12:00	nan	178.556	-49.1085	11.766	nan	nan	33.7178	12.3816	13.3569	25.251	13.4787	321.581	260.879	17.2	5	15.5509	1314.03	39.7766	43.0183	nan	nan	nan
28/03/2018 12:10	nan	178.584	-49.1352	11.832	nan	nan	33.7172	12.3108	13.2497	25.2314	13.3602	322.864	261.871	17.7	5	16.0029	1321.5	41.8992	45.4267	nan	nan	nan
28/03/2018 12:20	nan	178.613	-49.1617	11.729	nan	nan	33.7214	12.1716	13.1741	25.2116	13.2938	323.746	262.55	17.58	5	15.8944	1326.81	41.2744	44.7231	nan	nan	nan
28/03/2018 12:30	nan	178.642	-49.1883	11.991	nan	nan	33.7183	12.2764	12.9914	25.1898	13.1224	325.434	263.851	17.55	5	15.8673	1339.74	40.9406	44.355	nan	nan	nan
28/03/2018 12:40	nan	178.67	-49.2154	11.838	nan	nan	33.7311	12.3035	13.184	25.1662	13.172	325.343	263.778	16.67	5	15.0717	1326.11	37.2964	40.2235	nan	nan	nan
28/03/2018 12:50	nan	178.697	-49.2428	12.121	nan	nan	33.7271	12.3105	13.2393	25.1466	13.352	324.436	263.126	16.13	5	14.5835	1322.23	35.0764	37.715	nan	nan	nan
28/03/2018 13:00	0.044462	178.723	-49.2707	11.926	nan	nan	33.739	12.3946	13.2204	25.1249	13.2821	323.223	262.093	16.15	5	14.6016	1323.56	35.1418	37.7897	nan	nan	nan
28/03/2018 13:10	nan	178.75	-49.2991	12.011	nan	nan	33.7427	12.2236	13.353	25.1061	13.4217	321.866	261.045	16.87	5	15.2525	1314.3	38.3269	41.3792	nan	nan	nan
28/03/2018 13:20	nan	178.776	-49.3277	11.946	nan	nan	33.7226	12.0637	13.0797	25.0853	13.271	324.716	263.325	16.67	5	15.0717	1333.47	37.1934	40.1124	nan	nan	nan
28/03/2018 13:30	nan	178.802	-49.356	12.191	nan	nan	33.7261	12.2514	12.8589	25.0677	12.9753	326.456	264.604	16.02	5	14.484	1349.23	34.2737	36.8282	nan	nan	nan
28/03/2018 13:40	nan	178.832	-49.3834	12.106	nan	nan	33.7518	12.2405	13.19	25.0522	13.142	322.586	261.496	14.42	5	13.0374	1325.69	28.3065	30.1029	nan	nan	nan
28/03/2018 13:50	nan	178.862	-49.4104	12.299	nan	nan	33.7253	12.125	13.1829	25.0412	13.3682	321.644	260.871	14.53	5	13.1369	1326.19	28.7122	30.5582	nan	nan	nan
28/03/2018 14:00	nan	178.892	-49.4379	12.113	nan	nan	33.7243	12.6858	12.9417	25.0267	12.9358	327.34	265.306	15.07	5	13.6251	1343.29	30.5761	32.6618	nan	nan	nan
28/03/2018 14:10	nan	178.924	-49.4654	12.293	nan	nan	33.7712	12.9025	13.8454	25.0168	13.7273	316.899	257.098	15.6	5	14.1043	1280.66	33.4432	35.8453	nan	nan	nan
28/03/2018 14:20	nan	178.955	-49.4926	12.501	nan	nan	33.7754	12.9528	14.0167	25.0085	14.0692	315.438	256.047	15.33	5	13.8602	1269.21	32.4957	34.7709	nan	nan	nan
28/03/2018 14:30	nan	178.986	-49.5209	12.658	nan	nan	33.7773	12.8861	13.9803	24.9997	14.0974	315.13	255.805	14.95	5	13.5166	1271.64	30.9519	33.037	nan	nan	nan
28/03/2018 14:40	nan	179.016	-49.5496	12.446	nan	nan	33.7709	12.4144	13.8281	24.9896	13.9682	316.222	256.649	15.77	5	14.258	1281.82	34.1251	36.6142	nan	nan	nan
28/03/2018 14:50	nan	179.046	-49.5781	12.274	nan	nan	33.7512	11.9672	13.146	24.9782	13.465	321.896	261.074	16.38	5	14.8095	1328.79	36.0315	38.7971	nan	nan	nan
28/03/2018 15:00	nan	179.075	-49.6062	12.376	nan	nan	33.7638	11.6042	12.6047	24.9639	12.8584	326.138	264.234	16.23	5	14.6739	1367.67	34.8978	37.5444	nan	nan	nan
28/03/2018 15:10	nan	179.105	-49.6343	12.402	nan	nan	33.7857	11.3791	12.2384	24.9484	12.4313	328.754	266.13	15.59	5	14.0952	1394.82	32.0062	34.303	nan	nan	nan
28/03/2018 15:20	nan	179.135	-49.6626	12.544	nan	nan	33.8088	11.3073	12.0388	24.9328	12.1713	330.286	267.217	14.11	5	12.7571	1409.91	26.3402	27.9484	nan	nan	nan
28/03/2018 15:30	nan	179.165	-49.6908	12.237	nan	nan	33.8156	11.3013	12.0493	24.9226	12.1327	330.449	267.321	14.56	5	13.164	1409.11	27.9638	29.768	nan	nan	nan
28/03/2018 15:40	nan	179.195	-49.7187	12.328	nan	nan	33.8241	11.2754	12.1011	24.9063	12.1765	329.578	266.621	15.62	5	14.1224	1405.18	32.005	34.308	nan	nan	nan
28/03/2018 15:50	nan	179.225	-49.7471	12.295	nan	nan	33.816	11.1877	12.1054	24.8899	12.2046	329.218	266.356	15.2	5	13.7426	1404.85	30.3909	32.4916	nan	nan	nan
28/03/2018 16:00	nan	179.254	-49.7756	12.515	nan	nan	33.7857	11.1842	11.9909	24.869	12.116	330.557	267.451	15.58	5	14.0862	1413.56	31.7545	34.0311	nan	nan	nan
28/03/2018 16:10	nan	179.283	-49.8037	12.447	nan	nan	33.7977	11.1466	12.0126	24.85	12.0935	330.688	267.526	16.61	5	15.0175	1411.9	35.8976	38.7022	nan	nan	nan
28/03/2018 16:20	nan	179.312	-49.8316	12.671	nan	nan	33.7932	11.0919	11.9931	24.8218	12.103	330.989	267.782	17.59	5	15.9035	1413.39	40.0337	43.381	nan	nan	nan
28/03/2018 16:30	nan	179.343	-49.8593	12.088	nan	nan	33.7879	11.1153	11.9266	24.7862	12.028	331.568	268.226	17.55	5	15.8673	1418.48	39.7881	43.1064	nan	nan	nan
28/03/2018 16:40	nan	179.373	-49.8868	12.302	nan	nan	33.807	11.196	11.9714	24.7557	12.0353	331.039	267.77	17.57	5	15.8854	1415.05	39.9232	43.2569	nan	nan	nan
28/03/2018 16:50	nan	179.403	-49.9145	12.209	nan	nan	33.8132	11.2392	12.1085	24.7288	12.1605	329.66	266.699	17.52	5	15.8402	1404.62	39.8533	43.1706	nan	nan	nan
28/03/2018 17:00	nan	179.434	-49.9422	12.308	nan	nan	33.8032	11.2237	12.1605	24.6951	12.2444	328.999	266.217	18.17	5	16.4279	1400.68	42.7926	46.4985	nan	nan	nan
28/03/2018 17:10	nan	179.462	-49.9705	12.265	nan	nan	33.7587	11.2286	12.1193	24.6537	12.2147	329.301	266.523	18.27	5	16.5183	1403.8	43.1971	46.9595	nan	nan	nan
28/03/2018 17:20	nan	179.491	-49.9989	12.429	nan	nan	33.758	11.17	12.1293	24.6231	12.2189	328.893	266.196	17.23	5	15.578	1403.04	38.6226	41.7767	nan	nan	nan
28/03/2018 17:30	nan	179.521	-50.027	12.383	nan	nan	33.7673	11.1202	12.043	24.5913	12.1732	330.006	267.061	17.07	5	15.4333	1409.59	37.8516	40.909	nan	nan	nan
28/03/2018 17:40	nan	179.551	-50.055	12.267	nan	nan	33.8069	11.0046	11.9777	24.5625	12.0706	330.129	267.049	17	5	15.3701	1414.57	37.4894	40.5028	nan	nan	nan
28/03/2018 17:50	nan	179.581	-50.083	12.3	nan	nan	33.7811	10.9118	11.8371	24.5384	11.9892	329.599	266.627	16.84	5	15.2254	1425.37	36.6784	39.5931	nan	nan	nan
28/03/2018 18:00	nan	179.611	-50.1109	12.124	nan	nan	33.7199	10.7366	11.7287	24.5126	11.852	329.732	266.778	16.98	5	15.352	1433.78	37.1538	40.136	nan	nan	nan
28/03/2018 18:10	nan	179.64	-50.1391	12.482	nan	nan	33.6773	10.6247	11.5137	24.4861	11.6736	331.188	267.948	17.06	5	15.4243	1450.63	37.2706	40.279	nan	nan	nan
28/03/2018 18:20	nan	179.669	-50.1674	12.114	nan	nan	33.6992	10.5798	11.3874	24.4552	11.4991	332.586	268.964	19.86	5	17.9558	1460.65	49.7063	54.3981	nan	nan	nan
28/03/2018 18:30	nan	179.699	-50.1958	12.365	nan	nan	33.7057	11.1982	11.3982	24.4305	11.487	332.379	268.78	17.45	5	15.7769	1459.79	38.7946	42.0092	nan	nan	nan
28/03/2018 18:40	nan	179.73	-50.2243	12.57	nan	nan	33.7559	11.874	12.3309	24.3989	12.0249	325.439	263.32	18.33	5	16.5725	1387.9	43.7178	47.5384	nan	nan	nan
28/03/2018 18:50	nan	179.761	-50.2533	12.77	nan	nan	33.8208	12.2421	13.2434	24.3641	13.14	314.35	254.709	18.07	5	16.3375	1321.95	43.5852	47.3378	nan	nan	nan
28/03/2018 19:00	nan	179.792	-50.2821	12.742	nan	nan	33.8412	12.3428	13.5368	24.331	13.5601	312.131	253.052	17.87	5	16.1566	1301.61	42.998	46.6561	nan	nan	nan
28/03/2018 19:10	nan	179.823	-50.3106	12.235	nan	nan	33.7972	12.4766	13.4913	24.2889	13.5935	313.17	253.977	18.17	0	16.4279	1304.73	44.3382	48.1779	nan	nan	nan
28/03/2018 19:20	nan	179.853	-50.3387	12.365	nan	nan	33.8045	12.5712	13.5971	24.2639	13.6238	314.12	254.748	18.59	0	16.8076	1297.48	46.4533	50.5717	nan	nan	nan
28/03/2018 19:30	nan	179.883	-50.3666	12.397	nan	nan	33.8217	12.6415	13.675	24.2416	13.7475	313.661	254.4	19.4	0	17.5399	1292.17	50.52	55.1878	nan	nan	nan
28/03/2018 19:40	nan	179.912	-50.3944	12.048	nan	nan	33.8438	12.6346	13.7172	24.2116	13.7799	313.305	254.09	20.02	0	18.1005	1289.3	53.729	58.8369	nan	nan	nan
28/03/2018 19:50	nan	179.942	-50.4222	12.27	nan	nan	33.8483	12.6101	13.6776	24.1638	13.7908	313.478	254.227	19.47	0	17.6032	1291.99	50.8742	55.5905	nan	nan	nan
28/03/2018 20:00	nan	179.972	-50.4498	12.084	nan	nan	33.8471	12.6132	13.6324	24.1175	13.7146	313.716	254.39	18.7	0	16.9071	1295.07	47.0257	51.2195	nan	nan	nan
28/03/2018 20:10	nan	-179.999	-50.4774	12.301	nan	nan	33.8581	12.6078	13.6418	24.0722	13.7205	313.322	254.057	18.33	0	16.5725	1294.43	45.2687	49.225	nan	nan	nan
28/03/2018 20:20	nan	-179.969	-50.505	12.049	nan	nan	33.8599	12.5701	13.6333	24.0278	13.7242	313.228	253.979	17.44	0	15.7679	1295.01	41.1438	44.5508	nan	nan	nan
28/03/2018 20:30	nan	-179.94	-50.5323	12.212	nan	nan	33.8416	12.5293	13.5779	23.9888	13.68	313.767	254.426	18.67	0	16.8799	1298.79	46.8138	50.9821	nan	nan	nan
28/03/2018 20:40	nan	-179.911	-50.5596	12.074	nan	nan	33.8297	12.5063	13.5291	23.9462	13.6179	314.071	254.666	18.85	0	17.0427	1302.13	47.6224	51.9032	nan	nan	nan
28/03/2018 20:50	nan	-179.881	-50.5873	12.123	nan	nan	33.8271	12.4929	13.515	23.9063	13.6016	314.15	254.728	19.21	0	17.3682	1303.11	49.3653	53.8845	nan	nan	nan
28/03/2018 21:00	nan	-179.851	-50.615	12.059	nan	nan	33.8241	12.5086	13.5038	23.8629	13.5885	314.165	254.74	19.31	0	17.4586	1303.87	49.8455	54.4309	nan	nan	nan
28/03/2018 21:10	nan	-179.821	-50.6421	12.218	nan	nan	33.8219	12.5032	13.5355	23.8205	13.6029	314.61	255.109	19.44	0	17.5761	1301.7	50.5343	55.2124	nan	nan	nan
28/03/2018 21:20	nan	-179.792	-50.6697	12.119	nan	nan	33.8193	12.5008	13.5411	23.775	13.6225	314.966	255.411	19.25	0	17.4043	1301.31	49.5972	54.1465	nan	nan	nan
28/03/2018 21:30	nan	-179.763	-50.6973	11.967	nan	nan	33.8186	12.498	13.534	23.7352	13.6129	315.201	255.598	18.77	0	16.9704	1301.8	47.2413	51.4701	nan	nan	nan
28/03/2018 21:40	nan	-179.732	-50.7244	12.151	nan	nan	33.8255	12.4161	13.533	23.701	13.6181	314.881	255.33	18.58	0	16.7986	1301.87	46.3271	50.4321	nan	nan	nan
28/03/2018 21:50	nan	-179.702	-50.7515	12.209	nan	nan	33.8221	12.2702	13.414	23.6688	13.5438	314.938	255.351	17.88	0	16.1657	1310.07	42.9048	46.5572	nan	nan	nan
28/03/2018 22:00	nan	-179.672	-50.779	11.895	nan	nan	33.8163	12.1592	13.2143	23.6396	13.3573	316.471	256.526	17.5	0	15.8221	1323.98	40.9593	44.3643	nan	nan	nan
28/03/2018 22:10	nan	-179.644	-50.8067	12.2	nan	nan	33.8116	12.1557	13.0935	23.6104	13.1937	319.113	258.606	18.56	0	16.7805	1332.5	45.697	49.7418	nan	nan	nan
28/03/2018 22:20	nan	-179.615	-50.8342	12.02	nan	nan	33.8177	12.1354	13.1339	23.5777	13.2016	319.378	258.814	18.42	0	16.6539	1329.64	45.0867	49.0469	nan	nan	nan
28/03/2018 22:30	nan	-179.585	-50.8622	12.232	nan	nan	33.8187	12.1166	13.125	23.5491	13.2067	319.318	258.766	18.17	0	16.4279	1330.27	43.9106	47.7132	nan	nan	nan
28/03/2018 22:40	nan	-179.556	-50.8904	12.039	nan	nan	33.8168	12.1023	13.1051	23.524	13.193	319.538	258.942	18.07	0	16.3375	1331.68	43.4257	47.1646	nan	nan	nan
28/03/2018 22:50	nan	-179.527	-50.9182	12.315	nan	nan	33.8155	12.1189	13.0782	23.5007	13.1581	319.441	258.85	18.79	0	16.9884	1333.58	46.7706	50.9616	nan	nan	nan
28/03/2018 23:00	nan	-179.496	-50.9459	12.472	nan	nan	33.8237	12.1706	13.1145	23.4771	13.1781	319.172	258.628	18.12	0	16.3827	1331.01	43.6672	47.4378	nan	nan	nan
28/03/2018 23:10	nan	-179.465	-50.9734	12.22	nan	nan	33.8347	12.2053	13.1919	23.4606	13.2433	318.451	258.053	17.07	0	15.4333	1325.56	39.033	42.1858	nan	nan	nan
28/03/2018 23:20	nan	-179.434	-51.0011	12.106	nan	nan	33.8345	12.3025	13.2274	23.4509	13.2888	318.307	257.956	18.23	0	16.4821	1323.06	44.309	48.1595	nan	nan	nan
28/03/2018 23:30	nan	-179.404	-51.0287	12.316	nan	nan	33.8462	12.3939	13.3483	23.444	13.3807	317.779	257.547	16.64	0	15.0446	1314.62	37.3305	40.2536	nan	nan	nan
28/03/2018 23:40	nan	-179.373	-51.0562	12.266	nan	nan	33.8556	12.3426	13.4553	23.4376	13.5123	316.566	256.604	18.92	0	17.106	1307.22	47.869	52.1876	nan	nan	nan
28/03/2018 23:50	nan	-179.343	-51.0838	12.001	nan	nan	33.8509	12.3282	13.3405	23.4289	13.4563	317.321	257.2	17.43	0	15.7588	1315.17	40.7825	44.1574	nan	nan	nan
29/03/2018 00:00	nan	-179.312	-51.1114	12.143	nan	nan	33.8682	12.3909	13.308	23.425	13.3691	316.756	256.678	18.55	0	16.7714	1317.43	45.9101	49.9715	nan	nan	nan
29/03/2018 00:10	nan	-179.282	-51.1391	12.364	nan	nan	33.8878	12.4394	13.398	23.4199	13.442	316.278	256.291	18.04	0	16.3103	1311.17	43.6248	47.3742	nan	nan	nan
29/03/2018 00:20	nan	-179.253	-51.1669	12.36	nan	nan	33.8771	12.4232	13.4556	23.413	13.5239	316.676	256.664	18.22	0	16.4731	1307.19	44.5304	48.3978	nan	nan	nan
29/03/2018 00:30	nan	-179.223	-51.1954	12.285	nan	nan	33.8571	12.4143	13.4131	23.411	13.5	316.505	256.548	18.65	0	16.8619	1310.13	46.515	50.6523	nan	nan	nan
29/03/2018 00:40	nan	-179.194	-51.2235	12.164	nan	nan	33.8518	12.4052	13.3964	23.415	13.4777	316.72	256.72	18.1	0	16.3646	1311.29	43.9013	47.6877	nan	nan	nan
29/03/2018 00:50	nan	-179.164	-51.2506	11.809	nan	nan	33.8554	12.4187	13.3816	23.4181	13.4546	316.684	256.676	17.88	0	16.1657	1312.31	42.8681	46.5173	nan	nan	nan
29/03/2018 01:00	6.3669	-179.134	-51.2779	11.944	0.985414	nan	33.856	12.4357	13.3989	23.427	13.4641	316.937	256.884	16.64	0	15.0446	1311.12	37.3804	40.3074	nan	nan	nan
29/03/2018 01:10	nan	-179.105	-51.3049	11.76	0.79201	nan	33.8544	12.4708	13.413	23.4409	13.4849	316.729	256.727	18.05	0	16.3194	1310.14	43.6885	47.4455	nan	nan	nan
29/03/2018 01:20	0.0968429	-179.076	-51.3323	12.039	2.77712	nan	33.856	12.5053	13.4573	23.4517	13.5138	316.155	256.271	17.25	0	15.5961	1307.08	40.1042	43.3836	nan	nan	nan
29/03/2018 01:30	nan	-179.046	-51.359	11.625	2.2373	nan	33.8553	12.5266	13.495	23.4627	13.5606	315.643	255.877	18.25	0	16.5002	1304.48	44.7175	48.6078	nan	nan	nan
29/03/2018 01:40	nan	-179.015	-51.3852	11.713	1.61685	nan	33.8541	12.6349	13.5081	23.4648	13.5646	315.372	255.66	18.02	0	16.2923	1303.58	43.6589	47.4067	nan	nan	nan
29/03/2018 01:50	nan	-178.985	-51.4117	11.682	1.68834	nan	33.8644	12.6131	13.6636	23.4759	13.7005	314.2	254.75	17.77	5	16.0662	1292.95	42.6807	46.2896	nan	nan	nan
29/03/2018 02:00	nan	-178.956	-51.4384	11.826	1.76364	nan	33.8964	12.3857	13.5994	23.4817	13.7056	315.484	255.742	18.09	5	16.3556	1297.32	44.0903	47.8908	nan	nan	nan
29/03/2018 02:10	nan	-178.927	-51.4654	11.573	2.18618	nan	33.8764	12.2177	13.2709	23.4905	13.4627	317.295	257.141	16.96	5	15.3339	1320.02	38.6345	41.7311	nan	nan	nan
29/03/2018 02:20	nan	-178.899	-51.4919	11.57	2.03861	nan	33.8581	12.0937	13.0615	23.4973	13.1734	320.066	259.294	17.61	5	15.9216	1334.76	41.2857	44.742	nan	nan	nan
29/03/2018 02:30	nan	-178.87	-51.5186	11.681	1.54855	nan	33.8466	12.0223	12.9364	23.5037	13.0414	319.529	258.822	16.98	5	15.352	1343.67	38.3794	41.4599	nan	nan	nan
29/03/2018 02:40	nan	-178.841	-51.5456	11.745	0.982883	nan	33.8417	11.9733	12.8891	23.5153	12.9782	319.554	258.824	16.48	5	14.8999	1347.06	36.2044	39.005	nan	nan	nan
29/03/2018 02:50	nan	-178.812	-51.5721	11.819	1.39475	nan	33.8304	12.1125	12.8534	23.5274	12.9214	319.377	258.675	16.11	5	14.5654	1349.62	34.6366	37.2378	nan	nan	nan
29/03/2018 03:00	nan	-178.781	-51.5985	12.187	2.10899	nan	33.8121	12.2206	13.0821	23.5403	13.0771	319.321	258.724	17.24	5	15.587	1333.3	39.6639	42.9052	nan	nan	nan
29/03/2018 03:10	nan	-178.752	-51.6259	12.043	1.11804	nan	33.8126	12.2018	13.2334	23.5551	13.2924	316.717	256.704	16.77	5	15.1621	1322.64	37.7743	40.7609	nan	nan	nan
29/03/2018 03:20	nan	-178.722	-51.6534	11.991	1.10105	nan	33.8188	12.3028	13.1576	23.5604	13.2218	316.969	256.868	17.84	5	16.1295	1327.97	42.4323	46.0357	nan	nan	nan
29/03/2018 03:30	nan	-178.692	-51.6806	12.074	nan	nan	33.8136	12.3359	13.3065	23.5515	13.3617	315.038	255.37	19.04	5	17.2145	1317.54	48.2635	52.6443	nan	nan	nan
29/03/2018 03:40	nan	-178.662	-51.708	12.21	nan	nan	33.819	12.3656	13.3255	23.5472	13.4022	314.822	255.203	17.72	5	16.021	1316.21	42.0742	45.6209	nan	nan	nan
29/03/2018 03:50	nan	-178.631	-51.7352	11.931	nan	nan	33.8182	12.3774	13.3485	23.546	13.4117	314.782	255.176	15.91	5	14.3846	1314.61	34.2691	36.7994	nan	nan	nan
29/03/2018 04:00	nan	-178.601	-51.7625	11.988	nan	nan	33.8174	12.346	13.3182	23.5494	13.434	314.816	255.214	17.18	5	15.5328	1316.72	39.6476	42.8744	nan	nan	nan
29/03/2018 04:10	nan	-178.571	-51.7895	11.664	nan	nan	33.8179	12.328	12.868	23.5537	13.0642	315.869	255.913	17.75	5	16.0481	1348.58	41.7011	45.2229	nan	nan	nan
29/03/2018 04:20	nan	-178.541	-51.8164	12.219	nan	nan	33.8186	12.3193	12.8058	23.5457	12.8965	315.599	255.624	18.43	0	16.663	1353.05	44.7414	48.6735	nan	nan	nan
29/03/2018 04:30	nan	-178.511	-51.8435	11.932	nan	nan	33.8183	12.3224	12.7943	23.5358	12.8746	315.588	255.606	16.31	0	14.7462	1353.88	35.4056	38.1081	nan	nan	nan
29/03/2018 04:40	nan	-178.481	-51.8707	11.922	nan	nan	33.8156	12.3193	12.8012	23.5305	12.881	315.396	255.457	17.29	0	15.6323	1353.39	39.5871	42.8329	nan	nan	nan
29/03/2018 04:50	nan	-178.451	-51.8982	12.163	nan	nan	33.8155	12.3145	12.7997	23.5284	12.8842	315.153	255.262	16.77	0	15.1621	1353.5	37.3413	40.2936	nan	nan	nan
29/03/2018 05:00	nan	-178.421	-51.9256	12.023	nan	nan	33.8173	12.2917	12.7879	23.5332	12.8713	316.225	256.122	16.76	0	15.1531	1354.35	37.2871	40.2329	nan	nan	nan
29/03/2018 05:10	nan	-178.392	-51.953	11.819	nan	nan	33.8235	12.2382	12.751	23.5375	12.8412	316.635	256.431	16.15	0	14.6016	1357.01	34.7059	37.3209	nan	nan	nan
29/03/2018 05:20	nan	-178.361	-51.98	11.797	nan	nan	33.8312	12.1467	12.6726	23.544	12.7836	316.502	256.287	15.62	0	14.1224	1362.71	32.4998	34.8384	nan	nan	nan
29/03/2018 05:30	nan	-178.331	-52.007	12.089	nan	nan	33.8509	12.0609	12.5501	23.5521	12.6673	317.932	257.364	14.89	0	13.4624	1371.67	29.575	31.5546	nan	nan	nan
29/03/2018 05:40	nan	-178.301	-52.0343	12.152	nan	nan	33.8654	12.0718	12.4485	23.5664	12.547	318.741	257.945	14.32	0	12.947	1379.16	27.3885	29.1056	nan	nan	nan
29/03/2018 05:50	nan	-178.271	-52.0614	11.856	nan	nan	33.8594	12.1364	12.4935	23.5814	12.552	318.59	257.835	14	0	12.6577	1375.84	26.2719	27.853	nan	nan	nan
29/03/2018 06:00	nan	-178.241	-52.089	12.235	nan	nan	33.8509	12.1894	12.5993	23.59	12.6523	318.227	257.597	14.89	0	13.4624	1368.06	29.614	31.5962	nan	nan	nan
29/03/2018 06:10	nan	-178.21	-52.1168	12.297	nan	nan	33.8426	12.2557	12.659	23.6004	12.7195	317.428	256.991	14.29	0	12.9199	1363.7	27.4341	29.1477	nan	nan	nan
29/03/2018 06:20	nan	-178.178	-52.1444	12.187	nan	nan	33.8419	12.2921	12.7396	23.6165	12.79	316.497	256.268	14.32	0	12.947	1357.84	27.6027	29.3332	nan	nan	nan
29/03/2018 06:30	nan	-178.146	-52.1722	12.36	nan	nan	33.8412	12.313	12.7677	23.6375	12.8476	316.152	256.014	14.49	0	13.1007	1355.81	28.2487	30.0564	nan	nan	nan
29/03/2018 06:40	nan	-178.115	-52.2003	12.357	nan	nan	33.8405	12.246	12.7734	23.6483	12.848	315.437	255.437	14.62	0	13.2183	1355.39	28.736	30.6028	nan	nan	nan
29/03/2018 06:50	nan	-178.083	-52.229	12.531	nan	nan	33.8486	11.9091	12.6651	23.6544	12.7925	315.971	255.833	15.19	0	13.7336	1363.26	30.8125	32.9401	nan	nan	nan
29/03/2018 07:00	nan	-178.052	-52.2577	12.73	nan	nan	33.8229	11.4546	12.1751	23.6577	12.4842	320.467	259.384	15.34	5	13.8692	1399.58	30.9837	33.1551	nan	nan	nan
29/03/2018 07:10	nan	-178.02	-52.2863	12.304	nan	nan	33.7569	11.408	11.6819	23.6688	11.7681	325.947	263.617	13.16	5	11.8982	1437.42	22.8647	24.0779	nan	nan	nan
29/03/2018 07:20	nan	-177.988	-52.3151	12.695	nan	nan	33.7782	11.2561	11.8262	23.6791	11.9365	325.988	263.689	14.66	5	13.2544	1426.22	28.1591	29.9967	nan	nan	nan
29/03/2018 07:30	nan	-177.956	-52.344	12.559	nan	nan	33.7479	11.0735	11.6051	23.6894	11.7586	326.703	264.239	13.8	5	12.4769	1443.43	24.9601	26.4216	nan	nan	nan
29/03/2018 07:40	nan	-177.924	-52.3729	12.616	nan	nan	33.7138	10.9799	11.3805	23.6971	11.5125	328.001	265.238	12.86	0	11.627	1461.2	21.7123	22.8048	nan	nan	nan
29/03/2018 07:50	nan	-177.893	-52.4017	12.276	nan	nan	33.7053	10.9479	11.3194	23.7096	11.4215	328.504	265.619	12.75	0	11.5275	1466.08	21.328	22.379	nan	nan	nan
29/03/2018 08:00	nan	-177.861	-52.4299	12.537	nan	nan	33.7124	10.9868	11.3184	23.7164	11.387	328.577	265.651	12.72	0	11.5004	1466.16	21.2329	22.2732	nan	nan	nan
29/03/2018 08:10	nan	-177.829	-52.4582	12.437	nan	nan	33.7341	10.967	11.4139	23.7269	11.4813	327.557	264.831	12.61	0	11.401	1458.54	20.9427	21.9467	nan	nan	nan
29/03/2018 08:20	nan	-177.798	-52.486	12.306	nan	nan	33.7278	10.9854	11.3864	23.7374	11.4728	327.973	265.175	12.12	0	10.9579	1460.73	19.4231	20.2591	nan	nan	nan
29/03/2018 08:30	nan	-177.766	-52.5142	12.398	nan	nan	33.7361	11.0074	11.4183	23.7527	11.4899	327.718	264.962	11.79	0	10.6596	1458.19	18.4578	19.1875	nan	nan	nan
29/03/2018 08:40	nan	-177.735	-52.5421	12.113	nan	nan	33.7355	10.9812	11.4491	23.7677	11.5316	327.582	264.872	11.4	0	10.307	1455.74	17.3443	17.9542	nan	nan	nan
29/03/2018 08:50	nan	-177.704	-52.5701	12.066	nan	nan	33.7293	11.0546	11.3965	23.7823	11.4908	328.393	265.519	10.87	0	9.8278	1459.92	15.844	16.3002	nan	nan	nan
29/03/2018 09:00	nan	-177.674	-52.5978	11.964	nan	nan	33.7482	11.1835	11.5069	23.7993	11.5482	327.485	264.779	11.18	0	10.1081	1451.16	16.7494	17.2951	nan	nan	nan
29/03/2018 09:10	nan	-177.643	-52.6251	12.075	nan	nan	33.7783	11.5015	11.6739	23.8179	11.6834	326.267	263.803	11.75	0	10.6234	1438.05	18.4685	19.1906	nan	nan	nan
29/03/2018 09:20	nan	-177.613	-52.6527	11.949	nan	nan	33.8542	11.834	12.1194	23.8391	12.0786	321.985	260.387	10.8	0	9.76451	1403.79	15.9639	16.4095	nan	nan	nan
29/03/2018 09:30	nan	-177.582	-52.6799	11.873	nan	nan	33.8836	12.0151	12.5088	23.861	12.4834	318.855	257.981	10.73	0	9.70122	1374.71	15.9373	16.3679	nan	nan	nan
29/03/2018 09:40	nan	-177.55	-52.7064	11.984	nan	nan	33.9071	12.1702	12.6454	23.8865	12.6956	317.501	256.937	10.17	0	9.19491	1364.69	14.4756	14.7579	nan	nan	nan
29/03/2018 09:50	nan	-177.517	-52.733	12.109	nan	nan	33.9251	12.1784	12.7775	23.9105	12.8183	316.516	256.163	9.53	0	8.61627	1355.1	12.8761	13.0047	nan	nan	nan
29/03/2018 10:00	nan	-177.483	-52.7597	12.17	nan	nan	33.8959	12.1889	12.7133	23.9361	12.8429	316.942	256.564	10.2	0	9.22204	1359.75	14.5815	14.872	nan	nan	nan
29/03/2018 10:10	nan	-177.449	-52.7865	12.001	nan	nan	33.8977	12.1779	12.6857	23.9631	12.7598	317.844	257.257	10.92	0	9.873	1361.76	16.5464	17.0331	nan	nan	nan
29/03/2018 10:20	nan	-177.42	-52.8148	12.201	nan	nan	33.899	12.1115	12.6583	23.9838	12.7655	316.429	256.112	11.78	0	10.6505	1363.75	19.0558	19.8071	nan	nan	nan
29/03/2018 10:30	nan	-177.391	-52.8431	12.162	nan	nan	33.8822	12.0403	12.5558	24.0034	12.665	316.6	256.235	11.65	0	10.533	1371.25	18.6121	19.3193	nan	nan	nan
29/03/2018 10:40	nan	-177.361	-52.8713	12.185	nan	nan	33.8637	11.9325	12.4642	24.0282	12.5887	317.66	257.091	11.66	0	10.5421	1378	18.5964	19.3051	nan	nan	nan
29/03/2018 10:50	nan	-177.331	-52.8989	12.198	nan	nan	33.8294	11.8994	12.3216	24.053	12.4456	319.65	258.696	10.67	0	9.64697	1388.59	15.6924	16.1043	nan	nan	nan
29/03/2018 11:00	nan	-177.3	-52.927	12.114	nan	nan	33.8328	12.1433	12.3003	24.0746	12.3765	319.702	258.703	9.98	5	9.02313	1390.18	13.8482	14.0807	nan	nan	nan
29/03/2018 11:10	nan	-177.269	-52.9551	12.29	nan	nan	33.9331	12.3575	12.6734	24.1002	12.6125	317.518	256.874	9.49	5	8.58011	1362.65	12.7407	12.8599	nan	nan	nan
29/03/2018 11:20	nan	-177.237	-52.9827	12.166	nan	nan	33.9698	12.3148	12.9527	24.1221	12.9937	314.92	254.873	10.54	5	9.52944	1342.5	15.5988	15.9817	nan	nan	nan
29/03/2018 11:30	nan	-177.205	-53.0102	12.216	nan	nan	33.9547	11.6327	12.8014	24.144	12.9513	312.766	253.137	11.11	5	10.0448	1353.37	17.1414	17.6856	nan	nan	nan
29/03/2018 11:40	nan	-177.175	-53.0384	11.935	nan	nan	33.8359	11.0086	11.8836	24.1626	12.4008	317.163	256.654	10.74	5	9.71026	1421.79	15.6985	16.1246	nan	nan	nan
29/03/2018 11:50	nan	-177.146	-53.0664	11.996	nan	nan	33.8055	10.863	10.9784	24.1787	11.1813	328.394	265.256	9.68	5	8.75189	1493.71	12.6241	12.7796	nan	nan	nan
29/03/2018 12:00	nan	-177.114	-53.0935	12.01	nan	nan	33.8271	10.7721	11.0259	24.1914	11.098	327.163	264.188	8.97	5	8.10997	1489.83	10.98	10.9879	nan	nan	nan
29/03/2018 12:10	nan	-177.082	-53.1198	11.754	nan	nan	33.8078	10.9457	11.0214	24.2083	11.1023	327.356	264.378	9.05	5	8.1823	1490.2	11.1599	11.1834	nan	nan	nan
29/03/2018 12:20	nan	-177.05	-53.1457	11.52	nan	nan	33.8116	11.1995	11.3316	24.2294	11.2962	324.875	262.453	8.27	5	7.47708	1465.1	9.5359	9.41837	nan	nan	nan
29/03/2018 12:30	nan	-177.02	-53.1718	11.647	nan	nan	33.8277	11.2933	11.7124	24.2516	11.6994	321.453	259.837	8.05	0	7.27817	1435.04	9.17114	9.01693	nan	nan	nan
29/03/2018 12:40	nan	-176.99	-53.1983	11.662	nan	nan	33.8309	11.2938	11.782	24.2759	11.8774	321.018	259.557	7.93	0	7.16968	1429.64	8.93961	8.76662	nan	nan	nan
29/03/2018 12:50	nan	-176.961	-53.2252	11.771	nan	nan	33.83	11.2581	11.7265	24.295	11.8284	320.807	259.366	8.31	0	7.51325	1433.95	9.72458	9.61245	nan	nan	nan
29/03/2018 13:00	nan	-176.932	-53.2519	11.873	nan	nan	33.828	11.205	11.6554	24.3158	11.7632	321.824	260.164	6.87	0	6.21131	1439.5	6.86491	6.55703	nan	nan	nan
29/03/2018 13:10	nan	-176.903	-53.2779	11.243	nan	nan	33.8355	11.2796	11.5798	24.3407	11.6838	322.851	260.948	6.96	0	6.29268	1445.42	7.01381	6.71614	nan	nan	nan
29/03/2018 13:20	nan	-176.873	-53.3035	11.268	nan	nan	33.8333	11.2381	11.7103	24.3596	11.7749	321.664	260.031	6.37	0	5.75925	1435.21	6.00107	5.64573	nan	nan	nan
29/03/2018 13:30	nan	-176.843	-53.3293	11.243	nan	nan	33.8256	11.2382	11.6255	24.3792	11.7258	322.161	260.424	6.74	0	6.09378	1441.83	6.62698	6.30611	nan	nan	nan
29/03/2018 13:40	nan	-176.813	-53.3547	11.266	nan	nan	33.8191	11.2491	11.6385	24.3978	11.715	322.481	260.689	7.13	0	6.44638	1440.82	7.33854	7.05949	nan	nan	nan
29/03/2018 13:50	nan	-176.784	-53.3803	11.1	nan	nan	33.8278	11.2676	11.6578	24.4156	11.7439	322.166	260.433	7.71	0	6.97077	1439.3	8.46363	8.25908	nan	nan	nan
29/03/2018 14:00	nan	-176.755	-53.4063	11.453	nan	nan	33.8271	11.2935	11.6786	24.4322	11.7604	322.015	260.318	7.7	0	6.96173	1437.68	8.44838	8.24231	nan	nan	nan
29/03/2018 14:10	nan	-176.726	-53.4318	11.246	nan	nan	33.8292	11.3652	11.7077	24.4479	11.7764	322.118	260.405	7.66	0	6.92557	1435.41	8.3752	8.16335	nan	nan	nan
29/03/2018 14:20	nan	-176.696	-53.457	11.247	nan	nan	33.8446	11.3864	11.8151	24.4587	11.8746	321.229	259.704	8.19	0	7.40475	1427.08	9.49156	9.3593	nan	nan	nan
29/03/2018 14:30	nan	-176.667	-53.4824	11.141	nan	nan	33.8425	11.3208	11.827	24.472	11.9196	320.995	259.537	8.53	0	7.71215	1426.16	10.2301	10.1558	nan	nan	nan
29/03/2018 14:40	nan	-176.638	-53.5075	10.659	nan	nan	33.8257	11.208	11.7206	24.4853	11.8587	321.276	259.766	8.27	0	7.47708	1434.4	9.63741	9.51863	nan	nan	nan
29/03/2018 14:50	nan	-176.609	-53.5329	10.954	nan	nan	33.8097	11.208	11.5522	24.4941	11.6627	322.307	260.541	8.04	0	7.26913	1447.59	9.11055	8.95546	nan	nan	nan
29/03/2018 15:00	nan	-176.58	-53.5581	11.029	nan	nan	33.817	11.2416	11.5959	24.501	11.6668	322.091	260.356	7.77	0	7.02502	1444.15	8.56969	8.37403	nan	nan	nan
29/03/2018 15:10	nan	-176.551	-53.5836	11.294	nan	nan	33.8259	11.305	11.6628	24.5056	11.7213	321.713	260.06	7.73	0	6.98886	1438.91	8.50485	8.3031	nan	nan	nan
29/03/2018 15:20	nan	-176.522	-53.6088	11.235	nan	nan	33.8389	11.2973	11.7624	24.5042	11.8217	321.141	259.619	7.5	0	6.78091	1431.16	8.07144	7.83751	nan	nan	nan
29/03/2018 15:30	nan	-176.492	-53.6342	11.001	nan	nan	33.8359	11.216	11.7406	24.5004	11.8375	320.804	259.358	7.44	0	6.72666	1432.85	7.94971	7.70805	nan	nan	nan
29/03/2018 15:40	nan	-176.462	-53.6595	10.922	nan	nan	33.8224	11.0235	11.6263	24.4975	11.7615	321.815	260.165	7.27	0	6.57296	1441.77	7.59931	7.33702	nan	nan	nan
29/03/2018 15:50	nan	-176.434	-53.6852	11.217	nan	nan	33.7935	10.8846	11.3562	24.4953	11.5261	324.235	262.067	7.12	0	6.43734	1463.14	7.26387	6.9858	nan	nan	nan
29/03/2018 16:00	nan	-176.404	-53.7107	10.938	nan	nan	33.7844	10.7513	11.1988	24.4893	11.3126	325.833	263.28	6.21	0	5.61459	1475.78	5.65439	5.29141	nan	nan	nan
29/03/2018 16:10	nan	-176.375	-53.7367	11.088	nan	nan	33.7751	10.5773	11.0714	24.4824	11.2065	326.572	263.846	6.32	0	5.71405	1486.12	5.81467	5.46143	nan	nan	nan
29/03/2018 16:20	nan	-176.345	-53.7626	11.333	nan	nan	33.7607	10.2592	10.8886	24.4767	11.0457	327.704	264.714	6.89	0	6.22939	1501.11	6.75794	6.4585	nan	nan	nan
29/03/2018 16:30	nan	-176.316	-53.788	10.784	nan	nan	33.7179	10.1403	10.4906	24.467	10.6902	331.64	267.806	6.54	0	5.91295	1534.42	6.08488	5.75549	nan	nan	nan
29/03/2018 16:40	nan	-176.286	-53.8143	12.073	nan	nan	33.7168	9.92863	10.408	24.4557	10.4913	332.932	268.761	6.41	0	5.79542	1541.45	5.85596	5.51632	nan	nan	nan
29/03/2018 16:50	nan	-176.255	-53.8403	10.957	nan	nan	33.6906	9.71433	10.1978	24.4472	10.3783	334.13	269.722	6.5	0	5.87679	1559.54	5.9695	5.63933	nan	nan	nan
29/03/2018 17:00	nan	-176.226	-53.8659	10.823	nan	nan	33.6635	9.56773	9.95377	24.4375	10.0982	336.95	271.917	6.19	0	5.59651	1580.87	5.43178	5.07962	nan	nan	nan
29/03/2018 17:10	nan	-176.197	-53.8909	10.664	nan	nan	33.6491	9.52287	9.82827	24.4312	9.93988	338.323	272.976	6.67	0	6.03049	1591.99	6.18919	5.87733	nan	nan	nan
29/03/2018 17:20	nan	-176.168	-53.916	10.496	nan	nan	33.6505	9.50121	9.83229	24.4263	9.91671	338.65	273.227	6.49	0	5.86775	1591.63	5.89268	5.56502	nan	nan	nan
29/03/2018 17:30	nan	-176.138	-53.9412	10.987	nan	nan	33.6523	9.50332	9.84231	24.4196	9.9271	338.775	273.33	6.59	0	5.95816	1590.74	6.0586	5.73944	nan	nan	nan
29/03/2018 17:40	nan	-176.108	-53.9671	11.52	nan	nan	33.6523	9.46091	9.85715	24.4164	9.9424	338.656	273.241	6.55	0	5.92199	1589.42	5.99511	5.67233	nan	nan	nan
29/03/2018 17:50	nan	-176.078	-53.9928	10.838	nan	nan	33.6441	9.411	9.81977	24.4141	9.9224	338.605	273.205	6.21	0	5.61459	1592.75	5.44281	5.09341	nan	nan	nan
29/03/2018 18:00	nan	-176.048	-54.0183	11.417	nan	nan	33.6254	9.37561	9.7704	24.4116	9.85189	339.125	273.624	6.21	0	5.61459	1597.15	5.4353	5.08638	nan	nan	nan
29/03/2018 18:10	nan	-176.018	-54.0447	11.496	nan	nan	33.6212	9.26705	9.74865	24.4074	9.91717	339.377	273.866	6.99	0	6.31981	1599.1	6.72034	6.44045	nan	nan	nan
29/03/2018 18:20	nan	-175.988	-54.0704	11.272	nan	nan	33.5964	9.17832	9.36821	24.4051	9.52569	340.407	274.558	6.95	0	6.28364	1633.6	6.58036	6.29934	nan	nan	nan
29/03/2018 18:30	nan	-175.958	-54.0963	11.122	nan	nan	33.5824	9.17666	9.27148	24.4024	9.37207	341.426	275.333	6.91	0	6.24748	1642.53	6.49437	6.2101	nan	nan	nan
29/03/2018 18:40	nan	-175.928	-54.1224	11.345	nan	nan	33.5887	9.15953	9.29551	24.3982	9.37646	340.985	274.968	6.81	0	6.15706	1640.3	6.32998	6.03574	nan	nan	nan
29/03/2018 18:50	nan	-175.897	-54.1491	11.218	nan	nan	33.5769	9.22161	9.25941	24.389	9.35482	341.007	274.996	6.3	0	5.69596	1643.64	5.4977	5.16031	nan	nan	nan
29/03/2018 19:00	nan	-175.867	-54.1745	10.9	nan	nan	33.596	9.36789	9.38523	24.38	9.40795	340.23	274.361	6.71	0	6.06665	1632.04	6.17897	5.8746	nan	nan	nan
29/03/2018 19:10	nan	-175.838	-54.2002	10.302	nan	nan	33.6302	9.43596	9.60571	24.3696	9.63741	338.617	273.107	6.32	0	5.71405	1611.95	5.5831	5.24393	nan	nan	nan
29/03/2018 19:20	nan	-175.808	-54.2253	11.405	nan	nan	33.6352	9.44936	9.65869	24.359	9.73852	338.097	272.726	6.31	0	5.705	1607.17	5.57555	5.23512	nan	nan	nan
29/03/2018 19:30	nan	-175.777	-54.2518	11.632	nan	nan	33.6343	9.38522	9.64077	24.3505	9.72741	338.343	272.92	5.53	0	4.99979	1608.79	4.40586	4.01883	nan	nan	nan
29/03/2018 19:40	nan	-175.746	-54.2784	11.661	nan	nan	33.6157	9.32155	9.52762	24.3426	9.67223	338.546	273.091	5.65	0	5.10828	1619.03	4.5621	4.18185	nan	nan	nan
29/03/2018 19:50	nan	-175.715	-54.3043	11.207	nan	nan	33.6062	9.33595	9.43248	24.3332	9.50637	339.78	274.026	4.8	0	4.33978	1627.71	3.4159	3.01018	nan	nan	nan
29/03/2018 20:00	nan	-175.685	-54.3303	11.502	nan	nan	33.617	9.3008	9.49509	24.3178	9.57291	339.361	273.7	4.61	0	4.168	1621.99	3.18979	2.78148	nan	nan	nan
29/03/2018 20:10	nan	-175.654	-54.3567	11.461	nan	nan	33.6129	9.2959	9.46374	24.3011	9.55793	339.793	274.048	5.13	0	4.63814	1624.85	3.84063	3.44134	nan	nan	nan
29/03/2018 20:20	nan	-175.623	-54.3831	11.141	nan	nan	33.6135	9.3117	9.45756	24.2821	9.53669	340.942	274.965	4.99	0	4.51156	1625.41	3.65815	3.2555	nan	nan	nan
29/03/2018 20:30	nan	-175.593	-54.4093	11.688	nan	nan	33.6196	9.35801	9.48882	24.264	9.55924	339.434	273.748	4.76	0	4.30362	1622.56	3.37179	2.96491	nan	nan	nan
29/03/2018 20:40	nan	-175.562	-54.4353	11.194	nan	nan	33.6321	9.40111	9.56794	24.2461	9.62703	338.654	273.129	5.13	0	4.63814	1615.37	3.85189	3.45142	nan	nan	nan
29/03/2018 20:50	nan	-175.531	-54.4616	11.709	nan	nan	33.6342	9.41646	9.60003	24.2263	9.67197	338.363	272.911	5.06	0	4.57485	1612.47	3.76354	3.36089	nan	nan	nan
29/03/2018 21:00	nan	-175.5	-54.4882	12.101	nan	nan	33.6335	9.39886	9.61503	24.2081	9.70115	338.769	273.253	3.59	0	3.24579	1611.11	2.08687	1.69249	nan	nan	nan
29/03/2018 21:10	nan	-175.467	-54.515	12.008	nan	0	33.629	9.36669	9.58372	24.192	9.67686	338.943	273.39	4.03	0	3.64361	1613.94	2.53679	2.13091	1	nan	nan
29/03/2018 21:20	nan	-175.436	-54.5418	11.976	nan	0	33.6213	9.32088	9.53528	24.174	9.63434	339.463	273.803	4.78	0	4.3217	1618.33	3.40094	2.99378	1	nan	nan
29/03/2018 21:30	nan	-175.406	-54.5688	11.77	nan	0	33.6118	9.2893	9.47418	24.1528	9.57451	339.72	274	5.21	0	4.71047	1623.9	3.94765	3.55054	1	nan	nan
29/03/2018 21:40	nan	-175.375	-54.5956	11.322	nan	0	33.6095	9.24364	9.43019	24.133	9.52809	340.279	274.433	4.8	0	4.33978	1627.92	3.41568	3.00999	1	nan	nan
29/03/2018 21:50	nan	-175.343	-54.6226	12.464	nan	0	33.6197	9.28912	9.39702	24.1087	9.48256	340.523	274.59	3.89	0	3.51703	1630.96	2.37591	1.97504	1	nan	nan
29/03/2018 22:00	nan	-175.309	-54.65	12.351	nan	0	33.6416	9.33022	9.47704	24.0873	9.52481	339.587	273.817	3.86	0	3.48991	1623.64	2.35012	1.94908	1	nan	nan
29/03/2018 22:10	nan	-175.275	-54.6773	12.403	nan	0	33.6499	9.2758	9.536	24.065	9.61509	338.543	273.002	3.67	0	3.31812	1618.27	2.1611	1.76484	1	nan	nan
29/03/2018 22:20	nan	-175.242	-54.704	11.792	nan	0	33.6338	9.29761	9.45781	24.0458	9.57155	339.281	273.605	4.26	0	3.85156	1625.39	2.78013	2.37268	1	nan	nan
29/03/2018 22:30	nan	-175.206	-54.7294	12.083	nan	0	33.6461	9.33639	9.47472	24.0289	9.52633	339.334	273.606	4.23	0	3.82443	1623.85	2.74787	2.34049	1	nan	nan
29/03/2018 22:40	nan	-175.168	-54.7533	11.622	nan	0	33.6513	9.30137	9.54494	24.0195	9.62979	338.698	273.132	4.46	0	4.03238	1617.46	3.01638	2.60707	1	nan	nan
29/03/2018 22:50	nan	-175.13	-54.7772	11.507	nan	0	33.6391	9.39833	9.46556	24.0158	9.56845	339.262	273.58	4.74	0	4.28553	1624.68	3.34497	2.93813	1	nan	nan
29/03/2018 23:00	nan	-175.09	-54.8015	12.1	nan	0	33.6684	9.48535	9.59668	24.0173	9.62687	337.902	272.459	5.41	0	4.8913	1612.77	4.23307	3.84156	1	nan	nan
29/03/2018 23:10	nan	-175.051	-54.8258	12.057	nan	0	33.6814	9.48016	9.69274	24.0158	9.7512	336.549	271.403	7.11	0	6.4283	1604.11	6.91971	6.65306	1	nan	nan
29/03/2018 23:20	nan	-175.011	-54.8499	12.185	nan	0	33.675	9.65912	9.66997	24.0062	9.7625	336.569	271.435	7.56	0	6.83516	1606.16	7.73031	7.51707	1	nan	nan
29/03/2018 23:30	nan	-174.972	-54.8741	12.204	nan	0	33.7096	9.66342	9.92276	23.9922	9.91704	335.19	270.334	7.38	0	6.67241	1583.61	7.45139	7.21418	1	nan	nan
29/03/2018 23:40	nan	-174.934	-54.8986	11.903	nan	0	33.6987	9.69413	9.89527	23.9742	10.0189	334.866	270.138	6.88	0	6.22035	1586.04	6.55727	6.26496	1	nan	nan
29/03/2018 23:50	nan	-174.896	-54.9235	12.063	nan	0	33.7055	9.78152	9.90203	23.9534	9.94318	335.138	270.311	6.6	0	5.9672	1585.45	6.08529	5.76648	1	nan	nan
30/03/2018 00:00	nan	-174.857	-54.9481	12.076	nan	0	33.7212	9.85725	10.0411	23.9351	10.0936	333.014	268.64	6.55	0	5.92199	1573.2	6.02594	5.70151	1	nan	nan
30/03/2018 00:10	nan	-174.819	-54.9724	12.277	nan	0	33.7287	9.92009	10.1139	23.9156	10.1653	332.786	268.475	6.44	0	5.82254	1566.83	5.85723	5.52281	1	nan	nan
30/03/2018 00:20	nan	-174.781	-54.9962	11.571	nan	0	33.7356	9.96211	10.1889	23.8961	10.2483	332.275	268.089	6.49	0	5.86775	1560.31	5.95154	5.62061	1	nan	nan
30/03/2018 00:30	nan	-174.742	-55.0205	11.486	nan	0	33.7343	9.95476	10.2213	23.878	10.3015	331.399	267.408	6.15	0	5.56034	1557.51	5.4093	5.05166	1	nan	nan
30/03/2018 00:40	nan	-174.703	-55.0446	11.868	nan	0	33.7182	10.057	10.177	23.8544	10.2532	332.73	268.488	5.92	0	5.3524	1561.34	5.04743	4.67513	1	nan	nan
30/03/2018 00:50	nan	-174.663	-55.0686	11.515	nan	0	33.7056	9.92698	10.3452	23.8306	10.3817	331.819	267.832	6.51	5	5.88583	1546.83	6.01054	5.67988	1	nan	nan
30/03/2018 01:00	nan	-174.624	-55.0926	11.637	nan	0	33.677	9.84969	10.1221	23.8059	10.2926	333.266	269.009	5.84	0	5.28007	1566.12	4.91914	4.54268	1	nan	nan
30/03/2018 01:10	nan	-174.586	-55.117	11.366	nan	0	33.6717	9.82387	10.033	23.7817	10.1177	334.554	269.978	4.96	0	4.48444	1573.91	3.6785	3.26868	1	nan	nan
30/03/2018 01:20	nan	-174.55	-55.1414	11.911	nan	0	33.6747	9.79006	10.0283	23.7584	10.1048	334.489	269.915	4.87	0	4.40307	1574.32	3.56218	3.15072	1	nan	nan
30/03/2018 01:30	nan	-174.512	-55.1657	11.518	nan	0	33.6671	9.87774	9.99589	23.734	10.067	335.077	270.384	4.74	0	4.28553	1577.17	3.39499	2.98206	1	nan	nan
30/03/2018 01:40	nan	-174.473	-55.1896	11.654	nan	0	33.6912	9.90059	10.1375	23.7169	10.1727	333.422	269.056	4.81	0	4.34882	1564.77	3.49657	3.08293	1	nan	nan
30/03/2018 01:50	nan	-174.434	-55.2132	11.96	nan	0	33.6918	9.87861	10.1534	23.701	10.2348	332.835	268.61	5.02	0	4.53869	1563.39	3.76936	3.35949	1	nan	nan
30/03/2018 02:00	nan	-174.394	-55.2371	12.083	nan	0	33.6963	9.864	10.0974	23.6893	10.1894	333.124	268.815	4.53	0	4.09567	1568.27	3.14699	2.7314	1	nan	nan
30/03/2018 02:10	nan	-174.355	-55.261	12.007	nan	0	33.6992	9.87391	10.0742	23.6769	10.1538	333.374	268.995	4.4	0	3.97813	1570.3	2.99054	2.57521	1	nan	nan
30/03/2018 02:20	nan	-174.315	-55.2848	12.235	nan	0	33.7056	9.96623	10.0902	23.6655	10.148	333.316	268.934	4.24	0	3.83347	1568.91	2.80694	2.39239	1	nan	nan
30/03/2018 02:30	nan	-174.276	-55.3092	11.994	nan	0	33.7174	10.0374	10.2199	23.6579	10.257	331.873	267.799	3.72	0	3.36333	1557.62	2.25372	1.84822	1	nan	nan
30/03/2018 02:40	nan	-174.237	-55.334	12.287	nan	0	33.7189	10.0896	10.304	23.6539	10.3551	331.091	267.21	3.38	0	3.05593	1550.37	1.92279	1.52938	1	nan	nan
30/03/2018 02:50	nan	-174.2	-55.3584	11.684	nan	0	33.715	10.0362	10.355	23.6573	10.4298	330.854	267.059	2.81	0	2.54058	1545.99	1.41972	1.05854	1	nan	nan
30/03/2018 03:00	nan	-174.162	-55.3826	11.754	nan	0	33.706	9.91902	10.232	23.6597	10.3467	331.907	267.887	3.27	0	2.95648	1556.58	1.81597	1.42859	1	nan	nan
30/03/2018 03:10	nan	-174.123	-55.4073	11.948	nan	0	33.6935	9.90275	10.07	23.6571	10.1763	333.591	269.19	3.6	0	3.25484	1570.67	2.12349	1.7237	1	nan	nan
30/03/2018 03:20	nan	-174.083	-55.4319	12.272	5.07068	0	33.6958	9.86066	10.0732	23.6543	10.137	333.675	269.236	3.33	0	3.01072	1570.38	1.86356	1.47497	1	nan	nan
30/03/2018 03:30	nan	-174.042	-55.4564	12.468	1.08398	0	33.6909	9.71716	10.0448	23.6511	10.1364	333.75	269.305	3.1	0	2.80278	1572.87	1.65356	1.27725	1	nan	nan
30/03/2018 03:40	nan	-174.003	-55.481	12.123	1.41308	0	33.6754	9.65064	9.85442	23.646	9.99987	335.117	270.372	3.05	0	2.75757	1589.67	1.60127	1.22983	1	nan	nan
30/03/2018 03:50	nan	-173.963	-55.5057	12.122	1.00107	0	33.6739	9.40538	9.77498	23.6395	9.8368	336.024	271.031	2.81	0	2.54058	1596.74	1.39697	1.04158	1	nan	nan
30/03/2018 04:00	nan	-173.924	-55.5308	12.132	2.46434	0	33.6294	9.03336	9.48799	23.6297	9.71042	337.559	272.288	2.47	0	2.23318	1622.64	1.12543	0.798329	1	nan	nan
30/03/2018 04:10	nan	-173.884	-55.5558	12.49	-0.401593	0	33.5397	8.91586	8.99566	23.6185	9.18094	342.207	275.948	2.53	0	2.28743	1668.31	1.1534	0.826041	1	nan	nan
30/03/2018 04:20	nan	-173.843	-55.5803	12.416	1.85359	0	33.528	8.85545	8.93157	23.6084	9.00411	342.797	276.361	2.64	0	2.38688	1674.38	1.23292	0.897801	1	nan	nan
30/03/2018 04:30	nan	-173.802	-55.605	12.27	2.08459	0	33.5344	8.79074	8.93938	23.599	9.0203	342.574	276.177	2.6	0	2.35071	1673.63	1.2032	0.870994	1	nan	nan
30/03/2018 04:40	nan	-173.763	-55.6298	11.924	0.228212	0	33.5172	8.72458	8.87702	23.5925	8.97081	343.29	276.762	3.05	0	2.75757	1679.56	1.55783	1.19647	1	nan	nan
30/03/2018 04:50	nan	-173.723	-55.6545	12.236	0.627331	0	33.5055	8.68913	8.81961	23.5865	8.9138	343.965	277.3	3.11	0	2.81182	1685.04	1.6061	1.24198	1	nan	nan
30/03/2018 05:00	nan	-173.683	-55.6793	12.089	0.400788	0	33.5064	8.64065	8.79413	23.583	8.87091	344.384	277.616	2.89	0	2.61291	1687.47	1.4226	1.07171	1	nan	nan
30/03/2018 05:10	nan	-173.643	-55.7039	12.591	1.42114	0	33.5142	8.60212	8.76286	23.5757	8.85153	344.602	277.769	2.59	0	2.34167	1690.47	1.18979	0.859992	1	nan	nan
30/03/2018 05:20	nan	-173.602	-55.7286	11.961	0.380284	0	33.5226	8.58277	8.71696	23.5682	8.80427	344.912	277.981	2.77	0	2.50442	1694.88	1.32466	0.9824	1	nan	nan
30/03/2018 05:30	nan	-173.562	-55.7533	11.995	2.27758	0	33.5282	8.57799	8.70404	23.5596	8.78204	344.892	277.944	2.85	0	2.57675	1696.13	1.38702	1.03958	1	nan	nan
30/03/2018 05:40	nan	-173.522	-55.778	12.453	0.725748	0	33.5309	8.60243	8.71175	23.5523	8.78136	344.817	277.878	3.02	0	2.73045	1695.39	1.52551	1.16756	1	nan	nan
30/03/2018 05:50	nan	-173.482	-55.8028	12.07	2.4081	0	33.5089	8.6259	8.75628	23.5464	8.81445	344.526	277.699	3.07	0	2.77565	1691.1	1.56932	1.20807	1	nan	nan
30/03/2018 06:00	nan	-173.442	-55.8271	12.063	1.77104	0	33.5014	8.6541	8.84251	23.5409	8.8559	344.028	277.331	3.31	0	2.99264	1682.85	1.78222	1.40777	1	nan	nan
30/03/2018 06:10	nan	-173.402	-55.8517	12.388	1.2037	0	33.4955	8.66081	9.12332	23.5338	9.14193	343.57	277.108	3.09	0	2.79373	1656.31	1.60279	1.23664	1	nan	nan
30/03/2018 06:20	nan	-173.362	-55.8766	12.235	1.40753	0	33.4956	8.66533	9.13421	23.529	9.20199	343.819	277.337	2.87	0	2.59483	1655.3	1.42015	1.06715	1	nan	nan
30/03/2018 06:30	nan	-173.321	-55.9013	11.785	1.18543	0	33.4959	8.66543	9.14138	23.5261	9.21211	343.655	277.208	3.02	0	2.73045	1654.63	1.54418	1.18185	1	nan	nan
30/03/2018 06:40	nan	-173.281	-55.9268	12.452	0.83352	0	33.4972	8.63573	9.13483	23.5221	9.21449	343.811	277.333	3.22	0	2.91127	1655.24	1.7165	1.34332	1	nan	nan
30/03/2018 06:50	nan	-173.24	-55.9517	12.343	0.982325	0	33.4997	8.6358	9.10051	23.5214	9.17175	344.099	277.541	3.04	0	2.74853	1658.45	1.55925	1.19618	1	nan	nan
30/03/2018 07:00	nan	-173.199	-55.9763	11.928	1.72276	0	33.4987	8.59566	9.10409	23.5191	9.18338	343.999	277.467	3.64	0	3.291	1658.11	2.1056	1.71512	1	nan	nan
30/03/2018 07:10	nan	-173.158	-56.0014	12.38	0.848282	0	33.5025	8.55434	9.05566	23.5117	9.14895	344.228	277.629	3.45	0	3.11922	1662.66	1.9215	1.53863	1	nan	nan
30/03/2018 07:20	nan	-173.117	-56.0266	12.314	1.58536	0	33.5043	8.48018	9.00003	23.5062	9.08642	344.749	278.016	3.24	0	2.92935	1667.9	1.72765	1.35489	1	nan	nan
30/03/2018 07:30	nan	-173.077	-56.0515	12.174	0.0360524	0	33.4933	8.44985	8.90679	23.5005	9.0059	345.932	278.952	3.23	0	2.92031	1676.73	1.71427	1.34299	1	nan	nan
30/03/2018 07:40	nan	-173.035	-56.0765	12.384	2.00427	0	33.4935	8.39748	8.87978	23.4917	8.96345	346.147	279.105	3.4	0	3.07401	1679.3	1.86581	1.48694	1	nan	nan
30/03/2018 07:50	nan	-172.994	-56.102	12.193	2.09227	0	33.4883	8.30124	8.82715	23.4835	8.92042	346.339	279.248	3.42	0	3.09209	1684.32	1.8814	1.50224	1	nan	nan
30/03/2018 08:00	nan	-172.952	-56.1273	12.137	0.928041	0	33.4769	8.24505	8.70781	23.4762	8.81895	347.612	280.247	3.26	0	2.94743	1695.77	1.73101	1.36035	1	nan	nan
30/03/2018 08:10	nan	-172.912	-56.152	12.133	0.867551	0	33.4746	8.24754	8.66389	23.4643	8.74552	348.491	280.924	3.59	0	3.24579	1700.01	2.03158	1.64764	1	nan	nan
30/03/2018 08:20	nan	-172.871	-56.1769	12.49	1.45313	0	33.4806	8.25591	8.6851	23.4465	8.74547	348.188	280.669	3.67	0	3.31812	1697.96	2.10977	1.72293	1	nan	nan
30/03/2018 08:30	nan	-172.83	-56.202	12.28	1.45967	0	33.4855	8.27167	8.72336	23.4324	8.78365	347.566	280.177	3.69	0	3.33621	1694.27	2.13155	1.74365	1	nan	nan
30/03/2018 08:40	nan	-172.788	-56.2275	12.545	0.391995	0	33.4911	8.22943	8.75939	23.4193	8.82656	347.007	279.737	3.62	0	3.27292	1690.81	2.06586	1.67984	1	nan	nan
30/03/2018 08:50	nan	-172.747	-56.2529	12.438	1.41743	0	33.4894	8.1406	8.67812	23.4107	8.78957	347.465	280.092	3.61	0	3.26388	1698.63	2.05151	1.66672	1	nan	nan
30/03/2018 09:00	nan	-172.706	-56.2779	12.276	0.598534	0	33.4864	8.01977	8.56911	23.3946	8.67731	348.346	280.753	4.05	0	3.66169	1709.2	2.48603	2.09128	1	nan	nan
30/03/2018 09:10	nan	-172.664	-56.3031	12.608	0.456149	0	33.4628	7.94878	8.41571	23.3784	8.54589	349.672	281.801	3.78	0	3.41758	1724.21	2.20092	1.81379	1	nan	nan
30/03/2018 09:20	nan	-172.622	-56.3285	12.287	1.39227	0	33.4593	7.95262	8.34824	23.3611	8.41737	350.884	282.721	3.83	0	3.46278	1730.86	2.2462	1.85851	1	nan	nan
30/03/2018 09:30	nan	-172.581	-56.3546	12.452	0.490599	0	33.4507	8.3059	8.39503	23.3404	8.47033	350.11	282.139	3.75	0	3.39045	1726.24	2.17012	1.78406	1	nan	nan
30/03/2018 09:40	nan	-172.54	-56.3801	12.278	1.0756	0	33.4868	8.53776	8.91609	23.3234	8.78532	346.515	279.328	4.07	0	3.67977	1675.84	2.53188	2.1329	1	nan	nan
30/03/2018 09:50	nan	-172.498	-56.4052	12.364	0.595908	0	33.4994	8.60893	9.22201	23.3071	9.25188	343.208	276.86	4.66	0	4.2132	1647.11	3.22522	2.82039	1	nan	nan
30/03/2018 10:00	nan	-172.456	-56.4306	12.687	0.741887	0	33.4966	8.63952	9.21789	23.2905	9.29943	343.079	276.784	5.06	0	4.57485	1647.5	3.72331	3.32497	1	nan	nan
30/03/2018 10:10	nan	-172.412	-56.456	12.5	1.88323	0	33.4939	8.65756	9.20783	23.2746	9.28061	343.084	276.784	4.88	0	4.41211	1648.43	3.49367	3.09174	1	nan	nan
30/03/2018 10:20	nan	-172.369	-56.4815	12.59	2.25187	0	33.4927	8.7472	9.20036	23.2592	9.26453	343.457	277.079	4.5	0	4.06854	1649.13	3.03377	2.62843	1	nan	nan
30/03/2018 10:30	nan	-172.325	-56.5068	12.318	2.20032	0	33.498	8.75751	9.32218	23.2451	9.35742	341.957	275.903	4.21	0	3.80635	1637.84	2.71392	2.30849	1	nan	nan
30/03/2018 10:40	nan	-172.282	-56.5322	12.565	1.22313	0	33.4925	8.69829	9.30808	23.2321	9.40759	341.818	275.824	4.25	0	3.84251	1639.14	2.75728	2.35163	1	nan	nan
30/03/2018 10:50	nan	-172.24	-56.5578	12.548	0.907032	0	33.4861	8.73969	9.20011	23.2202	9.30062	343.057	276.785	4.08	0	3.68881	1649.15	2.56303	2.16067	1	nan	nan
30/03/2018 11:00	nan	-172.198	-56.5842	12.341	0.638312	0	33.4868	8.8759	9.25853	23.2078	9.27838	342.945	276.683	4.14	0	3.74306	1643.73	2.63224	2.22836	1	nan	nan
30/03/2018 11:10	nan	-172.156	-56.6099	12.572	1.51617	0	33.481	8.94143	9.47284	23.1984	9.49758	340.505	274.827	4.01	0	3.62553	1624.02	2.50751	2.10326	1	nan	nan
30/03/2018 11:20	nan	-172.113	-56.6357	12.689	0.717542	0	33.4812	8.96386	9.52775	23.1889	9.59551	340.125	274.566	4.06	0	3.67073	1619.02	2.56512	2.15936	1	nan	nan
30/03/2018 11:30	nan	-172.07	-56.6616	12.696	0.826708	0	33.4824	8.96844	9.52579	23.176	9.60035	340.216	274.639	4.05	0	3.66169	1619.2	2.55418	2.14862	1	nan	nan
30/03/2018 11:40	nan	-172.028	-56.6872	12.697	1.25969	0	33.4844	8.985	9.51086	23.1632	9.58242	340.29	274.687	3.95	0	3.57128	1620.55	2.44646	2.04297	1	nan	nan
30/03/2018 11:50	nan	-171.985	-56.7128	12.758	0.212068	0	33.4844	8.95659	9.52305	23.1517	9.59644	340.248	274.66	3.8	0	3.43566	1619.45	2.2914	1.8914	1	nan	nan
30/03/2018 12:00	nan	-171.941	-56.7383	12.704	0.573767	0	33.4938	8.8852	9.47489	23.1377	9.55918	340.491	274.822	3.63	0	3.28196	1623.83	2.11786	1.72362	1	nan	nan
30/03/2018 12:10	nan	-171.897	-56.7635	12.675	0.826198	0	33.4945	8.89064	9.40176	23.1252	9.51782	341.061	275.262	3.72	0	3.36333	1630.52	2.20277	1.80643	1	nan	nan
30/03/2018 12:20	nan	-171.854	-56.7889	12.695	1.99802	0	33.4882	8.92047	9.41541	23.1111	9.45064	341.658	275.723	3.51	0	3.17347	1629.27	1.99804	1.60885	1	nan	nan
30/03/2018 12:30	nan	-171.813	-56.8155	12.612	0.737471	0	33.4892	8.94054	9.47709	23.0962	9.54527	340.984	275.221	3.62	0	3.27292	1623.63	2.10816	1.71424	1	nan	nan
30/03/2018 12:40	nan	-171.77	-56.8415	12.534	1.80315	0	33.4893	8.97043	9.50642	23.0818	9.57304	340.599	274.923	3.92	0	3.54415	1620.96	2.41459	2.0118	1	nan	nan
30/03/2018 12:50	nan	-171.727	-56.8673	12.452	0.638053	0	33.482	9.03549	9.55616	23.0716	9.58457	340.474	274.841	4.2	5	3.79731	1616.44	2.7207	2.31269	1	nan	nan
30/03/2018 13:00	nan	-171.684	-56.893	12.424	1.49585	0	33.4726	9.04008	9.75839	23.0641	9.82924	339.445	274.14	4.05	5	3.66169	1598.22	2.57089	2.16267	1	nan	nan
30/03/2018 13:10	nan	-171.641	-56.9185	12.931	1.50376	0	33.4748	8.99373	9.62592	23.0567	9.71937	339.771	274.349	3.98	0	3.5984	1610.13	2.48624	2.08082	1	nan	nan
30/03/2018 13:20	nan	-171.598	-56.9442	12.116	2.84318	0	33.4828	8.9611	9.55856	23.0519	9.65897	340.51	274.903	3.84	0	3.47182	1616.22	2.33481	1.93335	1	nan	nan
30/03/2018 13:30	nan	-171.555	-56.9705	12.913	2.71049	0	33.4838	9.01202	9.5011	23.0483	9.58047	340.976	275.241	3.76	0	3.3995	1621.44	2.24928	1.85065	1	nan	nan
30/03/2018 13:40	nan	-171.512	-56.9967	12.796	2.0206	0	33.4778	9.0506	9.58788	23.0427	9.63416	340.372	274.789	3.45	0	3.11922	1613.56	1.95052	1.56187	1	nan	nan
30/03/2018 13:50	nan	-171.468	-57.0226	12.952	1.37598	0	33.478	9.0524	9.64499	23.0378	9.71495	339.233	273.907	3.28	0	2.96552	1608.41	1.79557	1.414	1	nan	nan
30/03/2018 14:00	nan	-171.425	-57.0485	12.505	0.843859	0	33.4797	9.05227	9.62348	23.0358	9.70302	339.407	274.038	3.15	0	2.84798	1610.35	1.67801	1.30335	1	nan	nan
30/03/2018 14:10	nan	-171.381	-57.0741	12.753	0.508357	0	33.4821	9.01378	9.62212	23.0367	9.71487	339.277	273.934	3.82	0	3.45374	1610.47	2.31833	1.91668	1	nan	nan
30/03/2018 14:20	nan	-171.337	-57.0996	12.482	1.3059	0	33.4815	9.01519	9.54927	23.0329	9.64112	340.3	274.727	3.31	0	2.99264	1617.06	1.81811	1.43612	1	nan	nan
30/03/2018 14:30	nan	-171.294	-57.1254	12.653	2.2766	0	33.4832	9.06397	9.56068	23.0312	9.61757	340.337	274.743	3.25	0	2.93839	1616.03	1.76417	1.38497	1	nan	nan
30/03/2018 14:40	nan	-171.25	-57.1511	12.66	1.74579	0	33.4893	9.11335	9.65465	23.0301	9.71917	338.956	273.665	3.17	0	2.86606	1607.54	1.69717	1.3211	1	nan	nan
30/03/2018 14:50	nan	-171.206	-57.1765	12.632	0.0148542	0	33.488	9.10956	9.70769	23.0253	9.7669	338.64	273.434	2.81	0	2.54058	1602.77	1.39434	1.03962	1	nan	nan
30/03/2018 15:00	nan	-171.161	-57.2019	12.879	2.52197	0	33.4862	9.00065	9.70088	23.0234	9.79348	338.555	273.381	2.92	0	2.64003	1603.38	1.48431	1.1224	1	nan	nan
30/03/2018 15:10	nan	-171.117	-57.2276	12.721	2.17199	0	33.4849	8.96672	9.52267	23.0204	9.65426	340.025	274.505	3.4	0	3.07401	1619.48	1.89996	1.51415	1	nan	nan
30/03/2018 15:20	nan	-171.073	-57.2538	12.703	1.67556	0	33.4909	8.99455	9.47628	23.016	9.54932	340.694	274.986	3.44	0	3.11018	1623.71	1.93498	1.54797	1	nan	nan
30/03/2018 15:30	nan	-171.03	-57.2795	12.547	1.87903	0	33.4901	9.03053	9.55568	23.0165	9.60596	340.06	274.502	2.99	0	2.70332	1616.48	1.53686	1.17208	1	nan	nan
30/03/2018 15:40	nan	-170.987	-57.3051	12.529	0.0561797	0	33.4859	9.09086	9.60968	23.0133	9.68183	339.255	273.895	3.01	0	2.7214	1611.59	1.55615	1.18961	1	nan	nan
30/03/2018 15:50	nan	-170.944	-57.331	12.801	2.28464	0	33.4877	9.05324	9.69405	23.0125	9.73883	338.922	273.649	3.06	0	2.76661	1603.99	1.60272	1.23237	1	nan	nan
30/03/2018 16:00	nan	-170.9	-57.3568	12.587	0.0118213	0	33.4875	8.92463	9.6288	23.0109	9.74857	339.194	273.874	4.07	0	3.67977	1609.87	2.58324	2.17617	1	nan	nan
30/03/2018 16:10	nan	-170.856	-57.3826	12.512	2.66579	0	33.494	8.83928	9.43847	23.0061	9.57586	340.903	275.162	4.1	0	3.7069	1627.16	2.60197	2.1966	1	nan	nan
30/03/2018 16:20	nan	-170.813	-57.4089	12.785	1.28531	0	33.4969	8.74269	9.33737	23.0037	9.43329	341.839	275.845	4.39	0	3.96909	1636.44	2.918	2.51118	1	nan	nan
30/03/2018 16:30	nan	-170.769	-57.4353	12.617	1.2768	0	33.4877	8.46385	9.25174	23.0002	9.38652	342.109	276.058	4.68	0	4.23129	1644.35	3.25204	2.84704	1	nan	nan
30/03/2018 16:40	nan	-170.726	-57.4615	12.835	-0.282265	0	33.4616	8.25603	8.85029	22.9991	9.05487	345.88	278.99	4.57	0	4.13183	1682.11	3.08528	2.68414	1	nan	nan
30/03/2018 16:50	nan	-170.682	-57.487	12.536	1.6368	0	33.4512	8.13541	8.62518	23.0007	8.74633	348.275	280.792	4.28	0	3.86964	1703.75	2.73742	2.33928	1	nan	nan
30/03/2018 17:00	nan	-170.639	-57.5125	12.461	0.094585	0	33.4446	8.08697	8.5357	23.0052	8.63728	348.908	281.262	3.87	0	3.49895	1712.45	2.29845	1.90771	1	nan	nan
30/03/2018 17:10	nan	-170.595	-57.5382	12.558	1.56053	0	33.4453	8.07871	8.52597	23.0123	8.60465	349.101	281.401	3.41	0	3.08305	1713.4	1.85624	1.48074	1	nan	nan
30/03/2018 17:20	0.291816	-170.55	-57.5646	13.013	2.1637	0	33.4468	8.09132	8.5402	23.0252	8.62151	348.831	281.188	3.83	0	3.46278	1712.01	2.25853	1.86871	1	0.158178	0.130877
30/03/2018 17:30	nan	-170.506	-57.5904	12.936	1.48442	0	33.4571	8.09371	8.56259	23.0357	8.62439	348.747	281.103	4.48	0	4.05046	1709.83	2.95655	2.55846	1	nan	nan
30/03/2018 17:40	nan	-170.461	-57.6162	12.815	0.949314	0	33.4606	8.11253	8.59806	23.046	8.6787	348.289	280.754	4.38	0	3.96005	1706.38	2.84635	2.44799	1	nan	nan
30/03/2018 17:50	nan	-170.417	-57.6422	12.708	1.52292	0	33.4619	8.11815	8.60808	23.0542	8.68603	348.062	280.572	4.59	0	4.14992	1705.41	3.08742	2.68912	1	nan	nan
30/03/2018 18:00	nan	-170.372	-57.6682	12.559	2.37171	0	33.463	8.10627	8.59917	23.0646	8.69141	348.025	280.543	3.86	0	3.48991	1706.28	2.29251	1.90129	1	nan	nan
30/03/2018 18:10	nan	-170.328	-57.6939	12.699	2.18973	0	33.4636	7.91888	8.5435	23.0769	8.66938	347.799	280.349	3.86	0	3.48991	1711.69	2.28887	1.89828	1	nan	nan
30/03/2018 18:20	nan	-170.285	-57.7197	12.296	1.2334	0	33.4447	7.44939	8.17619	23.0893	8.41366	349.263	281.44	3.87	0	3.49895	1747.98	2.27498	1.88822	1	nan	nan
30/03/2018 18:30	nan	-170.243	-57.7452	12.346	0.58071	0	33.4164	7.14833	7.4633	23.1005	7.72807	356.468	286.959	3.8	0	3.43566	1821.17	2.16077	1.78357	1	nan	nan
30/03/2018 18:40	nan	-170.2	-57.7698	12.338	1.73144	0	33.4173	6.91402	7.16038	23.1094	7.35293	358.941	288.76	3.49	0	3.15538	1853.41	1.85545	1.4913	1	nan	nan
30/03/2018 18:50	nan	-170.157	-57.7947	12.194	0.387438	0	33.4141	6.8046	6.94496	23.1201	7.08397	360.767	290.098	3.42	0	3.09209	1876.77	1.78232	1.42313	1	nan	nan
30/03/2018 19:00	nan	-170.114	-57.8195	12.161	1.13142	0	33.4085	6.74278	6.87644	23.1272	6.9828	361.266	290.459	3.49	0	3.15538	1884.28	1.84019	1.47903	1	nan	nan
30/03/2018 19:10	nan	-170.072	-57.8443	12.075	1.59476	0	33.4067	6.69809	6.86466	23.1349	6.95698	361.393	290.551	3.15	0	2.84798	1885.57	1.55072	1.20448	1	nan	nan
30/03/2018 19:20	nan	-170.029	-57.8691	11.917	1.64786	0	33.3987	6.62628	6.83852	23.1454	6.93664	361.83	290.908	3.08	0	2.78469	1888.45	1.49305	1.15066	1	nan	nan
30/03/2018 19:30	0.789145	-169.987	-57.8937	12.049	1.31618	0	33.3917	6.57428	6.77317	23.1515	6.89549	362.092	291.11	2.65	0	2.39592	1895.66	1.16582	0.85018	1	0.2208	0.16102
30/03/2018 19:40	nan	-169.944	-57.9187	12.225	2.49246	0	33.3877	6.53088	6.70403	23.1603	6.80838	363.018	291.818	2.65	0	2.39592	1903.32	1.16347	0.848466	1	nan	nan
30/03/2018 19:50	0.44284	-169.901	-57.9437	12.245	0.221641	0	33.3852	6.49369	6.67144	23.1702	6.77519	363.526	292.214	2.51	0	2.26934	1906.95	1.06519	0.760461	1	0.11321	0.080823
30/03/2018 20:00	nan	-169.858	-57.9686	12.351	1.1663	0	33.3838	6.47703	6.63262	23.1787	6.7312	364.436	292.926	2.29	0	2.07044	1911.28	0.919496	0.632277	1	nan	nan
30/03/2018 20:10	nan	-169.815	-57.9937	12.291	1.3005	0	33.3832	6.45699	6.62843	23.1829	6.71717	364.57	293.027	1.95	0	1.76304	1911.75	0.715478	0.458409	1	nan	nan
30/03/2018 20:20	nan	-169.772	-58.0188	12.26	0.883105	0	33.383	6.41745	6.62935	23.1856	6.72376	364.463	292.945	1.61	0	1.45563	1911.65	0.535092	0.312498	1	nan	nan
30/03/2018 20:30	nan	-169.728	-58.044	12.153	1.90999	0	33.3846	6.39313	6.57835	23.1901	6.68512	365.203	293.517	1.6	0	1.44659	1917.36	0.529351	0.308168	1	nan	nan
30/03/2018 20:40	nan	-169.685	-58.0694	12.308	0.96172	0	33.3865	6.37797	6.55595	23.1906	6.6558	365.4	293.656	1.81	0	1.63646	1919.87	0.636997	0.394112	1	nan	nan
30/03/2018 20:50	nan	-169.641	-58.0944	12.165	1.37081	0	33.3855	6.40829	6.53678	23.1878	6.62873	365.658	293.852	1.6	0	1.44659	1922.02	0.528708	0.307793	1	nan	nan
30/03/2018 21:00	nan	-169.597	-58.1197	12.873	0.760345	0	33.3831	6.438	6.60697	23.1839	6.67549	364.931	293.296	1.47	0	1.32906	1914.15	0.467333	0.260343	1	nan	nan
30/03/2018 21:10	2.87081	-169.552	-58.1453	12.523	0.000326165	0	33.3823	6.42608	6.64157	23.1823	6.72524	364.304	292.819	1.68	0	1.51892	1910.28	0.570516	0.340384	1	0.393082	0.234523
30/03/2018 21:20	nan	-169.507	-58.1706	12.545	0.448924	0	33.3841	6.44502	6.63113	23.1776	6.72971	364.284	292.802	2	0	1.80824	1911.45	0.744049	0.482256	1	nan	nan
30/03/2018 21:30	nan	-169.463	-58.1964	12.412	1.08515	0	33.3835	6.55543	6.64114	23.1712	6.7112	364.44	292.919	2.22	0	2.00715	1910.33	0.875807	0.594362	1	nan	nan
30/03/2018 21:40	nan	-169.419	-58.2225	12.429	3.24857	0	33.3772	6.59666	6.81888	23.163	6.86016	362.657	291.575	2.56	0	2.31455	1890.61	1.10417	0.794471	1	nan	nan
30/03/2018 21:50	nan	-169.375	-58.2486	12.72	-0.181077	0	33.3774	6.63675	6.85065	23.1608	6.92802	362.247	291.279	2.76	0	2.49537	1887.11	1.24802	0.924312	1	nan	nan
30/03/2018 22:00	2.56975	-169.33	-58.2742	12.671	0.242983	0	33.3769	6.64397	6.88642	23.1591	6.96266	362.103	291.182	2.9	0	2.62195	1883.18	1.35429	1.02152	1	0.835241	0.630015
30/03/2018 22:10	nan	-169.285	-58.2995	12.717	1.43086	0	33.3752	6.61555	6.86299	23.1627	6.96552	362.076	291.165	3.27	0	2.95648	1885.75	1.64988	1.29793	1	nan	nan
30/03/2018 22:20	4.57608	-169.241	-58.3245	12.467	0.834223	0	33.3784	6.61717	6.8237	23.1654	6.92134	362.506	291.482	3.76	0	3.3995	1890.08	2.08331	1.71409	1	2.28802	1.88252
30/03/2018 22:30	3.27936	-169.197	-58.3496	12.114	0.676467	0	33.3781	6.64096	6.83153	23.1646	6.91643	362.506	291.48	3.64	0	3.291	1889.21	1.97261	1.6068	1	1.55254	1.26462
30/03/2018 22:40	6.00072	-169.152	-58.3746	12.267	0.504167	0	33.3795	6.67734	6.86438	23.1673	6.94331	361.942	291.037	3.17	0	2.86606	1885.6	1.56704	1.21981	1	2.25681	1.75674
30/03/2018 22:50	nan	-169.108	-58.3993	11.983	1.92917	0	33.3812	6.69792	6.89842	23.1675	6.97755	361.696	290.854	3.02	0	2.73045	1881.86	1.44795	1.1082	1	nan	nan
30/03/2018 23:00	nan	-169.063	-58.4241	12.192	1.42803	0	33.3825	6.6772	6.92106	23.1704	7.00957	361.47	290.686	3.62	0	3.27292	1879.38	1.95948	1.59334	1	nan	nan
30/03/2018 23:10	6.57728	-169.02	-58.4492	12.383	0.947754	0	33.3816	6.66127	6.89139	23.1686	6.99704	361.383	290.611	4.19	0	3.78827	1882.64	2.51073	2.13277	1	3.9633	3.36668
30/03/2018 23:20	1.26322	-168.976	-58.4746	12.238	1.79605	0	33.3785	6.62699	6.84665	23.1674	6.942	362.29	291.319	4	0	3.61648	1887.55	2.31599	1.9412	1	0.702146	0.588517
30/03/2018 23:30	nan	-168.933	-58.5	12.472	-0.0284996	0	33.3775	6.60914	6.82869	23.1651	6.92148	362.446	291.435	3.87	0	3.49895	1889.53	2.18811	1.81612	1	nan	nan
30/03/2018 23:40	nan	-168.889	-58.525	12.312	0.647045	0	33.3805	6.61465	6.79311	23.1649	6.89897	362.355	291.345	3.83	0	3.46278	1893.45	2.14759	1.77693	1	nan	nan
30/03/2018 23:50	0.854325	-168.846	-58.55	12.072	1.68173	0	33.3753	6.50056	6.82649	23.1606	6.9151	362.082	291.143	4.94	0	4.46636	1889.77	3.3334	2.95902	1	0.683473	0.606712
31/03/2018 00:00	nan	-168.804	-58.5762	12.307	1.00708	0	33.3752	6.39853	6.64539	23.1578	6.79266	363.47	292.197	5.95	0	5.37952	1909.85	4.60501	4.27005	1	nan	nan
31/03/2018 00:10	3.08676	-168.761	-58.6017	12.311	0.992336	0	33.3782	6.25839	6.54933	23.1528	6.68769	364.414	292.896	7.01	0	6.33789	1920.61	6.16385	5.91037	1	4.56633	4.37854
31/03/2018 00:20	nan	-168.716	-58.6265	12.299	1.71568	0	33.3941	6.27881	6.37546	23.146	6.50435	367.37	295.146	6.34	0	5.73213	1940.27	5.11775	4.81001	1	nan	nan
31/03/2018 00:30	2.40461	-168.67	-58.6515	12.262	-2.10493	0	33.3897	6.26567	6.44905	23.1428	6.5129	366.723	294.639	6.58	0	5.94912	1931.92	5.48266	5.19225	1	3.16408	2.99649
31/03/2018 00:40	nan	-168.626	-58.6771	12.687	nan	0	33.3886	6.29033	6.45177	23.1356	6.55891	366.353	294.368	6.85	0	6.19323	1931.62	5.89514	5.62755	1	nan	nan
31/03/2018 00:50	nan	-168.58	-58.7029	12.396	nan	0	33.3877	6.34505	6.48468	23.1286	6.54388	366.292	294.312	7.98	0	7.21489	1927.9	7.78714	7.64474	1	nan	nan
31/03/2018 01:00	nan	-168.534	-58.7286	12.678	nan	0	33.3858	6.31319	6.57229	23.1193	6.65078	365.329	293.598	8.91	0	8.05572	1918.03	9.55802	9.5549	1	nan	nan
31/03/2018 01:10	nan	-168.488	-58.754	12.459	nan	0	33.3862	6.22193	6.51681	23.113	6.6393	365.601	293.81	8.98	0	8.11901	1924.27	9.68119	9.68988	1	nan	nan
31/03/2018 01:20	nan	-168.443	-58.7795	12.572	nan	0	33.3891	6.1597	6.39717	23.1001	6.5347	366.369	294.367	8.86	0	8.01051	1937.81	9.41104	9.39964	1	nan	nan
31/03/2018 01:30	nan	-168.398	-58.8049	12.502	nan	0	33.3961	6.18938	6.3184	23.0903	6.42426	367.339	295.076	8.9	0	8.04668	1946.78	9.46758	9.46282	1	nan	nan
31/03/2018 01:40	nan	-168.352	-58.8305	12.728	nan	0	33.3935	6.23019	6.36358	23.0826	6.42423	366.863	294.698	8.95	0	8.09188	1941.63	9.57854	9.58213	1	nan	nan
31/03/2018 01:50	nan	-168.307	-58.8562	12.629	nan	0	33.3915	6.22573	6.44423	23.077	6.52731	365.81	293.909	8.8	0	7.95627	1932.47	9.30682	9.28556	1	nan	nan
31/03/2018 02:00	nan	-168.261	-58.8824	12.443	nan	0	33.3922	6.17135	6.42404	23.0709	6.53394	365.845	293.94	8.73	0	7.89298	1934.76	9.16557	9.13302	1	nan	nan
31/03/2018 02:10	nan	-168.216	-58.9091	12.6	nan	0	33.3968	6.12412	6.33453	23.0683	6.44871	366.883	294.721	8.82	0	7.97435	1944.94	9.3158	9.29786	1	nan	nan
31/03/2018 02:20	nan	-168.171	-58.9358	12.967	nan	0	33.3985	6.0869	6.28965	23.0702	6.40385	367.364	295.08	8.69	0	7.85681	1950.07	9.0527	9.01392	1	nan	nan
31/03/2018 02:30	nan	-168.126	-58.9626	12.812	nan	0	33.4025	6.05702	6.25276	23.0648	6.35424	367.697	295.314	9.43	0	8.52586	1954.3	10.5146	10.603	1	nan	nan
31/03/2018 02:40	nan	-168.079	-58.9887	12.628	nan	0	33.4049	6.00833	6.2132	23.0594	6.32215	367.855	295.419	9.7	0	8.76997	1958.84	11.0661	11.2058	1	nan	nan
31/03/2018 02:50	nan	-168.031	-59.0138	12.743	-0.168762	0	33.4082	5.99292	6.17418	23.058	6.28484	368.027	295.532	9.75	0	8.81518	1963.34	11.1593	11.3086	1	nan	nan
31/03/2018 03:00	nan	-167.984	-59.0392	12.747	1.99331	0	33.41	5.97096	6.14707	23.0585	6.24374	368.147	295.603	9.38	0	8.48066	1966.47	10.3794	10.4583	1	nan	nan
31/03/2018 03:10	5.79513	-167.938	-59.0651	13.053	1.04651	0	33.41	5.95242	6.13535	23.0579	6.23941	368.135	295.591	9.64	0	8.71573	1967.83	10.9146	11.0423	1	15.1804	15.3579
31/03/2018 03:20	0.607886	-167.891	-59.0912	12.882	0.468132	0	33.4117	5.95146	6.11789	23.0528	6.21815	368.26	295.677	9.74	0	8.80614	1969.85	11.1197	11.2668	1	1.62228	1.64374
31/03/2018 03:30	0.473619	-167.845	-59.117	12.73	-0.115542	0	33.4112	5.94702	6.12875	23.0483	6.219	368.257	295.677	9.58	0	8.66148	1968.59	10.787	10.9031	1	1.22614	1.23934
31/03/2018 03:40	nan	-167.798	-59.143	13.121	1.05607	0	33.4103	5.93981	6.12102	23.0484	6.22303	368.155	295.598	9.41	0	8.50778	1969.49	10.4329	10.5172	1	nan	nan
31/03/2018 03:50	2.18912	-167.751	-59.1689	12.851	0.726097	0	33.4108	5.91754	6.12365	23.0461	6.21609	368.179	295.612	9.69	0	8.76093	1969.18	11.016	11.1533	1	5.78767	5.85982
31/03/2018 04:00	1.53231	-167.703	-59.1949	12.926	0.993808	0	33.4126	5.95396	6.09516	23.041	6.20234	368.424	295.799	9.74	0	8.80614	1972.49	11.1123	11.2593	1	4.08658	4.14064
31/03/2018 04:10	0.203959	-167.656	-59.2207	12.693	3.0289	0	33.4143	6.00354	6.14177	23.0325	6.20587	368.254	295.661	9.82	0	8.87847	1967.09	11.2977	11.4607	1	0.553022	0.561002
31/03/2018 04:20	5.50769	-167.612	-59.2473	12.597	0.732968	0	33.4127	6.03335	6.22917	23.0273	6.31077	367.213	294.883	9.79	0	8.85135	1957.01	11.2626	11.4201	1	14.8874	15.0955
31/03/2018 04:30	7.28055	-167.566	-59.2737	12.857	1.95815	0	33.4127	5.95036	6.24664	23.0248	6.33506	367.095	294.801	9.96	0	9.00505	1955	11.6343	11.8262	1	20.3289	20.6643
31/03/2018 04:40	2.1187	-167.52	-59.2997	12.769	1.9328	0	33.4153	5.92633	6.14986	23.022	6.28955	367.738	295.289	9.86	0	8.91463	1966.15	11.3859	11.557	1	5.78959	5.87657
31/03/2018 04:50	6.9863	-167.474	-59.3256	12.968	1.01914	0	33.4166	5.94011	6.08699	23.0198	6.18219	368.829	296.105	9.77	0	8.83326	1973.44	11.1732	11.326	1	18.7341	18.9904
31/03/2018 05:00	2.38374	-167.427	-59.3516	12.632	1.4251	0	33.4161	5.96536	6.13423	23.0139	6.20932	368.458	295.823	9.84	0	8.89655	1967.96	11.3379	11.5049	1	6.48637	6.5819
31/03/2018 05:10	1.82399	-167.381	-59.3776	12.804	1.62319	0	33.4143	5.9873	6.17418	23.0087	6.26217	368.065	295.538	10.31	0	9.32149	1963.34	12.3795	12.645	1	5.41922	5.53544
31/03/2018 05:20	nan	-167.334	-59.4032	12.455	1.88637	0	33.4162	5.96805	6.20695	23.0055	6.29091	367.889	295.408	10.08	0	9.11354	1959.56	11.8822	12.0987	1	nan	nan
31/03/2018 05:30	3.35778	-167.288	-59.4292	12.496	1.91359	0	33.4157	5.97677	6.18937	22.9998	6.28892	368.024	295.517	9.93	0	8.97792	1961.59	11.5498	11.7353	1	9.30763	9.45708
31/03/2018 05:40	1.49744	-167.242	-59.4551	12.628	-0.75099	0	33.415	5.93786	6.1956	22.9931	6.28611	367.931	295.442	10.15	0	9.17683	1960.87	12.032	12.2633	1	4.32413	4.40724
31/03/2018 05:50	4.8149	-167.195	-59.4809	12.62	1.36456	0	33.4233	5.934	6.13436	22.9782	6.25297	368.05	295.505	10.25	0	9.26724	1967.94	12.2314	12.4836	1	14.1344	14.4258
31/03/2018 06:00	5.22092	-167.148	-59.5066	12.635	0.468456	0	33.4251	5.93543	6.23652	22.9643	6.27308	367.652	295.191	10.29	0	9.30341	1956.16	12.3574	12.6191	1	15.4841	15.8119
31/03/2018 06:10	2.80577	-167.102	-59.5325	12.604	2.29949	0	33.4248	5.92976	6.25956	22.9461	6.3595	367.783	295.343	10.73	0	9.70122	1953.52	13.3694	13.7306	1	9.00276	9.246
31/03/2018 06:20	3.4806	-167.055	-59.5583	13.06	1.4131	0	33.4246	5.92869	6.26051	22.931	6.35154	367.574	295.171	10.62	0	9.60177	1953.41	13.1152	13.4509	1	10.9557	11.2361
31/03/2018 06:30	nan	-167.009	-59.5844	12.971	1.15673	0	33.4226	5.91488	6.25571	22.9149	6.35153	367.553	295.158	10.23	0	9.24916	1953.96	12.2306	12.4794	1	nan	nan
31/03/2018 06:40	1.1214	-166.96	-59.6096	12.811	1.39749	0	33.4222	5.90834	6.24895	22.8946	6.34285	367.603	295.195	10.02	0	9.05929	1954.73	11.7656	11.9699	1	3.16654	3.22153
31/03/2018 06:50	nan	-166.909	-59.6335	13.04	1.49146	0	33.4226	5.89636	6.23994	22.8773	6.33307	367.608	295.192	9.72	0	8.78806	1955.77	11.1172	11.2609	1	nan	nan
31/03/2018 07:00	nan	-166.855	-59.6562	12.616	1.47101	0	33.423	5.89271	6.23976	22.8617	6.33298	367.587	295.175	9.65	0	8.72477	1955.79	10.9692	11.0992	1	nan	nan
31/03/2018 07:10	nan	-166.801	-59.6785	12.973	1.1707	0	33.4239	5.87656	6.22664	22.8434	6.3267	367.709	295.268	9.61	0	8.6886	1957.3	10.8809	11.0032	1	nan	nan
31/03/2018 07:20	nan	-166.747	-59.7009	12.894	3.08323	0	33.4245	5.86271	6.21162	22.8252	6.30511	367.757	295.294	9.65	0	8.72477	1959.03	10.9601	11.09	1	nan	nan
31/03/2018 07:30	nan	-166.693	-59.7233	12.827	1.4728	0	33.425	5.85625	6.20394	22.8068	6.2946	368.067	295.536	9.73	0	8.7971	1959.91	11.1267	11.2721	1	nan	nan
31/03/2018 07:40	7.30052	-166.639	-59.7457	12.818	3.10205	0	33.4256	5.83925	6.19699	22.7859	6.29149	368.199	295.64	9.66	0	8.73381	1960.71	10.9765	11.1083	1	19.2322	19.4631
31/03/2018 07:50	6.94761	-166.585	-59.7684	12.785	2.98571	0	33.4256	5.84283	6.1929	22.7704	6.28241	368.188	295.626	10.02	0	9.05929	1961.18	11.7462	11.9502	1	19.586	19.9261
31/03/2018 08:00	3.31116	-166.531	-59.7905	12.733	1.80997	0	33.4251	5.83719	6.18911	22.7476	6.2802	368.222	295.653	9.98	0	9.02313	1961.62	11.658	11.8537	1	9.26435	9.41985
31/03/2018 08:10	nan	-166.477	-59.8125	12.638	2.80296	0	33.4245	5.82384	6.1798	22.7272	6.27446	368.215	295.646	10.08	0	9.11354	1962.69	11.8727	12.0891	1	nan	nan
31/03/2018 08:20	2.22452	-166.422	-59.8346	12.62	2.38915	0	33.4239	5.79917	6.16869	22.7069	6.26326	368.337	295.739	9.95	0	8.996	1963.98	11.586	11.7754	1	6.1856	6.28673
31/03/2018 08:30	0.685666	-166.367	-59.8565	12.658	0.51566	0	33.4232	5.79853	6.15725	22.6896	6.25134	368.373	295.763	10.07	0	9.1045	1965.3	11.843	12.0571	1	1.94888	1.98412
31/03/2018 08:40	0.722774	-166.313	-59.8785	12.495	2.47491	0	33.4227	5.78316	6.14316	22.6694	6.23674	368.378	295.76	10.28	0	9.29436	1966.93	12.3013	12.56	1	2.13386	2.17874
31/03/2018 08:50	0.948887	-166.259	-59.9004	12.202	2.06526	0	33.4232	5.76773	6.12995	22.6502	6.22654	368.601	295.933	10.07	0	9.1045	1968.45	11.8335	12.0475	1	2.69487	2.7436
31/03/2018 09:00	1.84455	-166.206	-59.9225	12.464	1.80173	0	33.4249	5.74248	6.12197	22.6314	6.21617	368.706	296.009	10.14	0	9.16779	1969.38	11.984	12.2127	1	5.30522	5.40643
31/03/2018 09:10	0.073445	-166.154	-59.9453	12.81	3.25646	0	33.427	5.73595	6.09942	22.6115	6.19954	368.789	296.062	10.03	0	9.06833	1971.99	11.7357	11.9412	1	0.206863	0.210485
31/03/2018 09:20	3.22563	-166.101	-59.9676	12.566	2.83163	0	33.4278	5.7409	6.09319	22.591	6.17886	368.914	296.15	10.36	0	9.36669	1972.72	12.4618	12.7376	1	9.6473	9.86079
31/03/2018 09:30	1.77553	-166.047	-59.9895	12.548	1.18292	0	33.4256	5.74305	6.10428	22.5702	6.1911	368.76	296.038	10.01	0	9.05025	1971.43	11.694	11.8953	1	4.98312	5.06893
31/03/2018 09:40	0.214137	-165.993	-60.0115	12.69	2.40108	0	33.4239	5.74344	6.11122	22.5499	6.19884	368.619	295.932	10.6	0	9.58368	1970.63	13.012	13.3416	1	0.668724	0.685666
31/03/2018 09:50	nan	-165.938	-60.0333	12.819	1.34315	0	33.4225	5.74615	6.13265	22.5281	6.2043	368.533	295.868	10.38	0	9.38478	1968.14	12.5211	12.8016	1	nan	nan
31/03/2018 10:00	0.501404	-165.884	-60.0553	12.657	2.88633	0	33.4218	5.77051	6.15703	22.5094	6.22332	368.362	295.742	10.01	0	9.05025	1965.32	11.7121	11.9138	1	1.4094	1.43367
31/03/2018 10:10	0.772747	-165.83	-60.0774	12.716	1.69865	0	33.4216	5.78741	6.18484	22.4931	6.24556	368.392	295.779	9.36	0	8.46257	1962.11	10.35	10.4253	1	1.9195	1.93347
31/03/2018 10:20	0.420845	-165.776	-60.0996	12.607	1.98844	0	33.4199	5.7977	6.20661	22.4732	6.26612	368.139	295.589	9.14	0	8.26367	1959.6	9.91129	9.94735	1	1.00107	1.00471
31/03/2018 10:30	4.14277	-165.723	-60.1217	12.602	1.93195	0	33.4174	5.79785	6.21562	22.4574	6.2817	368.155	295.615	9.24	0	8.35408	1958.57	10.1152	10.1689	1	10.0572	10.1106
31/03/2018 10:40	0.221497	-165.67	-60.1438	12.75	2.21372	0	33.4174	5.81773	6.22365	22.4448	6.28692	368.062	295.543	8.78	0	7.93818	1957.64	9.20813	9.18378	1	0.489498	0.488203
31/03/2018 10:50	1.75028	-165.616	-60.1656	12.676	2.92998	0	33.4181	5.81701	6.24648	22.4315	6.30514	367.775	295.321	8.49	0	7.67599	1955.02	8.66244	8.59288	1	3.6388	3.60958
31/03/2018 11:00	1.8625	-165.562	-60.1879	12.605	2.23114	0	33.4196	5.82496	6.22086	22.4205	6.29306	368.028	295.515	8.44	0	7.63078	1957.96	8.56256	8.48558	1	3.82745	3.79305
31/03/2018 11:10	nan	-165.508	-60.2099	12.437	3.27547	0	33.418	5.81721	6.25652	22.4086	6.31535	367.601	295.187	8.19	0	7.40475	1953.87	8.11173	7.9987	1	nan	nan
31/03/2018 11:20	1.36109	-165.454	-60.2316	12.406	1.69026	0	33.4186	5.73354	6.24838	22.397	6.31904	367.654	295.23	8.07	0	7.29626	1954.8	7.89361	7.76417	1	2.57854	2.53626
31/03/2018 11:30	1.81474	-165.401	-60.2535	12.649	1.78219	0	33.424	5.67243	6.13882	22.3869	6.23718	368.884	296.165	7.53	0	6.80803	1967.43	6.93424	6.73813	1	3.02012	2.9347
31/03/2018 11:40	nan	-165.347	-60.2761	12.409	0.619798	0	33.4219	5.68324	6.05601	22.3728	6.13969	369.708	296.779	7.93	0	7.16968	1977.04	7.60193	7.45483	1	nan	nan
31/03/2018 11:50	nan	-165.292	-60.2977	12.995	1.30503	0	33.4228	5.64767	6.08632	22.3594	6.1359	369.618	296.702	7.39	0	6.68145	1973.51	6.69129	6.47989	1	nan	nan
31/03/2018 12:00	nan	-165.237	-60.3195	12.532	1.64603	0	33.4269	5.56207	6.04065	22.3481	6.11074	370.101	297.069	7.05	0	6.37405	1978.83	6.13534	5.88943	1	nan	nan
31/03/2018 12:10	nan	-165.182	-60.3413	12.556	2.65366	0	33.4297	5.5563	5.96624	22.3297	6.05216	370.723	297.532	7.38	0	6.67241	1987.52	6.65129	6.43955	1	nan	nan
31/03/2018 12:20	4.98071	-165.129	-60.3629	12.331	1.72296	0	33.4296	5.45606	5.96241	22.3138	6.02275	370.838	297.609	7.82	0	7.07023	1987.97	7.39008	7.22949	1	8.83389	8.64192
31/03/2018 12:30	2.03479	-165.077	-60.3847	12.23	1.82809	0	33.4397	5.30958	5.87499	22.2907	5.99563	371.174	297.844	8.6	0	7.77544	1998.25	8.77332	8.7211	1	4.28445	4.25895
31/03/2018 12:40	1.14476	-165.025	-60.4064	12.28	1.89491	0	33.4538	5.27583	5.64033	22.26	5.73496	373.531	299.569	9.91	0	8.95984	2026.14	11.3219	11.5003	1	3.1106	3.15963
31/03/2018 12:50	nan	-164.971	-60.4282	12.496	2.30953	0	33.4513	5.23453	5.64804	22.2274	5.69462	373.176	299.267	10.17	0	9.19491	2025.22	11.8828	12.1145	1	nan	nan
31/03/2018 13:00	nan	-164.917	-60.4498	12.429	4.0699	0	33.4508	5.15757	5.65374	22.1902	5.72993	372.883	299.052	10.24	0	9.2582	2024.54	12.0374	12.2839	1	nan	nan
31/03/2018 13:10	nan	-164.863	-60.4712	12.205	3.19306	0	33.456	5.14859	5.55531	22.1549	5.6303	373.776	299.705	10.48	0	9.47519	2036.37	12.5314	12.829	1	nan	nan
31/03/2018 13:20	nan	-164.809	-60.4925	12.481	1.89683	0	33.4544	5.13842	5.56594	22.111	5.61385	373.813	299.729	10.3	0	9.31245	2035.09	12.1374	12.396	1	nan	nan
31/03/2018 13:30	2.95287	-164.755	-60.5146	12.532	1.73185	0	33.455	5.04576	5.57679	22.0686	5.63395	373.763	299.698	10.7	0	9.6741	2033.78	13.0347	13.3818	1	9.23751	9.48353
31/03/2018 13:40	2.26277	-164.703	-60.5371	12.096	0.662312	0	33.4664	4.98026	5.48263	22.0241	5.58482	374.325	300.1	10.34	0	9.34861	2045.16	12.1951	12.4617	1	6.62276	6.76751
31/03/2018 13:50	nan	-164.649	-60.5586	12.125	3.38936	0	33.4691	4.8823	5.41714	21.9685	5.49697	374.837	300.458	11.03	0	9.97246	2053.12	13.7303	14.1528	1	nan	nan
31/03/2018 14:00	0.766625	-164.594	-60.5794	12.37	0.931044	0	33.4799	4.83283	5.30533	21.913	5.40531	375.361	300.807	11.56	0	10.4516	2066.79	14.9414	15.4941	1	2.74908	2.85076
31/03/2018 14:10	1.01218	-164.541	-60.6011	12.441	2.10546	0	33.4811	4.77477	5.28553	21.8542	5.36121	375.206	300.657	12.17	0	11.0032	2069.22	16.4461	17.1623	1	3.99515	4.16915
31/03/2018 14:20	1.26	-164.489	-60.6231	12.269	2.84668	0	33.4901	4.73249	5.23104	21.7889	5.30671	375.346	300.721	12	0	10.8495	2075.93	15.9911	16.6592	1	4.8357	5.03775
31/03/2018 14:30	nan	-164.435	-60.644	12.098	0.440923	0	33.4924	4.68633	5.19565	21.7165	5.25523	375.396	300.728	12.64	0	11.4281	2080.31	17.6146	18.4642	1	nan	nan
31/03/2018 14:40	1.24893	-164.382	-60.6653	12.103	1.88984	0	33.504	4.64107	5.16567	21.6382	5.23399	375.605	300.861	13.4	0	12.1152	2084.02	19.6487	20.7328	1	5.88959	6.21453
31/03/2018 14:50	2.17497	-164.329	-60.687	12.274	1.21192	0	33.5081	4.59282	5.12355	21.5613	5.1748	376.731	301.723	12.98	0	11.7355	2089.25	18.4788	19.4291	1	9.64582	10.1419
31/03/2018 15:00	5.76394	-164.277	-60.7088	12.011	0.832897	0	33.5077	4.57565	5.09396	21.4822	5.1489	377.096	302.002	12.81	0	11.5818	2092.93	18.0092	18.9069	1	24.9129	26.1547
31/03/2018 15:10	5.39027	-164.224	-60.7294	12.241	1.51803	0	33.5154	4.58936	5.09333	21.4035	5.13044	376.994	301.895	12.61	0	11.401	2093.01	17.4826	18.3208	1	22.6167	23.7009
31/03/2018 15:20	nan	-164.17	-60.75	12.11	0.898974	0	33.5151	4.5369	5.13828	21.3235	5.17338	376.685	301.672	12.08	0	10.9218	2087.42	16.1474	16.8356	1	nan	nan
31/03/2018 15:30	2.13249	-164.116	-60.771	12.037	0.973306	0	33.5179	4.43363	5.07402	21.244	5.14261	377.105	301.985	11.8	0	10.6686	2095.42	15.4221	16.0335	1	7.89298	8.20588
31/03/2018 15:40	4.23822	-164.063	-60.7932	12.484	0.632407	0	33.5251	4.33721	4.9388	21.1644	5.01818	378.377	302.922	12.16	0	10.9941	2112.38	16.2521	16.9582	1	16.5311	17.2494
31/03/2018 15:50	nan	-164.011	-60.8155	12.359	0.542304	0	33.5298	4.20008	4.83211	21.0853	4.91071	379.717	303.925	11.71	0	10.5873	2125.87	15.0929	15.6763	1	nan	nan
31/03/2018 16:00	5.15108	-163.957	-60.8373	12.11	1.17003	0	33.5368	4.12798	4.67943	21.0054	4.76427	381.024	304.877	12.01	0	10.8585	2145.36	15.7548	16.4148	1	19.4771	20.2929
31/03/2018 16:10	3.40864	-163.903	-60.8585	12.412	0.298857	0	33.5402	4.03931	4.62414	20.9268	4.68444	381.704	305.37	12.53	0	11.3286	2152.47	17.0341	17.8375	1	13.9351	14.5923
31/03/2018 16:20	3.83472	-163.849	-60.8797	12.146	0.383578	0	33.5394	4.00444	4.53216	20.847	4.60111	382.81	306.21	11.85	0	10.7138	2164.35	15.2954	15.91	1	14.0769	14.6425
31/03/2018 16:30	3.37642	-163.794	-60.9009	12.093	1.04486	0	33.5365	3.97373	4.50759	20.784	4.55889	383.1	306.424	11.38	0	10.2889	2167.54	14.1673	14.6622	1	11.4803	11.8814
31/03/2018 16:40	1.87083	-163.741	-60.9225	12.166	1.26635	0	33.5275	3.86289	4.49998	20.7396	4.55776	383.086	306.431	11.84	0	10.7048	2168.53	15.2565	15.8679	1	6.85014	7.12466
31/03/2018 16:50	1.91181	-163.686	-60.9441	12.456	1.18726	0	33.5094	3.79652	4.34406	20.7016	4.46458	384.443	307.501	11.58	0	10.4697	2188.91	14.5658	15.1078	1	6.68327	6.93198
31/03/2018 17:00	0.193993	-163.632	-60.9656	12.444	0.430076	0	33.5003	3.79638	4.28843	20.6696	4.31995	385.965	308.656	11.71	0	10.5873	2196.23	14.8491	15.4232	1	0.691352	0.718078
31/03/2018 17:10	4.40562	-163.577	-60.9871	12.276	0.751717	0	33.499	3.72071	4.37588	20.6378	4.40853	385.436	308.285	11.8	0	10.6686	2184.73	15.1036	15.7023	1	15.9698	16.6029
31/03/2018 17:20	3.78839	-163.522	-61.0091	12.389	1.36835	0	33.4924	3.6686	4.29911	20.6065	4.39346	385.996	308.738	11.85	0	10.7138	2194.82	15.1889	15.7992	1	13.8099	14.3649
31/03/2018 17:30	nan	-163.467	-61.0313	12.666	1.11215	0	33.4906	3.58767	4.21913	20.5743	4.28837	386.903	309.408	11.59	0	10.4788	2205.4	14.5347	15.0773	1	nan	nan
31/03/2018 17:40	2.31622	-163.411	-61.0532	12.539	-0.528386	0	33.479	3.46009	4.13573	20.5431	4.22347	387.605	309.957	11.45	0	10.3522	2216.48	14.1719	14.6784	1	7.87803	8.15959
31/03/2018 17:50	nan	-163.357	-61.075	12.358	2.50077	0	33.4615	3.38684	3.99633	20.5097	4.09133	389.462	311.404	11.3	0	10.2166	2235.17	13.7683	14.2364	1	nan	nan
31/03/2018 18:00	3.12154	-163.302	-61.0972	12.503	1.66542	0	33.4529	3.30561	3.9037	20.47	3.97822	390.889	312.497	11.62	0	10.5059	2247.68	14.4673	15.0122	1	10.8385	11.2467
31/03/2018 18:10	nan	-163.247	-61.1189	12.442	2.19244	0	33.4466	3.27625	3.83799	20.4343	3.90685	391.639	313.07	12.02	0	10.8675	2256.61	15.3856	16.0317	1	nan	nan
31/03/2018 18:20	1.39902	-163.192	-61.1404	12.33	3.08549	0	33.4478	3.25026	3.84045	20.3955	3.88742	391.725	313.125	11.3	0	10.2166	2256.27	13.7037	14.1697	1	4.60122	4.75768
31/03/2018 18:30	3.22098	-163.138	-61.1619	12.269	0.717171	0	33.4453	3.23154	3.8158	20.3595	3.87125	392.016	313.353	11.33	0	10.2437	2259.63	13.7617	14.2344	1	10.6383	11.0037
31/03/2018 18:40	nan	-163.083	-61.1833	12.104	0.499893	0	33.4502	3.17207	3.83078	20.3326	3.90106	391.527	312.969	10.99	0	9.93629	2257.59	13.0052	13.399	1	nan	nan
31/03/2018 18:50	nan	-163.029	-61.2048	12.228	1.4823	0	33.4466	3.15415	3.7173	20.3171	3.78871	393.563	314.54	11.65	0	10.533	2273.11	14.4559	15.0052	1	nan	nan
31/03/2018 19:00	nan	-162.974	-61.2263	12.377	3.54651	0	33.4453	3.18603	3.70841	20.3065	3.76078	393.812	314.725	11.21	0	10.1352	2274.33	13.4464	13.8894	1	nan	nan
31/03/2018 19:10	4.95778	-162.92	-61.248	12.363	0.739368	0	33.4422	3.19255	3.74414	20.2919	3.78679	393.281	314.322	10.95	0	9.90013	2269.43	12.8831	13.2669	1	15.3292	15.7858
31/03/2018 19:20	nan	-162.866	-61.2698	12.358	1.28176	0	33.442	3.2229	3.75785	20.2686	3.79724	393.026	314.125	11.46	0	10.3612	2267.55	14.0343	14.5375	1	nan	nan
31/03/2018 19:30	4.80437	-162.811	-61.2911	12.372	1.13464	0	33.4439	3.23675	3.81462	20.2429	3.85239	392.31	313.581	11.35	0	10.2618	2259.79	13.8067	14.2842	1	15.9198	16.4704
31/03/2018 19:40	1.25062	-162.756	-61.3119	12.323	1.38874	0	33.4426	3.24572	3.81764	20.2187	3.86048	392.55	313.779	10.73	0	9.70122	2259.38	12.4316	12.7674	1	3.73132	3.83213
31/03/2018 19:50	nan	-162.702	-61.333	11.949	1.22596	0	33.4417	3.27341	3.83673	20.1953	3.88229	392.239	313.545	11.31	0	10.2256	2256.78	13.7249	14.1932	1	nan	nan
31/03/2018 20:00	4.06311	-162.649	-61.3544	11.938	2.31602	0	33.4452	3.31925	3.86026	20.1662	3.89498	392.024	313.374	11.9	0	10.759	2253.58	15.1085	15.7238	1	14.7331	15.333
31/03/2018 20:10	5.22112	-162.596	-61.3757	11.874	-1.10483	0	33.451	3.2219	3.93937	20.1227	3.96879	390.953	312.547	11.7	0	10.5782	2242.85	14.6705	15.236	1	18.3831	19.0918
31/03/2018 20:20	nan	-162.543	-61.3967	11.925	0.767126	0	33.4472	3.16194	3.79056	20.0657	3.8875	391.972	313.324	12.2	0	11.0303	2263.07	15.7989	16.4918	1	nan	nan
31/03/2018 20:30	0.822238	-162.49	-61.4178	11.75	0.261621	0	33.4477	3.15772	3.6907	20.0053	3.72584	393.212	314.22	12.46	0	11.2653	2276.77	16.3888	17.1505	1	3.23412	3.38442
31/03/2018 20:40	2.42546	-162.437	-61.4384	11.805	1.00314	0	33.454	3.14503	3.7372	19.9432	3.75055	391.97	313.229	12.59	0	11.3829	2270.38	16.7357	17.5348	1	9.74206	10.2072
31/03/2018 20:50	nan	-162.383	-61.4584	11.836	-0.197254	0	33.4552	3.13613	3.75073	19.8786	3.78463	391.374	312.769	12.12	0	10.9579	2268.53	15.5859	16.2567	1	nan	nan
31/03/2018 21:00	5.34783	-162.329	-61.4785	11.64	-1.70795	0	33.4562	3.13062	3.74281	19.8161	3.76991	391.365	312.751	12.42	0	11.2292	2269.61	16.3156	17.0674	1	20.9407	21.9056
31/03/2018 21:10	nan	-162.276	-61.4992	11.795	0.674205	0	33.4586	3.09067	3.74399	19.7527	3.77144	391.054	312.499	11.86	0	10.7229	2269.45	14.9607	15.5635	1	nan	nan
31/03/2018 21:20	1.75877	-162.223	-61.5202	11.737	-0.205523	0	33.4548	3.04031	3.69823	19.6822	3.75029	391.505	312.856	11.47	0	10.3703	2275.73	14.032	14.5367	1	5.92296	6.136
31/03/2018 21:30	6.34002	-162.17	-61.5413	12.129	-0.624508	0	33.4546	2.94592	3.64435	19.6138	3.68823	392.386	313.524	11.66	0	10.5421	2283.15	14.4473	14.9978	1	21.9831	22.8208
31/03/2018 21:40	0.651671	-162.117	-61.5625	11.815	0.201206	0	33.4504	2.85855	3.54503	19.5419	3.60826	392.986	313.966	10.79	0	9.75547	2296.91	12.4586	12.8047	1	1.94853	2.00267
31/03/2018 21:50	2.64807	-162.064	-61.5837	11.856	-0.122117	0	33.4436	2.78726	3.44237	19.4733	3.49848	394.507	315.132	11.98	0	10.8314	2311.23	15.1078	15.7359	1	9.60156	10.0007
31/03/2018 22:00	2.8549	-162.011	-61.6051	11.97	0.334947	0	33.4423	2.76787	3.37907	19.4	3.42512	395.247	315.684	11.3	0	10.2166	2320.12	13.5139	13.9734	1	9.25937	9.57421
31/03/2018 22:10	2.61922	-161.959	-61.6263	11.811	-1.1698	0	33.4431	2.75096	3.39027	19.3267	3.41334	395.679	316.019	11.01	0	9.95437	2318.54	12.8768	13.2699	1	8.09448	8.34159
31/03/2018 22:20	nan	-161.906	-61.6475	11.659	0.0123569	0	33.4441	2.77518	3.39132	19.2528	3.41405	395.89	316.186	11.53	0	10.4245	2318.39	14.0389	14.5534	1	nan	nan
31/03/2018 22:30	4.58602	-161.853	-61.6681	11.959	-0.934958	0	33.4427	2.74718	3.44252	19.1866	3.4643	395.117	315.601	11.99	0	10.8404	2311.21	15.1316	15.7622	1	16.6545	17.3486
31/03/2018 22:40	2.7699	-161.799	-61.689	11.903	0.379281	0	33.4417	2.76986	3.41619	19.1221	3.45594	395.534	315.932	11.38	0	10.2889	2314.9	13.709	14.1879	1	9.11339	9.43176
31/03/2018 22:50	nan	-161.745	-61.7101	11.985	-0.939736	0	33.439	2.81761	3.43878	19.0568	3.45049	395.704	316.07	10.79	0	9.75547	2311.74	12.4186	12.7636	1	nan	nan
31/03/2018 23:00	nan	-161.691	-61.7313	12.07	1.48806	0	33.4377	2.81198	3.51422	18.9917	3.52597	394.767	315.368	11.3	0	10.2166	2301.2	13.5693	14.0307	1	nan	nan
31/03/2018 23:10	3.00572	-161.636	-61.7519	12.098	0.81025	0	33.4391	2.81339	3.50474	18.9302	3.53872	394.799	315.399	11.49	0	10.3884	2302.52	13.9957	14.5023	1	10.0961	10.4616
31/03/2018 23:20	nan	-161.58	-61.772	12.17	nan	0	33.4405	2.79745	3.50113	18.8735	3.52572	394.95	315.508	11.05	0	9.99054	2303.02	13.0079	13.4114	1	nan	nan
31/03/2018 23:30	nan	-161.522	-61.7922	12.466	nan	0	33.4405	2.80075	3.47342	18.8431	3.51055	395.079	315.603	11.04	0	9.9815	2306.89	12.9751	13.3759	1	nan	nan
31/03/2018 23:40	nan	-161.466	-61.8127	12.185	nan	0	33.4427	2.83582	3.43357	18.835	3.47882	395.463	315.886	10.18	0	9.20395	2312.47	11.1406	11.3594	1	nan	nan
31/03/2018 23:50	nan	-161.411	-61.8344	12.105	nan	0	33.4431	2.84482	3.45675	18.8328	3.47456	395.48	315.897	9.68	0	8.75189	2309.22	10.1532	10.2782	1	nan	nan
01/04/2018 00:00	nan	-161.355	-61.8564	12.361	nan	0	33.4434	2.85929	3.46136	18.835	3.49798	395.318	315.78	9.23	0	8.34504	2308.58	9.29827	9.34609	1	nan	nan
01/04/2018 00:10	nan	-161.299	-61.8784	12.579	nan	0	33.4443	2.81419	3.44846	18.8414	3.48559	395.404	315.84	8.98	0	8.11901	2310.38	8.83527	8.84321	1	nan	nan
01/04/2018 00:20	nan	-161.242	-61.9005	12.507	nan	0	33.4477	2.7481	3.39359	18.8427	3.4578	395.882	316.198	8.79	0	7.94722	2318.07	8.47978	8.45888	1	nan	nan
01/04/2018 00:30	nan	-161.186	-61.9229	12.47	nan	0	33.4533	2.75689	3.2594	18.8431	3.30168	397.73	317.571	9.45	0	8.54394	2337.02	9.65296	9.73715	1	nan	nan
01/04/2018 00:40	nan	-161.13	-61.945	12.497	nan	0	33.4505	2.68693	3.30136	18.8456	3.32665	397.128	317.11	9.17	0	8.29079	2331.07	9.14249	9.18036	1	nan	nan
01/04/2018 00:50	nan	-161.074	-61.9671	12.732	nan	0	33.4636	2.6227	3.22684	18.8517	3.30468	397.536	317.396	8.7	0	7.86585	2341.64	8.2787	8.24475	1	nan	nan
01/04/2018 01:00	nan	-161.018	-61.989	12.383	nan	0	33.4751	2.5813	3.10795	18.8599	3.15686	398.624	318.152	9.95	0	8.996	2358.61	10.5724	10.7453	1	nan	nan
01/04/2018 01:10	nan	-160.961	-62.0111	12.508	nan	0	33.4778	2.55392	2.97527	18.8696	3.07662	398.967	318.373	9.14	0	8.26367	2377.71	8.99777	9.0305	1	nan	nan
01/04/2018 01:20	nan	-160.904	-62.0333	12.898	nan	0	33.4824	2.56129	2.84432	18.8834	2.90177	399.031	318.311	9.7	0	8.76997	2396.74	10.0043	10.1305	1	nan	nan
01/04/2018 01:30	nan	-160.848	-62.0558	12.859	nan	0	33.4862	2.53388	2.84101	18.899	2.8719	398.923	318.199	9.76	0	8.82422	2397.22	10.1183	10.2552	1	nan	nan
01/04/2018 01:40	nan	-160.79	-62.0779	12.593	1.76833	0	33.4741	2.54587	2.82548	18.9246	2.87077	398.925	318.226	8.95	0	8.09188	2399.49	8.61633	8.61956	1	nan	nan
01/04/2018 01:50	2.25225	-160.732	-62.0995	12.567	1.14547	0	33.4746	2.60549	2.82407	18.9575	2.85998	399.039	318.309	9.96	0	9.00505	2399.7	10.5011	10.6743	1	5.67625	5.76988
01/04/2018 02:00	0.0866033	-160.674	-62.1213	12.75	1.16849	0	33.5059	2.61221	2.91561	18.9942	2.92764	398.214	317.624	9.48	0	8.57107	2386.36	9.60884	9.69723	1	0.199718	0.201555
01/04/2018 02:10	nan	-160.617	-62.1436	12.797	1.71197	0	33.5013	2.61527	2.90172	19.0315	2.9437	398.36	317.76	9.4	0	8.49874	2388.38	9.45533	9.53022	1	nan	nan
01/04/2018 02:20	1.26671	-160.56	-62.1663	12.733	1.5581	0	33.4998	2.60252	2.89341	19.0675	2.93749	398.508	317.877	8.81	0	7.96531	2389.59	8.38696	8.3693	1	2.54972	2.54435
01/04/2018 02:30	nan	-160.502	-62.1892	12.743	2.19365	0	33.4923	2.60489	2.87669	19.1014	2.91541	398.957	318.239	9.11	0	8.23654	2392.02	8.91653	8.94444	1	nan	nan
01/04/2018 02:40	1.87781	-160.445	-62.2121	12.828	-0.196701	0	33.482	2.60697	2.87744	19.1287	2.91315	398.779	318.118	9.67	0	8.74285	2391.91	9.95703	10.0781	1	4.48739	4.54196
01/04/2018 02:50	1.68122	-160.387	-62.2345	12.826	0.328007	0	33.4703	2.60132	2.90048	19.1515	2.93534	398.466	317.906	8.91	0	8.05572	2388.56	8.56502	8.56222	1	3.45592	3.45479
01/04/2018 03:00	nan	-160.329	-62.2564	12.56	1.19251	0	33.4772	2.59659	2.88852	19.1738	2.92652	398.632	318.019	9.64	0	8.71573	2390.3	9.9032	10.0191	1	nan	nan
01/04/2018 03:10	nan	-160.27	-62.2782	12.788	2.25534	0	33.4738	2.61698	2.90331	19.1938	2.93608	398.376	317.827	10.52	0	9.51135	2388.15	11.6542	11.9371	1	nan	nan
01/04/2018 03:20	0.258858	-160.211	-62.3001	12.436	1.62385	0	33.4728	2.64822	2.91201	19.2112	2.93756	398.452	317.891	10.22	0	9.24012	2386.88	11.0459	11.269	1	0.686233	0.700096
01/04/2018 03:30	11.2786	-160.152	-62.3217	12.67	1.2769	0	33.4641	2.6353	2.96314	19.2302	2.98752	397.855	317.463	9.94	0	8.98696	2379.47	10.5063	10.6766	1	28.4392	28.9
01/04/2018 03:40	0.318954	-160.093	-62.3431	12.577	1.10518	0	33.4677	2.61083	2.95124	19.2498	2.998	397.88	317.481	9.6	0	8.67956	2381.19	9.84597	9.95507	1	0.753699	0.76205
01/04/2018 03:50	2.78886	-160.035	-62.3649	12.431	1.22563	0	33.4701	2.60625	2.91235	19.2704	2.95773	398.396	317.864	9.93	0	8.97792	2386.83	10.4705	10.6386	1	7.0082	7.12073
01/04/2018 04:00	nan	-159.978	-62.3871	12.484	0.953992	0	33.4767	2.61029	2.90379	19.2916	2.93387	398.852	318.2	9.75	0	8.81518	2388.08	10.1184	10.2538	1	nan	nan
01/04/2018 04:10	nan	-159.921	-62.409	12.485	0.494247	0	33.4829	2.60019	2.91843	19.3124	2.95281	398.861	318.204	9.49	0	8.58011	2385.95	9.62844	9.71853	1	nan	nan
01/04/2018 04:20	nan	-159.863	-62.4311	12.584	-0.0391211	0	33.5094	2.60485	2.91046	19.3325	2.93969	398.62	317.947	9.69	0	8.76093	2387.11	10.0053	10.13	1	nan	nan
01/04/2018 04:30	2.67375	-159.805	-62.4532	12.643	1.80312	0	33.5133	2.57242	2.92225	19.3524	2.94994	398.311	317.698	9.73	0	8.7971	2385.4	10.0856	10.2175	1	6.47195	6.55657
01/04/2018 04:40	4.7164	-159.746	-62.4753	12.655	0.964701	0	33.512	2.36574	2.89214	19.374	2.94986	398.518	317.866	9.86	0	8.91463	2389.77	10.3276	10.4827	1	11.6902	11.8658
01/04/2018 04:50	6.77952	-159.688	-62.4976	12.506	2.69887	0	33.5197	2.22478	2.59145	19.3939	2.70671	402.93	321.223	10.4	0	9.40286	2433.98	11.2998	11.556	1	18.3857	18.8025
01/04/2018 05:00	0.0019646	-159.63	-62.5196	12.546	2.53901	0	33.5468	2.04274	2.53355	19.4132	2.5529	404.546	322.359	10.33	0	9.33957	2442.61	11.1389	11.3808	1	0.00525201	0.00536608
01/04/2018 05:10	nan	-159.571	-62.5416	12.415	3.14095	0	33.5862	1.97694	2.42252	19.4326	2.50685	405.742	323.199	10.6	0	9.58368	2459.23	11.6478	11.9429	1	nan	nan
01/04/2018 05:20	1.06253	-159.513	-62.5636	12.597	1.01238	0	33.5866	1.96148	2.37874	19.4526	2.41905	405.514	322.962	10.58	0	9.5656	2465.83	11.5914	11.882	1	2.95589	3.03
01/04/2018 05:30	6.12657	-159.455	-62.5856	12.578	1.74041	0	33.5912	1.9645	2.41213	19.4687	2.43046	405.265	322.761	10.01	0	9.05025	2460.8	10.4668	10.647	1	15.3901	15.6552
01/04/2018 05:40	nan	-159.398	-62.6075	12.291	1.31803	0	33.6079	1.9799	2.43946	19.4873	2.45567	404.728	322.313	10.09	0	9.12258	2456.69	10.6317	10.827	1	nan	nan
01/04/2018 05:50	nan	-159.34	-62.6292	12.353	-0.409532	0	33.6245	1.98212	2.47857	19.5073	2.50689	403.004	320.934	10.97	0	9.91821	2450.82	12.4395	12.8132	1	nan	nan
01/04/2018 06:00	nan	-159.283	-62.6508	12.298	1.62449	0	33.6202	2.01969	2.48387	19.528	2.51346	403.014	320.955	10.72	0	9.69218	2450.03	11.9173	12.2378	1	nan	nan
01/04/2018 06:10	nan	-159.225	-62.6724	12.52	0.605402	0	33.609	2.03699	2.52143	19.5448	2.53468	403.971	321.755	10.51	0	9.50231	2444.41	11.4989	11.7765	1	nan	nan
01/04/2018 06:20	1.16468	-159.167	-62.6941	12.263	1.63944	0	33.6093	2.04478	2.55049	19.5624	2.58077	404.315	322.056	10.77	0	9.73738	2440.08	12.0458	12.3774	1	3.36706	3.45975
01/04/2018 06:30	nan	-159.11	-62.7157	12.407	2.03217	0	33.6087	2.03485	2.56432	19.5806	2.59503	404.172	321.952	10.87	0	9.8278	2438.02	12.2606	12.6136	1	nan	nan
01/04/2018 06:40	1.49079	-159.053	-62.7373	12.368	1.53167	0	33.6118	2.01464	2.54013	19.6008	2.57707	404.195	321.953	11.14	0	10.0719	2441.62	12.8264	13.2382	1	4.58915	4.73649
01/04/2018 06:50	nan	-158.995	-62.7592	12.399	2.01353	0	33.6125	1.99693	2.52007	19.6124	2.55957	404.127	321.886	11.24	0	10.1623	2444.62	13.0347	13.4687	1	nan	nan
01/04/2018 07:00	nan	-158.937	-62.7814	12.439	0.855729	0	33.6134	1.9727	2.48718	19.6176	2.52715	404.256	321.968	10.84	0	9.80067	2449.53	12.1688	12.5146	1	nan	nan
01/04/2018 07:10	0.263159	-158.879	-62.8033	12.612	0.574934	0	33.6112	1.95528	2.4759	19.6222	2.50923	404.22	321.933	10.64	0	9.61985	2451.22	11.7491	12.0529	1	0.742051	0.761237
01/04/2018 07:20	nan	-158.821	-62.8251	12.489	1.90093	0	33.611	1.94814	2.46792	19.6288	2.49912	404.168	321.886	10.95	0	9.90013	2452.42	12.3931	12.7623	1	nan	nan
01/04/2018 07:30	2.37424	-158.763	-62.847	12.585	1.24853	0	33.6131	1.94252	2.46578	19.6402	2.49571	404.171	321.882	11.18	0	10.1081	2452.74	12.8834	13.3032	1	7.3412	7.58041
01/04/2018 07:40	0.502899	-158.704	-62.869	12.592	1.53441	0	33.6116	1.93158	2.46912	19.6533	2.50637	403.797	321.593	11.52	0	10.4155	2452.24	13.6282	14.1261	1	1.64486	1.70496
01/04/2018 07:50	4.03917	-158.644	-62.8909	12.674	1.75274	0	33.6185	1.92998	2.439	19.6684	2.47581	404.198	321.879	11.47	0	10.3703	2456.76	13.5051	13.9909	1	13.0919	13.5628
01/04/2018 08:00	3.77832	-158.584	-62.9127	12.651	1.11141	0	33.6148	1.92615	2.44355	19.6845	2.47266	403.818	321.583	11.29	0	10.2075	2456.07	13.1127	13.5571	1	11.8906	12.2935
01/04/2018 08:10	0.797367	-158.524	-62.9346	12.785	2.59661	0	33.6087	1.95748	2.4413	19.6989	2.47543	404.193	321.896	11.3	0	10.2166	2456.41	13.1336	13.5802	1	2.51335	2.59881
01/04/2018 08:20	nan	-158.464	-62.9567	12.862	3.26456	0	33.5883	1.98601	2.47015	19.7146	2.47725	404.498	322.185	10.56	0	9.54752	2452.08	11.5829	11.8702	1	nan	nan
01/04/2018 08:30	4.52415	-158.403	-62.9789	12.782	1.50994	0	33.5772	1.95551	2.52672	19.7314	2.54865	405.161	322.781	10.39	0	9.39382	2443.62	11.2573	11.511	1	12.2231	12.4986
01/04/2018 08:40	10.6616	-158.343	-63.0013	12.709	3.79782	0	33.5921	1.9264	2.4638	19.7483	2.51001	405.175	322.736	9.68	0	8.75189	2453.04	9.85105	9.97235	1	25.2066	25.517
01/04/2018 08:50	0.638635	-158.283	-63.0236	12.713	2.59007	0	33.5965	1.96761	2.43548	19.7618	2.47147	405.044	322.599	9.55	0	8.63436	2457.29	9.59902	9.6979	1	1.47127	1.48642
01/04/2018 09:00	nan	-158.223	-63.0458	12.786	2.67887	0	33.6018	1.96961	2.47912	19.7803	2.47809	404.587	322.227	9.77	0	8.83326	2450.74	10.0263	10.1634	1	nan	nan
01/04/2018 09:10	nan	-158.163	-63.0681	12.799	1.13883	0	33.6145	1.97975	2.49568	19.8029	2.53086	403.718	321.539	9.31	0	8.41737	2448.26	9.17429	9.23356	1	nan	nan
01/04/2018 09:20	0.964295	-158.103	-63.0903	12.688	2.03989	0	33.6319	1.99828	2.46736	19.8316	2.4962	403.057	320.953	9.09	0	8.21846	2452.5	8.77025	8.79472	1	2.0297	2.03537
01/04/2018 09:30	nan	-158.044	-63.1127	12.73	0.861414	0	33.64	2.01041	2.49086	19.8593	2.50528	402.381	320.403	9.71	0	8.77902	2448.98	9.91592	10.0426	1	nan	nan
01/04/2018 09:40	nan	-157.985	-63.1351	12.623	1.8775	0	33.6443	1.9743	2.4984	19.8868	2.52836	402.379	320.406	10.01	0	9.05025	2447.85	10.4944	10.6752	1	nan	nan
01/04/2018 09:50	nan	-157.927	-63.1576	12.526	2.44016	0	33.6725	1.96262	2.42128	19.9147	2.46887	402.862	320.694	9.59	0	8.67052	2459.42	9.66942	9.77507	1	nan	nan
01/04/2018 10:00	3.15935	-157.868	-63.1801	12.715	1.72265	0	33.6678	1.95978	2.41832	19.9421	2.43746	402.919	320.73	9.62	0	8.69764	2459.87	9.72466	9.83543	1	7.37366	7.45765
01/04/2018 10:10	nan	-157.81	-63.2027	12.546	3.08487	0	33.6801	1.95859	2.41235	19.9674	2.44501	403.098	320.85	9.39	0	8.4897	2460.76	9.2969	9.36904	1	nan	nan
01/04/2018 10:20	1.95484	-157.752	-63.2252	12.608	1.27939	0	33.6941	1.99486	2.42062	19.9943	2.43659	405.465	322.699	9.49	0	8.58011	2459.52	9.48335	9.57208	1	4.44923	4.49086
01/04/2018 10:30	0.834519	-157.69	-63.2461	12.464	1.29931	0	33.6911	2.02305	2.46416	20.0181	2.47579	405.799	322.995	10.32	0	9.33053	2452.98	11.0953	11.3347	1	2.22221	2.27017
01/04/2018 10:40	0.0271667	-157.63	-63.2675	12.482	2.6536	0	33.6961	2.03347	2.51534	20.0418	2.52489	405.023	322.397	9.94	0	8.98696	2445.32	10.3639	10.5318	1	0.0675728	0.0686676
01/04/2018 10:50	nan	-157.57	-63.2891	12.537	2.31685	0	33.7068	2.0446	2.52274	20.0646	2.55057	404.611	322.06	8.82	0	7.97435	2444.22	8.31004	8.29404	1	nan	nan
01/04/2018 11:00	2.91179	-157.51	-63.3108	12.621	1.29219	0	33.6989	2.06161	2.51719	20.0902	2.54225	404.514	321.995	8.92	0	8.06476	2445.05	8.48302	8.48174	1	5.9282	5.9273
01/04/2018 11:10	nan	-157.451	-63.3329	12.462	1.01134	0	33.7031	2.06464	2.52435	20.1145	2.54219	404.339	321.847	9.81	0	8.86943	2443.98	10.1165	10.261	1	nan	nan
01/04/2018 11:20	3.3318	-157.391	-63.355	12.509	1.14609	0	33.7057	2.08345	2.53409	20.1407	2.55509	404.316	321.831	10.3	0	9.31245	2442.52	11.0789	11.315	1	8.85906	9.04783
01/04/2018 11:30	0.00100517	-157.332	-63.3768	12.623	1.34881	0	33.7033	2.0809	2.54511	20.164	2.56975	404.172	321.731	10.26	0	9.27628	2440.88	11.0027	11.231	1	0.0026543	0.00270939
01/04/2018 11:40	1.1573	-157.272	-63.3987	12.297	1.84323	0	33.6989	2.08689	2.55508	20.1861	2.57744	404.14	321.719	9.48	0	8.57107	2439.4	9.50382	9.59123	1	2.63971	2.66399
01/04/2018 11:50	nan	-157.213	-63.4206	12.323	1.89022	0	33.6998	2.08758	2.55763	20.2079	2.58132	404.148	321.726	8.97	0	8.10997	2439.02	8.58148	8.58769	1	nan	nan
01/04/2018 12:00	nan	-157.153	-63.4421	12.453	1.49952	0	33.709	2.07342	2.55647	20.2289	2.58949	404.173	321.73	8.86	0	8.01051	2439.19	8.38823	8.37806	1	nan	nan
01/04/2018 12:10	nan	-157.094	-63.464	12.496	1.8942	0	33.712	2.04345	2.54378	20.2498	2.5721	404.554	322.016	9.41	0	8.50778	2441.08	9.37112	9.44685	1	nan	nan
01/04/2018 12:20	nan	-157.035	-63.4862	12.418	2.56793	0	33.7113	2.04392	2.5	20.2677	2.5457	404.807	322.203	9.34	0	8.44449	2447.62	9.23024	9.29439	1	nan	nan
01/04/2018 12:30	nan	-156.975	-63.5085	12.495	1.97915	0	33.7114	2.06634	2.4922	20.2873	2.50471	405.485	322.719	8.89	0	8.03764	2448.78	8.42408	8.41835	1	nan	nan
01/04/2018 12:40	1.74477	-156.915	-63.5299	12.264	0.855664	0	33.7113	2.01195	2.54266	20.3076	2.56226	404.57	322.025	8.58	0	7.75736	2441.25	7.90358	7.85358	1	3.30958	3.28864
01/04/2018 12:50	nan	-156.853	-63.5507	12.477	0.475269	0	33.7108	1.94976	2.48754	20.3273	2.54572	405.253	322.56	8.63	0	7.80256	2449.48	7.97502	7.93202	1	nan	nan
01/04/2018 13:00	0.441088	-156.793	-63.5725	12.419	3.43736	0	33.7064	1.9169	2.35609	20.3479	2.40869	407.956	324.637	8.67	0	7.83873	2469.24	8.01088	7.97361	1	0.84804	0.844095
01/04/2018 13:10	3.07982	-156.734	-63.595	12.395	2.63669	0	33.7058	1.90254	2.33702	20.3671	2.36971	408.552	325.089	8.49	0	7.67599	2472.13	7.70336	7.64151	1	5.694	5.64828
01/04/2018 13:20	nan	-156.676	-63.6178	12.415	2.37568	0	33.7051	1.91463	2.34154	20.3881	2.36423	408.504	325.049	10.35	0	9.35765	2471.44	11.1136	11.3581	1	nan	nan
01/04/2018 13:30	nan	-156.617	-63.6396	12.327	3.48601	0	33.7047	1.91655	2.35529	20.4072	2.37688	408.34	324.927	10.34	0	9.34861	2469.36	11.0983	11.3409	1	nan	nan
01/04/2018 13:40	nan	-156.557	-63.6611	12.259	0.879207	0	33.7042	1.92233	2.37579	20.4251	2.3883	408.118	324.759	10.92	0	9.873	2466.27	12.2951	12.6568	1	nan	nan
01/04/2018 13:50	1.23685	-156.496	-63.6822	12.324	1.45812	0	33.7037	1.89268	2.391	20.4416	2.40296	407.997	324.672	10.66	0	9.63793	2463.98	11.7598	12.0669	1	3.4908	3.58197
01/04/2018 14:00	4.24222	-156.436	-63.7032	12.182	1.64309	0	33.6965	1.87569	2.37147	20.4573	2.39496	408.334	324.951	10.56	0	9.54752	2466.92	11.548	11.8345	1	11.7574	12.0491
01/04/2018 14:10	2.46675	-156.376	-63.7243	12.24	2.13089	0	33.693	1.838	2.33214	20.4707	2.35754	408.891	325.38	11.86	0	10.7229	2472.86	14.3322	14.9097	1	8.48495	8.82682
01/04/2018 14:20	1.32152	-156.316	-63.7456	12.125	1.62418	0	33.6915	1.77807	2.29569	20.4664	2.31791	409.048	325.484	11.83	0	10.6958	2478.39	14.2483	14.8178	1	4.51906	4.69967
01/04/2018 14:30	nan	-156.257	-63.7671	12.157	1.21268	0	33.6918	1.71011	2.26883	20.4313	2.28756	409.17	325.561	11.43	0	10.3341	2482.46	13.3474	13.8213	1	nan	nan
01/04/2018 14:40	nan	-156.197	-63.7884	12.39	0.242025	0	33.6914	1.64221	2.22689	20.3779	2.23702	409.297	325.632	11.08	0	10.0177	2488.85	12.5765	12.9712	1	nan	nan
01/04/2018 14:50	2.91384	-156.138	-63.8104	12.217	0.337407	0	33.6909	1.58661	2.1995	20.3122	2.20583	409.29	325.608	10.72	0	9.69218	2493.02	11.8141	12.1318	1	8.26186	8.48402
01/04/2018 15:00	7.80786	-156.079	-63.8325	12.381	1.26306	0	33.6911	1.55952	2.18364	20.244	2.19198	409.15	325.488	10.12	0	9.14971	2495.45	10.6072	10.8065	1	19.8766	20.2502
01/04/2018 15:10	nan	-156.018	-63.8536	12.328	0.595138	0	33.6904	1.5294	2.19021	20.1776	2.18085	409.152	325.485	10.64	0	9.61985	2494.44	11.6469	11.948	1	nan	nan
01/04/2018 15:20	4.90756	-155.95	-63.87	12.385	1.85374	0	33.691	1.5135	2.18508	20.1202	2.19693	409.254	325.574	11.7	0	10.5782	2495.23	13.9088	14.4449	1	16.382	17.0135
01/04/2018 15:30	nan	-155.881	-63.8859	12.433	1.19499	0	33.6908	1.49489	2.15093	20.0663	2.16144	409.208	325.516	12.95	0	11.7084	2500.45	16.8176	17.6778	1	nan	nan
01/04/2018 15:40	0.17151	-155.812	-63.902	12.465	-0.104983	0	33.6907	1.4604	2.14776	20.0127	2.15405	408.994	325.341	12.39	0	11.2021	2500.94	15.4721	16.1804	1	0.636867	0.666024
01/04/2018 15:50	6.48718	-155.744	-63.9181	12.345	0.837297	0	33.6883	1.43268	2.1003	19.9619	2.12088	409.529	325.752	12.62	0	11.41	2508.22	15.994	16.7623	1	24.9015	26.0977
01/04/2018 16:00	6.40719	-155.675	-63.9342	12.428	2.15545	0	33.6862	1.41748	2.08454	19.911	2.09518	409.866	326.009	12.85	0	11.618	2510.65	16.5399	17.3705	1	25.4337	26.711
01/04/2018 16:10	nan	-155.607	-63.9503	12.274	1.11504	0	33.6824	1.39954	2.06108	19.8626	2.07287	409.773	325.93	12.8	0	11.5727	2514.26	16.4069	17.2232	1	nan	nan
01/04/2018 16:20	nan	-155.538	-63.9665	12.518	-0.0492425	0	33.6826	1.42039	2.05211	19.8107	2.04868	409.671	325.833	11.49	0	10.3884	2515.65	13.3897	13.8744	1	nan	nan
01/04/2018 16:30	nan	-155.469	-63.9828	12.435	0.660311	0	33.6835	1.43251	2.09815	19.7601	2.08911	409.276	325.542	11.78	0	10.6505	2508.55	14.0503	14.6042	1	nan	nan
01/04/2018 16:40	0.706367	-155.4	-63.9987	12.328	0.66966	0	33.6852	1.4378	2.11339	19.7098	2.11286	408.896	325.25	11.72	0	10.5963	2506.21	13.9228	14.4626	1	2.36031	2.45181
01/04/2018 16:50	nan	-155.33	-64.0149	12.302	2.6473	0	33.6858	1.42824	2.11979	19.6624	2.11325	409.182	325.477	11.97	0	10.8223	2505.23	14.4883	15.0891	1	nan	nan
01/04/2018 17:00	0.147897	-155.261	-64.0312	12.465	1.9526	0	33.6815	1.40982	2.11188	19.6142	2.11367	409.15	325.461	11.58	0	10.4697	2506.44	13.6119	14.1185	1	0.483157	0.501137
01/04/2018 17:10	0.679971	-155.192	-64.0474	12.467	1.18431	0	33.675	1.38118	2.08529	19.5638	2.0894	409.473	325.717	10.95	0	9.90013	2510.53	12.2489	12.6137	1	1.99893	2.05848
01/04/2018 17:20	nan	-155.122	-64.0637	12.507	0.898032	0	33.668	1.38005	2.06516	19.5097	2.06843	409.595	325.817	10.96	0	9.90917	2513.63	12.2622	12.629	1	nan	nan
01/04/2018 17:30	nan	-155.053	-64.0797	12.394	0.63261	0	33.6715	1.32962	2.07166	19.4287	2.06536	409.369	325.628	11.02	0	9.96341	2512.63	12.3904	12.7702	1	nan	nan
01/04/2018 17:40	nan	-154.984	-64.096	12.357	1.32649	0	33.6636	1.2903	2.05523	19.326	2.06928	409.172	325.491	11.04	0	9.9815	2515.16	12.4262	12.8101	1	nan	nan
01/04/2018 17:50	nan	-154.915	-64.1121	12.393	0.702729	0	33.661	1.27542	2.0373	19.2393	2.04919	409.111	325.436	11.2	0	10.1262	2517.93	12.7581	13.1769	1	nan	nan
01/04/2018 18:00	nan	-154.845	-64.1283	12.366	3.14572	0	33.6555	1.26883	2.01752	19.1707	2.02478	409.117	325.438	11.03	0	9.97246	2520.99	12.3909	12.7722	1	nan	nan
01/04/2018 18:10	0.732546	-154.776	-64.1445	12.442	0.831842	0	33.6573	1.26964	2.01266	19.1059	2.02363	409.006	325.345	10.64	0	9.61985	2521.74	11.5837	11.8832	1	2.03653	2.08919
01/04/2018 18:20	nan	-154.706	-64.1607	12.524	1.46304	0	33.6596	1.27721	2.00986	19.0459	2.02066	409.073	325.391	10.48	0	9.47519	2522.17	11.2601	11.5275	1	nan	nan
01/04/2018 18:30	nan	-154.637	-64.1768	12.263	1.71144	0	33.6611	1.28786	2.01565	18.9916	2.01902	409.122	325.426	10.58	0	9.5656	2521.28	11.4632	11.7506	1	nan	nan
01/04/2018 18:40	0.162489	-154.567	-64.193	12.611	-0.532398	0	33.6611	1.29143	2.01731	18.9478	2.02278	408.975	325.311	10.51	0	9.50231	2521.02	11.3228	11.5962	1	0.441558	0.45222
01/04/2018 18:50	nan	-154.498	-64.2094	12.405	1.24772	0	33.6586	1.29792	2.01729	18.905	2.01895	409.113	325.424	10.26	0	9.27628	2521.02	10.8264	11.0511	1	nan	nan
01/04/2018 19:00	nan	-154.428	-64.2259	12.4	0.567299	0	33.657	1.25979	2.00945	18.8611	2.01559	409.34	325.606	10.36	0	9.36669	2522.24	11.021	11.2649	1	nan	nan
01/04/2018 19:10	0.0930245	-154.359	-64.2422	12.191	1.40624	0	33.653	1.25619	1.96362	18.8288	1.9783	409.434	325.667	10.25	0	9.26724	2529.34	10.789	11.0114	1	0.240873	0.24584
01/04/2018 19:20	nan	-154.29	-64.2583	12.699	1.91084	0	33.6512	1.26896	1.94595	18.8303	1.96122	409.397	325.631	10.17	0	9.19491	2532.08	10.6271	10.8343	1	nan	nan
01/04/2018 19:30	4.99344	-154.22	-64.2744	12.481	1.20828	0	33.6488	1.3116	1.9383	18.8541	1.95317	409.384	325.621	9.74	0	8.80614	2533.27	9.80549	9.93518	1	11.7512	11.9066
01/04/2018 19:40	nan	-154.15	-64.2906	12.425	0.437106	0	33.643	1.32341	1.94121	18.8903	1.94978	409.575	325.784	9.27	0	8.3812	2532.82	8.94834	9.00029	1	nan	nan
01/04/2018 19:50	1.49291	-154.08	-64.3067	12.394	1.53732	0	33.6412	1.34417	1.93481	18.9323	1.95235	409.325	325.59	9.59	0	8.67052	2533.81	9.52642	9.6305	1	3.4133	3.45059
01/04/2018 20:00	nan	-154.011	-64.3228	12.56	0.0987258	0	33.6397	1.36441	1.91799	18.9748	1.94131	409.225	325.507	9.64	0	8.71573	2536.43	9.61369	9.72616	1	nan	nan
01/04/2018 20:10	9.88108	-153.941	-64.3391	12.387	0.790529	0	33.6408	1.38301	1.91716	19.0165	1.93197	409.332	325.584	9.76	0	8.82422	2536.56	9.83648	9.96956	1	23.3268	23.6424
01/04/2018 20:20	4.75141	-153.871	-64.3554	12.389	0.474682	0	33.6412	1.39312	1.94628	19.0571	1.96056	409.743	325.928	9.81	0	8.86943	2532.03	9.93904	10.081	1	11.3339	11.4957
01/04/2018 20:30	2.30896	-153.801	-64.3712	12.34	2.20692	0	33.6349	1.38733	1.94278	19.0981	1.96794	409.898	326.07	10.01	0	9.05025	2532.58	10.3174	10.4951	1	5.7174	5.81585
01/04/2018 20:40	nan	-153.731	-64.3869	12.673	2.72923	0	33.6337	1.40435	1.93644	19.1393	1.96131	409.912	326.079	9.82	0	8.87847	2533.56	9.95484	10.0985	1	nan	nan
01/04/2018 20:50	nan	-153.661	-64.4026	12.49	1.24667	0	33.636	1.42282	1.94733	19.1813	1.96596	409.9	326.067	9.71	0	8.77902	2531.87	9.75226	9.87681	1	nan	nan
01/04/2018 21:00	3.4407	-153.59	-64.4183	12.366	1.86804	0	33.638	1.41441	1.97331	19.2243	1.9936	410.109	326.247	9.79	0	8.85135	2527.84	9.90969	10.0482	1	8.1831	8.2975
01/04/2018 21:10	2.66595	-153.521	-64.4343	12.394	2.09169	0	33.6299	1.4184	1.95816	19.2656	1.98817	409.978	326.157	9.82	0	8.87847	2530.19	9.96148	10.1052	1	6.37364	6.46561
01/04/2018 21:20	nan	-153.451	-64.4505	12.526	1.81889	0	33.6243	1.41836	1.93987	19.3089	1.96554	409.492	325.769	9.64	0	8.71573	2533.03	9.62014	9.73269	1	nan	nan
01/04/2018 21:30	nan	-153.381	-64.4666	12.215	3.53323	0	33.6231	1.4108	1.94318	19.3522	1.97106	409.25	325.582	9.74	0	8.80614	2532.51	9.80696	9.93667	1	nan	nan
01/04/2018 21:40	nan	-153.312	-64.4828	12.579	0.987756	0	33.6117	1.4131	1.9255	19.3934	1.9567	409.967	326.169	9.3	0	8.40833	2535.26	8.99761	9.05427	1	nan	nan
01/04/2018 21:50	nan	-153.242	-64.4995	12.418	2.51434	0	33.6001	1.42145	1.93715	19.4343	1.96407	410	326.226	9.43	0	8.52586	2533.45	9.2349	9.3125	1	nan	nan
01/04/2018 22:00	nan	-153.173	-64.5162	12.304	1.106	0	33.6164	1.42522	1.93587	19.4738	1.9648	409.848	326.069	9.2	0	8.31791	2533.65	8.82245	8.86342	1	nan	nan
01/04/2018 22:10	nan	-153.103	-64.5326	12.544	3.41593	0	33.6288	1.42187	1.939	19.5119	1.96736	410.251	326.363	9.5	0	8.58915	2533.16	9.36272	9.4518	1	nan	nan
01/04/2018 22:20	7.84754	-153.032	-64.5483	12.354	2.97273	0	33.6255	1.42097	1.94314	19.5489	1.96419	409.756	325.976	9.41	0	8.50778	2532.52	9.20039	9.27474	1	17.3281	17.4681
01/04/2018 22:30	nan	-152.961	-64.5641	12.482	1.90058	0	33.6264	1.43937	1.94319	19.5874	1.9588	409.573	325.825	10.16	0	9.18587	2532.51	10.6068	10.8121	1	nan	nan
01/04/2018 22:40	nan	-152.89	-64.5799	12.42	nan	0	33.6286	1.45064	1.96259	19.6374	1.97661	409.787	326	9.97	0	9.01409	2529.5	10.2472	10.4177	1	nan	nan
01/04/2018 22:50	nan	-152.819	-64.5959	12.483	nan	0	33.6313	1.46801	1.95868	19.6847	1.98386	409.978	326.151	9.77	0	8.83326	2530.11	9.86775	10.0027	1	nan	nan
01/04/2018 23:00	nan	-152.749	-64.6122	12.296	nan	0	33.6303	1.4931	1.95602	19.7297	1.97191	410.149	326.282	9.98	0	9.02313	2530.52	10.2642	10.4365	1	nan	nan
01/04/2018 23:10	nan	-152.682	-64.6293	12.059	nan	0	33.5784	1.51388	1.97871	19.771	1.98464	409.991	326.279	9.52	0	8.60723	2527	9.4107	9.50321	1	nan	nan
01/04/2018 23:20	nan	-152.613	-64.6449	12.179	nan	0	33.5749	1.51116	1.99284	19.8109	2.00666	409.815	326.161	9.37	0	8.47161	2524.81	9.1421	9.21009	1	nan	nan
01/04/2018 23:30	nan	-152.54	-64.6599	12.591	nan	0	33.5898	1.51339	1.97865	19.8512	1.99935	409.9	326.191	10.18	0	9.20395	2527.01	10.6572	10.8665	1	nan	nan
01/04/2018 23:40	nan	-152.467	-64.675	12.642	nan	0	33.5975	1.51554	1.9662	19.8904	1.97796	409.695	325.997	9.91	0	8.95984	2528.94	10.1341	10.2938	1	nan	nan
01/04/2018 23:50	nan	-152.396	-64.6919	12.432	nan	0	33.6005	1.50912	1.96711	19.9277	1.98475	409.931	326.183	9.6	0	8.67956	2528.8	9.55429	9.66016	1	nan	nan
02/04/2018 00:00	nan	-152.327	-64.7095	12.493	nan	0	33.6101	1.51819	1.96677	19.967	1.98357	410.165	326.347	8.8	0	7.95627	2528.85	8.13572	8.11713	1	nan	nan
02/04/2018 00:10	nan	-152.256	-64.7256	12.298	nan	0	33.5952	1.53697	1.9614	20.005	1.97264	410.489	326.631	8.66	0	7.82969	2529.68	7.89782	7.85962	1	nan	nan
02/04/2018 00:20	nan	-152.184	-64.7416	12.556	nan	0	33.5816	1.52691	1.99176	20.0433	2.00246	410.286	326.518	9.2	0	8.31791	2524.97	8.83759	8.87863	1	nan	nan
02/04/2018 00:30	nan	-152.114	-64.7584	12.617	nan	0	33.5773	1.51596	1.97035	20.0806	1.99156	409.652	326.017	8.98	0	8.11901	2528.29	8.44594	8.45352	1	nan	nan
02/04/2018 00:40	nan	-152.045	-64.777	12.475	nan	0	33.5805	1.51607	1.93344	20.1184	1.94875	409.414	325.794	8.86	0	8.01051	2534.03	8.22976	8.21979	1	nan	nan
02/04/2018 00:50	nan	-151.979	-64.7965	12.521	nan	0	33.5904	1.51169	1.94727	20.1547	1.95222	409.57	325.898	8.53	0	7.71215	2531.88	7.67793	7.62212	1	nan	nan
02/04/2018 01:00	nan	-151.912	-64.816	12.472	nan	0	33.5825	1.52599	1.95014	20.1901	1.96681	409.428	325.812	8.74	0	7.90202	2531.43	8.0298	8.00274	1	nan	nan
02/04/2018 01:10	12.1738	-151.844	-64.8351	12.643	-1.13831	0	33.569	1.52726	1.9641	20.2235	1.96908	407.987	324.696	8.98	0	8.11901	2529.26	8.44432	8.4519	1	24.6719	24.6941
02/04/2018 01:20	nan	-151.775	-64.8542	12.476	0.414459	0	33.5682	1.52585	1.98158	20.2581	1.98889	407.642	324.435	8.95	0	8.09188	2526.55	8.39688	8.40003	1	nan	nan
02/04/2018 01:30	nan	-151.707	-64.873	12.606	0.788049	0	33.5702	1.48825	1.96881	20.2912	1.98441	408.098	324.791	9.55	0	8.63436	2528.53	9.46282	9.5603	1	nan	nan
02/04/2018 01:40	nan	-151.638	-64.8918	12.538	0.377169	0	33.5727	1.45524	1.92611	20.3233	1.95764	408.333	324.956	9.17	0	8.29079	2535.17	8.76676	8.80307	1	nan	nan
02/04/2018 01:50	nan	-151.568	-64.9096	12.389	1.29761	0	33.5735	1.4479	1.8826	20.3524	1.90017	408.785	325.278	9.24	0	8.35408	2541.95	8.87891	8.92605	1	nan	nan
02/04/2018 02:00	1.07789	-151.497	-64.9265	12.492	0.380553	0	33.5726	1.42568	1.87683	20.379	1.88638	408.756	325.249	9.59	0	8.67052	2542.85	9.50948	9.61337	1	2.46004	2.48692
02/04/2018 02:10	nan	-151.426	-64.9434	12.431	0.078747	0	33.5728	1.42155	1.87107	20.4028	1.88461	408.522	325.062	9.48	0	8.57107	2543.75	9.30683	9.39244	1	nan	nan
02/04/2018 02:20	nan	-151.355	-64.9599	12.373	1.45748	0	33.5718	1.39942	1.86418	20.426	1.87424	408.549	325.079	9.5	0	8.58915	2544.83	9.34124	9.43012	1	nan	nan
02/04/2018 02:30	1.22974	-151.283	-64.9764	12.534	1.34091	0	33.5716	1.3927	1.85507	20.4463	1.86412	408.713	325.203	9.57	0	8.65244	2546.25	9.46645	9.56692	1	2.79391	2.82356
02/04/2018 02:40	nan	-151.214	-64.9948	12.526	-0.100439	0	33.5698	1.39448	1.85922	20.4649	1.87181	408.643	325.156	9.51	0	8.59819	2545.6	9.35802	9.44854	1	nan	nan
02/04/2018 02:50	nan	-151.145	-65.0135	12.311	0.731037	0	33.5655	1.39722	1.85377	20.4822	1.86508	408.791	325.28	9.37	0	8.47161	2546.45	9.10316	9.17086	1	nan	nan
02/04/2018 03:00	4.81277	-151.077	-65.0322	12.554	2.32495	0	33.5586	1.40393	1.86894	20.4991	1.87158	408.793	325.3	9.47	0	8.56203	2544.08	9.28806	9.37202	1	10.7283	10.8253
02/04/2018 03:10	nan	-151.008	-65.0509	12.383	0.931011	0	33.5481	1.40983	1.8913	20.5129	1.89734	408.98	325.489	9.81	0	8.86943	2540.59	9.92228	10.064	1	nan	nan
02/04/2018 03:20	nan	-150.936	-65.0672	12.359	1.53773	0	33.5493	1.40702	1.89825	20.5258	1.90963	408.859	325.398	10.04	0	9.07738	2539.51	10.3608	10.5437	1	nan	nan
02/04/2018 03:30	nan	-150.862	-65.0811	12.198	1.85445	0	33.5442	1.41281	1.89091	20.5382	1.90179	408.241	324.912	11.35	0	10.2618	2540.65	13.0212	13.4716	1	nan	nan
02/04/2018 03:40	0.220868	-150.789	-65.0951	12.469	0.0493703	0	33.5423	1.38186	1.89876	20.549	1.90536	408.008	324.732	11.81	0	10.6777	2539.43	14.0314	14.5892	1	0.743781	0.773347
02/04/2018 03:50	nan	-150.715	-65.1092	12.314	1.31874	0	33.5438	1.42022	1.85154	20.5578	1.90112	407.761	324.53	11.77	0	10.6415	2546.8	13.9222	14.4695	1	nan	nan
02/04/2018 04:00	nan	-150.641	-65.1231	12.471	-0.352551	0	33.5434	1.41458	1.94039	20.5658	1.87021	407.681	324.448	11.89	0	10.75	2532.95	14.2285	14.8064	1	nan	nan
02/04/2018 04:10	nan	-150.567	-65.1371	12.23	1.53348	0	33.5411	1.37014	1.98162	20.573	2.04144	407.914	324.744	12.24	0	11.0664	2526.55	15.0448	15.7108	1	nan	nan
02/04/2018 04:20	nan	-150.493	-65.1509	12.371	1.02703	0	33.5414	1.33222	1.791	20.5793	1.83601	407.869	324.581	12.59	0	11.3829	2556.29	15.7721	16.5251	1	nan	nan
02/04/2018 04:30	nan	-150.419	-65.1647	12.248	0.600103	0	33.5397	1.32841	1.75286	20.5812	1.77693	407.798	324.493	12.86	0	11.627	2562.29	16.3964	17.2213	1	nan	nan
02/04/2018 04:40	nan	-150.346	-65.1786	12.277	0.898654	0	33.5437	1.31359	1.7442	20.5823	1.75945	408.025	324.654	12.84	0	11.6089	2563.66	16.344	17.1632	1	nan	nan
02/04/2018 04:50	nan	-150.272	-65.1925	12.294	2.32515	0	33.5395	1.30516	1.73256	20.5821	1.75176	408.322	324.894	13.11	0	11.853	2565.49	16.9923	17.8862	1	nan	nan
02/04/2018 05:00	nan	-150.199	-65.2062	12.085	1.1073	0	33.5358	1.28947	1.72732	20.58	1.74567	408.234	324.829	13.15	0	11.8892	2566.32	17.0876	17.9927	1	nan	nan
02/04/2018 05:10	nan	-150.125	-65.2199	12.305	2.7407	0	33.5346	1.28279	1.71958	20.5769	1.73943	408.2	324.801	13.75	0	12.4317	2567.54	18.5867	19.6674	1	nan	nan
02/04/2018 05:20	9.14032	-150.051	-65.2343	12.195	0.0138132	0	33.5328	1.28977	1.71146	20.5741	1.72877	407.612	324.331	13.68	0	12.3684	2568.82	18.4035	19.4627	1	40.3713	42.695
02/04/2018 05:30	0.741226	-149.979	-65.2487	12.108	0.631245	0	33.5314	1.27538	1.72223	20.5702	1.73898	407.719	324.425	13.49	0	12.1966	2567.12	17.929	18.9321	1	3.18947	3.36792
02/04/2018 05:40	nan	-149.905	-65.2625	12.191	1.87284	0	33.5246	1.25531	1.71304	20.5626	1.73687	408.599	325.139	13.76	0	12.4407	2568.57	18.6086	19.692	1	nan	nan
02/04/2018 05:50	nan	-149.831	-65.2763	12.324	0.355978	0	33.527	1.23406	1.68746	20.5535	1.71021	408.68	325.181	13.58	0	12.278	2572.61	18.1365	19.1651	1	nan	nan
02/04/2018 06:00	0.975912	-149.757	-65.2902	12.283	1.08847	0	33.5296	1.22589	1.67551	20.5438	1.6936	408.561	325.071	13.72	0	12.4045	2574.51	18.485	19.5551	1	4.32953	4.58017
02/04/2018 06:10	nan	-149.685	-65.3053	12.238	-0.968591	0	33.5286	1.21696	1.67201	20.5332	1.69102	408.844	325.297	13.67	0	12.3593	2575.06	18.3558	19.4107	1	nan	nan
02/04/2018 06:20	nan	-149.614	-65.3211	12.251	0.625377	0	33.5296	1.20701	1.67217	20.5206	1.68795	408.819	325.273	13.58	0	12.278	2575.04	18.1279	19.1561	1	nan	nan
02/04/2018 06:30	nan	-149.543	-65.337	12.201	-0.149906	0	33.5293	1.18364	1.67305	20.5076	1.68911	408.589	325.091	13.51	0	12.2147	2574.9	17.9521	18.9596	1	nan	nan
02/04/2018 06:40	0.963411	-149.472	-65.3527	12.136	1.96388	0	33.5295	1.17688	1.66612	20.4949	1.68979	408.332	324.886	13.26	0	11.9886	2575.99	17.3259	18.2605	1	4.00606	4.22218
02/04/2018 06:50	0.0969808	-149.4	-65.3684	12.283	1.44631	0	33.5297	1.16539	1.64809	20.4806	1.67097	408.636	325.116	13.11	0	11.853	2578.85	16.9482	17.8398	1	0.394477	0.41523
02/04/2018 07:00	4.89007	-149.329	-65.3842	12.107	1.06841	0	33.5299	1.14463	1.64078	20.468	1.65833	408.419	324.935	12.78	0	11.5547	2580.01	16.1488	16.9492	1	18.9525	19.8919
02/04/2018 07:10	0.485512	-149.259	-65.4008	12.163	0.0335179	0	33.5298	1.14274	1.62583	20.4564	1.65216	408.428	324.939	12.92	0	11.6812	2582.38	16.4764	17.3146	1	1.91988	2.01755
02/04/2018 07:20	2.29433	-149.189	-65.4178	12.151	0.0136496	0	33.5295	1.12961	1.61716	20.447	1.63773	408.563	325.038	12.57	0	11.3648	2583.76	15.6411	16.3849	1	8.6126	9.02215
02/04/2018 07:30	8.38766	-149.12	-65.435	12.201	-1.51742	0	33.5303	1.13643	1.6127	20.437	1.62907	408.59	325.053	12.66	0	11.4462	2584.47	15.8506	16.6181	1	31.9078	33.4528
02/04/2018 07:40	nan	-149.052	-65.4526	12.132	-1.14434	0	33.528	1.14639	1.622	20.428	1.63292	408.87	325.283	12.86	0	11.627	2582.99	16.3305	17.1522	1	nan	nan
02/04/2018 07:50	nan	-148.985	-65.4712	11.979	-1.0887	0	33.527	1.1355	1.6383	20.4183	1.65272	409.113	325.491	12.34	0	11.1569	2580.41	15.1165	15.801	1	nan	nan
02/04/2018 08:00	3.3524	-148.917	-65.4891	12.103	-0.184596	0	33.5304	1.13337	1.62639	20.4115	1.64687	409.109	325.476	12.39	0	11.2021	2582.3	15.2264	15.9235	1	12.2508	12.8116
02/04/2018 08:10	nan	-148.847	-65.5044	11.942	0.914849	0	33.5293	1.16033	1.62032	20.4014	1.63458	408.782	325.211	12.68	0	11.4643	2583.26	15.9015	16.6745	1	nan	nan
02/04/2018 08:20	nan	-148.775	-65.5194	12.018	0.433564	0	33.5167	1.16797	1.66312	20.3918	1.66741	408.84	325.305	13.25	0	11.9796	2576.47	17.2996	18.2313	1	nan	nan
02/04/2018 08:30	6.18541	-148.705	-65.5346	12.149	-2.69156	0	33.5164	1.15421	1.67553	20.3829	1.68703	408.78	325.27	13.05	0	11.7988	2574.5	16.8163	17.6919	1	24.9638	26.2635
02/04/2018 08:40	6.0684	-148.633	-65.55	11.959	-0.193441	0	33.5188	1.15117	1.66954	20.3754	1.68218	408.749	325.237	12.99	0	11.7445	2575.45	16.6676	17.5263	1	24.275	25.5256
02/04/2018 08:50	5.83418	-148.563	-65.5654	11.847	1.31432	0	33.5194	1.15013	1.66373	20.3662	1.67761	408.931	325.378	12.96	0	11.7174	2576.37	16.5921	17.4423	1	23.2323	24.4228
02/04/2018 09:00	nan	-148.492	-65.5806	11.751	0.599146	0	33.519	1.14286	1.67231	20.3565	1.68549	408.7	325.2	12.96	0	11.7174	2575.01	16.5965	17.4469	1	nan	nan
02/04/2018 09:10	nan	-148.422	-65.5956	11.758	-0.303496	0	33.5213	1.14857	1.66234	20.3475	1.67836	408.615	325.122	13.39	0	12.1062	2576.59	17.6461	18.6182	1	nan	nan
02/04/2018 09:20	nan	-148.351	-65.6105	11.88	1.70615	0	33.5197	1.15742	1.67071	20.3374	1.67705	408.294	324.87	13.6	0	12.296	2575.27	18.1777	19.2117	1	nan	nan
02/04/2018 09:30	nan	-148.28	-65.6254	11.858	1.34608	0	33.5188	1.15509	1.68896	20.3274	1.70423	407.381	324.162	13.93	0	12.5944	2572.38	19.0321	20.1667	1	nan	nan
02/04/2018 09:40	2.02216	-148.21	-65.6406	11.903	-1.13545	0	33.5187	1.16436	1.67931	20.3177	1.69611	407.521	324.269	13.97	0	12.6306	2573.91	19.13	20.2766	1	9.28414	9.84061
02/04/2018 09:50	nan	-148.14	-65.6557	11.632	0.0117216	0	33.5162	1.16464	1.69442	20.3073	1.70142	407.508	324.267	14.07	0	12.721	2571.51	19.3992	20.5775	1	nan	nan
02/04/2018 10:00	nan	-148.07	-65.6708	11.992	0.550956	0	33.5166	1.19351	1.68475	20.2962	1.7011	406.848	323.741	14.19	0	12.8295	2573.04	19.7081	20.9238	1	nan	nan
02/04/2018 10:10	nan	-147.999	-65.6857	11.733	-0.378847	0	33.5171	1.19784	1.71731	20.286	1.71903	406.521	323.491	14.1	0	12.7481	2567.9	19.4914	20.6799	1	nan	nan
02/04/2018 10:20	nan	-147.928	-65.7002	11.938	0.871817	0	33.5157	1.20115	1.74385	20.2774	1.75519	406.234	323.288	14.08	0	12.73	2563.71	19.4549	20.6381	1	nan	nan
02/04/2018 10:30	1.91147	-147.856	-65.7145	11.873	-1.54952	0	33.5107	1.19292	1.7327	20.2691	1.74678	406.243	323.301	14.17	0	12.8114	2565.47	19.6845	20.8956	1	9.0303	9.58592
02/04/2018 10:40	0.836227	-147.784	-65.7288	11.836	-1.79005	0	33.5089	1.17477	1.72814	20.2594	1.75111	406.171	323.25	14.25	0	12.8837	2566.19	19.8929	21.1293	1	3.99239	4.24053
02/04/2018 10:50	nan	-147.712	-65.7432	11.821	-0.37113	0	33.502	1.15969	1.6906	20.251	1.71109	407.385	324.207	14.36	0	12.9832	2572.12	20.1617	21.432	1	nan	nan
02/04/2018 11:00	nan	-147.641	-65.7582	11.728	-1.01195	0	33.502	1.15277	1.68851	20.242	1.69593	407.394	324.205	14.13	0	12.7752	2572.45	19.5527	20.7496	1	nan	nan
02/04/2018 11:10	nan	-147.57	-65.7734	11.774	-1.14691	0	33.5021	1.13961	1.69449	20.2333	1.71458	406.909	323.83	14.13	0	12.7752	2571.5	19.5563	20.7534	1	nan	nan
02/04/2018 11:20	nan	-147.499	-65.7884	11.85	-0.108704	0	33.4997	1.13624	1.66617	20.2245	1.68389	407.299	324.127	13.92	0	12.5854	2575.99	18.9929	20.1236	1	nan	nan
02/04/2018 11:30	0.068942	-147.429	-65.8037	11.817	-0.674844	0	33.4995	1.11589	1.66572	20.2167	1.6759	407.187	324.033	14.29	0	12.9199	2576.06	19.9605	21.2073	1	0.330268	0.350898
02/04/2018 11:40	1.32979	-147.358	-65.8196	12.056	-0.928389	0	33.4959	1.11765	1.64549	20.209	1.66654	407.111	323.975	13.9	0	12.5673	2579.26	18.9292	20.0531	1	6.04123	6.39991
02/04/2018 11:50	nan	-147.288	-65.8348	11.647	-0.472993	0	33.4952	1.10189	1.63977	20.2013	1.65635	406.863	323.773	14	0	12.6577	2580.17	19.1845	20.339	1	nan	nan
02/04/2018 12:00	nan	-147.217	-65.85	11.702	-0.415107	0	33.4936	1.08397	1.6362	20.1934	1.65286	407.561	324.33	14.09	0	12.7391	2580.74	19.4167	20.5991	1	nan	nan
02/04/2018 12:10	nan	-147.147	-65.8654	11.757	0.747388	0	33.4883	1.07645	1.60681	20.186	1.62607	407.979	324.658	14.38	0	13.0013	2585.41	20.163	21.4364	1	nan	nan
02/04/2018 12:20	nan	-147.077	-65.8808	11.816	-1.37974	0	33.4866	1.07005	1.60171	20.1785	1.61453	407.642	324.386	13.83	0	12.504	2586.22	18.7239	19.8249	1	nan	nan
02/04/2018 12:30	nan	-147.006	-65.8965	11.736	0.474358	0	33.4825	1.06408	1.60204	20.1716	1.61572	407.463	324.254	13.81	0	12.4859	2586.17	18.6729	19.7678	1	nan	nan
02/04/2018 12:40	nan	-146.937	-65.9123	11.857	-1.6038	0	33.481	1.05206	1.59703	20.1654	1.6077	407.615	324.373	13.76	0	12.4407	2586.97	18.5423	19.6219	1	nan	nan
02/04/2018 12:50	2.10345	-146.866	-65.9278	11.683	-0.376203	0	33.4772	1.05927	1.58434	20.1597	1.60156	407.873	324.583	13.33	0	12.0519	2588.99	17.4551	18.4075	1	8.81181	9.2926
02/04/2018 13:00	4.09882	-146.795	-65.9425	11.854	-0.478811	0	33.4807	1.05317	1.58507	20.153	1.59773	407.631	324.381	14.24	0	12.8747	2588.87	19.7792	21.007	1	19.4571	20.6649
02/04/2018 13:10	nan	-146.724	-65.9578	11.783	-1.64625	0	33.4806	1.04624	1.58434	20.1467	1.59812	407.565	324.328	13.98	0	12.6396	2588.99	19.1001	20.2464	1	nan	nan
02/04/2018 13:20	nan	-146.653	-65.9732	12	-0.634725	0	33.4772	1.03121	1.58013	20.1414	1.59295	407.856	324.565	13.8	0	12.4769	2589.66	18.6347	19.7259	1	nan	nan
02/04/2018 13:30	4.43676	-146.582	-65.9886	11.929	-1.1336	0	33.4681	1.00121	1.5608	20.1367	1.58057	408.303	324.933	13.94	0	12.6034	2592.74	18.983	20.1162	1	20.2135	21.4201
02/04/2018 13:40	nan	-146.511	-66.0041	11.907	-2.10608	0	33.4643	0.942455	1.52954	20.1318	1.55734	408.149	324.804	13.46	0	12.1695	2597.74	17.7482	18.7366	1	nan	nan
02/04/2018 13:50	3.32037	-146.44	-66.0196	12.013	0.259749	0	33.4587	0.897453	1.45675	20.103	1.48805	409.121	325.548	13.71	0	12.3955	2609.41	18.3356	19.3956	1	14.6114	15.4561
02/04/2018 14:00	nan	-146.369	-66.0349	11.883	-0.752154	0	33.4589	0.831773	1.42535	20.0321	1.44544	408.782	325.251	13.65	0	12.3413	2614.46	18.1665	19.2076	1	nan	nan
02/04/2018 14:10	1.89442	-146.297	-66.0501	12.021	-1.37908	0	33.4519	0.80584	1.41128	19.94	1.42804	409.399	325.746	13.7	0	12.3865	2616.73	18.2847	19.3402	1	8.31332	8.7932
02/04/2018 14:20	nan	-146.225	-66.0659	11.988	-1.3377	0	33.4625	0.766045	1.43823	19.8368	1.44182	409.215	325.585	13.17	0	11.9073	2612.39	16.9849	17.8876	1	nan	nan
02/04/2018 14:30	5.48155	-146.153	-66.0815	11.85	-1.36827	0	33.4641	0.722498	1.43636	19.7326	1.45177	407.899	324.541	13.55	0	12.2508	2612.69	17.9217	18.9336	1	23.5773	24.9085
02/04/2018 14:40	nan	-146.082	-66.0973	11.698	-1.42643	0	33.4621	0.675337	1.42813	19.628	1.44642	408.024	324.641	14.03	0	12.6848	2614.01	19.1374	20.2937	1	nan	nan
02/04/2018 14:50	2.34662	-146.01	-66.1128	12.002	-0.529095	0	33.4283	0.651642	1.36942	19.5294	1.40074	410.186	326.409	13.35	0	12.07	2623.49	17.3891	18.341	1	9.79333	10.3294
02/04/2018 15:00	3.3292	-145.938	-66.1281	11.907	-0.153424	0	33.429	0.666153	1.35935	19.4377	1.36632	411.839	327.701	13.53	0	12.2328	2625.12	17.8294	18.833	1	14.2458	15.0477
02/04/2018 15:10	nan	-145.867	-66.1436	12.038	0.59447	0	33.4218	0.643287	1.38599	19.3502	1.3888	410.868	326.958	13.81	0	12.4859	2620.81	18.5491	19.6367	1	nan	nan
02/04/2018 15:20	3.99211	-145.796	-66.159	11.665	1.01196	0	33.401	0.634228	1.36694	19.2666	1.39608	412.28	328.133	13.47	0	12.1785	2623.89	17.6843	18.6707	1	16.9435	17.8885
02/04/2018 15:30	0.230361	-145.721	-66.1697	11.86	-0.985556	0	33.4045	0.672558	1.35433	19.2206	1.36686	412.396	328.2	14.73	0	13.3177	2625.93	20.941	22.3184	1	1.15776	1.23391
02/04/2018 15:40	nan	-145.646	-66.1798	11.91	-1.15711	0	33.4191	0.738502	1.36007	19.2216	1.36821	411.859	327.74	15.76	5	14.2489	2625	23.8176	25.5533	1	nan	nan
02/04/2018 15:50	1.33554	-145.572	-66.1936	11.789	-0.391464	0	33.4255	0.777867	0.457462	19.2406	1.38858	410.949	327.015	14.95	5	13.5166	2775.69	20.9499	22.3612	1	6.71509	7.16745
02/04/2018 16:00	0.858293	-145.499	-66.2079	11.979	0.552687	0	33.4013	0.786841	0.0464525	19.2674	1.38975	411.45	327.468	14.28	5	12.9108	2847.46	18.9602	20.1431	1	3.90563	4.14929
02/04/2018 16:10	nan	-145.426	-66.2215	11.711	0.107863	0	33.3907	0.818172	0.0412567	19.2943	1.29529	413.257	328.871	14.29	5	12.9199	2848.38	18.9824	20.1681	1	nan	nan
02/04/2018 16:20	2.33958	-145.353	-66.2349	11.712	-0.710792	0	33.3934	0.809248	0.990487	19.3143	1.26619	413.027	328.664	14.57	5	13.173	2685.58	20.2823	21.5923	1	11.3885	12.1241
02/04/2018 16:30	1.2421	-145.28	-66.2489	11.675	-0.247608	0	33.4098	0.782703	1.23608	19.2986	1.27071	412.332	328.077	14.35	5	12.9741	2645.15	19.8552	21.1046	1	5.9189	6.29135
02/04/2018 16:40	3.31158	-145.208	-66.263	11.949	0.0426821	0	33.4072	0.792635	1.24238	19.2507	1.25593	411.639	327.522	14.14	5	12.7843	2644.12	19.3118	20.4954	1	15.3486	16.2893
02/04/2018 16:50	2.20365	-145.137	-66.2775	11.866	-0.382242	0	33.4007	0.791778	1.3115	19.1779	1.29582	411.925	327.789	14.33	5	12.9561	2632.87	19.8489	21.0948	1	10.4976	11.1566
02/04/2018 17:00	nan	-145.067	-66.2931	11.765	0.124396	0	33.4002	0.777058	1.35493	19.095	1.36359	411.998	327.891	14.43	5	13.0465	2625.83	20.1394	21.4189	1	nan	nan
02/04/2018 17:10	nan	-144.996	-66.3099	11.966	0.458474	0	33.4	0.766062	1.32034	19.0037	1.38353	411.993	327.9	13.91	5	12.5763	2631.44	18.7661	19.8818	1	nan	nan
02/04/2018 17:20	3.22243	-144.926	-66.3269	11.877	0.126795	0	33.4016	0.75437	0.6372	18.8989	1.37152	411.941	327.847	13.85	5	12.5221	2744.94	18.2243	19.2989	1	14.0944	14.9254
02/04/2018 17:30	3.92621	-144.855	-66.3441	12.258	0.991412	0	33.3973	0.741487	0	18.7904	1.39588	412.417	328.25	13.63	5	12.3232	2855.7	17.3341	18.3246	1	16.3338	17.2671
02/04/2018 17:40	nan	-144.785	-66.3614	12.074	-0.994033	0	33.3954	0.69573	0	18.6927	1.40949	412.259	328.137	13.73	5	12.4136	2855.7	17.5755	18.5945	1	nan	nan
02/04/2018 17:50	5.86084	-144.715	-66.3784	12.086	0.419567	0	33.3618	0.658997	0	18.6501	1.39712	413.034	328.823	13.64	5	12.3322	2855.7	17.3582	18.3515	1	24.4161	25.8132
02/04/2018 18:00	2.09482	-144.644	-66.3956	12.155	0.199245	0	33.3098	0.713175	0	18.6499	1.26072	415.532	330.843	13.37	5	12.0881	2855.7	16.7143	17.6322	1	8.40326	8.8647
02/04/2018 18:10	nan	-144.573	-66.4127	11.899	0.685224	0	33.3272	0.750248	0	18.6687	1.26315	415.411	330.709	13.29	5	12.0158	2855.7	16.5259	17.4218	1	nan	nan
02/04/2018 18:20	0.0434732	-144.502	-66.4296	11.642	-0.729768	0	33.3086	0.832155	0	18.6957	1.29167	415.197	330.599	13.73	5	12.4136	2855.7	17.5755	18.5945	1	0.183375	0.194007
02/04/2018 18:30	3.5362	-144.433	-66.446	11.633	-0.397768	0	33.3017	0.860472	0	18.7256	1.32636	414.387	329.991	13.94	5	12.6034	2855.7	18.0879	19.1676	1	15.3509	16.2673
02/04/2018 18:40	nan	-144.363	-66.4624	11.813	-0.963253	0	33.2992	0.872103	0	18.7556	1.38157	414.003	329.726	13.82	5	12.495	2855.7	17.7942	18.839	1	nan	nan
02/04/2018 18:50	nan	-144.293	-66.479	11.821	-0.960194	0	33.2972	0.859311	0	18.7748	1.36967	414.195	329.875	13.07	5	11.8169	2855.7	16.0131	16.8498	1	nan	nan
02/04/2018 19:00	nan	-144.222	-66.4957	11.704	0.972016	0	nan	nan	nan	nan	1.36922	414.206	nan	13.18	5	11.9163	nan	nan	nan	1	nan	nan
02/04/2018 19:10	nan	-144.151	-66.5114	11.872	1.35704	0	nan	nan	nan	nan	1.52275	412.242	nan	13.2	5	11.9344	nan	nan	nan	1	nan	nan
02/04/2018 19:20	nan	-144.078	-66.5258	11.679	2.12235	0	nan	nan	nan	nan	1.59418	411.963	nan	13.59	5	12.287	nan	nan	nan	1	nan	nan
02/04/2018 19:30	3.28012	-144.006	-66.5395	11.55	-0.0502168	0	nan	nan	nan	nan	1.59842	412.275	nan	13.99	5	12.6487	nan	nan	nan	1	nan	nan
02/04/2018 19:40	0.116958	-143.934	-66.5553	11.898	-0.0850043	0	nan	nan	nan	nan	1.62053	412.18	nan	12.7	5	11.4823	nan	nan	nan	1	nan	nan
02/04/2018 19:50	nan	-143.862	-66.5717	11.617	1.14277	0	nan	nan	nan	nan	1.62118	412.297	nan	12.87	5	11.636	nan	nan	nan	1	nan	nan
02/04/2018 20:00	nan	-143.791	-66.5876	11.546	0.677256	0	nan	nan	nan	nan	1.56154	412.679	nan	10.83	5	9.79163	nan	nan	nan	1	nan	nan
02/04/2018 20:10	nan	-143.721	-66.603	11.638	1.22582	0	nan	nan	nan	nan	1.55133	412.533	nan	12.5	5	11.3015	nan	nan	nan	1	nan	nan
02/04/2018 20:20	nan	-143.65	-66.6185	11.697	-0.723293	0	nan	nan	nan	nan	1.63192	412.711	nan	11.6	5	10.4878	nan	nan	nan	1	nan	nan
02/04/2018 20:30	nan	-143.579	-66.6333	11.768	1.47978	0	nan	nan	nan	nan	1.62841	412.971	nan	10.88	5	9.83684	nan	nan	nan	1	nan	nan
02/04/2018 20:40	nan	-143.506	-66.6485	11.722	1.00019	0	nan	nan	nan	nan	1.58701	413.36	nan	10.12	5	9.14971	nan	nan	nan	1	nan	nan
02/04/2018 20:50	nan	-143.433	-66.6636	12.089	-0.178711	0	nan	nan	nan	nan	1.54018	413.766	nan	9.84	5	8.89655	nan	nan	nan	1	nan	nan
02/04/2018 21:00	nan	-143.36	-66.6787	11.392	0.677148	0	nan	nan	nan	nan	1.4873	414.565	nan	10.26	5	9.27628	nan	nan	nan	1	nan	nan
02/04/2018 21:10	nan	-143.288	-66.6937	11.685	0.460285	0	nan	nan	nan	nan	1.43958	415.049	nan	10.88	5	9.83684	nan	nan	nan	1	nan	nan
02/04/2018 21:20	1.52986	-143.216	-66.709	11.717	-0.247497	0	nan	nan	nan	nan	1.39876	415.354	nan	10.79	5	9.75547	nan	nan	nan	1	nan	nan
02/04/2018 21:30	nan	-143.143	-66.7245	11.935	0.252479	0	nan	nan	nan	nan	1.3875	415.085	nan	10.84	5	9.80067	nan	nan	nan	1	nan	nan
02/04/2018 21:40	nan	-143.071	-66.7403	11.67	-0.247196	0	nan	nan	nan	nan	1.3794	415.183	nan	10.73	5	9.70122	nan	nan	nan	1	nan	nan
02/04/2018 21:50	2.16356	-142.998	-66.7564	11.921	1.8283	0	nan	nan	nan	nan	1.37523	415.413	nan	10.92	5	9.873	nan	nan	nan	1	nan	nan
02/04/2018 22:00	nan	-142.925	-66.7713	11.555	-0.796039	0	nan	nan	nan	nan	1.39722	415.484	nan	10.97	5	9.91821	nan	nan	nan	1	nan	nan
02/04/2018 22:10	nan	-142.849	-66.7828	11.612	-0.384683	0	nan	nan	nan	nan	1.36693	415.654	nan	11.58	5	10.4697	nan	nan	nan	1	nan	nan
02/04/2018 22:20	nan	-142.775	-66.7972	12.096	nan	0	nan	nan	nan	nan	1.35672	415.793	nan	11.95	5	10.8042	nan	nan	nan	1	nan	nan
02/04/2018 22:30	nan	-142.703	-66.814	12.143	nan	0	33.2623	0.771495	1.37012	18.1107	1.37014	415.416	330.927	8.18	0	7.39571	2623.37	6.98488	6.88613	1	nan	nan
02/04/2018 22:40	nan	-142.63	-66.8307	12.282	nan	0	33.2696	0.840113	1.4219	18.1275	1.40986	414.989	330.595	6.64	0	6.00336	2615.02	4.79007	4.54462	1	nan	nan
02/04/2018 22:50	nan	-142.557	-66.8474	12.2	nan	0	33.271	0.903385	1.46908	18.173	1.4746	414.494	330.238	6.1	0	5.51514	2607.43	4.12017	3.84107	1	nan	nan
02/04/2018 23:00	nan	-142.482	-66.8629	11.966	nan	0	33.2773	0.937224	1.46408	18.2306	1.47721	414.592	330.304	4.66	0	4.2132	2608.23	2.563	2.24129	1	nan	nan
02/04/2018 23:10	nan	-142.406	-66.8763	11.779	nan	0	33.2853	0.96402	1.45123	18.2884	1.46311	414.163	329.935	5.19	0	4.69239	2610.29	3.09269	2.779	1	nan	nan
02/04/2018 23:20	nan	-142.33	-66.8897	12.014	nan	0	33.2788	0.963025	1.44718	18.3496	1.47345	414.036	329.855	5.25	0	4.74664	2610.95	3.15545	2.84327	1	nan	nan
02/04/2018 23:30	nan	-142.253	-66.9016	11.766	nan	0	33.2664	0.97299	1.39801	18.4123	1.41911	414.917	330.551	5.76	0	5.20774	2618.87	3.71191	3.41733	1	nan	nan
02/04/2018 23:40	nan	-142.175	-66.9127	11.913	nan	0	33.2745	0.991843	1.39786	18.4746	1.4033	415.14	330.7	7.5	0	6.78091	2618.89	5.96672	5.79379	1	nan	nan
02/04/2018 23:50	nan	-142.097	-66.9241	11.781	nan	0	33.2852	1.00029	1.41688	18.537	1.42138	414.418	330.112	7.67	0	6.93461	2615.82	6.21887	6.06297	1	nan	nan
03/04/2018 00:00	nan	-142.018	-66.9348	11.951	nan	0	33.2835	1.00418	1.40192	18.5983	1.40374	414.602	330.252	8.08	0	7.3053	2618.24	6.83606	6.72538	1	nan	nan
03/04/2018 00:10	nan	-141.94	-66.9476	12.175	nan	0	33.2823	1.07911	1.40531	18.6621	1.40302	414.143	329.888	8.6	0	7.77544	2617.69	7.6653	7.61968	1	nan	nan
03/04/2018 00:20	nan	-141.862	-66.9613	12.091	nan	0	33.2915	1.1069	1.47589	18.7271	1.45142	413.554	329.428	7.88	0	7.12447	2606.33	6.54484	6.41116	1	nan	nan
03/04/2018 00:30	nan	-141.785	-66.9749	12.089	nan	0	33.2867	1.13902	1.52559	18.7908	1.52574	413.187	329.193	7.84	0	7.08831	2598.37	6.49424	6.35595	1	nan	nan
03/04/2018 00:40	nan	-141.706	-66.9881	12.215	nan	0	33.2828	1.16663	1.53257	18.8543	1.53084	413.187	329.205	7.74	0	6.9979	2597.25	6.34528	6.19618	1	nan	nan
03/04/2018 00:50	nan	-141.626	-67.0011	12.058	nan	0	33.287	1.17605	1.5486	18.9167	1.54862	412.984	329.045	7.55	0	6.82611	2594.69	6.06739	5.89862	1	nan	nan
03/04/2018 01:00	nan	-141.545	-67.0118	11.994	nan	0	33.2847	1.14007	1.54728	18.9758	1.55504	413.126	329.168	8.69	0	7.85681	2594.9	7.8477	7.81408	1	nan	nan
03/04/2018 01:10	nan	-141.464	-67.0226	11.894	nan	0	33.2862	1.14864	1.47938	19.036	1.52064	413.403	329.363	8.76	0	7.9201	2605.77	7.94779	7.9239	1	nan	nan
03/04/2018 01:20	nan	-141.385	-67.034	11.994	nan	0	33.2881	1.12762	1.48251	19.0935	1.4801	413.624	329.509	8.15	0	7.36859	2605.27	6.96211	6.85942	1	nan	nan
03/04/2018 01:30	nan	-141.307	-67.0457	11.739	nan	0	33.2846	0.976968	1.48279	19.1469	1.5219	413.323	329.304	7.01	0	6.33789	2605.22	5.29236	5.07472	1	nan	nan
03/04/2018 01:40	nan	-141.228	-67.0567	12.353	nan	0	33.2663	0.949955	1.25024	19.2	1.35411	415.618	331.069	6.51	0	5.88583	2642.84	4.59833	4.34536	1	nan	nan
03/04/2018 01:50	nan	-141.148	-67.0673	11.776	nan	0	33.2709	1.02181	1.17928	19.2435	1.17323	417.092	332.119	8.44	0	7.63078	2654.44	7.35392	7.28782	1	nan	nan
03/04/2018 02:00	nan	-141.068	-67.0776	11.928	nan	0	33.2883	1.08631	1.36382	19.2841	1.34076	414.597	330.198	8.1	0	7.32338	2624.39	6.859	6.75079	1	nan	nan
03/04/2018 02:10	nan	-140.987	-67.0859	11.706	nan	0	33.2901	1.06378	1.43491	19.3205	1.43555	413.767	329.592	8.58	0	7.75736	2612.92	7.63953	7.5912	1	nan	nan
03/04/2018 02:20	nan	-140.906	-67.0928	11.595	nan	0	33.2793	0.982882	1.43749	19.3562	1.45509	413.834	329.682	9.19	0	8.30887	2612.51	8.67084	8.70966	1	nan	nan
03/04/2018 02:30	nan	-140.824	-67.0991	11.648	nan	0	33.2212	0.940388	1.31752	19.3923	1.37915	415.621	331.189	8.75	0	7.91106	2631.9	7.89164	7.86648	1	nan	nan
03/04/2018 02:40	nan	-140.742	-67.103	11.656	nan	0	33.196	0.927993	1.24994	19.4223	1.28363	417.009	332.293	9.09	0	8.21846	2642.89	8.44845	8.47202	1	nan	nan
03/04/2018 02:50	nan	-140.66	-67.1059	11.643	nan	0	33.1927	0.965582	1.23621	19.4525	1.24867	417.473	332.648	9.46	0	8.55299	2645.13	9.09113	9.17187	1	nan	nan
03/04/2018 03:00	nan	-140.579	-67.1109	11.592	nan	0	33.2511	1.00675	1.34214	19.4856	1.32202	415.583	331.056	9.38	0	8.48066	2627.9	8.97868	9.0469	1	nan	nan
03/04/2018 03:10	nan	-140.498	-67.1187	11.737	nan	0	33.2618	1.02574	1.39495	19.5195	1.40567	414.244	330.017	7.43	0	6.71762	2619.36	5.86533	5.68563	1	nan	nan
03/04/2018 03:20	nan	-140.418	-67.1276	11.9	nan	0	33.2611	1.03301	1.41522	19.5501	1.42541	414.097	329.914	6.51	0	5.88583	2616.09	4.62178	4.36751	1	nan	nan
03/04/2018 03:30	nan	-140.338	-67.1385	11.965	nan	0	33.2608	1.05768	1.41346	19.5779	1.43271	413.998	329.84	5.22	0	4.71951	2616.38	3.12055	2.80795	1	nan	nan
03/04/2018 03:40	nan	-140.258	-67.1492	11.871	nan	0	33.2579	1.03651	1.4061	19.6067	1.4265	414.032	329.87	4.7	0	4.24937	2617.56	2.59672	2.27586	1	nan	nan
03/04/2018 03:50	nan	-140.176	-67.1573	11.862	nan	0	33.2557	1.02603	1.39013	19.6329	1.41492	414.285	330.069	4.98	0	4.50252	2620.14	2.87115	2.55385	1	nan	nan
03/04/2018 04:00	nan	-140.093	-67.1644	11.908	nan	0	33.2531	0.987522	1.44365	19.6596	1.44342	414.525	330.284	5.25	0	4.74664	2611.51	3.15511	2.84296	1	nan	nan
03/04/2018 04:10	nan	-140.012	-67.174	12.151	nan	0	33.2524	0.997168	1.42076	19.6849	1.45352	415.046	330.706	9.05	0	8.1823	2615.2	8.42422	8.44197	1	nan	nan
03/04/2018 04:20	nan	-139.93	-67.1842	12.264	nan	0	33.2538	0.989325	1.42526	19.7113	1.43671	415.347	330.933	8.01	0	7.24201	2614.47	6.73297	6.61411	1	nan	nan
03/04/2018 04:30	nan	-139.847	-67.1941	12.251	nan	0	33.2553	0.970603	1.45738	19.7365	1.47701	414.964	330.649	7.92	0	7.16064	2609.31	6.60188	6.47272	1	nan	nan
03/04/2018 04:40	nan	-139.765	-67.2037	12.099	nan	0	33.2478	0.98096	1.43206	19.7615	1.45856	414.956	330.649	8.22	0	7.43188	2613.38	7.06104	6.96693	1	nan	nan
03/04/2018 04:50	nan	-139.682	-67.2132	11.952	nan	0	33.2432	0.999408	1.4231	19.7823	1.45088	415.172	330.826	7.47	0	6.75378	2614.82	5.92799	5.752	1	nan	nan
03/04/2018 05:00	nan	-139.599	-67.2227	12.136	nan	0	33.2422	0.997883	1.41865	19.8059	1.44425	415.426	331.027	7.4	0	6.6905	2615.54	5.82662	5.64393	1	nan	nan
03/04/2018 05:10	nan	-139.516	-67.2299	11.757	nan	0	33.2466	1.00901	1.41557	19.8261	1.44224	415.431	331.02	7.26	0	6.56392	2616.04	5.62751	5.43188	1	nan	nan
03/04/2018 05:20	nan	-139.432	-67.2351	11.85	nan	0	33.2564	0.972535	1.41498	19.8485	1.4412	415.02	330.669	7.69	0	6.95269	2616.13	6.24808	6.09427	1	nan	nan
03/04/2018 05:30	nan	-139.349	-67.2402	11.853	nan	0	33.2484	0.92786	1.40849	19.8628	1.44826	414.942	330.629	7.54	0	6.81707	2617.18	6.02671	5.85767	1	nan	nan
03/04/2018 05:40	nan	-139.265	-67.2454	12.071	nan	0	33.2117	0.919152	1.35156	19.8787	1.39554	416.37	331.818	7.41	0	6.69954	2626.38	5.82887	5.64751	1	nan	nan
03/04/2018 05:50	nan	-139.181	-67.2504	12.144	nan	0	33.2107	0.889703	1.33426	19.8942	1.36234	417.096	332.378	7.75	0	7.00694	2629.18	6.3215	6.17436	1	nan	nan
03/04/2018 06:00	nan	-139.098	-67.2568	12.128	nan	0	33.1836	0.895851	1.31648	19.9109	1.35343	417.468	332.73	8.36	0	7.55845	2632.07	7.25717	7.18064	1	nan	nan
03/04/2018 06:10	nan	-139.015	-67.2644	11.968	nan	0	33.1732	0.90912	1.32479	19.9279	1.34795	417.59	332.848	7.78	0	7.03406	2630.72	6.36434	6.22044	1	nan	nan
03/04/2018 06:20	nan	-138.932	-67.2722	11.986	nan	0	33.1656	0.905098	1.34996	19.94	1.37386	417.205	332.574	7.96	0	7.1968	2626.64	6.64091	6.51666	1	nan	nan
03/04/2018 06:30	nan	-138.849	-67.2798	11.723	nan	0	33.1639	0.903372	1.35198	19.9574	1.38123	417.232	332.605	7.82	0	7.07023	2626.31	6.42956	6.28984	1	nan	nan
03/04/2018 06:40	nan	-138.766	-67.2874	11.914	nan	0	33.1685	0.909472	1.35319	19.97	1.38779	417.314	332.663	7.84	0	7.08831	2626.12	6.45984	6.32229	1	nan	nan
03/04/2018 06:50	nan	-138.684	-67.2956	12.122	nan	0	33.1671	0.933637	1.37161	19.9877	1.39593	417.127	332.523	6.33	0	5.72309	2623.13	4.38906	4.12379	1	nan	nan
03/04/2018 07:00	nan	-138.601	-67.3032	12.101	nan	0	33.1823	0.984998	1.38218	20.0006	1.40437	417.09	332.464	6.92	0	6.25652	2621.42	5.15418	4.92995	1	nan	nan
03/04/2018 07:10	3.95935	-138.518	-67.3103	12.069	1.20547	0	33.2025	0.968152	1.4406	20.0155	1.46071	416.188	331.734	6.64	0	6.00336	2612.01	4.79283	4.54724	1	4.55436	4.32099
03/04/2018 07:20	7.5533	-138.434	-67.3176	12.136	2.26157	0	33.2032	0.972695	1.42769	20.0268	1.46372	415.988	331.575	5.88	0	5.31623	2614.08	3.85405	3.56446	1	6.98659	6.46162
03/04/2018 07:30	7.02464	-138.35	-67.325	11.878	2.28773	0	33.1735	0.99633	1.42574	20.0404	1.44746	416.678	332.183	5.25	0	4.74664	2614.4	3.15337	2.8414	1	5.31631	4.79035
03/04/2018 07:40	4.04294	-138.266	-67.3326	12.156	2.76082	0	33.147	0.982752	1.45813	20.0543	1.48867	416.733	332.312	4.52	0	4.08663	2609.18	2.43047	2.10826	1	2.3583	2.04565
03/04/2018 07:50	2.90251	-138.183	-67.3402	12.199	3.00914	0	33.1434	0.99755	1.42606	20.0666	1.46501	416.751	332.32	4.31	0	3.89676	2614.35	2.23658	1.91501	1	1.55801	1.334
03/04/2018 08:00	5.25264	-138.099	-67.3477	12.179	1.9792	0	33.1485	0.98732	1.45232	20.0787	1.47384	416.687	332.263	4.67	0	4.22225	2610.12	2.57163	2.2501	1	3.24188	2.83656
03/04/2018 08:10	1.2218	-138.015	-67.3555	11.974	3.23457	0	33.1453	0.928268	1.43218	20.0907	1.48788	416.546	332.167	4.96	0	4.48444	2613.36	2.8547	2.53666	1	0.83709	0.743831
03/04/2018 08:20	6.91959	-137.932	-67.3638	11.996	2.80479	0	33.1473	0.910942	1.20458	20.0995	1.30256	417.32	332.663	4.93	0	4.45732	2650.3	2.80482	2.48854	1	4.65798	4.13273
03/04/2018 08:30	3.03812	-137.849	-67.3721	12.214	3.20242	0	33.143	0.917255	1.17826	20.1092	1.2135	417.148	332.48	4.56	0	4.12279	2654.61	2.44665	2.1273	1	1.78397	1.55112
03/04/2018 08:40	1.3572	-137.765	-67.3797	11.893	3.01224	0	33.1505	0.913392	1.17911	20.1206	1.2137	417.009	332.353	4.91	0	4.43923	2654.47	2.78278	2.46645	1	0.906431	0.803396
03/04/2018 08:50	0.265989	-137.682	-67.388	11.986	2.46897	0	33.1589	0.902627	1.18691	20.13	1.22385	416.871	332.23	5.05	0	4.56581	2653.19	2.92382	2.60974	1	0.186649	0.166599
03/04/2018 09:00	3.61842	-137.599	-67.3936	11.758	2.09349	0	33.1607	0.893146	1.18599	20.1358	1.22441	416.83	332.193	4.17	0	3.77018	2653.34	2.09759	1.7794	1	1.82159	1.54527
03/04/2018 09:10	3.71469	-137.514	-67.4002	11.885	3.54794	0	33.1473	0.896253	1.15214	20.1417	1.19667	417.477	332.722	4.51	0	4.07759	2658.89	2.39843	2.07923	1	2.13826	1.85368
03/04/2018 09:20	8.55775	-137.43	-67.4096	12.221	4.10058	0	33.1415	0.896718	1.15902	20.1456	1.19559	417.471	332.73	4.46	0	4.03238	2657.76	2.35312	2.03381	1	4.83298	4.17716
03/04/2018 09:30	nan	-137.345	-67.4186	12.401	2.44624	0	33.1325	0.92052	1.16629	20.1549	1.1984	417.458	332.742	4.55	0	4.11375	2656.57	2.43646	2.1172	1	nan	nan
03/04/2018 09:40	0.440134	-137.259	-67.427	12.357	2.89471	0	33.124	0.937585	1.19659	20.1607	1.22308	417.214	332.582	4.72	0	4.26745	2651.61	2.59912	2.28049	1	0.274551	0.240893
03/04/2018 09:50	nan	-137.173	-67.4351	12.419	2.10146	0	33.1246	0.936398	1.21072	20.1684	1.24304	417.038	332.453	5.02	0	4.53869	2649.29	2.89559	2.58072	1	nan	nan
03/04/2018 10:00	4.40431	-137.087	-67.4431	12.342	2.32781	0	33.1285	0.919527	1.20619	20.1799	1.24596	417.228	332.597	5.04	0	4.55677	2650.04	2.91542	2.60096	1	3.0817	2.74931
03/04/2018 10:10	2.28271	-137.001	-67.4512	12.321	2.88093	0	33.1268	0.918712	1.18493	20.1877	1.22868	417.385	332.715	4.93	0	4.45732	2653.52	2.80312	2.48704	1	1.53569	1.36252
03/04/2018 10:20	2.76075	-136.915	-67.4594	12.427	2.35138	0	33.1229	0.910815	1.17423	20.1957	1.21031	417.577	332.867	4.77	0	4.31266	2655.27	2.64542	2.32746	1	1.7528	1.54213
03/04/2018 10:30	1.69816	-136.829	-67.4677	12.32	4.05769	0	33.1244	0.911247	1.17248	20.2051	1.21434	417.532	332.83	4.65	0	4.20416	2655.56	2.53059	2.2117	1	1.03137	0.9014
03/04/2018 10:40	3.73934	-136.744	-67.4755	12.342	3.51858	0	33.1252	0.919797	1.16988	20.2142	1.20806	417.606	332.883	4.71	0	4.25841	2655.98	2.58742	2.26897	1	2.32206	2.03627
03/04/2018 10:50	3.50729	-136.658	-67.4828	12.074	3.67444	0	33.1351	0.938035	1.18617	20.2198	1.21209	417.517	332.792	4.84	0	4.37595	2653.31	2.71446	2.39715	1	2.2849	2.0178
03/04/2018 11:00	nan	-136.573	-67.4907	12.194	3.93002	0	33.1361	0.9366	1.20107	20.232	1.23352	417.318	332.644	4.73	0	4.27649	2650.87	2.60907	2.29048	1	nan	nan
03/04/2018 11:10	0.567547	-136.489	-67.4998	12.266	4.57823	0	33.1371	0.934643	1.21389	20.2379	1.25035	417.172	332.536	4.61	0	4.168	2648.78	2.49611	2.1766	1	0.339998	0.296477
03/04/2018 11:20	nan	-136.404	-67.5092	12.359	3.40924	0	33.1393	0.932157	1.20478	20.2458	1.24018	417.274	332.606	3.79	0	3.42662	2650.27	1.78319	1.47073	1	nan	nan
03/04/2018 11:30	7.45199	-136.317	-67.5167	12.429	3.95018	0	33.1386	0.934748	1.20156	20.2556	1.24181	417.251	332.59	5.88	0	5.31623	2650.79	3.82727	3.53969	1	6.84499	6.33066
03/04/2018 11:40	4.27992	-136.231	-67.5241	12.563	2.9303	0	33.1374	0.923158	1.19473	20.2619	1.23689	417.397	332.706	6.29	0	5.68692	2651.91	4.31588	4.04968	1	4.43319	4.15975
03/04/2018 11:50	nan	-136.143	-67.5318	12.437	1.92096	0	33.1402	0.923143	1.18969	20.271	1.22747	417.389	332.687	7.2	0	6.50967	2652.73	5.50498	5.30539	1	nan	nan
03/04/2018 12:00	5.15618	-136.055	-67.5395	12.546	2.70735	0	33.1321	0.92658	1.1832	20.2789	1.22226	417.415	332.724	7.18	0	6.49159	2653.8	5.47619	5.2749	1	6.7767	6.52759
03/04/2018 12:10	6.56657	-135.966	-67.5473	12.57	2.56958	0	33.1287	0.93348	1.18187	20.2867	1.22169	417.103	332.482	7.21	0	6.51871	2654.02	5.51751	5.31885	1	8.69547	8.38238
03/04/2018 12:20	3.74996	-135.877	-67.5552	12.736	1.70569	0	33.1259	0.933072	1.19189	20.3008	1.22424	416.883	332.315	7.43	0	6.71762	2652.38	5.82871	5.65014	1	5.24578	5.08507
03/04/2018 12:30	5.47671	-135.788	-67.5633	12.741	2.39608	0	33.1114	0.930385	1.18894	20.306	1.22277	416.547	332.079	7.2	0	6.50967	2652.86	5.50485	5.30526	1	7.23563	6.97329
03/04/2018 12:40	0.805435	-135.699	-67.5713	12.861	3.90423	0	33.1117	0.921453	1.19851	20.3152	1.23466	416.232	331.835	7.14	0	6.45542	2651.29	5.42361	5.21875	1	1.04841	1.00881
03/04/2018 12:50	nan	-135.61	-67.5795	12.755	2.78552	0	33.106	0.93844	1.17557	20.3272	1.22	416.739	332.243	8.15	0	7.36859	2655.05	6.89654	6.79482	1	nan	nan
03/04/2018 13:00	3.86095	-135.521	-67.5878	12.862	3.14347	0	33.1099	0.947931	1.18222	20.339	1.21122	416.916	332.37	8.06	0	7.28722	2653.96	6.75919	6.64694	1	6.26324	6.15924
03/04/2018 13:10	nan	-135.432	-67.5957	12.649	4.05293	0	33.109	0.950622	1.19078	20.3511	1.22492	416.848	332.326	7.81	0	7.06119	2652.56	6.38275	6.24264	1	nan	nan
03/04/2018 13:20	0.941627	-135.343	-67.6035	12.6	3.33803	0	33.1081	0.982538	1.18804	20.3637	1.22429	416.901	332.37	7.93	0	7.16968	2653.01	6.56239	6.43541	1	1.48304	1.45434
03/04/2018 13:30	3.57966	-135.255	-67.6114	12.343	1.74289	0	33.1097	0.942547	1.22424	20.3788	1.24057	416.589	332.127	7.62	0	6.8894	2647.08	6.10882	5.94874	1	5.2482	5.11068
03/04/2018 13:40	nan	-135.168	-67.6199	12.556	2.11481	0	33.1121	0.938017	1.17946	20.3936	1.24052	416.941	332.403	7.58	0	6.85324	2654.41	6.0422	5.87832	1	nan	nan
03/04/2018 13:50	2.98547	-135.08	-67.6282	12.621	3.86004	0	33.1127	0.936738	1.15443	20.4039	1.18865	417.389	332.726	7.48	0	6.76283	2658.52	5.8934	5.71982	1	4.2227	4.09833
03/04/2018 14:00	nan	-134.992	-67.6362	12.305	3.04022	0	33.1125	0.941271	1.16378	20.4178	1.20205	417.301	332.664	7.66	0	6.92557	2656.98	6.15586	6.00015	1	nan	nan
03/04/2018 14:10	2.37364	-134.905	-67.6442	12.579	5.49738	0	33.1122	0.909217	1.17043	20.4276	1.19632	417.232	332.607	7.1	0	6.41926	2655.89	5.36405	5.15597	1	3.05576	2.93722
03/04/2018 14:20	5.45871	-134.819	-67.6526	12.368	2.78689	0	33.1112	0.886947	1.14627	20.4346	1.20226	417.186	332.576	7.73	0	6.98886	2659.86	6.2554	6.10701	1	8.19514	8.00074
03/04/2018 14:30	3.78964	-134.732	-67.6603	12.114	4.04821	0	33.1015	0.842067	1.10277	20.4262	1.15319	417.949	333.176	7.9	0	7.14256	2667.01	6.49998	6.37002	1	5.91182	5.79361
03/04/2018 14:40	nan	-134.645	-67.6683	12.123	4.56971	0	33.1063	0.789022	1.09761	20.3748	1.1388	418.063	333.247	8.27	0	7.47708	2667.86	7.06666	6.97956	1	nan	nan
03/04/2018 14:50	4.99128	-134.558	-67.676	12.149	3.38711	0	33.1022	0.770032	1.0935	20.3335	1.13423	417.635	332.912	7.72	0	6.97981	2668.54	6.23049	6.08131	1	7.46354	7.28483
03/04/2018 15:00	1.88519	-134.472	-67.684	12.48	2.57686	0	33.0965	0.741776	1.10646	20.3021	1.14126	417.802	333.063	7.32	0	6.61817	2666.4	5.65798	5.46963	1	2.55993	2.47471
03/04/2018 15:10	2.91979	-134.385	-67.6924	12.211	3.06785	0	33.097	0.745805	1.08916	20.2791	1.14079	417.847	333.097	6.73	0	6.08473	2669.25	4.85753	4.62098	1	3.40392	3.23815
03/04/2018 15:20	nan	-134.298	-67.7005	12.046	2.14109	0	33.0966	0.747327	1.08445	20.2634	1.12014	417.975	333.187	6.6	0	5.9672	2670.03	4.6892	4.44354	1	nan	nan
03/04/2018 15:30	1.87368	-134.21	-67.7084	12.187	2.01306	0	33.0952	0.726958	1.0948	20.248	1.13476	417.775	333.04	6.21	0	5.61459	2668.32	4.20511	3.93516	1	1.89097	1.76958
03/04/2018 15:40	4.0438	-134.123	-67.7163	12.137	3.21277	0	33.0966	0.716243	1.06279	20.2289	1.11421	418.075	333.263	5.77	0	5.21678	2673.61	3.68505	3.39392	1	3.57639	3.29384
03/04/2018 15:50	3.44411	-134.036	-67.7237	12.415	4.32501	0	33.0974	0.717797	1.05428	20.2084	1.08719	418.399	333.502	5.45	0	4.92746	2675.01	3.32988	3.02712	1	2.75243	2.50218
03/04/2018 16:00	nan	-133.949	-67.7318	12.393	2.09106	0	33.107	0.753571	1.22802	20.187	1.17243	418.238	333.406	5.15	0	4.65622	2646.47	3.03001	2.71757	1	nan	nan
03/04/2018 16:10	7.2871	-133.862	-67.7401	12.624	1.97272	0	33.0982	0.798717	1.38493	20.1763	1.38302	418.263	333.578	4.82	0	4.35786	2620.98	2.7115	2.392	1	4.74215	4.18337
03/04/2018 16:20	6.70674	-133.775	-67.7476	12.405	3.00816	0	33.0994	0.79767	1.41577	20.1673	1.43666	417.842	333.272	4.75	0	4.29458	2616	2.64576	2.32524	1	4.25867	3.74274
03/04/2018 16:30	4.33992	-133.688	-67.7555	12.473	2.9911	0	33.1038	0.780998	1.41136	20.138	1.44278	417.785	333.221	4.73	0	4.27649	2616.72	2.62605	2.30538	1	2.73524	2.40124
03/04/2018 16:40	5.49464	-133.601	-67.7636	12.267	1.3436	0	33.1197	0.757987	1.40069	20.0987	1.43637	418.357	333.637	4.73	0	4.27649	2618.44	2.62518	2.30462	1	3.46187	3.03914
03/04/2018 16:50	5.31994	-133.513	-67.7718	12.522	1.9365	0	33.118	0.726668	1.39737	20.0493	1.43227	418.301	333.594	4.93	0	4.45732	2618.97	2.82155	2.50338	1	3.60251	3.19629
03/04/2018 17:00	3.35805	-133.426	-67.7798	12.402	2.47064	0	33.1175	0.716171	1.37691	19.9887	1.41193	418.691	333.893	5.06	0	4.57485	2622.28	2.95122	2.63549	1	2.37849	2.12402
03/04/2018 17:10	1.67925	-133.338	-67.7876	12.229	2.57711	0	33.1033	0.699355	1.38529	19.9293	1.40891	418.376	333.673	5.1	0	4.61102	2620.92	2.99303	2.67801	1	1.20626	1.07929
03/04/2018 17:20	11.0736	-133.252	-67.7959	12.228	1.69336	0	33.1007	0.689208	1.38838	19.8689	1.42355	417.995	333.383	5.12	0	4.6291	2620.42	3.01395	2.69931	1	8.01009	7.17388
03/04/2018 17:30	2.54893	-133.165	-67.8036	12.331	2.07042	0	33.1143	0.675608	1.37951	19.8047	1.4064	418.475	333.725	5.14	0	4.64718	2621.86	3.03382	2.7197	1	1.85592	1.66376
03/04/2018 17:40	nan	-133.077	-67.8114	12.577	2.34336	0	33.118	0.664117	1.38111	19.7401	1.41306	418.294	333.576	5.26	0	4.75568	2621.6	3.1596	2.84831	1	nan	nan
03/04/2018 17:50	2.51555	-132.99	-67.8194	12.297	2.11927	0	33.1182	0.693297	1.36756	19.7102	1.39839	418.296	333.568	5.22	0	4.71951	2623.79	3.11614	2.80398	1	1.88131	1.69285
03/04/2018 18:00	7.65368	-132.902	-67.8273	12.307	3.15686	0	33.1179	0.730976	1.37751	19.7109	1.40812	418.326	333.598	5.24	0	4.73759	2622.18	3.13814	2.82638	1	5.76439	5.19172
03/04/2018 18:10	1.65767	-132.815	-67.8359	12.307	2.87122	0	33.1166	0.759885	1.37777	19.7226	1.4067	418.521	333.756	5.22	0	4.71951	2622.14	3.11713	2.80487	1	1.24012	1.11589
03/04/2018 18:20	10.4332	-132.727	-67.8439	12.275	1.98259	0	33.1188	0.77116	1.37922	19.7379	1.41229	418.464	333.709	5.24	0	4.73759	2621.9	3.13831	2.82653	1	7.8582	7.07752
03/04/2018 18:30	0.961777	-132.639	-67.8514	12.253	2.3358	0	33.1169	0.758583	1.36503	19.7395	1.40389	418.371	333.634	5.25	0	4.74664	2624.2	3.14748	2.83608	1	0.726521	0.654643
03/04/2018 18:40	6.43182	-132.552	-67.8601	12.433	3.36521	0	33.1076	0.738922	1.35906	19.7243	1.39288	418.794	333.986	5.23	0	4.72855	2625.16	3.12583	2.814	1	4.82515	4.34379
03/04/2018 18:50	0.99106	-132.465	-67.869	12.319	1.67542	0	33.0866	0.730917	1.35965	19.6982	1.38871	418.823	334.055	5.26	0	4.75568	2625.07	3.15751	2.84643	1	0.751028	0.677035
03/04/2018 19:00	1.23506	-132.377	-67.8763	12.139	2.96814	0	33.0803	0.715207	1.36744	19.6677	1.40108	418.771	334.035	5.24	0	4.73759	2623.81	3.13717	2.8255	1	0.9299	0.837518
03/04/2018 19:10	2.57786	-132.29	-67.8833	12.224	3.1905	0	33.0845	0.68685	1.35499	19.6368	1.39103	418.651	333.923	5.17	0	4.67431	2625.82	3.06268	2.74946	1	1.89484	1.70106
03/04/2018 19:20	nan	-132.204	-67.8914	12.181	2.06399	0	33.1011	0.661707	1.34434	19.6025	1.38509	418.947	334.118	5.19	0	4.69239	2627.55	3.08252	2.76986	1	nan	nan
03/04/2018 19:30	0.823518	-132.118	-67.9	11.884	2.74168	0	33.1054	0.67886	1.30927	19.5674	1.35015	419.174	334.267	5.2	0	4.70143	2633.24	3.08962	2.77754	1	0.610646	0.548966
03/04/2018 19:40	9.69941	-132.031	-67.9077	12.133	2.95587	0	33.0925	0.718857	1.35148	19.5571	1.36767	418.664	333.901	5.22	0	4.71951	2626.39	3.1146	2.80259	1	7.25035	6.52404
03/04/2018 19:50	6.97861	-131.944	-67.915	12.037	2.95636	0	33.0787	0.754268	1.37565	19.5652	1.39399	418.575	333.878	5.16	0	4.66526	2622.48	3.05422	2.74058	1	5.11541	4.5901
03/04/2018 20:00	3.70286	-131.857	-67.9224	12.153	3.23945	0	33.0595	0.781371	1.37893	19.5822	1.41267	418.022	333.493	5.2	0	4.70143	2621.95	3.09626	2.78351	1	2.75161	2.47367
03/04/2018 20:10	nan	-131.77	-67.9299	12.121	3.06572	0	33.0605	0.772125	1.36378	19.6029	1.39707	418.062	333.512	5.15	0	4.65622	2624.4	3.04272	2.72897	1	nan	nan
03/04/2018 20:20	9.07639	-131.684	-67.9373	12.153	1.87713	0	33.0757	0.76711	1.32991	19.6277	1.36676	418.095	333.485	5.19	0	4.69239	2629.89	3.08115	2.76863	1	6.71176	6.031
03/04/2018 20:30	4.69506	-131.598	-67.9456	12.304	1.06481	0	33.09	0.75974	1.31371	19.6472	1.35122	417.234	332.756	5.19	0	4.69239	2632.51	3.07961	2.76725	1	3.47015	3.11818
03/04/2018 20:40	4.34526	-131.512	-67.9544	12.125	1.87329	0	33.0882	0.797983	1.29651	19.6675	1.33472	417.682	333.107	5.24	0	4.73759	2635.31	3.13031	2.81933	1	3.26449	2.94017
03/04/2018 20:50	0.818997	-131.426	-67.9622	12.248	2.78687	0	33.0785	0.815637	1.32748	19.679	1.33871	417.432	332.932	5.14	0	4.64718	2630.28	3.02896	2.71534	1	0.59537	0.533725
03/04/2018 21:00	2.25317	-131.338	-67.9694	12.344	2.84363	0	33.0598	0.791147	1.39261	19.6855	1.41003	417.824	333.332	5.27	0	4.76472	2619.74	3.17131	2.86016	1	1.71492	1.54666
03/04/2018 21:10	nan	-131.25	-67.9771	12.312	3.02714	0	33.0659	0.78979	1.36787	19.6875	1.4135	417.976	333.442	5.31	0	4.80088	2623.74	3.21137	2.90153	1	nan	nan
03/04/2018 21:20	1.69256	-131.162	-67.9845	12.113	1.64837	0	33.0649	0.766917	1.36171	19.686	1.38706	417.921	333.383	5.31	0	4.80088	2624.74	3.21076	2.90098	1	1.30426	1.17842
03/04/2018 21:30	nan	-131.075	-67.9926	12.313	1.60351	0	33.0933	0.737308	1.35596	19.6788	1.39412	417.441	332.94	5.26	0	4.75568	2625.67	3.15715	2.8461	1	nan	nan
03/04/2018 21:40	2.49284	-130.988	-68.0011	12.053	2.83215	0	33.1252	0.710272	1.33293	19.6667	1.37082	415.663	331.436	5.29	0	4.7828	2629.4	3.18666	2.87662	1	1.90652	1.72103
03/04/2018 21:50	6.06173	-130.902	-68.0096	12.085	3.16723	0	33.1278	0.685073	1.32053	19.6369	1.35827	415.405	331.216	5.33	0	4.81897	2631.41	3.22801	2.91917	1	4.69615	4.24685
03/04/2018 22:00	3.67607	-130.815	-68.0173	12.175	2.11549	0	33.124	0.657605	1.31799	19.5932	1.34936	415.616	331.387	5.27	0	4.76472	2631.82	3.16402	2.85359	1	2.79148	2.5176
03/04/2018 22:10	nan	-130.728	-68.025	12.194	2.17575	0	33.1222	0.638292	1.30215	19.5486	1.33987	416.036	331.72	5.34	0	4.82801	2634.39	3.23685	2.92847	1	nan	nan
03/04/2018 22:20	nan	-130.641	-68.0327	12.267	4.36404	0	33.1238	0.621037	1.29623	19.5079	1.32801	415.745	331.477	5.31	0	4.80088	2635.35	3.20429	2.89513	1	nan	nan
03/04/2018 22:30	nan	-130.554	-68.0403	12.022	nan	0	33.1264	0.597088	1.29005	19.4623	1.31601	415.839	331.539	5.26	0	4.75568	2636.36	3.15074	2.84032	1	nan	nan
03/04/2018 22:40	nan	-130.466	-68.0479	12.152	nan	0	33.126	0.583287	1.28523	19.409	1.31517	415.691	331.421	5.31	0	4.80088	2637.14	3.2032	2.89415	1	nan	nan
03/04/2018 22:50	nan	-130.379	-68.0559	12.086	nan	0	33.128	0.576013	1.2767	19.3645	1.30414	416.214	331.826	5.33	0	4.81897	2638.53	3.22365	2.91523	1	nan	nan
03/04/2018 23:00	nan	-130.291	-68.0636	12.255	nan	0	33.1283	0.577169	1.28234	19.3185	1.30734	415.713	331.429	5.34	0	4.82801	2637.61	3.23488	2.92668	1	nan	nan
03/04/2018 23:10	nan	-130.204	-68.0706	12.226	nan	0	33.1317	0.568728	1.27696	19.2782	1.30143	416.423	331.983	5.37	0	4.85513	2638.49	3.26645	2.95917	1	nan	nan
03/04/2018 23:20	nan	-130.117	-68.0772	11.847	nan	0	33.1302	0.559167	1.28001	19.2308	1.30235	416.336	331.918	5.27	0	4.76472	2637.99	3.16032	2.85025	1	nan	nan
03/04/2018 23:30	nan	-130.03	-68.0837	12.231	nan	0	33.1314	0.54344	1.2758	19.1702	1.29963	416.31	331.893	5.26	0	4.75568	2638.68	3.14936	2.83908	1	nan	nan
03/04/2018 23:40	nan	-129.941	-68.0888	12.058	nan	0	33.1329	0.521908	1.27297	19.1057	1.29164	416.095	331.712	5.21	0	4.71047	2639.14	3.09661	2.78512	1	nan	nan
03/04/2018 23:50	nan	-129.851	-68.0937	12.462	nan	0	33.1329	0.514273	1.26313	19.0393	1.2857	416.285	331.861	5.33	0	4.81897	2640.74	3.2223	2.91401	1	nan	nan
04/04/2018 00:00	nan	-129.761	-68.0995	12.366	nan	0	33.1306	0.482912	1.26452	18.9771	1.28596	416.052	331.681	5.43	0	4.90938	2640.52	3.32986	3.0245	1	nan	nan
04/04/2018 00:10	nan	-129.674	-68.1101	12.567	nan	0	33.132	0.466877	1.25654	18.9176	1.28437	415.947	331.592	5.45	0	4.92746	2641.81	3.35073	3.04608	1	nan	nan
04/04/2018 00:20	nan	-129.587	-68.1219	12.442	nan	0	33.1343	0.461688	1.23012	18.8652	1.25865	416.642	332.125	5.41	0	4.8913	2646.13	3.30473	2.99908	1	nan	nan
04/04/2018 00:30	nan	-129.5	-68.1337	12.467	nan	0	33.1361	0.490437	1.22812	18.8312	1.2527	416.791	332.237	5.33	0	4.81897	2646.45	3.21882	2.91086	1	nan	nan
04/04/2018 00:40	nan	-129.412	-68.1449	12.533	nan	0	33.1381	0.555562	1.25121	18.8415	1.26475	416.937	332.356	5.42	0	4.90034	2642.68	3.31768	3.01214	1	nan	nan
04/04/2018 00:50	11.6748	-129.324	-68.1547	12.393	1.63569	0	33.1484	0.603382	1.25791	18.8847	1.27486	416.7	332.149	5.53	0	4.99979	2641.59	3.43832	3.13629	1	9.63398	8.7877
04/04/2018 01:00	8.97243	-129.235	-68.1646	12.497	1.44323	0	33.1629	0.644044	1.25936	18.9375	1.28074	415.44	331.116	5.51	0	4.98171	2641.35	3.41651	3.11379	1	7.35706	6.70517
04/04/2018 01:10	9.23353	-129.146	-68.1746	12.565	0.393732	0	33.1637	0.680525	1.25795	18.993	1.27933	415.367	331.055	5.56	0	5.02691	2641.59	3.47141	3.17042	1	7.6928	7.02579
04/04/2018 01:20	8.23337	-129.057	-68.1843	12.198	0.410137	0	33.1621	0.708488	1.25495	19.0513	1.27508	415.658	331.288	5.54	0	5.00883	2642.07	3.44902	3.14736	1	6.81529	6.2192
04/04/2018 01:30	4.67376	-128.968	-68.1929	12.507	2.35121	0	33.1649	0.740013	1.26089	19.1078	1.27968	415.743	331.352	5.46	0	4.9365	2641.11	3.36205	3.05767	1	3.77122	3.4298
04/04/2018 01:40	1.14617	-128.879	-68.2009	12.235	1.6338	0	33.1767	0.76672	1.27649	19.1666	1.29433	415.182	330.887	5.52	0	4.99075	2638.57	3.4293	3.12675	1	0.943336	0.860111
04/04/2018 01:50	3.64973	-128.789	-68.2081	12.345	0.346943	0	33.1824	0.774763	1.30004	19.2202	1.31201	414.311	330.191	5.65	0	5.10828	2634.74	3.57622	3.27814	1	3.13254	2.87144
04/04/2018 02:00	nan	-128.698	-68.2156	12.44	1.60637	0	33.1827	0.788269	1.29354	19.2763	1.31529	414.297	330.181	6.04	0	5.46089	2635.79	4.02626	3.74556	1	nan	nan
04/04/2018 02:10	6.34099	-128.607	-68.2231	12.672	1.61723	0	33.1813	0.792452	1.28717	19.3321	1.30887	414.662	330.472	6.37	0	5.75925	2636.83	4.42737	4.16521	1	6.73773	6.33877
04/04/2018 02:20	4.66905	-128.515	-68.2304	12.405	2.07757	0	33.1747	0.794405	1.29029	19.387	1.30937	415.087	330.825	6.45	0	5.83158	2636.32	4.52807	4.2709	1	5.07403	4.78585
04/04/2018 02:30	1.28477	-128.424	-68.2376	12.302	2.29089	0	33.1909	0.803577	1.27762	19.4391	1.29749	414.866	330.605	7.43	0	6.71762	2638.38	5.84415	5.6651	1	1.80201	1.7468
04/04/2018 02:40	2.32974	-128.334	-68.2446	12.264	1.28367	0	33.1838	0.804235	1.28964	19.4935	1.30709	414.859	330.622	12.2	0	11.0303	2636.43	14.6375	15.2796	1	8.18439	8.54337
04/04/2018 02:50	4.30131	-128.244	-68.2513	12.25	1.35527	0	33.197	0.806128	1.29088	19.5462	1.31582	414.307	330.158	12.2	0	11.0303	2636.22	14.6381	15.2801	1	15.1111	15.7739
04/04/2018 03:00	2.7888	-128.154	-68.2577	12.368	0.943454	0	33.2016	0.797258	1.28456	19.5971	1.30641	414.07	329.953	12.38	0	11.193	2637.25	15.0441	15.7313	1	10.0692	10.5292
04/04/2018 03:10	0.767787	-128.063	-68.2647	12.516	2.27333	0	33.2118	0.779985	1.28026	19.6441	1.30357	414.173	330.009	12.34	0	11.1569	2637.95	14.9507	15.6277	1	2.75496	2.8797
04/04/2018 03:20	3.73621	-127.971	-68.2708	12.67	0.915029	0	33.2417	0.778647	1.26055	19.6914	1.29214	413.305	329.244	12.13	0	10.967	2641.16	14.4671	15.0912	1	12.9725	13.5321
04/04/2018 03:30	1.95494	-127.878	-68.2763	12.478	0.650243	0	33.2394	0.792293	1.25094	19.7375	1.27172	413.017	329.006	12.45	0	11.2563	2642.73	15.1888	15.8932	1	7.12638	7.45688
04/04/2018 03:40	nan	-127.786	-68.282	12.848	1.06036	0	33.2281	0.795988	1.27941	19.7826	1.29086	413.345	329.306	12.58	0	11.3738	2638.09	15.5024	16.2411	1	nan	nan
04/04/2018 03:50	0.858897	-127.694	-68.288	12.441	1.89606	0	33.2276	0.800488	1.28314	19.8267	1.3136	413.065	329.097	12.37	0	11.184	2637.48	15.0205	15.7052	1	3.09626	3.2374
04/04/2018 04:00	0.202401	-127.602	-68.294	12.371	1.37079	0	33.2257	0.805329	1.25527	19.8717	1.28498	413.146	329.148	12.16	0	10.9941	2642.02	14.532	15.1634	1	0.705911	0.736584
04/04/2018 04:10	2.2555	-127.511	-68.3006	12.417	1.06528	0	33.2381	0.797485	1.26144	19.9152	1.28484	412.785	328.833	11.98	0	10.8314	2641.02	14.1331	14.7207	1	7.65054	7.96858
04/04/2018 04:20	4.38456	-127.421	-68.3087	12.302	0.534163	0	33.2466	0.792228	1.26149	19.9545	1.28909	412.319	328.445	11.46	0	10.3612	2641.01	13.0042	13.4705	1	13.6843	14.1749
04/04/2018 04:30	1.26764	-127.331	-68.3177	12.645	1.28824	0	33.2547	0.786828	1.25991	19.9947	1.29062	412.27	328.389	10.78	0	9.74643	2641.27	11.598	11.9187	1	3.52849	3.62608
04/04/2018 04:40	3.42635	-127.241	-68.3288	12.248	-0.455001	0	33.2705	0.786142	1.24466	20.0338	1.2718	411.847	328.004	9.95	0	8.996	2643.75	9.98601	10.1493	1	8.21174	8.34599
04/04/2018 04:50	11.6096	-127.153	-68.3401	12.506	0.190295	0	33.2756	0.785558	1.24429	20.0727	1.27035	411.697	327.873	8.39	0	7.58558	2643.81	7.28877	7.21618	1	20.3088	20.1065
04/04/2018 05:00	5.43507	-127.064	-68.3511	12.545	1.37584	0	33.2684	0.788247	1.24163	20.1075	1.27294	411.802	327.974	9.64	0	8.71573	2644.25	9.41565	9.52581	1	12.2819	12.4256
04/04/2018 05:10	nan	-126.973	-68.361	12.582	3.2927	0	33.2596	0.778053	1.24573	20.1432	1.26995	412.087	328.219	11.03	0	9.97246	2643.58	12.1002	12.4725	1	nan	nan
04/04/2018 05:20	1.04555	-126.882	-68.3696	12.726	-0.0212799	0	33.2528	0.776813	1.23614	20.1766	1.26647	412.553	328.604	11.3	0	10.2166	2645.14	12.6564	13.0867	1	3.17588	3.28387
04/04/2018 05:30	nan	-126.789	-68.3773	12.6	0.851675	0	33.2361	0.778307	1.23468	20.2073	1.26487	413.572	329.451	12	0	10.8495	2645.38	14.1658	14.7577	1	nan	nan
04/04/2018 05:40	nan	-126.697	-68.3853	12.558	1.15142	0	33.2208	0.780533	1.24384	20.2369	1.2705	414.012	329.841	12.29	0	11.1116	2643.89	14.8203	15.4839	1	nan	nan
04/04/2018 05:50	4.55929	-126.605	-68.3934	12.64	1.39937	0	33.2272	0.778945	1.24106	20.2656	1.26865	414.352	330.096	11.76	0	10.6325	2644.34	13.6412	14.176	1	14.9266	15.5118
04/04/2018 06:00	5.52064	-126.513	-68.4015	12.771	2.12458	0	33.2313	0.785712	1.23901	20.2941	1.26607	413.941	329.757	11.44	0	10.3431	2644.67	12.9528	13.4142	1	17.1618	17.7732
04/04/2018 06:10	11.0585	-126.42	-68.4093	12.611	1.12959	0	33.2184	0.778543	1.25112	20.3215	1.27565	414.432	330.184	10.36	0	9.36669	2642.7	10.7668	11.0051	1	28.5756	29.2079
04/04/2018 06:20	2.76464	-126.327	-68.4171	12.701	0.1929	0	33.2228	0.780545	1.24116	20.3485	1.27392	414.824	330.485	8.83	0	7.98339	2644.32	8.00612	7.99214	1	5.31217	5.30289
04/04/2018 06:30	0.669881	-126.235	-68.4252	12.614	0.867156	0	33.2196	0.788227	1.24145	20.3756	1.27002	414.379	330.135	7.91	0	7.1516	2644.27	6.54297	6.41355	1	1.05192	1.03112
04/04/2018 06:40	3.77476	-126.144	-68.4336	12.653	1.29134	0	33.2245	0.795363	1.24727	20.4068	1.28001	413.651	329.55	8.04	0	7.26913	2643.33	6.74206	6.62728	1	6.10792	6.00394
04/04/2018 06:50	nan	-126.053	-68.4418	12.364	1.43018	0	33.2317	0.793463	1.24308	20.4354	1.27815	413.925	329.752	9.38	0	8.48066	2644.01	8.95129	9.01931	1	nan	nan
04/04/2018 07:00	3.85588	-125.963	-68.4502	12.457	-0.611391	0	33.2504	0.771539	1.23779	20.4668	1.2733	413.031	328.994	9.28	0	8.39024	2644.87	8.7742	8.82658	1	8.11974	8.16821
04/04/2018 07:10	1.51458	-125.874	-68.4589	12.228	0.777512	0	33.2543	0.757795	1.20206	20.4946	1.24922	413.003	328.948	9.11	0	8.23654	2650.71	8.47027	8.49678	1	3.07894	3.08858
04/04/2018 07:20	nan	-125.785	-68.4675	12.048	1.58521	0	33.2565	0.773035	1.18947	20.5205	1.22177	413.964	329.691	9.57	0	8.65244	2652.77	9.27444	9.37288	1	nan	nan
04/04/2018 07:30	6.31559	-125.697	-68.4758	12.196	1.02941	0	33.2464	0.768107	1.20876	20.5473	1.23519	413.887	329.661	9.23	0	8.34504	2649.61	8.67926	8.72391	1	13.1555	13.2232
04/04/2018 07:40	6.28049	-125.608	-68.4831	11.945	1.36692	0	33.247	0.761752	1.214	20.575	1.25045	413.924	329.699	9.7	0	8.76997	2648.76	9.51645	9.63654	1	14.3443	14.5253
04/04/2018 07:50	2.25972	-125.52	-68.4903	12.158	0.390333	0	33.2727	0.748573	1.20033	20.5963	1.24416	413.85	329.578	10.05	0	9.08642	2650.99	10.1593	10.3401	1	5.50975	5.60781
04/04/2018 08:00	1.0674	-125.431	-68.4976	12.021	1.29627	0	33.2901	0.743185	1.18425	20.6208	1.22352	413.494	329.243	8.59	0	7.7664	2653.63	7.59696	7.55032	1	1.94616	1.93422
04/04/2018 08:10	nan	-125.342	-68.5049	12.155	1.02417	0	33.2967	0.748097	1.18602	20.6439	1.22309	413.328	329.095	8.43	0	7.62174	2653.34	7.33946	7.27207	1	nan	nan
04/04/2018 08:20	1.34898	-125.252	-68.5122	12.076	0.512987	0	33.2956	0.750468	1.18239	20.6664	1.22413	412.943	328.791	8.1	0	7.32338	2653.93	6.82072	6.71311	1	2.20825	2.17341
04/04/2018 08:30	nan	-125.162	-68.5181	12.078	2.36942	0	33.2954	0.749303	1.18844	20.6897	1.21952	413.331	329.098	9.88	0	8.93272	2652.94	9.83888	9.98962	1	nan	nan
04/04/2018 08:40	1.29456	-125.072	-68.5242	12.319	1.11746	0	33.2914	0.763065	1.20376	20.7115	1.23722	413.426	329.194	10.37	0	9.37574	2650.43	10.7705	11.0103	1	3.34631	3.42082
04/04/2018 08:50	9.81492	-124.983	-68.5334	12.311	1.21888	0	33.291	0.769138	1.21385	20.7314	1.24913	413.094	328.938	8.51	0	7.69407	2648.78	7.47428	7.41711	1	17.6063	17.4716
04/04/2018 09:00	nan	-124.894	-68.5434	12.384	2.98877	0	33.296	0.775903	1.22316	20.7537	1.26183	413.152	328.98	7.28	0	6.582	2647.26	5.62221	5.42954	1	nan	nan
04/04/2018 09:10	nan	-124.806	-68.5523	12.114	-0.0809102	0	33.3068	0.789213	1.22145	20.7769	1.26043	414.001	329.631	7	0	6.32885	2647.54	5.23636	5.01965	1	nan	nan
04/04/2018 09:20	2.33819	-124.717	-68.5609	12.143	2.22557	0	33.303	0.785523	1.24225	20.7973	1.27766	413.865	329.542	7.64	0	6.90749	2644.14	6.14147	5.98333	1	3.44638	3.35764
04/04/2018 09:30	nan	-124.628	-68.567	12.073	3.21409	0	33.297	0.778893	1.2298	20.8202	1.28012	414.072	329.722	8.99	0	8.12805	2646.18	8.27263	8.2815	1	nan	nan
04/04/2018 09:40	nan	-124.537	-68.5675	12.093	2.28187	0	33.2851	0.760602	1.22596	20.8416	1.26295	414.296	329.917	12.31	0	11.1297	2646.8	14.8575	15.5258	1	nan	nan
04/04/2018 09:50	2.42985	-124.445	-68.5667	12.107	1.57881	0	33.294	0.766795	1.21035	20.8594	1.25612	414.602	330.136	13.32	0	12.0429	2649.36	17.2306	18.1693	1	10.0483	10.5956
04/04/2018 10:00	0.773046	-124.353	-68.566	12.326	0.737079	0	33.2928	0.772108	1.21513	20.8798	1.2525	414.54	330.087	13.36	0	12.0791	2648.57	17.3311	18.2812	1	3.21545	3.39174
04/04/2018 10:10	nan	-124.261	-68.5668	12.205	-0.0318484	0	33.2932	0.75929	1.22655	20.8968	1.26809	414.272	329.882	12.97	0	11.7265	2646.71	16.394	17.2356	1	nan	nan
04/04/2018 10:20	nan	-124.17	-68.5682	12.171	0.594319	0	33.2811	0.760462	1.21062	20.9117	1.25599	414.663	330.213	12.58	0	11.3738	2649.31	15.4695	16.2067	1	nan	nan
04/04/2018 10:30	nan	-124.078	-68.5698	12.14	1.41503	0	33.2766	0.754528	1.20678	20.9305	1.24961	414.993	330.482	11.68	0	10.5601	2649.94	13.4534	13.969	1	nan	nan
04/04/2018 10:40	1.41266	-123.986	-68.5708	12.285	2.02557	0	33.2762	0.745685	1.20601	20.9481	1.25076	414.846	330.368	11.35	0	10.2618	2650.06	12.7496	13.1905	1	4.3226	4.4721
04/04/2018 10:50	nan	-123.894	-68.5729	12.325	-0.0587323	0	33.2804	0.742013	1.20245	20.9648	1.24434	414.936	330.425	11.83	0	10.6958	2650.65	13.7776	14.3282	1	nan	nan
04/04/2018 11:00	2.25351	-123.801	-68.5778	12.379	0.224834	0	33.2772	0.752814	1.20658	20.9804	1.24721	414.854	330.369	10.32	0	9.33053	2649.97	10.6749	10.9053	1	5.77345	5.89806
04/04/2018 11:10	nan	-123.708	-68.5827	12.283	-0.226027	0	33.2713	0.759757	1.21141	20.9987	1.25359	415.206	330.667	10.85	0	9.80971	2649.18	11.7214	12.056	1	nan	nan
04/04/2018 11:20	nan	-123.615	-68.587	12.457	1.23553	0	33.2682	0.761277	1.21934	21.0158	1.2568	415.215	330.683	10.26	0	9.27628	2647.89	10.5638	10.7831	1	nan	nan
04/04/2018 11:30	nan	-123.522	-68.5895	12.278	3.21071	0	33.2792	0.763962	1.22505	21.0358	1.26604	415.211	330.661	10.91	0	9.86396	2646.95	11.8478	12.1948	1	nan	nan
04/04/2018 11:40	3.17891	-123.429	-68.5889	12.406	2.08213	0	33.2914	0.767938	1.22837	21.0499	1.27408	415.274	330.688	11.75	0	10.6234	2646.41	13.6141	14.1464	1	10.3867	10.7928
04/04/2018 11:50	nan	-123.334	-68.5875	12.53	0.659223	0	33.3053	0.772808	1.23914	21.0633	1.27855	414.974	330.421	12.1	0	10.9399	2644.65	14.3904	15.0067	1	nan	nan
04/04/2018 12:00	nan	-123.24	-68.5868	12.533	2.25438	0	33.3099	0.785493	1.23103	21.0773	1.27664	414.786	330.259	11.73	0	10.6053	2645.98	13.5718	14.0994	1	nan	nan
04/04/2018 12:10	3.52693	-123.146	-68.587	12.519	1.79032	0	33.2995	0.791453	1.23259	21.0925	1.2779	415.102	330.535	11.1	0	10.0357	2645.72	12.2392	12.6262	1	10.36	10.6876
04/04/2018 12:20	nan	-123.052	-68.5875	12.522	2.64401	0	33.292	0.787385	1.23513	21.1053	1.27771	415.517	330.883	10.65	0	9.62889	2645.31	11.3297	11.6241	1	nan	nan
04/04/2018 12:30	nan	-122.957	-68.5882	12.344	0.755895	0	33.2702	0.788573	1.22446	21.1176	1.2658	416.375	331.608	10.69	0	9.66505	2647.05	11.4055	11.7077	1	nan	nan
04/04/2018 12:40	nan	-122.862	-68.5885	12.465	2.00429	0	33.2631	0.790895	1.19213	21.1293	1.25405	416.407	331.642	10.07	0	9.1045	2652.34	10.1944	10.3787	1	nan	nan
04/04/2018 12:50	1.37699	-122.768	-68.5881	12.507	2.12349	0	33.2512	0.78375	1.16604	21.1413	1.21446	415.791	331.154	10.17	0	9.19491	2656.61	10.375	10.5773	1	3.42871	3.49558
04/04/2018 13:00	0.821148	-122.673	-68.5861	12.355	2.18863	0	33.2457	0.79059	1.15593	21.1536	1.20163	416.043	331.359	10.91	0	9.86396	2658.27	11.8225	12.1688	1	2.32993	2.39818
04/04/2018 13:10	nan	-122.58	-68.5826	12.452	0.821838	0	33.2438	0.803343	1.17308	21.1634	1.20956	416.307	331.578	11.42	0	10.3251	2655.46	12.8841	13.3402	1	nan	nan
04/04/2018 13:20	nan	-122.486	-68.5805	12.567	1.70813	0	33.2358	0.798603	1.19563	21.1767	1.23624	416.166	331.501	11.61	0	10.4968	2651.76	13.298	13.7974	1	nan	nan
04/04/2018 13:30	1.56816	-122.392	-68.5794	12.397	2.15608	0	33.2387	0.800912	1.18597	21.1913	1.23331	416.225	331.54	10.73	0	9.70122	2653.34	11.4716	11.7815	1	4.31743	4.43408
04/04/2018 13:40	nan	-122.298	-68.5782	12.538	0.88625	0	33.2389	0.779448	1.18809	21.1949	1.22477	416.013	331.365	10.46	0	9.45711	2653	10.9399	11.1968	1	nan	nan
04/04/2018 13:50	nan	-122.202	-68.5773	12.608	1.60822	0	33.2393	0.75157	1.18778	21.1864	1.23456	416.054	331.403	10.33	0	9.33957	2653.05	10.688	10.9201	1	nan	nan
04/04/2018 14:00	nan	-122.107	-68.5774	12.689	1.05337	0	33.2369	0.717495	1.19453	21.1669	1.23943	415.891	331.281	7.97	0	7.20585	2651.94	6.62434	6.5018	1	nan	nan
04/04/2018 14:10	nan	-122.011	-68.5774	12.606	1.96436	0	33.2407	0.666747	1.17089	21.1403	1.21936	416.053	331.389	8.35	0	7.54941	2655.82	7.2088	7.13137	1	nan	nan
04/04/2018 14:20	0.0700353	-121.915	-68.5778	12.489	1.53092	0	33.2638	0.616495	1.14755	21.1128	1.2029	416.023	331.303	7.68	0	6.94365	2659.65	6.18208	6.0285	1	0.103911	0.10133
04/04/2018 14:30	nan	-121.821	-68.5779	12.523	1.47688	0	33.2947	0.594863	1.09901	21.081	1.15366	416.535	331.609	7.69	0	6.95269	2667.63	6.18748	6.03516	1	nan	nan
04/04/2018 14:40	0.117776	-121.726	-68.5781	12.589	3.14556	0	33.291	0.58617	1.09499	21.0486	1.13477	416.74	331.769	7.49	0	6.77187	2668.29	5.8969	5.72461	1	0.166684	0.161814
04/04/2018 14:50	nan	-121.631	-68.5793	12.562	0.129633	0	33.2856	0.587267	1.09621	21.0264	1.13237	416.688	331.739	7.29	0	6.59104	2668.09	5.61419	5.42318	1	nan	nan
04/04/2018 15:00	nan	-121.536	-68.5811	12.517	2.12454	0	33.2889	0.631502	1.08834	21.024	1.13148	416.291	331.414	6.11	0	5.52418	2669.39	4.084	3.80869	1	nan	nan
04/04/2018 15:10	nan	-121.442	-68.5807	12.427	1.38272	0	33.2752	0.657585	1.10101	21.0316	1.12973	416.318	331.465	6.44	0	5.82254	2667.3	4.48918	4.23287	1	nan	nan
04/04/2018 15:20	nan	-121.347	-68.5806	12.601	1.30403	0	33.27	0.680053	1.11939	21.044	1.14803	416.177	331.377	7.09	0	6.41022	2664.27	5.34196	5.13336	1	nan	nan
04/04/2018 15:30	0.941521	-121.253	-68.5808	12.545	0.73288	0	33.2729	0.702787	1.1266	21.0561	1.16197	416.162	331.367	6.91	0	6.24748	2663.09	5.10036	4.87711	1	1.1525	1.10205
04/04/2018 15:40	nan	-121.158	-68.5811	12.408	-0.150782	0	33.2733	0.71684	1.13312	21.0694	1.16824	415.753	331.045	6.35	0	5.74117	2662.02	4.3816	4.11947	1	nan	nan
04/04/2018 15:50	nan	-121.064	-68.5813	12.46	0.598048	0	33.2708	0.724813	1.13532	21.0854	1.17018	415.965	331.22	7.02	0	6.34693	2661.65	5.24948	5.03498	1	nan	nan
04/04/2018 16:00	nan	-120.969	-68.5815	12.571	-0.0878964	0	33.287	0.736314	1.12811	21.102	1.16527	415.66	330.937	7.3	0	6.60008	2662.84	5.63372	5.44342	1	nan	nan
04/04/2018 16:10	0.984303	-120.875	-68.5818	12.461	0.0707177	0	33.2841	0.7414	1.12572	21.1164	1.16255	415.302	330.657	7.4	0	6.6905	2663.23	5.77421	5.59317	1	1.36406	1.32129
04/04/2018 16:20	0.949274	-120.78	-68.5811	12.425	0.390041	0	33.3072	0.751728	1.13195	21.1286	1.16619	414.953	330.329	7.64	0	6.90749	2662.21	6.1206	5.963	1	1.39443	1.35852
04/04/2018 16:30	nan	-120.686	-68.581	12.535	0.744977	0	33.3096	0.769667	1.13406	21.1438	1.16042	414.879	330.261	7.23	0	6.5368	2661.86	5.53712	5.34051	1	nan	nan
04/04/2018 16:40	nan	-120.591	-68.5811	12.643	0.902861	0	33.3255	0.765218	1.16584	21.155	1.19394	414.276	329.766	7.3	0	6.60008	2656.64	5.64028	5.44977	1	nan	nan
04/04/2018 16:50	nan	-120.496	-68.5813	12.414	0.67152	0	33.3226	0.765073	1.16782	21.1679	1.20707	414.346	329.837	7.28	0	6.582	2656.32	5.61262	5.42028	1	nan	nan
04/04/2018 17:00	nan	-120.402	-68.5824	12.396	1.69757	0	33.3189	0.756097	1.14549	21.1815	1.18537	414.472	329.932	6.77	0	6.1209	2659.98	4.91825	4.68421	1	nan	nan
04/04/2018 17:10	nan	-120.308	-68.5839	12.561	-0.421411	0	33.3164	0.748883	1.1361	21.1929	1.17633	414.67	330.09	7.38	0	6.67241	2661.53	5.74773	5.56476	1	nan	nan
04/04/2018 17:20	nan	-120.213	-68.5857	12.563	1.48005	0	33.3161	0.73153	1.13657	21.2037	1.17475	414.699	330.112	6.96	0	6.29268	2661.45	5.16883	4.94947	1	nan	nan
04/04/2018 17:30	nan	-120.118	-68.5869	12.413	0.381496	0	33.3182	0.699297	1.11233	21.1981	1.15464	414.828	330.198	6.93	0	6.26556	2665.44	5.1248	4.90322	1	nan	nan
04/04/2018 17:40	nan	-120.024	-68.5877	12.547	1.00254	0	33.3181	0.65985	1.12082	21.1755	1.14853	414.833	330.198	7.1	0	6.41926	2664.04	5.35584	5.14808	1	nan	nan
04/04/2018 17:50	nan	-119.93	-68.5887	12.381	0.560928	0	33.319	0.658195	1.11521	21.1668	1.15342	414.872	330.23	7.45	0	6.7357	2664.96	5.84341	5.66717	1	nan	nan
04/04/2018 18:00	2.22962	-119.835	-68.5898	12.466	1.83516	0	33.3257	0.689536	1.08721	21.1726	1.13289	415.003	330.307	7.51	0	6.78995	2669.57	5.92415	5.75384	1	3.17006	3.07893
04/04/2018 18:10	1.49948	-119.74	-68.5907	12.541	1.16276	0	33.3241	0.696478	1.09403	21.1863	1.12164	415.012	330.31	7.22	0	6.52775	2668.45	5.51641	5.31917	1	1.98521	1.91423
04/04/2018 18:20	nan	-119.646	-68.5917	12.503	0.056372	0	33.3282	0.693945	1.0894	21.1984	1.13069	414.918	330.231	7.38	0	6.67241	2669.21	5.73945	5.55674	1	nan	nan
04/04/2018 18:30	nan	-119.552	-68.5913	12.489	0.506947	0	33.3389	0.687067	1.08235	21.2108	1.11897	414.247	329.666	7.21	0	6.51871	2670.38	5.50059	5.30253	1	nan	nan
04/04/2018 18:40	nan	-119.457	-68.5905	12.547	-1.00692	0	33.3405	0.679922	1.05483	21.2208	1.0965	414.447	329.807	7.85	0	7.09735	2674.92	6.41555	6.28033	1	nan	nan
04/04/2018 18:50	0.1728	-119.362	-68.5897	12.572	1.16371	0	33.3395	0.67346	1.0452	21.229	1.07984	414.687	329.99	8.33	0	7.53133	2676.51	7.14936	7.06975	1	0.296498	0.293197
04/04/2018 19:00	4.41907	-119.267	-68.5889	12.588	0.259733	0	33.34	0.667222	1.04904	21.2313	1.08119	414.666	329.974	8.24	0	7.44996	2675.88	7.00923	6.91863	1	7.43383	7.33774
04/04/2018 19:10	4.87371	-119.172	-68.5894	12.633	-0.869111	0	33.3377	0.67539	1.05622	21.2354	1.08788	414.642	329.963	8	0	7.23297	2674.69	6.64156	6.52292	1	7.76857	7.62979
04/04/2018 19:20	2.65344	-119.077	-68.5913	12.7	-0.608368	0	33.3398	0.674027	1.05943	21.2413	1.09043	414.688	329.997	7.32	0	6.61817	2674.16	5.64977	5.46169	1	3.59791	3.47814
04/04/2018 19:30	nan	-118.981	-68.5919	12.527	0.622749	0	33.3376	0.659015	1.06089	21.2425	1.1006	414.552	329.901	7.35	0	6.64529	2673.92	5.69213	5.5068	1	nan	nan
04/04/2018 19:40	nan	-118.887	-68.5899	12.471	-0.211269	0	33.3377	0.645212	1.04909	21.2415	1.08995	414.752	330.053	8.17	0	7.38667	2675.87	6.90055	6.80159	1	nan	nan
04/04/2018 19:50	nan	-118.792	-68.59	12.552	-0.214047	0	33.3415	0.63393	1.05	21.2375	1.08437	414.616	329.932	7.98	0	7.21489	2675.72	6.60997	6.4891	1	nan	nan
04/04/2018 20:00	5.99461	-118.696	-68.591	12.606	-0.776004	0	33.3443	0.63159	1.05682	21.2309	1.09099	414.472	329.815	7.4	0	6.6905	2674.59	5.76194	5.58128	1	8.28973	8.02982
04/04/2018 20:10	nan	-118.6	-68.5917	12.552	-0.714836	0	33.3418	0.638415	1.06163	21.2258	1.1019	414.331	329.716	7.65	0	6.91653	2673.8	6.12189	5.96565	1	nan	nan
04/04/2018 20:20	0.99622	-118.505	-68.5927	12.592	0.795835	0	33.3451	0.669715	1.06541	21.2251	1.09951	414.302	329.684	7.67	0	6.93461	2673.17	6.1518	5.99758	1	1.47085	1.43398
04/04/2018 20:30	nan	-118.409	-68.5933	12.597	0.694077	0	33.349	0.630478	1.10745	21.2208	1.13413	412.775	328.482	7.47	0	6.75378	2666.24	5.87056	5.69627	1	nan	nan
04/04/2018 20:40	nan	-118.314	-68.5927	12.58	-1.94024	0	33.3222	0.595697	1.05717	21.2034	1.12012	414.505	329.91	7.7	0	6.96173	2674.53	6.19414	6.04305	1	nan	nan
04/04/2018 20:50	nan	-118.218	-68.5927	12.713	0.45628	0	33.3207	0.561265	1.03617	21.1808	1.083	416.657	331.603	7.74	0	6.9979	2678.01	6.24888	6.10204	1	nan	nan
04/04/2018 21:00	nan	-118.122	-68.5943	12.752	1.44677	0	33.3215	0.558585	1.02149	21.1535	1.06924	416.669	331.602	7.02	0	6.34693	2680.44	5.23106	5.0173	1	nan	nan
04/04/2018 21:10	nan	-118.026	-68.5958	12.608	nan	0	33.3247	0.566677	1.02464	21.1251	1.05693	417.223	332.027	6.9	0	6.23844	2679.91	5.07104	4.84771	1	nan	nan
04/04/2018 21:20	nan	-117.931	-68.5947	12.784	nan	0	33.3431	0.573032	1.06834	21.0943	1.0995	413.918	329.383	7.28	0	6.582	2672.69	5.5954	5.40365	1	nan	nan
04/04/2018 21:30	nan	-117.835	-68.5909	12.712	nan	0	33.3461	0.550437	1.09143	21.0548	1.12352	412.809	328.508	7.93	0	7.16968	2668.88	6.54285	6.41624	1	nan	nan
04/04/2018 21:40	nan	-117.74	-68.5861	12.746	nan	0	33.3139	0.532872	1.05983	21.0117	1.10748	414.064	329.57	8.49	0	7.67599	2674.09	7.40675	7.34727	1	nan	nan
04/04/2018 21:50	nan	-117.643	-68.5841	12.758	nan	0	33.3017	0.50986	1.05085	20.9625	1.09279	415.241	330.525	8.1	0	7.32338	2675.58	6.79308	6.6859	1	nan	nan
04/04/2018 22:00	nan	-117.546	-68.5819	12.8	nan	0	33.3048	0.491144	1.04193	20.9047	1.0785	414.408	329.846	8.05	0	7.27817	2677.05	6.7147	6.6018	1	nan	nan
04/04/2018 22:10	nan	-117.451	-68.5783	12.806	nan	0	33.3167	0.471707	1.03129	20.8485	1.06979	414.687	330.036	8.62	0	7.79352	2678.81	7.60977	7.56732	1	nan	nan
04/04/2018 22:20	nan	-117.355	-68.5751	12.694	nan	0	33.3339	0.453807	1.01875	20.7904	1.05611	414.365	329.732	8.22	0	7.43188	2680.89	6.97156	6.87865	1	nan	nan
04/04/2018 22:30	nan	-117.259	-68.5724	12.618	nan	0	33.3412	0.43467	1.00372	20.7314	1.04199	412.967	328.594	8.05	0	7.27817	2683.38	6.70678	6.59401	1	nan	nan
04/04/2018 22:40	nan	-117.163	-68.5695	12.809	nan	0	33.3424	0.432202	0.99639	20.6707	1.0274	412.833	328.476	7.89	0	7.13352	2684.6	6.46369	6.33306	1	nan	nan
04/04/2018 22:50	nan	-117.067	-68.5664	12.692	nan	0	33.3281	0.430233	0.992698	20.6112	1.02394	414.022	329.451	8.01	0	7.24201	2685.21	6.6437	6.52642	1	nan	nan
04/04/2018 23:00	nan	-116.971	-68.5632	12.696	nan	0	33.2985	0.43481	0.996278	20.5488	1.02125	414.809	330.144	8.13	0	7.3505	2684.62	6.82767	6.72417	1	nan	nan
04/04/2018 23:10	nan	-116.876	-68.5601	12.611	nan	0	33.271	0.437407	1.01398	20.4928	1.03616	414.813	330.218	7.94	0	7.17872	2681.68	6.54226	6.41707	1	nan	nan
04/04/2018 23:20	nan	-116.78	-68.5568	12.778	0.554522	0	33.2659	0.427375	1.01629	20.4333	1.0423	415.377	330.683	8.03	0	7.26009	2681.3	6.67893	6.56383	1	nan	nan
04/04/2018 23:30	4.37169	-116.683	-68.554	12.638	0.696438	0	33.275	0.420033	1.01012	20.3816	1.04287	415.36	330.649	7.92	0	7.16064	2682.32	6.51141	6.38401	1	6.8318	6.69814
04/04/2018 23:40	2.10457	-116.588	-68.5514	12.738	0.187269	0	33.2842	0.430117	0.993112	20.341	1.02193	413.986	329.521	7.63	0	6.89844	2685.14	6.07988	5.92195	1	3.07092	2.99115
04/04/2018 23:50	0.61962	-116.492	-68.5475	12.688	-0.495162	0	33.283	0.435058	0.99208	20.3039	1.01421	414.887	330.236	7.52	0	6.79899	2685.31	5.92108	5.75224	1	0.880517	0.855409
05/04/2018 00:00	nan	-116.396	-68.5434	12.637	-0.0841163	0	33.2672	0.436781	0.998963	20.2688	1.02694	415.078	330.432	7.43	0	6.71762	2684.17	5.79409	5.61657	1	nan	nan
05/04/2018 00:10	nan	-116.301	-68.5412	12.5	2.85115	0	33.2631	0.459132	0.988358	20.2563	1.01243	415.823	331.026	7.04	0	6.36501	2685.93	5.25267	5.04077	1	nan	nan
05/04/2018 00:20	nan	-116.206	-68.5386	12.678	1.98928	0	33.2629	0.52216	0.9741	20.2725	1.00448	415.712	330.932	6.64	0	6.00336	2688.3	4.72433	4.48225	1	nan	nan
05/04/2018 00:30	nan	-116.112	-68.5358	12.535	-1.07022	0	33.2411	0.561653	0.998502	20.2995	1.01067	415.425	330.758	6.71	0	6.06665	2684.25	4.81804	4.58071	1	nan	nan
05/04/2018 00:40	0.493652	-116.017	-68.5331	12.656	-0.861899	0	33.2405	0.598467	1.01261	20.3229	1.03887	415.269	330.652	6.66	0	6.02145	2681.91	4.75564	4.51466	1	0.563431	0.534881
05/04/2018 00:50	nan	-115.922	-68.5296	12.691	-0.374608	0	33.1996	0.650597	1.00956	20.3489	1.02981	415.858	331.209	6.68	0	6.03953	2682.41	4.78094	4.54139	1	nan	nan
05/04/2018 01:00	nan	-115.826	-68.5261	12.702	0.132694	0	33.1336	0.682819	1.05459	20.3753	1.0642	417.1	332.37	6.76	0	6.11186	2674.96	4.89141	4.65729	1	nan	nan
05/04/2018 01:10	nan	-115.73	-68.5225	12.784	0.264606	0	33.115	0.702338	1.08614	20.4014	1.10863	417.186	332.509	7.07	0	6.39214	2669.75	5.30926	5.0992	1	nan	nan
05/04/2018 01:20	nan	-115.635	-68.5187	12.605	1.07591	0	33.1223	0.703412	1.10448	20.4224	1.12475	416.937	332.304	7.07	0	6.39214	2666.73	5.31227	5.10209	1	nan	nan
05/04/2018 01:30	nan	-115.541	-68.5162	12.567	1.63202	0	33.1326	0.727177	1.07285	20.4447	1.09794	417.114	332.405	7.02	0	6.34693	2671.94	5.23936	5.02527	1	nan	nan
05/04/2018 01:40	0.897412	-115.445	-68.5149	12.816	1.18647	0	33.0979	0.750163	1.13153	20.4648	1.14638	416.599	332.103	6.75	0	6.10282	2662.28	4.88998	4.65457	1	1.0532	1.0025
05/04/2018 01:50	nan	-115.349	-68.5113	12.783	0.904335	0	33.0897	0.773432	1.14703	20.4843	1.16879	416.765	332.268	6.82	0	6.16611	2659.73	4.9842	4.75389	1	nan	nan
05/04/2018 02:00	nan	-115.253	-68.5077	12.926	-0.116465	0	33.0784	0.749169	1.18346	20.507	1.20473	416.926	332.445	7.15	0	6.46447	2653.76	5.43485	5.23095	1	nan	nan
05/04/2018 02:10	8.59404	-115.157	-68.5053	12.856	0.00781052	0	33.1011	0.765743	1.14582	20.5259	1.19754	416.956	332.413	7.25	0	6.55488	2659.93	5.56695	5.37205	1	11.4822	11.0802
05/04/2018 02:20	nan	-115.06	-68.5021	12.879	0.737276	0	33.0839	0.739048	1.15037	20.5393	1.17398	416.794	332.308	7.47	0	6.75378	2659.18	5.87834	5.70382	1	nan	nan
05/04/2018 02:30	nan	-114.963	-68.4986	12.913	-0.307123	0	33.0883	0.657967	1.14789	20.505	1.19955	417.06	332.526	7.68	0	6.94365	2659.59	6.18215	6.02857	1	nan	nan
05/04/2018 02:40	4.94492	-114.865	-68.4953	13.045	-1.14814	0	33.0973	0.568522	1.10248	20.4161	1.15412	417.165	332.561	7.33	0	6.62721	2667.06	5.67132	5.48391	1	6.73061	6.5082
05/04/2018 02:50	nan	-114.767	-68.4921	12.849	0.486621	0	33.1006	0.439232	1.09221	20.3004	1.14382	417.051	332.456	7.21	0	6.51871	2668.75	5.50226	5.30415	1	nan	nan
05/04/2018 03:00	nan	-114.671	-68.4893	12.86	-0.0106161	0	33.1439	0.36402	1.02002	20.1701	1.09832	416.684	332.036	6.8	0	6.14802	2680.68	4.93845	4.70754	1	nan	nan
05/04/2018 03:10	1.66934	-114.575	-68.4859	12.927	0.514423	0	33.1419	0.291735	0.987707	20.0376	1.04108	416.518	331.873	6.94	0	6.2746	2686.04	5.11843	4.89848	1	2.05066	1.96254
05/04/2018 03:20	nan	-114.479	-68.483	12.647	0.0882177	0	33.1709	0.272347	0.957733	19.9023	1.02251	416.836	332.048	6.86	0	6.20227	2691.02	5.00772	4.78177	1	nan	nan
05/04/2018 03:30	nan	-114.385	-68.4802	12.534	0.292734	0	33.1935	0.237027	0.988972	19.7669	1.02931	415.652	331.058	6.32	0	5.71405	2685.83	4.32526	4.0625	1	nan	nan
05/04/2018 03:40	4.02656	-114.291	-68.477	12.484	-0.400112	0	33.1987	0.221397	0.979223	19.6276	1.03874	415.708	331.097	6.25	0	5.65076	2687.45	4.23855	3.97181	1	4.09603	3.83826
05/04/2018 03:50	0.470082	-114.197	-68.4737	12.584	1.77011	0	33.2032	0.265437	0.980588	19.5419	1.0269	416.165	331.443	6.28	0	5.67788	2687.22	4.27523	4.0102	1	0.48233	0.45243
05/04/2018 04:00	nan	-114.102	-68.4708	12.497	-1.74679	0	33.2381	0.35298	1.00097	19.5379	1.04901	414.403	329.974	5.88	0	5.31623	2683.84	3.80363	3.51784	1	nan	nan
05/04/2018 04:10	0.993406	-114.009	-68.468	12.333	-0.350346	0	33.2676	0.453438	0.998267	19.5685	1.05042	414.106	329.672	5.81	0	5.25294	2684.29	3.72315	3.43429	1	0.887663	0.818794
05/04/2018 04:20	2.54805	-113.916	-68.4653	12.515	-0.696651	0	33.2491	0.51869	1.02014	19.6098	1.05242	412.948	328.793	5.74	0	5.18966	2680.66	3.64628	3.3543	1	2.22981	2.05126
05/04/2018 04:30	4.19622	-113.822	-68.4617	12.557	-0.23508	0	33.2421	0.534623	1.0486	19.6542	1.09634	413.289	329.108	6.25	0	5.65076	2675.95	4.24765	3.98034	1	4.27777	4.00857
05/04/2018 04:40	nan	-113.728	-68.4585	12.425	-1.87076	0	33.2928	0.54651	1.00752	19.6988	1.07311	413.275	328.968	6.32	0	5.71405	2682.75	4.32774	4.06483	1	nan	nan
05/04/2018 04:50	nan	-113.634	-68.4554	12.523	-1.2922	0	33.3007	0.569477	0.972332	19.7408	1.02868	413.203	328.866	6.34	0	5.73213	2688.59	4.34758	4.08616	1	nan	nan
05/04/2018 05:00	nan	-113.539	-68.4519	12.691	-0.0306286	0	33.2885	0.587205	0.984605	19.7808	1.03126	412.921	328.67	6.37	0	5.75925	2686.55	4.3862	4.12648	1	nan	nan
05/04/2018 05:10	nan	-113.444	-68.4473	12.753	-0.232265	0	33.2634	0.594227	1.00494	19.8196	1.04877	412.997	328.798	6.5	0	5.87679	2683.18	4.55104	4.29933	1	nan	nan
05/04/2018 05:20	nan	-113.35	-68.4426	12.476	-1.86686	0	33.2594	0.581452	0.996932	19.8576	1.04494	414.021	329.619	6.83	0	6.17515	2684.51	4.97428	4.74578	1	nan	nan
05/04/2018 05:30	nan	-113.256	-68.4373	12.736	0.16402	0	33.2683	0.581678	0.985982	19.8937	1.03933	413.685	329.328	6.46	0	5.84062	2686.32	4.49823	4.24409	1	nan	nan
05/04/2018 05:40	nan	-113.161	-68.4321	12.73	-0.127501	0	33.2857	0.587845	0.981575	19.9277	1.03042	413.348	329.015	6.45	0	5.83158	2687.06	4.48512	4.23039	1	nan	nan
05/04/2018 05:50	nan	-113.066	-68.427	12.813	-2.21169	0	33.3171	0.587182	0.987955	19.9606	1.03286	412.275	328.092	6.97	0	6.30172	2686	5.15853	4.94096	1	nan	nan
05/04/2018 06:00	0.790521	-112.971	-68.4216	12.746	-1.0089	0	33.315	0.573505	0.987829	19.9963	1.03988	411.872	327.781	6.97	0	6.30172	2686.02	5.15851	4.94094	1	0.978698	0.937421
05/04/2018 06:10	0.827893	-112.877	-68.4159	12.771	-1.8827	0	33.3109	0.558652	0.962993	20.029	1.01862	412.175	328.018	7.02	0	6.34693	2690.15	5.22161	5.00824	1	1.0375	0.995109
05/04/2018 06:20	nan	-112.782	-68.4104	12.923	-1.72481	0	33.3288	0.53904	0.952295	20.0612	1.01278	412.106	327.919	6.8	0	6.14802	2691.92	4.92813	4.6977	1	nan	nan
05/04/2018 06:30	nan	-112.687	-68.4052	12.924	0.480876	0	33.3551	0.567773	0.918625	20.0945	0.968473	410.394	326.47	6.64	0	6.00336	2697.54	4.71624	4.47457	1	nan	nan
05/04/2018 06:40	1.18079	-112.591	-68.3997	13.057	-2.39492	0	33.3298	0.556348	0.970187	20.1271	1.00034	409.977	326.215	6.63	0	5.99432	2688.95	4.71096	4.46822	1	1.33504	1.26624
05/04/2018 06:50	nan	-112.492	-68.3945	13.201	-3.10743	0	33.3382	0.525245	0.967437	20.1513	1.02514	410.807	326.872	6.34	0	5.73213	2689.41	4.34693	4.08554	1	nan	nan
05/04/2018 07:00	nan	-112.394	-68.3895	13.305	-2.35784	0	33.3603	0.505105	0.926541	20.1722	0.984729	409.817	326.01	6.59	0	5.95816	2696.22	4.65366	4.40852	1	nan	nan
05/04/2018 07:10	nan	-112.295	-68.3845	13.118	-0.576635	0	33.3609	0.4931	0.91973	20.1883	0.967098	409.43	325.689	6.41	0	5.79542	2697.35	4.42685	4.1701	1	nan	nan
05/04/2018 07:20	2.80502	-112.198	-68.3781	13.219	-2.37237	0	33.3614	0.496018	0.929055	20.2023	0.979581	409.002	325.356	6.61	0	5.97624	2695.8	4.67947	4.43566	1	3.15024	2.98611
05/04/2018 07:30	0.415797	-112.102	-68.3706	13.185	-3.14701	0	33.3561	0.493927	0.938122	20.2173	0.980476	409.542	325.797	6.71	0	6.06665	2694.29	4.80905	4.57217	1	0.479902	0.456262
05/04/2018 07:40	0.923963	-112.006	-68.3635	12.969	-3.14319	0	33.357	0.486307	0.946275	20.2284	0.994021	409.813	326.019	6.77	0	6.1209	2692.93	4.88807	4.65547	1	1.08394	1.03236
05/04/2018 07:50	nan	-111.91	-68.3568	12.869	-1.90043	0	33.363	0.503175	0.94104	20.2381	0.98545	409.027	325.375	6.48	0	5.8587	2693.8	4.51699	4.26448	1	nan	nan
05/04/2018 08:00	5.33399	-111.814	-68.3504	13.094	-1.90462	0	33.3845	0.513305	0.968254	20.2477	1.00432	408.257	324.727	6.08	0	5.49706	2689.27	4.03327	3.75741	1	5.16321	4.81008
05/04/2018 08:10	nan	-111.716	-68.3471	13.146	-2.26198	0	33.4089	0.541782	0.978205	20.2547	1.01864	406.642	323.397	5.96	0	5.38856	2687.62	3.89356	3.61167	1	nan	nan
05/04/2018 08:20	1.8027	-111.618	-68.3444	12.98	-3.38165	0	33.4045	0.569393	1.01629	20.2663	1.0481	406.689	323.462	5.65	0	5.10828	2681.3	3.54503	3.24955	1	1.53375	1.40591
05/04/2018 08:30	nan	-111.522	-68.3417	12.883	-1.9996	0	33.4097	0.590027	1.04475	20.2772	1.08572	406.929	323.664	5.73	0	5.18061	2676.59	3.63777	3.34516	1	nan	nan
05/04/2018 08:40	3.07191	-111.426	-68.3391	12.852	-3.15583	0	33.4222	0.621472	1.06182	20.2872	1.09457	406.677	323.442	5.78	0	5.22582	2673.76	3.6963	3.4056	1	2.72512	2.5108
05/04/2018 08:50	2.44203	-111.33	-68.3359	12.876	-2.78559	0	33.436	0.625773	1.10945	20.2982	1.14206	404.06	321.359	5.67	0	5.12637	2665.91	3.57759	3.28203	1	2.09678	1.92356
05/04/2018 09:00	nan	-111.235	-68.3329	12.8	-3.16134	0	33.4303	0.610025	1.11771	20.307	1.16653	404.721	321.913	6.15	0	5.56034	2664.55	4.13565	3.86222	1	nan	nan
05/04/2018 09:10	7.37393	-111.139	-68.3315	12.826	-3.03045	0	33.4184	0.628538	1.08486	20.3163	1.13616	405.44	322.492	6.24	0	5.64172	2669.96	4.24023	3.97206	1	7.50412	7.02952
05/04/2018 09:20	7.07009	-111.044	-68.3333	12.844	-2.71334	0	33.412	0.648337	1.09746	20.3269	1.12513	406.582	323.408	5.92	0	5.3524	2667.88	3.86132	3.5765	1	6.55197	6.06869
05/04/2018 09:30	nan	-110.947	-68.3352	12.929	-2.17015	0	33.3956	0.650578	1.13748	20.3368	1.17477	406.281	323.235	5.45	0	4.92746	2661.3	3.33844	3.0349	1	nan	nan
05/04/2018 09:40	nan	-110.851	-68.3368	12.977	-2.18736	0	33.4118	0.681687	1.11959	20.3473	1.16782	406.178	323.113	5.2	0	4.70143	2664.24	3.07159	2.76133	1	nan	nan
05/04/2018 09:50	2.15554	-110.754	-68.3378	12.975	-3.62657	0	33.4344	0.698728	1.1657	20.3562	1.18846	403.951	321.304	5.02	0	4.53869	2656.67	2.89157	2.57714	1	1.49589	1.33323
05/04/2018 10:00	nan	-110.657	-68.3383	12.95	-3.49592	0	33.4291	0.700654	1.18398	20.3651	1.22152	404.019	321.39	5.02	0	4.53869	2653.67	2.8932	2.57859	1	nan	nan
05/04/2018 10:10	nan	-110.561	-68.3389	12.867	-3.86587	0	33.4282	0.719152	1.18616	20.3728	1.23047	404.386	321.69	5.01	0	4.52965	2653.31	2.8833	2.5685	1	nan	nan
05/04/2018 10:20	nan	-110.464	-68.3396	12.848	-3.87196	0	33.4412	0.724947	1.1983	20.3808	1.23155	403.313	320.808	4.91	0	4.43923	2651.33	2.78443	2.46792	1	nan	nan
05/04/2018 10:30	0.503626	-110.368	-68.3401	12.851	-3.22596	0	33.4247	0.716267	1.20686	20.391	1.24562	402.953	320.566	4.94	0	4.46636	2649.93	2.81498	2.49883	1	0.340247	0.302034
05/04/2018 10:40	3.04478	-110.271	-68.3383	12.904	-3.27232	0	33.4151	0.719313	1.19306	20.4027	1.23627	403.327	320.879	4.97	0	4.49348	2652.18	2.84373	2.52819	1	2.07805	1.84747
05/04/2018 10:50	0.376214	-110.175	-68.3357	13.054	-4.38	0	33.4117	0.70973	1.1925	20.4118	1.23266	403.496	321.019	5.12	0	4.6291	2652.28	2.9958	2.68305	1	0.270495	0.242257
05/04/2018 11:00	nan	-110.078	-68.3332	12.95	-3.38763	0	33.4117	0.686517	1.1832	20.4215	1.22493	403.637	321.127	5.2	0	4.70143	2653.8	3.07763	2.76676	1	nan	nan
05/04/2018 11:10	2.32543	-109.981	-68.3307	12.98	-3.33778	0	33.4016	0.668083	1.14589	20.4297	1.20069	404.437	321.771	5.18	0	4.68335	2659.92	3.05334	2.74236	1	1.70407	1.53052
05/04/2018 11:20	2.23524	-109.884	-68.328	12.997	-3.45477	0	33.3852	0.67504	1.11928	20.4395	1.1691	406.488	323.419	5.27	0	4.76472	2664.29	3.14468	2.83615	1	1.68699	1.52148
05/04/2018 11:30	nan	-109.788	-68.3257	12.99	-3.81992	0	33.3739	0.716658	1.12675	20.4485	1.157	407.52	324.258	5.18	0	4.68335	2663.06	3.05153	2.74074	1	nan	nan
05/04/2018 11:40	nan	-109.691	-68.3233	12.898	-2.92578	0	33.3577	0.72578	1.18497	20.4574	1.20458	406.843	323.785	4.86	0	4.39403	2653.51	2.73397	2.41691	1	nan	nan
05/04/2018 11:50	nan	-109.595	-68.3204	12.816	-2.95983	0	33.3476	0.715338	1.20585	20.4589	1.24551	406.732	323.744	4.94	0	4.46636	2650.09	2.81489	2.49875	1	nan	nan
05/04/2018 12:00	1.32542	-109.499	-68.3177	12.755	-3.40873	0	33.3274	0.704286	1.19326	20.4495	1.23434	407.939	324.743	5.13	0	4.63814	2652.15	3.00615	2.69361	1	0.956261	0.856842
05/04/2018 12:10	nan	-109.404	-68.3154	12.746	-3.85842	0	33.3491	0.711692	1.18835	20.4413	1.22351	408.297	324.972	5.19	0	4.69239	2652.96	3.06772	2.75657	1	nan	nan
05/04/2018 12:20	nan	-109.308	-68.3136	13.029	-4.15732	0	33.3613	0.731623	1.20504	20.4326	1.23736	406.492	323.517	5.05	0	4.56581	2650.22	2.92546	2.6112	1	nan	nan
05/04/2018 12:30	nan	-109.21	-68.3119	12.828	-2.2801	0	33.3511	0.729517	1.22384	20.4236	1.25334	407.136	324.063	5.13	0	4.63814	2647.15	3.00899	2.69615	1	nan	nan
05/04/2018 12:40	0.235414	-109.114	-68.3104	12.844	-1.82493	0	33.3181	0.726468	1.23594	20.4168	1.27588	408.521	325.252	5.23	0	4.72855	2645.17	3.11399	2.80334	1	0.175938	0.158386
05/04/2018 12:50	nan	-109.019	-68.3086	12.829	-1.84203	0	33.2875	0.718518	1.21461	20.4109	1.25739	408.567	325.345	5	0	4.52061	2648.66	2.87576	2.56051	1	nan	nan
05/04/2018 13:00	5.99654	-108.923	-68.3067	12.984	-3.07529	0	33.2702	0.721569	1.20854	20.4079	1.25013	409.576	326.184	5.11	0	4.62006	2649.65	2.98701	2.67391	1	4.29882	3.84821
05/04/2018 13:10	nan	-108.826	-68.3045	12.863	-4.25696	0	33.2704	0.71254	1.21385	20.4064	1.24813	409.786	326.349	5.46	0	4.9365	2648.78	3.35718	3.05324	1	nan	nan
05/04/2018 13:20	nan	-108.73	-68.3024	12.802	-2.7459	0	33.2739	0.682517	1.20788	20.4044	1.2472	409.524	326.132	5.22	0	4.71951	2649.76	3.10084	2.79021	1	nan	nan
05/04/2018 13:30	1.30546	-108.634	-68.3003	12.998	-2.50319	0	33.2834	0.697572	1.15474	20.406	1.2063	410.5	326.863	5.22	0	4.71951	2658.47	3.09575	2.78564	1	0.969935	0.872772
05/04/2018 13:40	1.8895	-108.537	-68.2978	13.068	-3.35432	0	33.2692	0.726512	1.17169	20.4103	1.19983	411.16	327.416	5.34	0	4.82801	2655.68	3.22385	2.91671	1	1.46195	1.32267
05/04/2018 13:50	nan	-108.441	-68.2931	12.823	-3.51419	0	33.2556	0.677288	1.22183	20.415	1.24303	410.442	326.902	5.58	0	5.045	2647.48	3.48966	3.18971	1	nan	nan
05/04/2018 14:00	4.64223	-108.348	-68.2889	12.65	-1.47479	0	33.3028	0.657576	1.14648	20.4288	1.22294	409.883	326.338	5.34	0	4.82801	2659.82	3.22134	2.91444	1	3.58901	3.24708
05/04/2018 14:10	nan	-108.252	-68.2868	13.008	-3.49664	0	33.3375	0.657013	1.08341	20.4438	1.13054	408.896	325.418	5.12	0	4.6291	2670.2	2.98573	2.67403	1	nan	nan
05/04/2018 14:20	0.955956	-108.156	-68.2847	12.855	-6.13042	0	33.3349	0.672582	1.08038	20.4619	1.12026	408.72	325.277	5.3	0	4.79184	2670.7	3.17246	2.86509	1	0.727856	0.657336
05/04/2018 14:30	0.468869	-108.061	-68.2818	12.81	-2.28329	0	33.3327	0.679037	1.0922	20.4786	1.12205	408.265	324.921	4.87	0	4.40307	2668.75	2.73595	2.41993	1	0.307873	0.272311
05/04/2018 14:40	nan	-107.965	-68.2779	12.84	-3.00357	0	33.3284	0.686875	1.09595	20.4942	1.13517	408.333	324.993	4.66	0	4.2132	2668.13	2.53406	2.21599	1	nan	nan
05/04/2018 14:50	0.0200574	-107.869	-68.2745	12.789	-5.97754	0	33.3277	0.694033	1.09348	20.5106	1.12894	408.743	325.317	4.86	0	4.39403	2668.54	2.72626	2.4101	1	0.0131236	0.0116017
05/04/2018 15:00	nan	-107.773	-68.2717	13.137	-2.71023	0	33.3301	0.728476	1.0799	20.5309	1.1196	408.624	325.211	4.88	0	4.41211	2670.78	2.74472	2.42895	1	nan	nan
05/04/2018 15:10	0.692777	-107.676	-68.2675	13.016	-2.98069	0	33.295	0.710412	1.14238	20.5526	1.17139	409.033	325.647	5.18	0	4.68335	2660.49	3.053	2.74206	1	0.507612	0.455913
05/04/2018 15:20	2.80885	-107.58	-68.2628	12.982	-4.80865	0	33.3247	0.759685	1.10129	20.5743	1.1593	408.615	325.24	4.92	0	4.44828	2667.25	2.78599	2.47057	1	1.8781	1.66547
05/04/2018 15:30	5.88279	-107.483	-68.2582	13.252	-2.69567	0	33.2849	0.761107	1.15958	20.6007	1.19706	409.469	326.033	4.68	0	4.23129	2657.67	2.55801	2.23944	1	3.61158	3.1618
05/04/2018 15:40	3.60878	-107.386	-68.2542	12.875	-1.44831	0	33.2971	0.737598	1.17797	20.6214	1.25535	410.041	326.496	5.04	0	4.55677	2654.65	2.91288	2.5987	1	2.52287	2.25075
05/04/2018 15:50	nan	-107.311	-68.2509	4.944	-4.51402	0	33.3348	0.701243	1.13503	20.6294	1.20503	407.227	324.141	4.84	0	4.37595	2661.7	2.71018	2.39337	1	nan	nan
05/04/2018 16:00	0.853732	-107.304	-68.2503	0.351	-1.67786	0	33.3085	0.695531	0.941858	20.6272	1.14208	408.623	325.272	2.86	0	2.58579	2693.66	1.10694	0.830729	1	0.226808	0.170213
05/04/2018 16:10	8.2679	-107.304	-68.2503	0.333	-1.72819	0	33.3213	0.667742	1.03984	20.6148	0.979914	407.963	324.619	5.15	0	4.65622	2677.4	3.01245	2.70182	1	5.9776	5.36122
05/04/2018 16:20	nan	-107.304	-68.2503	0.279	-2.46003	0	33.3149	0.655152	1.10907	20.592	1.1644	407.324	324.237	5.26	0	4.75568	2665.97	3.13319	2.82451	1	nan	nan
05/04/2018 16:30	nan	-107.304	-68.2503	0.367	-1.91944	0	33.3121	0.640775	1.13367	20.563	1.191	408.035	324.827	5.08	0	4.59294	2661.92	2.94949	2.6365	1	nan	nan
05/04/2018 16:40	0.889559	-107.297	-68.25	4.773	-2.39462	0	33.3074	0.626877	1.13789	20.5318	1.19088	408.378	325.11	5.01	0	4.52965	2661.23	2.87901	2.56468	1	0.614652	0.547544
05/04/2018 16:50	3.79173	-107.221	-68.248	13.079	-1.25055	0	33.3071	0.606393	1.12984	20.5035	1.18457	408.777	325.424	2.3	0	2.07948	2662.56	0.784429	0.540387	1	0.713841	0.49176
05/04/2018 17:00	nan	-107.124	-68.2448	13.025	-0.719127	0	33.2949	0.581642	1.14434	20.4737	1.19911	409.043	325.672	5.47	0	4.94554	2660.17	3.36083	3.05787	1	nan	nan
05/04/2018 17:10	1.49542	-107.028	-68.2416	12.881	-2.53892	0	33.3464	0.548358	1.10936	20.4443	1.16413	407.52	324.324	5.71	0	5.16253	2665.93	3.62248	3.32849	1	1.30012	1.1946
05/04/2018 17:20	nan	-106.932	-68.2387	12.902	-1.63904	0	33.3298	0.54192	1.08409	20.4132	1.15042	407.965	324.707	5.93	0	5.36144	2670.09	3.87135	3.58712	1	nan	nan
05/04/2018 17:30	nan	-106.836	-68.2352	12.828	-1.85859	0	33.3307	0.546053	1.0759	20.3792	1.12165	409.804	326.15	6.39	0	5.77733	2671.44	4.42339	4.16417	1	nan	nan
05/04/2018 17:40	nan	-106.741	-68.2322	12.93	-2.09187	0	33.3033	0.57268	1.08284	20.3465	1.12757	410.891	327.08	6.2	0	5.60555	2670.29	4.19146	3.92105	1	nan	nan
05/04/2018 17:50	nan	-106.646	-68.2295	12.816	-1.76025	0	33.2825	0.627192	1.14111	20.3147	1.17793	411.661	327.771	5.89	0	5.32527	2660.7	3.83171	3.54512	1	nan	nan
05/04/2018 18:00	14.5264	-106.55	-68.227	12.818	-2.38769	0	33.2691	0.689286	1.18117	20.2846	1.20335	411.169	327.426	6.16	0	5.56939	2654.13	4.15582	3.88239	1	14.4886	13.5353
05/04/2018 18:10	4.84834	-106.454	-68.2233	12.877	-1.1723	0	33.2389	0.715107	1.29419	20.2551	1.31877	411.047	327.467	6.3	0	5.69596	2635.69	4.34148	4.07505	1	5.05175	4.74174
05/04/2018 18:20	0.310182	-106.359	-68.2195	12.827	-1.70722	0	33.2355	0.790633	1.31325	20.2181	1.35534	411.268	327.674	6.17	0	5.57843	2632.59	4.1849	3.91091	1	0.311539	0.291142
05/04/2018 18:30	5.64164	-106.264	-68.2161	12.823	-2.37743	0	33.2354	0.855478	1.39523	20.1798	1.40849	410.286	326.925	6.14	0	5.5513	2619.32	4.1591	3.88277	1	5.63139	5.25724
05/04/2018 18:40	6.79603	-106.169	-68.2132	12.825	-3.09212	0	33.2161	0.904987	1.49422	20.1406	1.51885	409.159	326.137	6.09	0	5.5061	2603.39	4.1113	3.83145	1	6.70572	6.24928
05/04/2018 18:50	0.870651	-106.074	-68.2103	12.952	-0.681614	0	33.2077	0.939502	1.54217	20.0998	1.57445	409.621	326.558	5.87	0	5.30719	2595.72	3.85596	3.56489	1	0.805727	0.744906
05/04/2018 19:00	5.60803	-105.978	-68.207	12.961	-1.51713	0	33.2137	0.954881	1.57951	20.0542	1.61616	409.103	326.158	5.8	0	5.2439	2589.76	3.7789	3.48438	1	5.08612	4.68972
05/04/2018 19:10	0.0242956	-105.883	-68.2035	12.877	-2.43674	0	33.241	0.964438	1.59439	20.0113	1.64376	408.07	325.29	5.64	0	5.09924	2587.39	3.59748	3.2963	1	0.0209767	0.0192205
05/04/2018 19:20	0.854802	-105.789	-68.2002	12.792	-0.520131	0	33.2487	0.963722	1.59848	19.9679	1.64249	407.644	324.933	5.34	0	4.82801	2586.74	3.26654	2.95533	1	0.670138	0.606293
05/04/2018 19:30	8.91226	-105.694	-68.1976	12.939	-0.755705	0	33.2476	0.967277	1.60596	19.9262	1.6573	407.462	324.799	5.27	0	4.76472	2585.55	3.19221	2.87902	1	6.82795	6.15805
05/04/2018 19:40	nan	-105.599	-68.1955	12.78	-1.36672	0	33.2494	0.967142	1.59758	19.8867	1.64541	407.589	324.889	5.53	0	4.99979	2586.88	3.47449	3.16928	1	nan	nan
05/04/2018 19:50	nan	-105.503	-68.1927	12.888	-2.63998	0	33.2503	0.949225	1.61292	19.8474	1.66454	407.345	324.705	5.75	0	5.1987	2584.44	3.72503	3.42808	1	nan	nan
05/04/2018 20:00	nan	-105.406	-68.1894	13.194	-1.74899	0	33.2476	0.961195	1.58091	19.8095	1.63863	407.767	325.031	6.19	0	5.59651	2589.53	4.24404	3.96889	1	nan	nan
05/04/2018 20:10	2.49187	-105.309	-68.186	13.008	-1.92907	0	33.2494	0.976887	1.70819	19.7707	1.68156	407.82	325.095	6.45	0	5.83158	2569.34	4.58672	4.32621	1	2.74308	2.58728
05/04/2018 20:20	1.70425	-105.213	-68.1823	12.912	-3.04674	0	33.2584	0.97604	1.88143	19.7304	1.9051	407.301	324.798	6.9	0	6.23844	2542.13	5.20665	4.97735	1	2.12963	2.03584
05/04/2018 20:30	2.76355	-105.117	-68.1787	12.999	-0.654516	0	33.2415	0.974217	1.88895	19.6907	1.9268	407.392	324.921	7	0	6.32885	2540.96	5.34506	5.12385	1	3.54512	3.3984
05/04/2018 20:40	1.56298	-105.021	-68.175	13.045	-2.31993	0	33.232	0.956772	1.89743	19.6534	1.94222	407.958	325.403	7.37	0	6.66337	2539.64	5.86957	5.68131	1	2.20177	2.13115
05/04/2018 20:50	5.0497	-104.925	-68.1719	13.009	-1.47607	0	33.2372	0.937632	1.88074	19.6138	1.93595	408.044	325.456	7.37	0	6.66337	2542.24	5.86657	5.6784	1	7.10986	6.88181
05/04/2018 21:00	nan	-104.828	-68.1694	13.079	-1.43067	0	33.2382	0.918115	1.85938	19.5728	1.91648	407.847	325.285	7.38	0	6.67241	2545.58	5.87718	5.69008	1	nan	nan
05/04/2018 21:10	nan	-104.731	-68.1671	13.11	nan	0	33.2367	0.906333	1.84176	19.5338	1.8957	407.929	325.341	7.71	0	6.97077	2548.33	6.3607	6.20697	1	nan	nan
05/04/2018 21:20	nan	-104.633	-68.1645	13.11	nan	0	33.2343	0.899033	1.82838	19.4937	1.87883	408.162	325.522	7.77	0	7.02502	2550.43	6.4486	6.30136	1	nan	nan
05/04/2018 21:30	nan	-104.536	-68.1611	13.205	nan	0	33.2302	0.889443	1.83503	19.4556	1.8872	408.121	325.504	7.71	0	6.97077	2549.39	6.35938	6.20569	1	nan	nan
05/04/2018 21:40	nan	-104.438	-68.158	13.231	nan	0	33.2264	0.931408	1.82063	19.416	1.86972	408.244	325.599	7.42	0	6.70858	2551.64	5.92812	5.74509	1	nan	nan
05/04/2018 21:50	nan	-104.34	-68.1547	13.228	nan	0	33.2328	0.91643	1.88036	19.3759	1.90179	407.803	325.253	7.62	0	6.8894	2542.3	6.23344	6.0701	1	nan	nan
05/04/2018 22:00	nan	-104.242	-68.151	13.192	nan	0	33.2298	0.859714	1.79771	19.334	1.95605	407.161	324.781	7.8	0	7.05214	2555.24	6.48797	6.34413	1	nan	nan
05/04/2018 22:10	nan	-104.144	-68.1471	13.361	nan	0	33.2208	0.84908	1.4928	19.2911	1.57446	409.181	326.178	8.15	0	7.36859	2603.62	6.96432	6.8616	1	nan	nan
05/04/2018 22:20	nan	-104.046	-68.1433	13.242	nan	0	33.2172	0.910837	1.47514	19.2457	1.52673	409.902	326.732	8.24	0	7.44996	2606.45	7.10196	7.01017	1	nan	nan
05/04/2018 22:30	nan	-103.948	-68.1404	13.324	nan	0	33.2151	0.935602	1.58405	19.2024	1.60509	408.567	325.721	8.27	0	7.47708	2589.03	7.17343	7.08502	1	nan	nan
05/04/2018 22:40	nan	-103.85	-68.1384	13.063	nan	0	33.2135	0.973163	1.61584	19.1615	1.6666	407.956	325.275	8.38	0	7.57653	2583.97	7.35657	7.28187	1	nan	nan
05/04/2018 22:50	nan	-103.753	-68.1354	13.157	nan	0	33.2145	0.991158	1.65837	19.1217	1.70018	407.245	324.725	8.26	0	7.46804	2577.22	7.17393	7.08407	1	nan	nan
05/04/2018 23:00	nan	-103.655	-68.1316	13.212	nan	0	33.2142	0.998866	1.68	19.0839	1.73775	406.713	324.325	8.28	0	7.48612	2573.8	7.21059	7.12316	1	nan	nan
05/04/2018 23:10	nan	-103.558	-68.1282	13.096	nan	0	33.2161	0.978937	1.68238	19.0486	1.74294	406.745	324.35	8.42	0	7.6127	2573.42	7.43634	7.36661	1	nan	nan
05/04/2018 23:20	nan	-103.461	-68.125	13.167	-0.404019	0	33.2282	0.989457	1.65275	19.0161	1.72746	406.561	324.166	8.54	0	7.72119	2578.11	7.62517	7.57118	1	nan	nan
05/04/2018 23:30	14.3024	-103.364	-68.122	13.074	-2.34682	0	33.2369	1.00512	1.65265	18.9896	1.69913	406.261	323.891	8.53	0	7.71215	2578.13	7.60875	7.55344	1	26.1176	25.9277
05/04/2018 23:40	4.28826	-103.267	-68.1189	12.915	-1.3416	0	33.2417	1.01189	1.68226	18.97	1.73456	405.545	323.331	8.4	0	7.59462	2573.44	7.40393	7.33163	1	7.61999	7.54559
05/04/2018 23:50	3.9945	-103.171	-68.1157	12.941	-2.17981	0	33.2438	0.987855	1.68186	18.9577	1.74853	405.218	323.074	8.31	0	7.51325	2573.5	7.25897	7.17528	1	6.95903	6.87879
06/04/2018 00:00	4.06392	-103.074	-68.1123	13.07	-2.55748	0	33.2383	0.969064	1.63487	18.9432	1.71041	406.506	324.09	8.39	0	7.58558	2580.95	7.377	7.30353	1	7.19509	7.12344
06/04/2018 00:10	6.82188	-102.978	-68.1089	13.14	-0.742963	0	33.2404	0.95627	1.60728	18.9253	1.67422	407.234	324.644	8.41	0	7.60366	2585.34	7.40302	7.33217	1	12.1206	12.0046
06/04/2018 00:20	6.42428	-102.881	-68.1059	13.067	-2.27472	0	33.241	0.940287	1.60167	18.9022	1.66733	407.173	324.589	8.31	0	7.51325	2586.23	7.24109	7.1576	1	11.1645	11.0358
06/04/2018 00:30	1.69361	-102.784	-68.1029	13.063	-2.44488	0	33.2423	0.931355	1.58427	18.8789	1.65324	407.256	324.644	8.48	0	7.66695	2589	7.51121	7.44946	1	3.05306	3.02796
06/04/2018 00:40	1.63723	-102.688	-68.0997	13.061	-1.28001	0	33.2451	0.921877	1.58451	18.8522	1.64416	407.196	324.584	8.67	0	7.83873	2588.96	7.82347	7.78707	1	3.07411	3.05981
06/04/2018 00:50	4.9802	-102.593	-68.0966	12.973	-3.34272	0	33.2427	0.900277	1.57889	18.8227	1.64345	407.131	324.537	8.74	0	7.90202	2589.86	7.93871	7.91196	1	9.48872	9.45675
06/04/2018 01:00	3.52732	-102.497	-68.0934	13.003	-2.53678	0	33.2383	0.885151	1.55591	18.7898	1.62618	407.338	324.702	9.21	0	8.32696	2593.52	8.73753	8.77957	1	7.39682	7.4324
06/04/2018 01:10	4.79134	-102.403	-68.0903	12.809	-2.65348	0	33.2363	0.87473	1.54236	18.7545	1.59905	407.571	324.876	10.58	0	9.5656	2595.69	11.2977	11.5809	1	12.9915	13.3172
06/04/2018 01:20	10.6427	-102.308	-68.0873	12.72	-3.37502	0	33.2376	0.854157	1.54275	18.7035	1.59364	407.435	324.761	12.05	0	10.8947	2595.62	14.4131	15.0228	1	36.8145	38.3721
06/04/2018 01:30	4.09716	-102.215	-68.0842	12.702	-1.81205	0	33.2321	0.828898	1.53427	18.6362	1.59421	407.288	324.656	12.86	0	11.627	2596.98	16.2865	17.1059	1	16.0148	16.8206
06/04/2018 01:40	nan	-102.122	-68.0809	12.659	-1.68069	0	33.2334	0.815738	1.53538	18.5579	1.5896	407.144	324.536	13.61	0	12.3051	2596.8	18.1273	19.16	1	nan	nan
06/04/2018 01:50	0.233471	-102.029	-68.0781	12.559	-2.40768	0	33.2259	0.795815	1.54665	18.473	1.58857	407.332	324.702	13.88	0	12.5492	2595	18.8203	19.9347	1	1.05456	1.117
06/04/2018 02:00	6.28666	-101.936	-68.0752	12.59	-1.74745	0	33.2238	0.775359	1.56544	18.3875	1.61827	407.383	324.765	14.05	0	12.7029	2592	19.2704	20.4378	1	29.0752	30.8365
06/04/2018 02:10	5.06485	-101.842	-68.0723	12.475	-1.70972	0	33.2234	0.746732	1.54404	18.3083	1.60048	407.625	324.948	14.7	0	13.2906	2595.42	20.9824	22.3578	1	25.5054	27.1774
06/04/2018 02:20	3.03068	-101.749	-68.0691	12.794	-0.797749	0	33.2311	0.731267	1.52144	18.2276	1.57939	407.382	324.725	14.67	0	13.2635	2599.03	20.8866	22.2512	1	15.1921	16.1847
06/04/2018 02:30	6.21927	-101.655	-68.066	12.737	-1.22959	0	33.2346	0.717058	1.51166	18.1432	1.56041	407.308	324.646	14.78	0	13.3629	2600.6	21.1786	22.5793	1	31.6117	33.7025
06/04/2018 02:40	7.92743	-101.562	-68.0631	12.634	-2.86531	0	33.2373	0.699838	1.51355	18.0552	1.56422	407.153	324.519	14.75	0	13.3358	2600.29	21.0983	22.4891	1	40.1412	42.7874
06/04/2018 02:50	6.50076	-101.468	-68.0598	12.667	-1.33821	0	33.2384	0.674897	1.51247	17.9603	1.56442	407.061	324.444	14.65	0	13.2454	2600.47	20.8268	22.1844	1	32.4936	34.6118
06/04/2018 03:00	nan	-101.375	-68.0571	12.698	-0.928744	0	33.2392	0.635832	1.50412	17.848	1.55666	407.068	324.443	14.7	0	13.2906	2601.81	20.9566	22.3304	1	nan	nan
06/04/2018 03:10	1.7493	-101.282	-68.054	12.738	-0.409195	0	33.2431	0.602465	1.50113	17.7243	1.55969	406.989	324.373	14.84	0	13.4172	2602.29	21.3352	22.7557	1	8.95723	9.55356
06/04/2018 03:20	6.07273	-101.188	-68.0505	12.766	-1.19224	0	33.2399	0.578212	1.49829	17.5954	1.56086	407.095	324.465	14.86	0	13.4352	2602.74	21.388	22.815	1	31.1721	33.2519
06/04/2018 03:30	3.20424	-101.094	-68.0477	12.803	-1.95675	0	33.2398	0.558062	1.50047	17.4602	1.56307	407.335	324.658	15.21	0	13.7517	2602.39	22.3571	23.904	1	17.193	18.3826
06/04/2018 03:40	2.11511	-101	-68.0448	12.721	-1.91885	0	33.2438	0.530515	1.51279	17.3189	1.57423	407.26	324.596	14.85	0	13.4262	2600.42	21.3702	22.7945	1	10.8481	11.5711
06/04/2018 03:50	5.21215	-100.905	-68.0414	12.967	-1.83578	0	33.2431	0.508755	1.50411	17.1771	1.57084	406.983	324.374	15.13	0	13.6794	2601.81	22.1365	23.6559	1	27.691	29.5915
06/04/2018 04:00	nan	-100.81	-68.0385	12.929	-1.00106	0	33.2453	0.491264	1.50447	17.0304	1.57046	406.993	324.377	15.08	0	13.6341	2601.75	21.9979	23.5001	1	nan	nan
06/04/2018 04:10	7.69085	-100.716	-68.0354	12.862	-2.19093	0	33.2413	0.478743	1.50782	16.8876	1.57302	407.34	324.665	15.21	0	13.7517	2601.21	22.3622	23.9094	1	41.2762	44.1321
06/04/2018 04:20	nan	-100.621	-68.0318	12.946	-1.61317	0	33.2389	0.470042	1.50945	16.7463	1.57283	407.807	325.042	15.13	0	13.6794	2600.95	22.1402	23.6598	1	nan	nan
06/04/2018 04:30	nan	-100.526	-68.0287	13.006	-1.11243	0	33.241	0.461485	1.51078	16.6067	1.57118	407.468	324.766	14.96	0	13.5257	2600.74	21.6706	23.132	1	nan	nan
06/04/2018 04:40	3.94338	-100.431	-68.0261	12.881	-1.39876	0	33.2438	0.452663	1.51774	16.4676	1.58386	406.956	324.359	15.04	0	13.598	2599.62	21.8961	23.3851	1	20.7227	22.1319
06/04/2018 04:50	nan	-100.337	-68.0233	12.82	-2.26975	0	33.2452	0.452978	1.52227	16.3312	1.58856	406.96	324.362	15.04	0	13.598	2598.9	21.8992	23.3884	1	nan	nan
06/04/2018 05:00	7.27889	-100.242	-68.0204	12.842	-1.77675	0	33.2477	0.445081	1.53494	16.1992	1.59775	406.548	324.034	14.41	0	13.0284	2596.87	20.1981	21.4784	1	35.2848	37.5213
06/04/2018 05:10	9.55331	-100.148	-68.0175	12.821	-2.86567	0	33.2488	0.444963	1.53077	16.0763	1.60462	406.337	323.868	15.06	0	13.6161	2597.54	21.9603	23.4567	1	50.3504	53.7815
06/04/2018 05:20	8.67242	-100.053	-68.0148	12.771	-2.51949	0	33.2513	0.437908	1.53435	15.9543	1.6041	406.29	323.824	15.01	0	13.5709	2596.97	21.8243	23.3038	1	45.4247	48.5041
06/04/2018 05:30	1.26111	-99.9591	-68.012	12.928	-2.17223	0	33.2523	0.437635	1.53519	15.8354	1.60654	406.663	324.121	14.63	0	13.2273	2596.83	20.7874	22.1394	1	6.29164	6.70084
06/04/2018 05:40	9.43453	-99.8645	-68.0092	12.788	-1.13101	0	33.2537	0.446092	1.54334	15.7222	1.6114	406.902	324.311	14.97	0	13.5347	2595.53	21.7199	23.1862	1	49.1802	52.5002
06/04/2018 05:50	9.19358	-99.7701	-68.0072	12.771	-0.501483	0	33.2548	0.438705	1.55676	15.6117	1.62344	406.787	324.224	15.58	0	14.0862	2593.39	23.4439	25.1247	1	51.728	55.4366
06/04/2018 06:00	3.26094	-99.6762	-68.0052	12.807	-1.74904	0	33.2582	0.436332	1.54833	15.5022	1.62732	406.591	324.063	15.19	0	13.7336	2594.73	22.3341	23.8764	1	17.4793	18.6863
06/04/2018 06:10	nan	-99.5819	-68.0035	12.712	-2.62036	0	33.2524	0.43757	1.55107	15.3955	1.61903	406.469	323.973	15.04	0	13.598	2594.29	21.9186	23.4091	1	nan	nan
06/04/2018 06:20	6.33219	-99.4873	-68.0019	12.942	-2.71962	0	33.2403	0.434348	1.56216	15.2887	1.63181	406.702	324.194	14.78	0	13.3629	2592.52	21.2115	22.6145	1	32.2357	34.3678
06/04/2018 06:30	4.27775	-99.3925	-68.0001	12.75	-1.61093	0	33.2222	0.419625	1.56316	15.1801	1.63795	407.544	324.909	14.94	0	13.5076	2592.36	21.6505	23.1074	1	22.2277	23.7235
06/04/2018 06:40	nan	-99.2988	-67.9975	12.781	-2.72675	0	33.244	0.408967	1.55028	15.0707	1.63262	407.182	324.569	15.46	0	13.9777	2594.42	23.0968	24.7342	1	nan	nan
06/04/2018 06:50	4.91026	-99.2057	-67.994	12.686	-0.491416	0	33.2467	0.395135	1.54958	14.9628	1.62424	406.797	324.251	16.04	0	14.5021	2594.53	24.7746	26.6243	1	29.196	31.3757
06/04/2018 07:00	nan	-99.1128	-67.9908	12.757	-1.25917	0	33.2467	0.408422	1.5406	14.8574	1.62365	406.794	324.248	16.27	0	14.7101	2595.97	25.4494	27.3857	1	nan	nan
06/04/2018 07:10	8.10611	-99.0201	-67.9877	12.589	-2.7227	0	33.2257	0.470612	1.55715	14.7594	1.62337	407	324.459	16.35	5	14.7824	2593.32	25.7017	27.6698	1	50.0019	53.8307
06/04/2018 07:20	3.58446	-98.9271	-67.9842	12.754	-1.02241	0	33.199	0.49471	1.65436	14.6675	1.69927	407.158	324.69	16.59	5	14.9994	2577.86	26.5057	28.5734	1	22.8021	24.5809
06/04/2018 07:30	6.63945	-98.8335	-67.9806	12.747	-0.918393	0	33.1956	0.545947	1.53924	14.5857	1.75076	407.137	324.712	16.76	5	15.1531	2596.18	26.9312	29.0589	1	42.914	46.3044
06/04/2018 07:40	1.07139	-98.7398	-67.9769	12.855	-0.800683	0	33.2038	0.582667	0.286835	14.5099	1.77969	406.743	324.398	16.6	5	15.0084	2805.24	25.438	27.4239	1	6.54097	7.05161
06/04/2018 07:50	3.56368	-98.6465	-67.9731	12.752	-0.192298	0	33.2088	0.584882	0	14.4345	1.8322	405.683	323.573	16.43	5	14.8547	2855.7	24.7218	26.6267	1	21.1441	22.7734
06/04/2018 08:00	3.72378	-98.5532	-67.9693	12.711	-1.21447	0	33.2122	0.5499	0	14.3591	1.85028	405.228	323.213	15.8	5	14.2851	2855.7	22.9458	24.6239	1	20.5069	22.0066
06/04/2018 08:10	9.52214	-98.4593	-67.9655	12.898	-1.16263	0	33.2059	0.585292	0	14.2825	1.78879	405.972	323.783	15.76	5	14.2489	2855.7	22.8353	24.4994	1	52.1858	55.9888
06/04/2018 08:20	nan	-98.3652	-67.9617	12.805	-1.48694	0	33.2062	0.607777	0	14.201	1.81626	405.531	323.448	15.52	5	14.032	2855.7	22.1777	23.7589	1	nan	nan
06/04/2018 08:30	4.53109	-98.2715	-67.9575	12.767	-2.7222	0	33.2041	0.615872	0	14.1177	1.8682	404.774	322.88	15.09	5	13.6432	2855.7	21.0235	22.4606	1	22.8623	24.425
06/04/2018 08:40	7.66476	-98.1782	-67.9534	12.761	-0.414327	0	33.2058	0.58791	0	14.0283	1.88613	404.477	322.65	14.23	5	12.8656	2855.7	18.8074	19.9734	1	34.597	36.7419
06/04/2018 08:50	5.1919	-98.0856	-67.9488	12.617	-1.2081	0	33.221	0.553403	0	13.9299	1.88031	404.525	322.651	13.83	5	12.504	2855.7	17.8186	18.8663	1	22.2029	23.5085
06/04/2018 09:00	3.2773	-97.9927	-67.9442	12.863	-1.74146	0	33.2291	0.524692	0	13.8235	1.82879	404.447	322.54	13.59	5	12.287	2855.7	17.2381	18.2172	1	13.5586	14.3288
06/04/2018 09:10	6.9762	-97.8994	-67.9389	12.92	-1.27426	0	33.212	0.511492	0	13.721	1.81093	404.758	322.815	13.91	5	12.5763	2855.7	18.0142	19.0852	1	30.161	31.9541
06/04/2018 09:20	4.90425	-97.8063	-67.9331	12.951	0.0230945	0	33.2119	0.487165	0	13.6188	1.80871	404.937	322.957	14.12	5	12.7662	2855.7	18.5328	19.6658	1	21.8135	23.1471
06/04/2018 09:30	3.26593	-97.7118	-67.9303	12.942	-1.48205	0	33.2107	0.500812	0	13.5195	1.79529	404.945	322.958	13.86	5	12.5311	2855.7	17.8918	18.9482	1	14.024	14.8521
06/04/2018 09:40	8.08408	-97.6173	-67.9277	12.909	-0.795853	0	33.2059	0.564315	0	13.4933	1.80132	404.697	322.774	13.96	5	12.6215	2855.7	18.137	19.2227	1	35.1891	37.2954
06/04/2018 09:50	4.00631	-97.5232	-67.9256	12.795	-1.54402	0	33.209	0.601265	0	13.5379	1.81754	404.643	322.734	14.32	5	12.947	2855.7	19.0336	20.2269	1	18.3011	19.4484
06/04/2018 10:00	9.11962	-97.4295	-67.9236	12.725	0.0267042	0	33.2114	0.678571	0	13.6138	1.80125	405.173	323.141	14.05	5	12.7029	2855.7	18.3591	19.4713	1	40.1828	42.617
06/04/2018 10:10	nan	-97.3357	-67.9218	12.829	-2.49734	0	33.2149	0.729997	0	13.6985	1.7517	405.403	323.287	14.07	5	12.721	2855.7	18.4087	19.5268	1	nan	nan
06/04/2018 10:20	nan	-97.2415	-67.9203	12.837	-0.855616	0	33.2149	0.789838	0	13.7898	1.77976	404.789	322.815	14.71	5	13.2996	2855.7	20.0291	21.3436	1	nan	nan
06/04/2018 10:30	1.57245	-97.1474	-67.9182	12.893	-0.129208	0	33.2125	0.847848	0	13.882	1.78388	404.846	322.868	14.84	5	13.4172	2855.7	20.3666	21.7225	1	7.68612	8.19783
06/04/2018 10:40	10.93	-97.0536	-67.9148	12.875	-1.34095	0	33.2123	0.883545	0	13.9795	1.83807	404.08	322.29	14.96	5	13.5257	2855.7	20.6806	22.0753	1	54.2493	57.9077
06/04/2018 10:50	26.8401	-96.9592	-67.9108	12.9	-2.82815	0	33.217	0.909678	0	14.0824	1.84148	404.069	322.273	14.55	5	13.155	2855.7	19.6176	20.8818	1	126.369	134.513
06/04/2018 11:00	1.00041	-96.8651	-67.9068	12.845	-1.07499	0	33.2157	0.937686	0	14.1906	1.85384	403.746	322.026	14.88	5	13.4533	2855.7	20.471	21.8398	1	4.91506	5.2437
06/04/2018 11:10	20.4807	-96.7711	-67.9031	12.915	-2.05833	0	33.218	0.972815	0	14.302	1.85672	403.584	321.893	14.73	5	13.3177	2855.7	20.0809	21.4017	1	98.7046	105.197
06/04/2018 11:20	18.7514	-96.6764	-67.9	13.003	-1.43192	0	33.2238	0.981563	0	14.4138	1.86813	403.203	321.583	14.24	5	12.8747	2855.7	18.8325	20.0015	1	84.7525	90.0136
06/04/2018 11:30	nan	-96.5812	-67.8981	12.938	-2.7268	0	33.2297	0.931667	0	14.5248	1.87448	403.029	321.436	13.98	5	12.6396	2855.7	18.1863	19.2778	1	nan	nan
06/04/2018 11:40	3.21584	-96.4861	-67.896	13.031	-4.09712	0	33.2392	0.783417	0	14.6357	1.85355	402.972	321.357	13.94	5	12.6034	2855.7	18.0879	19.1676	1	13.9602	14.7936
06/04/2018 11:50	3.64109	-96.391	-67.8926	12.972	-2.06353	0	33.2386	0.709147	0	14.743	1.62783	407.011	324.442	15	5	13.5618	2855.7	20.7858	22.1935	1	18.164	19.394
06/04/2018 12:00	5.51632	-96.2959	-67.8895	12.933	-1.64099	0	33.2424	0.664449	0	14.8486	1.50022	407.978	325.126	15.29	5	13.824	2855.7	21.5565	23.0599	1	28.539	30.5294
06/04/2018 12:10	6.77726	-96.2018	-67.887	12.704	-3.97848	0	33.2302	0.621598	0	14.9509	1.43999	407.901	325.055	14.47	5	13.0826	2855.7	19.4135	20.6528	1	31.5768	33.5927
06/04/2018 12:20	nan	-96.109	-67.8847	12.748	-2.88037	0	33.2384	0.659032	0	15.0527	1.39036	408.407	325.41	14.1	5	12.7481	2855.7	18.4831	19.6101	1	nan	nan
06/04/2018 12:30	1.83913	-96.016	-67.8812	12.687	-1.63938	0	33.2312	0.684883	0	15.1527	1.4207	406.961	324.292	13.56	5	12.2599	2855.7	17.1662	18.1369	1	7.57701	8.00546
06/04/2018 12:40	11.5501	-95.9225	-67.8777	12.905	-2.36124	0	33.2283	0.715805	0	15.2505	1.43081	407.293	324.569	13.42	5	12.1333	2855.7	16.8327	17.7643	1	46.6604	49.2429
06/04/2018 12:50	5.33188	-95.8294	-67.8741	12.762	-2.25023	0	33.2243	0.701078	0	15.3456	1.51418	406.388	323.908	14.09	5	12.7391	2855.7	18.4583	19.5823	1	23.6202	25.0586
06/04/2018 13:00	nan	-95.7363	-67.8711	12.793	-3.14408	0	33.2395	0.711792	0	15.4396	1.50702	406.938	324.308	14.3	5	12.9289	2855.7	18.9832	20.1704	1	nan	nan
06/04/2018 13:10	20.2311	-95.6431	-67.8677	12.779	-1.97322	0	33.2492	0.755117	0	15.4901	1.46877	407.864	325.001	14.36	5	12.9832	2855.7	19.1345	20.34	1	92.9067	98.76
06/04/2018 13:20	nan	-95.5497	-67.8645	12.74	-1.41798	0	33.2342	0.814909	1.50061	15.6529	1.54827	406.432	323.941	14.5	5	13.1098	2602.37	20.4165	21.7245	1	nan	nan
06/04/2018 13:30	nan	-95.4562	-67.8616	12.705	-2.45576	0	33.2326	0.761527	1.53028	15.6897	1.59244	406.606	324.11	14.25	5	12.8837	2597.62	19.7722	21.0011	1	nan	nan
06/04/2018 13:40	0.590585	-95.3632	-67.8588	12.667	-0.771292	0	33.2394	0.673498	1.49881	15.7218	1.5977	406.409	323.941	14.53	5	13.1369	2602.66	20.4956	21.8133	1	2.90505	3.09183
06/04/2018 13:50	12.0252	-95.2706	-67.8556	12.687	-0.77777	0	33.2513	0.616393	1.38561	15.7214	1.50668	407.253	324.532	14.01	5	12.6667	2620.87	19.0608	20.2093	1	55.0101	58.325
06/04/2018 14:00	5.59273	-95.1778	-67.8534	12.756	-0.508624	0	33.2483	0.66812	0.210519	15.7087	1.46015	407.902	325.028	13.4	5	12.1152	2818.57	16.8955	17.8276	1	22.678	23.9293
06/04/2018 14:10	nan	-95.0849	-67.8501	12.65	-2.18018	0	33.2392	0.732898	0	15.742	1.54061	406.436	323.929	13.42	5	12.1333	2855.7	16.8327	17.7643	1	nan	nan
06/04/2018 14:20	nan	-94.9915	-67.8467	12.874	-1.86693	0	33.2375	0.766745	0	15.8065	1.62604	405.057	322.885	13.56	5	12.2599	2855.7	17.1662	18.1369	1	nan	nan
06/04/2018 14:30	11.4689	-94.8979	-67.8434	12.794	-1.79785	0	33.2335	0.762297	0	15.8765	1.63641	405.344	323.129	12.6	5	11.3919	2855.7	14.9447	15.6597	1	41.136	43.1041
06/04/2018 14:40	4.57717	-94.8044	-67.8406	12.835	-0.152185	0	33.2399	0.726181	1.52475	15.9466	1.6174	405.762	323.436	11.98	0	10.8314	2598.5	14.2483	14.8406	1	15.652	16.3027
06/04/2018 14:50	3.97491	-94.7108	-67.8376	12.889	-1.6116	0	33.2467	0.672488	1.46568	16.005	1.5597	406.41	323.903	12.64	0	11.4281	2607.97	15.732	16.4908	1	15.008	15.7319
06/04/2018 15:00	8.64273	-94.6167	-67.8346	12.816	-2.10624	0	33.2524	0.660951	1.38182	16.049	1.4775	407.748	324.907	13.18	0	11.9163	2621.48	16.9797	17.8836	1	35.2202	37.0952
06/04/2018 15:10	0.422146	-94.5224	-67.8315	12.872	-2.17881	0	33.2523	0.61373	1.39275	16.0845	1.45322	407.732	324.879	13.25	0	11.9796	2619.72	17.1562	18.0802	1	1.73818	1.8318
06/04/2018 15:20	nan	-94.4279	-67.8281	13.023	-1.85153	0	33.2531	0.705828	1.31376	16.1159	1.40378	408.705	325.622	12.76	0	11.5366	2632.51	15.9399	16.7269	1	nan	nan
06/04/2018 15:30	10.8656	-94.3326	-67.8252	13.075	-1.2961	0	33.2391	0.75981	1.46369	16.1455	1.47024	407.936	325.081	13.42	0	12.1333	2608.29	17.6129	18.5877	1	45.9298	48.4719
06/04/2018 15:40	13.799	-94.2369	-67.8219	13.117	-0.254404	0	33.2357	0.797652	1.54437	16.1806	1.59866	406.598	324.101	12.23	0	11.0574	2595.36	14.8212	15.4758	1	49.0842	51.2522
06/04/2018 15:50	15.1523	-94.1416	-67.8185	13.074	-3.75637	0	33.2317	0.882825	1.55795	16.2171	1.61392	406.698	324.199	12.38	0	11.193	2593.2	15.1713	15.8644	1	55.1713	57.6916
06/04/2018 16:00	6.85275	-94.0462	-67.8148	13.083	0.341061	0	33.226	0.774219	1.65863	16.248	1.68348	405.516	323.311	13.04	0	11.7897	2577.18	16.7833	17.6556	1	27.6028	29.0374
06/04/2018 16:10	4.10124	-93.9509	-67.8117	13.001	1.11822	0	33.2367	0.761858	1.54152	16.2708	1.69036	406.013	323.688	12.94	0	11.6993	2595.82	16.4818	17.3233	1	16.223	17.0513
06/04/2018 16:20	3.03393	-93.8554	-67.8089	13.177	-0.308323	0	33.2356	0.779903	1.46618	16.2889	1.52986	408.174	325.315	12.89	0	11.6541	2607.89	16.3239	17.1498	1	11.8862	12.4875
06/04/2018 16:30	3.58344	-93.7602	-67.8055	12.958	-1.22018	0	33.2319	0.738965	1.54104	16.3141	1.59955	407.012	324.44	12.13	0	10.967	2595.9	14.5926	15.2222	1	12.55	13.0915
06/04/2018 16:40	2.53304	-93.6652	-67.8024	13.067	-0.115357	0	33.2376	0.77956	1.44986	16.3647	1.54293	408.084	325.247	12.72	0	11.5004	2610.52	15.9124	16.6921	1	9.67365	10.1476
06/04/2018 16:50	0.117365	-93.5701	-67.7995	13.023	-1.48505	0	33.2376	0.846623	1.47067	16.4301	1.52889	407.881	325.077	12.69	0	11.4733	2607.17	15.8519	16.6241	1	0.446511	0.46826
06/04/2018 17:00	4.6394	-93.4748	-67.7966	13.084	-2.79762	0	33.2355	0.875602	1.50851	16.4994	1.55187	407.521	324.809	13.23	0	11.9615	2601.1	17.1684	18.0901	1	19.1163	20.1425
06/04/2018 17:10	nan	-93.3793	-67.7934	13.16	-1.09014	0	33.2353	0.852127	1.54538	16.5644	1.61507	406.714	324.204	12.1	0	10.9399	2595.2	14.5268	15.149	1	nan	nan
06/04/2018 17:20	8.71691	-93.2831	-67.7899	13.301	1.74849	0	33.2377	0.905073	1.47175	16.6285	1.56288	407.819	325.048	11.75	0	10.6234	2607	13.7167	14.2529	1	28.696	29.818
06/04/2018 17:30	nan	-93.1864	-67.7864	13.363	-0.249696	0	33.2335	0.971588	1.51302	16.6893	1.54718	408.072	325.249	11.15	0	10.081	2600.38	12.4496	12.8508	1	nan	nan
06/04/2018 17:40	11.6024	-93.0895	-67.7826	13.332	-0.507693	0	33.2318	0.971867	1.61409	16.7467	1.65741	406.312	323.917	10.47	0	9.46615	2584.25	11.1042	11.3664	1	30.9206	31.6507
06/04/2018 17:50	nan	-92.9926	-67.7788	13.251	-1.57908	0	33.2335	0.908203	1.61935	16.7917	1.70728	405.735	323.484	11.19	0	10.1171	2583.42	12.5744	12.9856	1	nan	nan
06/04/2018 18:00	17.2386	-92.8958	-67.7765	13.301	0.125937	0	33.2361	0.790993	1.5611	16.8284	1.66485	406.572	324.12	11.63	0	10.5149	2592.69	13.4921	14.0018	1	55.8206	57.9291
06/04/2018 18:10	7.43505	-92.7986	-67.7738	13.37	-1.23131	0	33.2462	0.778027	1.39735	16.8638	1.51247	408.95	325.9	9.99	0	9.03217	2618.98	10.1082	10.2793	1	18.0371	18.3425
06/04/2018 18:20	16.9944	-92.7015	-67.771	13.264	-0.962901	0	33.2458	0.761362	1.41195	16.8992	1.47282	408.842	325.79	11.55	0	10.4426	2616.62	13.2576	13.7465	1	54.0733	56.0673
06/04/2018 18:30	23.6102	-92.605	-67.7679	13.381	-0.878258	0	33.2433	0.721528	1.38859	16.9341	1.48719	408.783	325.758	11.87	0	10.7319	2620.39	13.945	14.5083	1	79.0183	82.2105
06/04/2018 18:40	3.96041	-92.5092	-67.7647	13.062	-1.48881	0	33.246	0.729635	0.975245	16.9685	1.18055	409.291	325.968	10.17	5	9.19491	2688.11	10.3141	10.5152	1	9.80349	9.99467
06/04/2018 18:50	7.35847	-92.4141	-67.7615	13.123	-0.803048	0	33.2475	0.722703	1.27551	17.0015	1.22206	408.273	325.179	9.93	0	8.97792	2638.72	9.95824	10.1181	1	17.5866	17.869
06/04/2018 19:00	16.7667	-92.319	-67.7585	13.02	-0.583036	0	33.2481	0.72482	1.36887	17.0325	1.42486	408.655	325.607	9.44	0	8.5349	2623.58	9.09271	9.17056	1	36.5891	36.9024
06/04/2018 19:10	0.298779	-92.2242	-67.7554	13.026	0.237238	0	33.2483	0.728778	1.39569	17.0635	1.46588	408.198	325.267	9.26	0	8.37216	2619.24	8.78194	8.83147	1	0.629727	0.633278
06/04/2018 19:20	4.11114	-92.1293	-67.7519	13.019	-2.16846	0	33.2476	0.71516	1.39684	17.0972	1.47473	408.036	325.145	10.03	0	9.06833	2619.06	10.1833	10.3616	1	10.0476	10.2235
06/04/2018 19:30	2.10004	-92.0347	-67.7485	13.061	0.300718	0	33.2424	0.737605	1.36519	17.13	1.4512	409.017	325.924	9.88	0	8.93272	2624.17	9.89267	10.0442	1	4.98599	5.06238
06/04/2018 19:40	14.5628	-91.9401	-67.745	12.992	-0.148324	0	33.2414	0.819058	1.38285	17.1639	1.44632	409.474	326.287	9.48	0	8.57107	2621.32	9.1681	9.25243	1	32.0433	32.338
06/04/2018 19:50	nan	-91.8457	-67.7418	12.971	nan	0	33.2353	0.852528	1.49822	17.1969	1.54071	407.589	324.856	10.09	0	9.12258	2602.75	10.329	10.5188	1	nan	nan
06/04/2018 20:00	nan	-91.7513	-67.7387	13.058	nan	0	33.2329	0.883773	1.51815	17.2284	1.57489	407.412	324.742	9.18	0	8.29983	2599.56	8.67494	8.71233	1	nan	nan
06/04/2018 20:10	nan	-91.6567	-67.7354	13.079	nan	0	33.232	0.894927	1.55539	17.257	1.6121	406.891	324.35	10.38	0	9.38478	2593.61	10.9074	11.1517	1	nan	nan
06/04/2018 20:20	nan	-91.5622	-67.7322	12.926	nan	0	33.2351	0.85413	1.55488	17.2857	1.62339	406.873	324.337	10.46	0	9.45711	2593.69	11.0643	11.3241	1	nan	nan
06/04/2018 20:30	nan	-91.4682	-67.7298	12.869	nan	0	33.2346	0.855753	1.50043	17.3137	1.59942	407.322	324.681	10.35	0	9.35765	2602.4	10.8304	11.0686	1	nan	nan
06/04/2018 20:40	nan	-91.3748	-67.7271	12.733	nan	0	33.2265	0.857902	1.48462	17.3363	1.54298	408.129	325.307	10.03	0	9.06833	2604.93	10.2109	10.3897	1	nan	nan
06/04/2018 20:50	nan	-91.2815	-67.7239	12.87	nan	0	33.2225	0.895543	1.49997	17.3555	1.56287	407.703	324.989	9.9	0	8.9508	2602.47	9.97119	10.1269	1	nan	nan
06/04/2018 21:00	nan	-91.1881	-67.7204	12.937	nan	0	33.2182	0.919741	1.55896	17.3732	1.60861	407.055	324.51	10.47	0	9.46615	2593.04	11.0854	11.3472	1	nan	nan
06/04/2018 21:10	nan	-91.0946	-67.7166	12.869	nan	0	33.2178	0.960537	1.5909	17.3996	1.65083	406.321	323.952	10.97	0	9.91821	2587.94	12.1055	12.4691	1	nan	nan
06/04/2018 21:20	nan	-91.0014	-67.7113	12.93	nan	0	33.219	1.03295	1.61081	17.4353	1.66915	406.077	323.765	9.7	0	8.76997	2584.77	9.63352	9.75509	1	nan	nan
06/04/2018 21:30	nan	-90.9082	-67.706	13.007	nan	0	33.2234	1.02407	1.65375	17.476	1.69395	405.685	323.458	10.49	0	9.48423	2577.95	11.1574	11.4238	1	nan	nan
06/04/2018 21:40	nan	-90.8147	-67.7006	13.08	nan	0	33.2176	0.876847	1.67386	17.5157	1.76671	404.055	322.216	10.19	0	9.21299	2574.77	10.5772	10.7864	1	nan	nan
06/04/2018 21:50	nan	-90.7208	-67.6953	12.984	nan	0	33.1668	0.78809	1.39315	17.5552	1.54469	407.444	324.895	10.96	0	9.90917	2619.65	12.0115	12.3708	1	nan	nan
06/04/2018 22:00	nan	-90.6264	-67.6916	13.034	nan	0	33.1513	0.672198	1.3075	17.5925	1.4162	408.616	325.786	11.27	0	10.1894	2633.52	12.6213	13.046	1	nan	nan
06/04/2018 22:10	nan	-90.532	-67.6881	13.11	nan	0	33.1155	0.737273	1.13033	17.6278	1.24118	410.74	327.452	11.18	0	10.1081	2662.47	12.3656	12.7685	1	nan	nan
06/04/2018 22:20	nan	-90.4366	-67.6856	13.132	nan	0	33.1469	0.808427	1.23433	17.663	1.24026	409.943	326.746	10.98	0	9.92725	2645.44	11.9936	12.3553	1	nan	nan
06/04/2018 22:30	nan	-90.3412	-67.6842	13.139	nan	0	33.1664	0.686687	1.38598	17.6988	1.44087	407.459	324.845	9.91	0	8.95984	2620.81	9.95488	10.1118	1	nan	nan
06/04/2018 22:40	nan	-90.2455	-67.6832	13.054	nan	0	33.1352	0.636198	1.22281	17.7343	1.37299	408.752	325.904	10.32	0	9.33053	2647.32	10.6803	10.9108	1	nan	nan
06/04/2018 22:50	27.9421	-90.15	-67.6827	13.12	nan	0	33.1198	0.645577	1.11695	17.77	1.21698	410.671	327.372	10.84	0	9.80067	2664.67	11.6672	11.9987	1	78.2414	80.4647
06/04/2018 23:00	16.7149	-90.0556	-67.6826	12.975	nan	0	33.1337	0.692759	1.14919	17.8043	1.21521	410.436	327.153	10.3	0	9.31245	2659.38	10.6176	10.8438	1	42.5932	43.5008
06/04/2018 23:10	6.47413	-89.963	-67.6805	12.745	nan	0	33.1451	0.738075	1.23122	17.8365	1.29039	409.91	326.754	10.67	0	9.64697	2645.95	11.3681	11.6664	1	17.6636	18.1272
06/04/2018 23:20	14.0735	-89.8711	-67.6776	12.486	nan	0	33.1637	0.772587	1.29565	17.8692	1.3459	409.246	326.218	10.82	0	9.78259	2635.45	11.6913	12.0206	1	39.4892	40.6013
06/04/2018 23:30	3.71657	-89.7799	-67.6744	12.706	nan	0	33.166	0.905118	1.3288	17.897	1.40216	408.708	325.818	10.11	0	9.14066	2630.07	10.3132	10.5055	1	9.19909	9.37068
06/04/2018 23:40	15.5258	-89.6887	-67.6709	12.665	nan	0	33.1935	0.937597	1.5075	17.9249	1.51782	407.039	324.497	11.02	0	9.96341	2601.26	12.1775	12.5508	1	45.3756	46.7664
06/04/2018 23:50	10.6405	-89.5981	-67.6675	12.422	nan	0	33.1927	1.02771	1.53267	17.9527	1.61868	407.216	324.701	10.62	0	9.60177	2597.24	11.3741	11.6652	1	29.0461	29.7896
07/04/2018 00:00	nan	-89.5072	-67.6645	12.542	nan	0	33.2276	1.01032	1.62464	17.9785	1.66247	404.77	322.7	10.81	0	9.77355	2582.57	11.79	12.1206	1	nan	nan
07/04/2018 00:10	6.27262	-89.4156	-67.6612	12.67	nan	0	33.216	1.0066	1.6224	18.0022	1.72313	403.977	322.13	9.7	0	8.76997	2582.93	9.63696	9.75856	1	14.5077	14.6908
07/04/2018 00:20	19.189	-89.3239	-67.6582	12.651	nan	0	33.2023	1.0573	1.53519	18.0243	1.61816	406.313	323.96	10.18	0	9.20395	2596.83	10.513	10.7195	1	48.416	49.3669
07/04/2018 00:30	14.1862	-89.2321	-67.6552	12.705	nan	0	33.2362	1.03646	1.67761	18.0439	1.72626	403.396	321.624	10.29	0	9.30341	2574.17	10.7724	11.0005	1	36.6766	37.4531
07/04/2018 00:40	nan	-89.1409	-67.6517	12.644	nan	0	33.2331	1.04032	1.62434	18.062	1.70913	404.199	322.261	10.22	0	9.24012	2582.62	10.619	10.8335	1	nan	nan
07/04/2018 00:50	nan	-89.0496	-67.6489	12.549	nan	0	33.2379	1.02933	1.63699	18.0781	1.71243	403.204	321.459	11.23	0	10.1533	2580.61	12.6655	13.0857	1	nan	nan
07/04/2018 01:00	nan	-88.9585	-67.6451	12.571	nan	0	33.2378	1.02049	1.63345	18.0916	1.71215	403.784	321.921	10.25	0	9.26724	2581.18	10.6801	10.9003	1	nan	nan
07/04/2018 01:10	nan	-88.8679	-67.6414	12.698	nan	0	33.2376	1.02067	1.62796	18.1051	1.71213	403.101	321.378	9.45	0	8.54394	2582.05	9.18352	9.26361	1	nan	nan
07/04/2018 01:20	4.57529	-88.7757	-67.6394	12.74	nan	0	33.2435	1.03664	1.6318	18.1172	1.70794	402.698	321.041	9.46	0	8.55299	2581.44	9.2026	9.28432	1	10.1051	10.1948
07/04/2018 01:30	nan	-88.6836	-67.6377	12.795	nan	0	33.2441	1.10508	1.64756	18.1297	1.71477	403.71	321.85	9.19	0	8.30887	2578.94	8.72709	8.76617	1	nan	nan
07/04/2018 01:40	0.651476	-88.5913	-67.6359	12.682	nan	0	33.2467	1.16088	1.75209	18.144	1.79955	404.404	322.449	8.09	0	7.31434	2562.41	6.92578	6.81509	1	1.08288	1.06557
07/04/2018 01:50	0.460432	-88.499	-67.6342	12.706	nan	0	33.2482	1.1833	1.82773	18.1567	1.88673	403.354	321.661	9.5	0	8.58915	2550.53	9.33079	9.41957	1	1.03109	1.0409
07/04/2018 02:00	2.76367	-88.4065	-67.6326	12.727	nan	0	33.2469	1.22934	1.83927	18.1683	1.92282	402.953	321.366	10.12	0	9.14971	2548.72	10.4957	10.693	1	6.96161	7.09245
07/04/2018 02:10	nan	-88.3147	-67.6307	12.553	nan	0	33.2452	1.16144	1.96404	18.1792	1.97173	402.853	321.319	10.47	0	9.46615	2529.27	11.2243	11.4893	1	nan	nan
07/04/2018 02:20	nan	-88.2239	-67.628	12.482	nan	0	33.2366	1.06783	2.00635	18.1874	2.12432	402.931	321.492	9.23	0	8.34504	2522.72	8.89488	8.94063	1	nan	nan
07/04/2018 02:30	1.7763	-88.1337	-67.6251	12.551	nan	0	33.219	1.0506	1.84749	18.1957	1.95078	403.589	321.952	10.72	0	9.69218	2547.44	11.6873	12.0015	1	4.98241	5.11639
07/04/2018 02:40	nan	-88.0432	-67.6224	12.476	nan	0	33.2231	1.04605	1.84789	18.2018	1.92119	402.659	321.183	9.8	0	8.86039	2547.37	9.89033	10.0301	1	nan	nan
07/04/2018 02:50	0.680184	-87.9538	-67.6198	12.311	nan	0	33.2338	1.04507	1.88192	18.2102	1.96026	401.544	320.294	9.56	0	8.6434	2542.05	9.45593	9.55481	1	1.54363	1.55977
07/04/2018 03:00	0.0850379	-87.8647	-67.617	12.241	nan	0	33.234	1.14636	1.8429	18.2204	1.92342	401.804	320.478	10.38	0	9.38478	2548.15	11.0042	11.2507	1	0.224586	0.229617
07/04/2018 03:10	1.21364	-87.776	-67.6151	12.286	nan	0	33.2383	1.16694	2.02724	18.2305	2.05468	401.76	320.513	9.7	0	8.76997	2519.49	9.75754	9.88067	1	2.84211	2.87798
07/04/2018 03:20	nan	-87.6874	-67.6138	12.235	nan	0	33.2392	1.17258	2.04792	18.2421	2.12222	401.853	320.626	10.1	0	9.13162	2516.29	10.5244	10.7192	1	nan	nan
07/04/2018 03:30	nan	-87.5986	-67.6128	12.278	nan	0	33.2412	1.16986	2.01286	18.2526	2.09563	402.629	321.224	10.18	0	9.20395	2521.71	10.6684	10.8779	1	nan	nan
07/04/2018 03:40	nan	-87.5093	-67.6113	12.351	nan	0	33.2421	1.18954	2.01914	18.2639	2.10041	403.148	321.639	10.32	0	9.33053	2520.74	10.9451	11.1814	1	nan	nan
07/04/2018 03:50	nan	-87.4199	-67.6079	12.343	nan	0	33.2421	1.20224	2.03795	18.2762	2.10443	403.437	321.872	10.59	0	9.57464	2517.83	11.4913	11.7809	1	nan	nan
07/04/2018 04:00	nan	-87.3307	-67.6042	12.412	nan	0	33.2444	1.2408	2.05841	18.2877	2.13398	403.034	321.563	11.02	0	9.96341	2514.67	12.3854	12.765	1	nan	nan
07/04/2018 04:10	nan	-87.2406	-67.6003	12.457	nan	0	33.2434	1.2474	2.08855	18.2984	2.14649	402.894	321.461	10.53	0	9.5204	2510.03	11.3878	11.6658	1	nan	nan
07/04/2018 04:20	nan	-87.1504	-67.596	12.682	nan	0	33.2431	1.25627	2.11331	18.3106	2.19744	402.565	321.23	9.44	0	8.5349	2506.22	9.30316	9.38281	1	nan	nan
07/04/2018 04:30	nan	-87.0597	-67.5918	12.533	nan	0	33.243	1.28307	2.09932	18.3226	2.16955	402.949	321.52	8.78	0	7.93818	2508.37	8.13471	8.11319	1	nan	nan
07/04/2018 04:40	nan	-86.9694	-67.5875	12.514	nan	0	33.2402	1.2426	2.10242	18.3361	2.20799	402.402	321.112	10.06	0	9.09546	2507.9	10.4645	10.6522	1	nan	nan
07/04/2018 04:50	nan	-86.8786	-67.583	12.72	nan	0	33.2418	1.18741	1.90375	18.3483	2.03121	402.929	321.423	9.12	0	8.24558	2538.65	8.67274	8.70136	1	nan	nan
07/04/2018 05:00	nan	-86.7874	-67.5784	12.636	nan	0	33.2444	1.15511	1.80914	18.3598	1.91195	404.186	322.349	9.35	0	8.45353	2553.44	9.05484	9.11925	1	nan	nan
07/04/2018 05:10	nan	-86.6958	-67.5738	12.786	nan	0	33.2437	1.14002	1.77522	18.3688	1.86283	405.064	323.021	8.3	0	7.50421	2558.77	7.26378	7.17859	1	nan	nan
07/04/2018 05:20	nan	-86.6038	-67.5691	12.853	nan	0	33.2435	1.13857	1.76793	18.38	1.84212	405.08	323.021	8.06	0	7.28722	2559.92	6.88222	6.76793	1	nan	nan
07/04/2018 05:30	nan	-86.5119	-67.5645	12.741	nan	0	33.2449	1.12934	1.76726	18.3889	1.84218	404.545	322.592	9.21	0	8.32696	2560.02	8.79451	8.83682	1	nan	nan
07/04/2018 05:40	nan	-86.4198	-67.5601	12.865	nan	0	33.2445	1.11604	1.76399	18.3968	1.84563	404.236	322.348	9.9	0	8.9508	2560.54	10.0525	10.2095	1	nan	nan
07/04/2018 05:50	nan	-86.3271	-67.5567	12.753	nan	0	33.245	1.07546	1.75753	18.3964	1.83484	404.332	322.418	9.04	0	8.17325	2561.56	8.49463	8.51106	1	nan	nan
07/04/2018 06:00	nan	-86.2349	-67.5535	12.811	nan	0	33.243	0.985802	1.73885	18.3926	1.8185	404.542	322.579	9.19	0	8.30887	2564.5	8.75162	8.79081	1	nan	nan
07/04/2018 06:10	nan	-86.1423	-67.5503	12.889	nan	0	33.2373	1.02224	1.6237	18.3879	1.73512	402.913	321.242	8.68	0	7.84777	2582.72	7.84954	7.81447	1	nan	nan
07/04/2018 06:20	4.97861	-86.0494	-67.5478	12.952	-3.27518	0	33.2385	0.981683	1.67307	18.3855	1.70586	402.216	320.666	8.16	0	7.37763	2574.89	7.0188	6.91671	1	8.38652	8.26454
07/04/2018 06:30	nan	-85.9563	-67.5452	12.859	-3.33518	0	33.2383	0.985172	1.66854	18.3856	1.77674	402.529	320.96	7.34	0	6.63625	2575.61	5.78543	5.59566	1	nan	nan
07/04/2018 06:40	nan	-85.8628	-67.5423	12.985	-4.25246	0	33.2382	1.08705	1.61753	18.3846	1.67363	401.848	320.354	8.7	0	7.86585	2583.71	7.88134	7.84903	1	nan	nan
07/04/2018 06:50	5.85602	-85.769	-67.5394	12.957	-3.43083	0	33.2395	1.09554	1.78184	18.3839	1.80522	402.004	320.555	7.76	0	7.01598	2557.73	6.42428	6.27617	1	9.02896	8.82081
07/04/2018 07:00	2.63364	-85.6758	-67.5351	12.886	-3.40714	0	33.2396	1.09663	1.8066	18.379	1.89425	402.394	320.92	7.66	0	6.92557	2553.84	6.27894	6.12011	1	3.96875	3.86836
07/04/2018 07:10	nan	-85.5828	-67.5298	12.976	-3.79474	0	33.2393	1.12786	1.76368	18.3734	1.83413	402.001	320.57	8.56	0	7.73928	2560.59	7.68417	7.63267	1	nan	nan
07/04/2018 07:20	0.624313	-85.4898	-67.5245	13.096	-2.72115	0	33.2406	1.1257	1.82388	18.3661	1.87757	402.471	320.968	8.25	0	7.459	2551.13	7.19452	7.10297	1	1.07799	1.06427
07/04/2018 07:30	nan	-85.3964	-67.5191	12.99	-2.58107	0	33.2414	1.09988	1.82256	18.3567	1.89765	402.678	321.144	8.45	0	7.63982	2551.34	7.51736	7.45123	1	nan	nan
07/04/2018 07:40	2.3785	-85.3036	-67.5138	13.03	-3.59996	0	33.2459	1.09518	1.77835	18.3466	1.86366	403.328	321.632	9.36	0	8.46257	2558.28	9.06418	9.13012	1	5.17419	5.21183
07/04/2018 07:50	1.7161	-85.2109	-67.5085	12.96	-2.99095	0	33.2447	1.08491	1.77472	18.3377	1.83727	403.803	321.998	9.32	0	8.42641	2558.85	8.99168	9.05124	1	3.70335	3.72788
07/04/2018 08:00	nan	-85.1176	-67.5065	13.03	-3.72941	0	33.2447	1.065	1.77841	18.326	1.86158	403.205	321.535	8.56	0	7.73928	2558.27	7.68765	7.63613	1	nan	nan
07/04/2018 08:10	nan	-85.0234	-67.5057	13.048	-2.5272	0	33.2461	1.06355	1.74527	18.316	1.81942	404.221	322.317	8.52	0	7.70311	2563.49	7.61402	7.55723	1	nan	nan
07/04/2018 08:20	0.0285991	-84.9296	-67.5037	13.119	-3.51559	0	33.2464	1.09049	1.74564	18.3038	1.81774	404.13	322.242	8.53	0	7.71215	2563.43	7.63053	7.57507	1	0.0523743	0.0519935
07/04/2018 08:30	nan	-84.8354	-67.5008	13.046	-2.71809	0	33.2469	1.10194	1.78452	18.2878	1.84207	403.49	321.746	8.32	0	7.52229	2557.31	7.29799	7.21529	1	nan	nan
07/04/2018 08:40	2.71609	-84.7412	-67.5	13.176	-2.95475	0	33.245	1.09664	1.80952	18.2668	1.8741	403.133	321.484	8.76	0	7.9201	2553.39	8.02891	8.00477	1	5.23373	5.218
07/04/2018 08:50	0.40229	-84.6467	-67.5018	13.088	-4.11706	0	33.2467	1.10431	1.80264	18.2471	1.87444	403.251	321.575	7.61	0	6.88036	2554.46	6.20373	6.03974	1	0.598968	0.583135
07/04/2018 09:00	1.8432	-84.5529	-67.5026	12.928	-3.65893	0	33.2493	1.12662	1.80874	18.2255	1.86707	403.731	321.948	7.07	0	6.39214	2553.51	5.42876	5.21398	1	2.4015	2.30649
07/04/2018 09:10	0.802261	-84.459	-67.5005	13.075	-3.41825	0	33.2539	1.09517	1.85343	18.2026	1.91219	402.433	320.93	7.62	0	6.8894	2546.51	6.22829	6.06508	1	1.19921	1.16779
07/04/2018 09:20	0.549564	-84.3645	-67.4981	13.166	-3.35972	0	33.242	1.07724	1.82499	18.1772	1.91173	403.311	321.656	8.38	0	7.57653	2550.96	7.40402	7.32884	1	0.976555	0.966639
07/04/2018 09:30	3.51699	-84.2703	-67.4952	13.067	-2.98305	0	33.2329	1.1008	1.7727	18.1446	1.83922	405.385	323.286	8.35	0	7.54941	2559.17	7.34366	7.26478	1	6.19863	6.13205
07/04/2018 09:40	nan	-84.1783	-67.4895	12.884	-2.97575	0	33.2466	1.10937	1.83134	18.1148	1.88159	403.95	322.137	9.83	0	8.88751	2549.96	9.94153	10.0865	1	nan	nan
07/04/2018 09:50	3.38788	-84.0844	-67.4856	13.145	-3.02243	0	33.2539	1.10825	1.85885	18.0786	1.9224	402.309	320.837	9.51	0	8.59819	2545.66	9.35792	9.44843	1	7.60884	7.68244
07/04/2018 10:00	nan	-83.9906	-67.481	13.131	-3.26035	0	33.2547	1.09223	1.85825	18.0413	1.9179	402.214	320.757	9.85	0	8.90559	2545.75	9.98735	10.1359	1	nan	nan
07/04/2018 10:10	1.70079	-83.8966	-67.4758	13.062	-3.68842	0	33.2497	1.08106	1.84516	18.0031	1.91343	402.272	320.811	9.66	0	8.73381	2547.8	9.62913	9.74474	1	3.93052	3.97771
07/04/2018 10:20	nan	-83.8024	-67.4705	13.151	-2.79895	0	33.2438	1.07742	1.82986	17.9702	1.8895	403.548	321.828	10.46	0	9.45711	2550.2	11.1582	11.4202	1	nan	nan
07/04/2018 10:30	nan	-83.708	-67.4665	13.072	-3.31381	0	33.2414	1.09216	1.8293	17.9681	1.88401	403.775	322.01	10.33	0	9.33957	2550.28	10.9012	11.138	1	nan	nan
07/04/2018 10:40	nan	-83.6134	-67.4651	13.124	-2.57543	0	33.2333	1.12435	1.79659	17.9877	1.85696	404.489	322.581	9.54	0	8.62532	2555.41	9.39467	9.48997	1	nan	nan
07/04/2018 10:50	1.93681	-83.5188	-67.4626	13.108	-3.39782	0	33.2375	1.13281	1.82028	18.0134	1.8748	404.035	322.221	9.23	0	8.34504	2551.7	8.84422	8.88971	1	4.11109	4.13224
07/04/2018 11:00	nan	-83.4243	-67.4598	13.151	-2.53507	0	33.2317	1.17223	1.79317	18.0407	1.85289	405.106	323.075	10.09	0	9.12258	2555.95	10.4232	10.6146	1	nan	nan
07/04/2018 11:10	0.918159	-83.3301	-67.457	13.036	-2.697	0	33.2375	1.21117	1.82155	18.0675	1.8563	404.789	322.811	9.63	0	8.70669	2551.5	9.56684	9.67729	1	2.10813	2.13247
07/04/2018 11:20	2.84361	-83.2362	-67.4541	13.176	-3.45049	0	33.2422	1.21591	1.87086	18.0937	1.91647	402.874	321.31	9.15	0	8.27271	2543.78	8.71668	8.74986	1	5.94884	5.97148
07/04/2018 11:30	0.76875	-83.1428	-67.4507	13.045	-3.01307	0	33.2417	1.20311	1.53609	18.1196	1.79668	403.212	321.509	8.98	5	8.11901	2596.69	8.33397	8.34145	1	1.53762	1.539
07/04/2018 11:40	nan	-83.0491	-67.4475	13.093	-4.09708	0	33.2415	1.25751	1.48942	18.1428	1.39415	403.12	321.192	8.81	5	7.96531	2604.16	8.034	8.01709	1	nan	nan
07/04/2018 11:50	nan	-82.955	-67.4444	13.137	-3.28962	0	33.2426	1.26255	1.88712	18.1669	1.87916	402.191	320.742	9	0	8.13709	2541.24	8.45903	8.46956	1	nan	nan
07/04/2018 12:00	nan	-82.8607	-67.4412	13.085	-2.33147	0	33.2413	1.2861	1.85849	18.193	1.96321	401.931	320.588	9.01	0	8.14613	2545.71	8.46892	8.48093	1	nan	nan
07/04/2018 12:10	0.160968	-82.7665	-67.4378	13.056	-3.03822	0	33.2394	1.26041	1.91997	18.2181	1.90695	402.239	320.804	8.82	0	7.97435	2536.12	8.15808	8.14237	1	0.315165	0.314558
07/04/2018 12:20	0.425098	-82.6728	-67.4346	12.998	-3.24834	0	33.24	1.25953	1.9449	18.2464	2.01077	401.948	320.633	8.68	0	7.84777	2532.25	7.92739	7.89197	1	0.80878	0.805167
07/04/2018 12:30	2.37961	-82.5795	-67.432	13.002	-3.91886	0	33.2363	1.25153	1.93633	18.2731	1.99317	402.441	321.024	9.12	0	8.24558	2533.58	8.68142	8.71007	1	4.95802	4.97438
07/04/2018 12:40	nan	-82.4866	-67.4287	12.872	-3.59079	0	33.2377	1.27192	1.9232	18.3014	1.98427	400.157	319.193	9.88	0	8.93272	2535.62	10.0639	10.2181	1	nan	nan
07/04/2018 12:50	0.514273	-82.3943	-67.425	12.863	-3.75131	0	33.2373	1.35718	1.94785	18.329	1.99014	399.484	318.661	9.4	0	8.49874	2531.79	9.18364	9.25638	1	1.13349	1.14247
07/04/2018 13:00	nan	-82.3026	-67.4208	12.862	-3.1143	0	33.2307	1.45588	2.05296	18.3564	2.0588	399.278	318.551	9.69	0	8.76093	2515.51	9.74658	9.86809	1	nan	nan
07/04/2018 13:10	0.435429	-82.2111	-67.4167	12.706	-3.72367	0	33.2253	1.47855	2.17965	18.3847	2.18856	397.361	317.111	9.88	0	8.93272	2496.06	10.1434	10.2988	1	1.06001	1.07625
07/04/2018 13:20	2.9145	-82.1197	-67.4129	12.691	-3.13463	0	33.2301	1.50523	2.20138	18.4131	2.25829	396.554	316.497	10.32	0	9.33053	2492.74	11.0064	11.244	1	7.69876	7.86493
07/04/2018 13:30	nan	-82.0286	-67.4091	12.65	-3.31541	0	33.2337	1.5684	2.19888	18.4433	2.24391	396.575	316.498	10.32	0	9.33053	2493.12	11.0056	11.2431	1	nan	nan
07/04/2018 13:40	0.801969	-81.9373	-67.4052	12.813	-2.87903	0	33.2349	1.60562	2.26652	18.4724	2.29315	395.328	315.529	10.15	0	9.17683	2482.81	10.6928	10.8983	1	2.05807	2.09762
07/04/2018 13:50	nan	-81.8465	-67.4014	12.632	-2.74992	0	33.2333	1.68418	2.29688	18.5024	2.33453	395.288	315.525	9.78	0	8.8423	2478.21	9.98948	10.1276	1	nan	nan
07/04/2018 14:00	0.327462	-81.7554	-67.3981	12.74	-2.85426	0	33.2268	1.734	2.37329	18.5316	2.38334	394.891	315.251	10.51	0	9.50231	2466.65	11.4469	11.7233	1	0.899623	0.921347
07/04/2018 14:10	0.76494	-81.6633	-67.3956	12.734	-3.34093	0	33.2243	1.71883	2.41626	18.5604	2.4436	394.484	314.966	9.79	0	8.85135	2460.18	10.045	10.1855	1	1.84412	1.86991
07/04/2018 14:20	nan	-81.5717	-67.3942	12.762	-2.71019	0	33.2157	1.76449	2.38336	18.5882	2.44592	394.392	314.913	10.19	0	9.21299	2465.13	10.8099	11.0237	1	nan	nan
07/04/2018 14:30	nan	-81.4808	-67.393	12.742	-3.31282	0	33.2243	1.78917	2.41024	18.6152	2.41886	394.719	315.139	10.08	0	9.11354	2461.08	10.6026	10.7959	1	nan	nan
07/04/2018 14:40	nan	-81.3903	-67.3914	12.488	-3.26762	0	33.2272	1.80457	2.45628	18.6489	2.48585	393.707	314.364	10.18	0	9.20395	2454.16	10.8142	11.0266	1	nan	nan
07/04/2018 14:50	0.979842	-81.3005	-67.3891	12.432	-3.26006	0	33.2278	1.80997	2.45783	18.6818	2.49547	393.526	314.224	9.76	0	8.82422	2453.93	10.0007	10.136	1	2.35179	2.38361
07/04/2018 15:00	1.18043	-81.2117	-67.3864	12.417	-2.28826	0	33.2276	1.82732	2.44755	18.7178	2.48885	393.908	314.526	9.84	0	8.89655	2455.47	10.1501	10.2996	1	2.87557	2.91792
07/04/2018 15:10	0.837988	-81.1228	-67.3831	12.167	-2.95592	0	33.2263	1.76005	2.45858	18.7521	2.493	393.857	314.49	10.26	0	9.27628	2453.82	10.9736	11.2014	1	2.20698	2.25279
07/04/2018 15:20	nan	-81.0346	-67.3798	12.288	-2.8847	0	33.2256	1.66027	2.38968	18.786	2.47525	394.227	314.777	10.5	0	9.49327	2464.18	11.4324	11.7069	1	nan	nan
07/04/2018 15:30	nan	-80.9466	-67.3765	12.216	-2.43893	0	33.2235	1.61643	2.21406	18.8205	2.2901	397.793	317.519	10.61	0	9.59272	2490.8	11.5942	11.8894	1	nan	nan
07/04/2018 15:40	0.685759	-80.8583	-67.3733	12.411	-2.49329	0	33.2242	1.62075	2.17558	18.8533	2.22273	398.92	318.377	11.14	0	10.0719	2496.68	12.6842	13.0915	1	2.0876	2.15462
07/04/2018 15:50	0.3955	-80.77	-67.3703	12.384	-2.36402	0	33.2223	1.69018	2.19107	18.8846	2.21712	399.222	318.619	10.94	0	9.89108	2494.31	12.2677	12.6316	1	1.16445	1.19899
07/04/2018 16:00	nan	-80.6816	-67.3672	12.253	-2.0983	0	33.2147	1.60627	2.27382	18.9138	2.28204	397.953	317.661	10.71	0	9.68314	2481.71	11.8204	12.1368	1	nan	nan
07/04/2018 16:10	0.278482	-80.5948	-67.3623	12.079	-1.83666	0	33.2239	1.62386	2.16763	18.9407	2.26384	398.043	317.702	9.86	0	8.91463	2497.9	10.1016	10.2533	1	0.675146	0.685289
07/04/2018 16:20	0.969521	-80.5087	-67.3562	12.141	-2.32265	0	33.2237	1.65371	2.16512	18.9621	2.19249	397.839	317.498	10.86	0	9.81876	2498.28	12.091	12.4376	1	2.8134	2.89405
07/04/2018 16:30	0.170457	-80.423	-67.3502	12.128	-1.93844	0	33.2179	1.65735	2.2352	18.9821	2.26059	397.396	317.197	11.59	0	10.4788	2487.58	13.6855	14.1964	1	0.55987	0.580767
07/04/2018 16:40	nan	-80.337	-67.3442	12.186	-1.37415	0	33.2093	1.66707	2.25298	19.0006	2.29358	397.657	317.443	11.09	0	10.0267	2484.87	12.6078	13.005	1	nan	nan
07/04/2018 16:50	2.22247	-80.2513	-67.3385	11.942	-1.34173	0	33.2072	1.66533	2.26269	19.0229	2.30999	397.314	317.184	11.22	0	10.1442	2483.4	12.8895	13.3156	1	6.87516	7.10245
07/04/2018 17:00	2.25942	-80.1661	-67.3326	12.12	-2.14876	0	33.2097	1.63831	2.26437	19.0456	2.31693	396.827	316.794	11.59	0	10.4788	2483.14	13.6978	14.209	1	7.42775	7.70499
07/04/2018 17:10	nan	-80.0806	-67.3268	12.058	-1.78347	0	33.2179	1.60664	2.21374	19.0644	2.27217	397.916	317.619	11.36	0	10.2708	2490.85	13.1724	13.6296	1	nan	nan
07/04/2018 17:20	0.650224	-79.995	-67.3213	12.015	-1.5747	0	33.2181	1.60803	2.20159	19.0839	2.26237	397.996	317.676	11.13	0	10.0629	2492.71	12.673	13.0784	1	1.97767	2.04093
07/04/2018 17:30	nan	-79.9103	-67.3161	11.999	-1.76599	0	33.2174	1.61563	2.18206	19.1003	2.21642	398.008	317.66	11.79	0	10.6596	2495.69	14.1089	14.6667	1	nan	nan
07/04/2018 17:40	nan	-79.8257	-67.3109	11.922	-0.751378	0	33.219	1.6299	2.21518	19.1164	2.25611	398.412	318.003	11.48	0	10.3793	2490.63	13.4349	13.9196	1	nan	nan
07/04/2018 17:50	1.37018	-79.7412	-67.3058	11.832	-1.39246	0	33.216	1.58881	2.23729	19.1319	2.28152	397.566	317.349	11.5	0	10.3974	2487.26	13.4879	13.9776	1	4.43539	4.59644
07/04/2018 18:00	1.7309	-79.6565	-67.301	12.002	-0.924381	0	33.2212	1.595	2.17587	19.1409	2.25736	398.408	317.996	12.34	0	11.1569	2496.64	15.368	16.0639	1	6.38414	6.67322
07/04/2018 18:10	nan	-79.5716	-67.2958	11.965	-1.41307	0	33.2183	1.59356	2.1731	19.1293	2.20664	398.601	318.126	12.2	0	11.0303	2497.06	15.0405	15.7002	1	nan	nan
07/04/2018 18:20	nan	-79.4861	-67.2906	12.325	-0.689059	0	33.2165	1.55371	2.24388	19.0924	2.28521	397.825	317.557	12.19	0	11.0212	2486.26	15.0499	15.7084	1	nan	nan
07/04/2018 18:30	nan	-79.4	-67.2854	12.29	-0.717928	0	33.2228	1.51982	2.22631	19.0482	2.29137	397.09	316.961	11.62	0	10.5059	2488.93	13.7483	14.2661	1	nan	nan
07/04/2018 18:40	0.0922066	-79.314	-67.2793	12.289	-0.676721	0	33.2333	1.48332	2.21228	18.9985	2.26935	396.704	316.616	12.19	0	11.0212	2491.07	15.0353	15.6933	1	0.332726	0.347285
07/04/2018 18:50	0.572447	-79.23	-67.2711	12.145	-1.49261	0	33.2389	1.41096	2.1927	18.9437	2.25058	395.841	315.905	12.43	0	11.2382	2494.06	15.5877	16.3075	1	2.14155	2.24044
07/04/2018 19:00	nan	-79.1454	-67.2628	12.173	-1.04209	0	33.236	1.4181	2.12238	18.8817	2.19695	396.473	316.383	13.43	0	12.1423	2504.83	17.9983	18.996	1	nan	nan
07/04/2018 19:10	0.954789	-79.0621	-67.253	12.152	-1.7486	0	33.2378	1.41094	2.15903	18.8147	2.18861	396.221	316.174	14.3	0	12.9289	2499.21	20.2919	21.561	1	4.64989	4.94069
07/04/2018 19:20	0.7478	-78.979	-67.2416	12.354	-0.453212	0	33.2352	1.40056	2.17711	18.7501	2.22679	396.127	316.127	14.32	0	12.947	2496.45	20.3571	21.6334	1	3.65352	3.88258
07/04/2018 19:30	nan	-78.8966	-67.2292	12.386	-0.573028	0	33.2421	1.38262	2.18021	18.6881	2.23346	395.593	315.69	14.41	0	13.0284	2495.97	20.6023	21.9082	1	nan	nan
07/04/2018 19:40	nan	-78.8154	-67.216	12.19	-0.737313	0	33.2407	1.39497	2.15001	18.6251	2.20133	395.891	315.912	15.52	0	14.032	2500.59	23.7002	25.3899	1	nan	nan
07/04/2018 19:50	1.3142	-78.7332	-67.2032	12.447	-1.22892	0	33.2395	1.37638	2.18524	18.5653	2.22122	395.551	315.655	15.37	0	13.8963	2495.2	23.2913	24.9284	1	7.34624	7.86258
07/04/2018 20:00	0.229011	-78.6488	-67.1915	12.713	-0.833481	0	33.2406	1.37888	2.17086	18.5185	2.22642	395.483	315.601	15.12	0	13.6703	2497.4	22.5661	24.1134	1	1.24029	1.32533
07/04/2018 20:10	nan	-78.564	-67.1792	12.852	-1.1232	0	33.2417	1.42593	2.14913	18.5159	2.1929	395.51	315.601	15.35	0	13.8783	2500.73	23.208	24.836	1	nan	nan
07/04/2018 20:20	nan	-78.4804	-67.1661	12.626	-0.593267	0	33.2411	1.47654	2.16352	18.5334	2.19861	395.642	315.711	15.44	0	13.9596	2498.52	23.4779	25.1392	1	nan	nan
07/04/2018 20:30	1.30972	-78.3976	-67.1526	12.573	-0.976987	0	33.2382	1.49996	2.18853	18.5594	2.23013	395.587	315.691	15.85	0	14.3303	2494.7	24.6982	26.5124	1	7.76346	8.33371
07/04/2018 20:40	nan	-78.3138	-67.1402	12.698	-0.953119	0	33.2463	1.53043	2.17504	18.5906	2.22432	395.552	315.643	15.47	0	13.9868	2496.76	23.5731	25.2459	1	nan	nan
07/04/2018 20:50	1.56035	-78.2281	-67.1287	12.614	-1.47888	0	33.2529	1.5697	2.15807	18.6281	2.2028	395.155	315.299	15.31	0	13.8421	2499.36	23.0994	24.7135	1	8.65035	9.25482
07/04/2018 21:00	0.181867	-78.1425	-67.1176	12.848	-1.35431	0	33.2481	1.59549	2.17677	18.6637	2.22422	395.303	315.44	15.59	0	14.0952	2496.5	23.9237	25.6404	1	1.04422	1.11915
07/04/2018 21:10	nan	-78.0573	-67.1069	12.628	-0.663318	0	33.2402	1.57077	2.19462	18.6775	2.23288	395.446	315.576	15.27	0	13.8059	2493.77	23.0105	24.6121	1	nan	nan
07/04/2018 21:20	1.45687	-77.9715	-67.0966	12.661	-0.27483	0	33.2408	1.57395	2.1896	18.6946	2.23869	395.605	315.705	14.94	0	13.5076	2494.54	22.071	23.5562	1	7.71708	8.23639
07/04/2018 21:30	0.649079	-77.8866	-67.0857	12.479	-0.625454	0	33.2445	1.51118	2.18847	18.6928	2.2364	395.561	315.661	15.26	0	13.7969	2494.71	22.9775	24.5753	1	3.57941	3.82831
07/04/2018 21:40	nan	-77.8034	-67.074	12.398	-0.608268	0	33.2523	1.49022	2.13677	18.6653	2.20542	395.295	315.414	15.27	0	13.8059	2502.62	22.9697	24.5685	1	nan	nan
07/04/2018 21:50	nan	-77.7217	-67.0618	12.302	-0.0880158	0	33.2437	1.47857	2.14131	18.6323	2.17837	395.464	315.551	16.55	0	14.9632	2501.93	26.7812	28.8641	1	nan	nan
07/04/2018 22:00	nan	-77.6418	-67.0484	12.252	-0.620695	0	33.2446	1.50772	2.15588	18.6357	2.2037	395.81	315.84	16.28	0	14.7191	2499.7	25.9653	27.9424	1	nan	nan
07/04/2018 22:10	nan	-77.56	-67.0366	12.343	-0.483156	0	33.2416	1.59529	2.06305	18.6638	2.13178	395.896	315.873	16.54	0	14.9542	2513.96	26.6862	28.7601	1	nan	nan
07/04/2018 22:20	nan	-77.4776	-67.026	12.12	0.536399	0	33.219	1.60462	2.13426	18.695	2.14974	396.796	316.65	15.91	0	14.3846	2503.01	24.8353	26.6691	1	nan	nan
07/04/2018 22:30	nan	-77.3968	-67.0144	12.055	0.0661818	0	33.2269	1.56414	2.14749	18.714	2.21524	396.838	316.706	16.1	0	14.5563	2500.98	25.414	27.3209	1	nan	nan
07/04/2018 22:40	nan	-77.3171	-67.0023	11.962	-0.152974	0	33.2444	1.57363	2.05199	18.7367	2.1074	396.171	316.072	16.52	0	14.9361	2515.66	26.6157	28.6809	1	nan	nan
07/04/2018 22:50	nan	-77.2365	-66.9907	12.108	0.205143	0	33.2409	1.57143	2.05241	18.7645	2.09647	395.793	315.771	16.27	0	14.7101	2515.6	25.8527	27.8197	1	nan	nan
07/04/2018 23:00	nan	-77.1565	-66.9778	12.223	0.084587	0	33.243	1.58565	2.04156	18.7915	2.08785	395.967	315.901	16.71	0	15.1079	2517.27	27.1944	29.335	1	nan	nan
07/04/2018 23:10	1.30608	-77.0765	-66.9643	12.552	0.0896924	0	33.238	1.59004	2.06434	18.816	2.09543	396.027	315.964	16.13	0	14.5835	2513.76	25.4394	27.3531	1	7.97423	8.57407
07/04/2018 23:20	nan	-76.9969	-66.9504	12.373	-0.14592	0	33.2391	1.5887	2.06685	18.8389	2.11379	396.068	316.005	16.59	0	14.9994	2513.37	26.8436	28.9376	1	nan	nan
07/04/2018 23:30	nan	-76.9172	-66.9364	12.367	-0.0344759	0	33.2341	1.55514	2.07937	18.8612	2.13612	395.745	315.771	16.8	0	15.1892	2511.44	27.5067	29.6863	1	nan	nan
07/04/2018 23:40	nan	-76.8376	-66.9226	12.146	-0.0536783	0	33.2439	1.58312	2.01316	18.8817	2.07745	395.86	315.807	16.36	0	14.7914	2521.66	26.0948	28.0945	1	nan	nan
07/04/2018 23:50	nan	-76.759	-66.9085	12.245	0.0876938	0	33.2385	1.58154	2.06044	18.9004	2.08358	395.618	315.63	17.07	0	15.4333	2514.36	28.3412	30.6304	1	nan	nan
08/04/2018 00:00	0.0948447	-76.6817	-66.8941	12.137	0.0791242	0	33.2359	1.57585	2.07218	18.9212	2.12558	395.974	315.944	15.55	0	14.0591	2512.55	23.7308	25.4274	1	0.540177	0.578797
08/04/2018 00:10	nan	-76.6055	-66.8796	12.066	-0.215029	0	33.2392	1.57643	2.05534	18.9404	2.11165	396.403	316.271	16.04	0	14.5021	2515.15	25.1626	27.0412	1	nan	nan
08/04/2018 00:20	0.391115	-76.5276	-66.8663	12.029	0.168173	0	33.2508	1.60503	2.05966	18.9602	2.10377	395.883	315.826	15.97	0	14.4388	2514.48	24.957	26.8092	1	2.34265	2.51652
08/04/2018 00:30	nan	-76.4501	-66.8533	12.174	-0.69559	0	33.2559	1.62961	2.08914	18.979	2.11384	394.998	315.115	16.36	0	14.7914	2509.94	26.1557	28.1601	1	nan	nan
08/04/2018 00:40	0.240508	-76.3695	-66.843	12.037	0.133672	0	33.2548	1.747	2.1166	18.9951	2.16113	394.166	314.481	15.78	0	14.267	2505.72	24.4369	26.2208	1	1.41054	1.51352
08/04/2018 00:50	nan	-76.2881	-66.8343	11.953	-0.58653	0	33.2493	1.75333	2.30061	19.012	2.29569	392.419	313.178	14.79	0	13.372	2477.64	21.7256	23.1641	1	nan	nan
08/04/2018 01:00	nan	-76.2068	-66.8259	11.828	-0.66214	0	33.2522	1.75679	2.30142	19.0299	2.36973	392.152	313.002	14.8	0	13.381	2477.52	21.7541	23.196	1	nan	nan
08/04/2018 01:10	nan	-76.1254	-66.8177	11.917	-0.463869	0	33.2586	1.83535	2.26071	19.0465	2.31564	392.598	313.313	15.17	0	13.7155	2483.7	22.7708	24.34	1	nan	nan
08/04/2018 01:20	nan	-76.0443	-66.8096	11.772	-0.723015	0	33.2546	1.90986	2.35129	19.0626	2.36834	392.021	312.892	15.23	0	13.7698	2469.97	23.006	24.601	1	nan	nan
08/04/2018 01:30	nan	-75.9639	-66.8015	12.01	-0.747891	0	33.2507	1.93032	2.46929	19.0781	2.49926	390.487	311.751	16	0	14.4659	2452.21	25.3624	27.2496	1	nan	nan
08/04/2018 01:40	0.0133355	-75.8847	-66.7933	11.629	0.264035	0	33.2511	1.94701	2.45974	19.0934	2.51802	390.436	311.72	16.13	0	14.5835	2453.64	25.7492	27.6861	1	0.0824106	0.0886097
08/04/2018 01:50	nan	-75.8055	-66.7852	11.456	-0.267266	0	33.2528	1.92214	2.4766	19.1076	2.5392	390.133	311.487	16.29	0	14.7281	2451.12	26.252	28.2526	1	nan	nan
08/04/2018 02:00	nan	-75.7264	-66.7766	11.502	0.226339	0	33.2496	1.90177	2.43874	19.1222	2.51715	391.013	312.184	15.79	0	14.2761	2456.8	24.7088	26.5142	1	nan	nan
08/04/2018 02:10	2.02244	-75.6496	-66.7661	11.703	-0.0835577	0	33.2499	1.90516	2.3994	19.1347	2.4746	391.872	312.844	16.63	0	15.0355	2462.71	27.2432	29.3749	1	13.2235	14.2582
08/04/2018 02:20	nan	-75.5728	-66.755	11.602	-0.164018	0	33.2508	1.92294	2.40602	19.1444	2.4642	392.214	313.109	16.7	0	15.0988	2461.72	27.4682	29.6287	1	nan	nan
08/04/2018 02:30	0.698232	-75.496	-66.7438	11.742	0.0292589	0	33.2501	1.93037	2.43762	19.1549	2.4989	391.514	312.572	17.63	0	15.9397	2456.96	30.4962	33.0525	1	5.11042	5.53879
08/04/2018 02:40	nan	-75.4192	-66.7331	11.708	0.219569	0	33.25	1.91177	2.45454	19.1626	2.51973	391.28	312.398	17.6	0	15.9125	2454.43	30.4127	32.9571	1	nan	nan
08/04/2018 02:50	nan	-75.3435	-66.7225	11.35	0.370564	0	33.25	1.87087	2.42916	19.1667	2.50082	391.837	312.832	18.84	0	17.0336	2458.23	34.6246	37.7354	1	nan	nan
08/04/2018 03:00	nan	-75.2675	-66.7118	11.497	-0.228573	0	33.2558	1.81938	2.38414	19.1716	2.47759	391.609	312.623	18.46	0	16.6901	2465.01	33.2516	36.1787	1	nan	nan
08/04/2018 03:10	2.05227	-75.191	-66.7014	11.601	-0.192583	0	33.2654	1.75934	2.31479	19.1755	2.40741	392.156	312.999	18.72	0	16.9251	2475.49	34.0833	37.1261	1	16.7875	18.2863
08/04/2018 03:20	1.0713	-75.1134	-66.6907	11.698	-0.159625	0	33.2637	1.71429	2.25203	19.1806	2.34912	392.324	313.103	18.26	0	16.5093	2485.02	32.433	35.2562	1	8.33892	9.06481
08/04/2018 03:30	nan	-75.0359	-66.6795	11.905	0.148141	0	33.258	1.74094	2.18844	19.1852	2.27246	393.889	314.319	18.27	0	16.5183	2494.71	32.4039	35.2262	1	nan	nan
08/04/2018 03:40	nan	-74.9612	-66.6663	11.813	0.0254267	0	33.2628	1.69492	2.23959	19.1878	2.29471	393.239	313.803	18.65	0	16.8619	2486.91	33.7614	36.7643	1	nan	nan
08/04/2018 03:50	nan	-74.8871	-66.6523	11.797	0.33715	0	33.2583	1.74973	2.19778	19.1894	2.29838	393.368	313.917	18.43	0	16.663	2493.29	32.9595	35.8561	1	nan	nan
08/04/2018 04:00	nan	-74.8116	-66.6396	11.709	0.686469	0	33.2595	1.79131	2.32285	19.1916	2.32135	393.902	314.355	17.62	0	15.9306	2474.27	30.3564	32.8993	1	nan	nan
08/04/2018 04:10	nan	-74.7338	-66.6296	11.823	-0.544855	0	33.2552	1.81967	2.44074	19.1937	2.49781	391.975	312.929	17.32	0	15.6594	2456.5	29.4813	31.9034	1	nan	nan
08/04/2018 04:20	1.54743	-74.6543	-66.6214	11.568	0.068862	0	33.2481	1.81787	2.48144	19.1999	2.54309	392.197	313.147	16.2	0	14.6468	2450.39	25.9799	27.9454	1	9.64852	10.3785
08/04/2018 04:30	nan	-74.5763	-66.6128	11.82	-0.00141011	0	33.2491	1.87901	2.4305	19.2073	2.50593	393.432	314.11	16.69	0	15.0898	2458.03	27.4573	29.6154	1	nan	nan
08/04/2018 04:40	nan	-74.4981	-66.6034	11.631	-0.175652	0	33.2544	1.84549	2.5265	19.2123	2.56621	392.215	313.161	16.77	0	15.1621	2443.66	27.7906	29.9878	1	nan	nan
08/04/2018 04:50	0.0112372	-74.4215	-66.5932	11.63	0.693113	0	33.2538	1.84376	2.47437	19.2173	2.57415	392.53	313.419	17.42	0	15.7498	2451.45	29.8384	32.306	1	0.080472	0.087127
08/04/2018 05:00	1.67837	-74.3466	-66.5827	11.3	0.166515	0	33.2521	1.86725	2.47453	19.2228	2.55086	392.946	313.741	17.79	0	16.0843	2451.43	31.0633	33.6931	1	12.5126	13.5719
08/04/2018 05:10	nan	-74.2734	-66.5712	11.337	0.15997	0	33.2491	1.89095	2.48933	19.2247	2.541	392.874	313.685	18.75	0	16.9523	2449.21	34.3711	37.4445	1	nan	nan
08/04/2018 05:20	0.67687	-74.1999	-66.5598	11.291	0.90033	0	33.249	1.9005	2.54813	19.2251	2.61904	392.19	313.184	19.16	0	17.323	2440.43	35.8926	39.1703	1	5.83071	6.36316
08/04/2018 05:30	nan	-74.1258	-66.5485	11.375	-0.219702	0	33.2533	1.84131	2.55193	19.2233	2.62259	392.019	313.04	18.87	0	17.0608	2439.86	34.861	37.9979	1	nan	nan
08/04/2018 05:40	nan	-74.051	-66.5375	11.363	0.0474434	0	33.2513	1.8324	2.48563	19.2209	2.59326	392.38	313.316	18.55	0	16.7714	2449.77	33.6674	36.6458	1	nan	nan
08/04/2018 05:50	1.09171	-73.9765	-66.5265	11.382	-0.0107398	0	33.2441	1.83552	2.45518	19.2173	2.52065	393.502	314.184	18.54	0	16.7624	2454.33	33.6013	36.5723	1	8.80391	9.58233
08/04/2018 06:00	0.602245	-73.9014	-66.5152	11.625	0.591292	0	33.2376	1.76919	2.50173	19.214	2.57353	392.867	313.722	18.3	0	16.5454	2447.36	32.8189	35.6823	1	4.74361	5.15747
08/04/2018 06:10	1.44801	-73.8272	-66.5041	11.432	-0.144166	0	33.246	1.72481	2.41101	19.211	2.52344	393.929	314.523	18.72	0	16.9251	2460.96	34.1837	37.2356	1	11.8796	12.9402
08/04/2018 06:20	1.24778	-73.7523	-66.4935	11.524	0.142299	0	33.2527	1.71686	2.34567	19.2045	2.43475	394.408	314.84	19.14	0	17.3049	2470.82	35.5998	38.8474	1	10.6609	11.6335
08/04/2018 06:30	nan	-73.6762	-66.4832	11.654	0.230053	0	33.2471	1.75092	2.35464	19.1979	2.4232	394.648	315.036	19.51	0	17.6394	2469.46	36.9436	40.375	1	nan	nan
08/04/2018 06:40	0.550834	-73.5999	-66.4728	11.553	0.541676	0	33.2405	1.7544	2.41006	19.1923	2.46988	394.297	314.797	18.66	0	16.8709	2461.11	33.9729	36.9962	1	4.49121	4.8909
08/04/2018 06:50	0.773437	-73.5235	-66.462	11.738	0.396464	0	33.2305	1.74053	2.4193	19.1864	2.49469	394.753	315.197	19.33	0	17.4767	2459.72	36.3634	39.7118	1	6.74994	7.3715
08/04/2018 07:00	nan	-73.4477	-66.451	11.667	1.06501	0	33.2305	1.71313	2.41175	19.1808	2.49566	395.241	315.588	18.87	0	17.0608	2460.85	34.712	37.8355	1	nan	nan
08/04/2018 07:10	0.198336	-73.3736	-66.4395	11.345	0.994963	0	33.2383	1.73294	2.36931	19.173	2.45763	395.387	315.666	20.47	0	18.5074	2467.25	40.5374	44.466	1	1.92961	2.11661
08/04/2018 07:20	nan	-73.3002	-66.4286	11.205	1.27781	0	33.2294	1.8672	2.38801	19.1632	2.44493	395.553	315.809	21.9	0	19.8003	2464.43	46.1983	50.9248	1	nan	nan
08/04/2018 07:30	nan	-73.227	-66.4181	11.27	0.476884	0	33.2075	1.96991	2.56921	19.1516	2.568	395.143	315.601	22.18	0	20.0534	2437.29	47.6079	52.5253	1	nan	nan
08/04/2018 07:40	nan	-73.1543	-66.4071	11.238	1.01564	0	33.1996	2.03041	2.73939	19.1372	2.78691	393.666	314.565	22.53	0	20.3698	2412.12	49.3245	54.4781	1	nan	nan
08/04/2018 07:50	nan	-73.0811	-66.396	11.619	1.61931	0	33.1997	2.05587	2.77791	19.1217	2.82862	393.678	314.599	21.7	0	19.6194	2406.46	45.9312	50.5975	1	nan	nan
08/04/2018 08:00	0.322671	-73.0076	-66.3851	11.434	1.11568	0	33.2002	2.02826	2.80139	19.109	2.86852	393.371	314.375	20.42	0	18.4622	2403.02	40.8827	44.8365	1	3.166	3.47218
08/04/2018 08:10	nan	-72.934	-66.3743	11.417	0.59772	0	33.204	1.99194	2.76229	19.0968	2.86084	393.544	314.501	19.76	0	17.8654	2408.75	38.3331	41.935	1	nan	nan
08/04/2018 08:20	nan	-72.8606	-66.3638	11.264	1.13325	0	33.2103	1.91009	2.71689	19.085	2.80251	394.159	314.946	20.3	0	18.3537	2415.43	40.3176	44.1971	1	nan	nan
08/04/2018 08:30	nan	-72.7874	-66.3536	11.284	0.880556	0	33.2185	1.93288	2.58839	19.0751	2.69114	394.634	315.243	20.95	0	18.9413	2434.44	42.6726	46.8886	1	nan	nan
08/04/2018 08:40	nan	-72.7139	-66.3433	11.305	1.18863	0	33.2094	1.935	2.63111	19.0684	2.67779	394.698	315.305	19.72	0	17.8293	2428.1	38.0316	41.5987	1	nan	nan
08/04/2018 08:50	1.30213	-72.641	-66.3329	11.259	1.49569	0	33.2154	1.93222	2.66907	19.0639	2.74883	393.941	314.729	21.32	0	19.2759	2422.48	44.2457	48.6791	1	13.8272	15.2127
08/04/2018 09:00	nan	-72.5684	-66.3225	10.954	0.993111	0	33.2301	1.93779	2.64443	19.0615	2.71361	392.755	313.73	21.21	0	19.1764	2426.13	43.7738	48.1419	1	nan	nan
08/04/2018 09:10	1.14675	-72.4966	-66.3114	11.119	0.478445	0	33.2329	1.93663	2.65068	19.06	2.71729	392.306	313.368	21.24	0	19.2035	2425.2	43.9016	48.2874	1	12.0826	13.2897
08/04/2018 09:20	0.307245	-72.425	-66.3005	11.326	-0.188066	0	33.2381	1.97419	2.64937	19.0599	2.71756	391.884	313.02	21.78	0	19.6918	2425.4	46.0775	50.7719	1	3.3977	3.74386
08/04/2018 09:30	nan	-72.3524	-66.2901	11.203	0.443102	0	33.2368	2.0049	2.68438	19.0622	2.73627	391.277	312.548	20.39	0	18.435	2420.22	40.622	44.5457	1	nan	nan
08/04/2018 09:40	nan	-72.2798	-66.2803	11.144	-0.409863	0	33.2402	1.98878	2.75555	19.0631	2.81875	389.992	311.563	21.06	0	19.0408	2409.74	43.3257	47.6245	1	nan	nan
08/04/2018 09:50	0.0549318	-72.2079	-66.2696	11.385	-0.724226	0	33.2403	1.99673	2.69696	19.0632	2.77411	390.71	312.11	21.5	0	19.4386	2418.36	45.007	49.5467	1	0.593357	0.653206
08/04/2018 10:00	0.542508	-72.1352	-66.2589	11.271	0.265009	0	33.2347	2.03743	2.68027	19.0611	2.74919	391.278	312.561	21.44	0	19.3844	2420.83	44.7424	49.2455	1	5.82555	6.41186
08/04/2018 10:10	1.20033	-72.063	-66.2481	11.002	0.0479849	0	33.2325	2.02845	2.73459	19.0621	2.78635	390.338	311.837	21.81	0	19.7189	2412.82	46.3202	51.0443	1	13.3439	14.7048
08/04/2018 10:20	nan	-71.9925	-66.2372	10.877	0.307077	0	33.2327	1.96473	2.72637	19.0627	2.80239	390.367	311.869	22.38	0	20.2342	2414.03	48.673	53.7338	1	nan	nan
08/04/2018 10:30	0.507502	-71.9222	-66.2268	10.918	-0.247153	0	33.247	2.03623	2.61951	19.0625	2.72098	391.183	312.443	22.36	0	20.2161	2429.82	48.4309	53.4633	1	5.89891	6.51186
08/04/2018 10:40	nan	-71.8531	-66.2176	10.458	-0.44504	0	33.2407	2.01751	2.72255	19.0638	2.72658	389.849	311.394	22.42	0	20.2704	2414.59	48.8354	53.9198	1	nan	nan
08/04/2018 10:50	nan	-71.785	-66.2078	10.957	-0.13662	0	33.2452	1.95259	2.88984	19.0613	2.94655	388.933	310.779	22.46	0	20.3066	2390.11	49.2542	54.3888	1	nan	nan
08/04/2018 11:00	0.237985	-71.7161	-66.1977	10.848	0.383386	0	33.2582	1.93623	2.78607	19.0588	2.8782	391.088	312.434	22.62	0	20.4512	2405.26	49.7766	54.9924	1	2.84307	3.14098
08/04/2018 11:10	nan	-71.6476	-66.1877	10.472	0.0208646	0	33.2493	1.84365	2.77339	19.0534	2.83619	391.766	312.971	22.45	0	20.2975	2407.12	49.0376	54.148	1	nan	nan
08/04/2018 11:20	1.12844	-71.5793	-66.1772	10.92	-0.0123552	0	33.2176	1.84064	2.67891	19.0472	2.79246	394.826	315.457	22.07	0	19.954	2421.03	47.3113	52.1799	1	12.8131	14.1317
08/04/2018 11:30	0.0932695	-71.5103	-66.1672	10.521	0.76769	0	33.219	1.79549	2.67536	19.0395	2.73286	396.214	316.528	22.23	0	20.0986	2421.55	47.9704	52.9335	1	1.0738	1.1849
08/04/2018 11:40	nan	-71.4405	-66.1574	10.848	0.480281	0	33.2218	1.80957	2.64004	19.0285	2.72659	396.54	316.779	23.04	0	20.8309	2426.78	51.3488	56.8001	1	nan	nan
08/04/2018 11:50	nan	-71.3714	-66.1471	10.923	0.873643	0	33.2354	1.80691	2.66122	19.0163	2.71859	396.008	316.32	23.04	0	20.8309	2423.64	51.382	56.8368	1	nan	nan
08/04/2018 12:00	nan	-71.3017	-66.1367	10.612	0.970032	0	33.2274	1.8085	2.67285	19.0031	2.73719	396.13	316.445	22.83	0	20.6411	2421.92	50.4986	55.8252	1	nan	nan
08/04/2018 12:10	0.100727	-71.2331	-66.125	11.007	-0.598773	0	33.2338	1.99028	2.6607	18.9892	2.72826	396.475	316.703	22.91	0	20.7134	2423.72	50.8223	56.1963	1	1.2286	1.35851
08/04/2018 12:20	nan	-71.1649	-66.1128	10.411	nan	0	33.2303	2.01592	2.90825	18.9753	2.87121	392.445	313.574	23.44	5	21.1926	2387.43	53.5219	59.2719	1	nan	nan
08/04/2018 12:30	nan	-71.0964	-66.1016	11.141	nan	0	33.2355	2.06308	2.94969	18.9601	3.04272	390.085	311.775	23.51	5	21.2559	2381.42	53.8994	59.7017	1	nan	nan
08/04/2018 12:40	nan	-71.0269	-66.0907	10.988	nan	0	33.2338	2.07686	2.82321	18.9439	2.88063	390.396	311.934	23.84	0	21.5542	2399.83	55.1598	61.1535	1	nan	nan
08/04/2018 12:50	nan	-70.9572	-66.0805	10.863	nan	0	33.2346	2.08961	2.8502	18.9291	2.89646	389.325	311.086	23.35	0	21.1112	2395.88	53.0314	58.7138	1	nan	nan
08/04/2018 13:00	nan	-70.8872	-66.0716	10.833	nan	0	33.2356	2.10179	2.82915	18.9193	2.87018	389.881	311.513	23.09	0	20.8762	2398.96	51.8625	57.3767	1	nan	nan
08/04/2018 13:10	nan	-70.8167	-66.0631	11.085	nan	0	33.2329	2.0919	2.85087	18.9143	2.89303	389.157	310.953	23.21	0	20.9847	2395.78	52.4195	58.013	1	nan	nan
08/04/2018 13:20	nan	-70.7464	-66.054	10.932	nan	0	33.2355	2.08432	2.82679	18.9129	2.87861	389.489	311.204	23.18	0	20.9575	2399.3	52.2502	57.8207	1	nan	nan
08/04/2018 13:30	nan	-70.6774	-66.0446	10.624	nan	0	33.233	2.07825	2.80739	18.9129	2.85198	389.982	311.589	22.88	0	20.6863	2402.14	50.921	56.3004	1	nan	nan
08/04/2018 13:40	nan	-70.6104	-66.0354	10.155	nan	0	33.2301	2.05575	2.79785	18.9145	2.84362	390.364	311.895	23.21	0	20.9847	2403.54	52.3349	57.9194	1	nan	nan
08/04/2018 13:50	nan	-70.5458	-66.0261	10.383	nan	0	33.2335	2.04832	2.79095	18.9147	2.83961	390.721	312.171	23.46	0	21.2107	2404.55	53.4191	59.1614	1	nan	nan
08/04/2018 14:00	nan	-70.4809	-66.0164	10.204	nan	0	33.234	2.08134	2.76062	18.9167	2.81177	390.879	312.28	23.56	0	21.3011	2409	53.8106	59.6117	1	nan	nan
08/04/2018 14:10	nan	-70.4174	-66.0069	9.817	nan	0	33.2297	2.08802	2.79927	18.9182	2.83384	390.88	312.303	23.67	0	21.4005	2403.33	54.3617	60.2405	1	nan	nan
08/04/2018 14:20	nan	-70.3527	-65.9976	9.947	nan	0	33.2232	2.0141	2.8414	18.9196	2.89409	389.94	311.6	23.5	0	21.2468	2397.17	53.6778	59.4546	1	nan	nan
08/04/2018 14:30	nan	-70.2904	-65.9888	9.92	nan	0	33.2154	2.00552	2.73043	18.9218	2.8265	391.697	312.982	23.76	0	21.4819	2413.43	54.6475	60.5723	1	nan	nan
08/04/2018 14:40	nan	-70.2271	-65.9791	10.284	nan	0	33.2093	2.04107	2.70819	18.9266	2.75561	392.958	313.961	24.37	0	22.0334	2416.71	57.3567	63.6792	1	nan	nan
08/04/2018 14:50	nan	-70.1636	-65.9692	9.917	-0.571255	0	33.1987	2.09235	2.75244	18.9378	2.78943	392.585	313.705	24.33	0	21.9973	2410.2	57.2517	63.556	1	nan	nan
08/04/2018 15:00	0.533419	-70.1005	-65.9598	9.889	0.225506	0	33.2045	2.15273	2.80585	18.9508	2.83722	391.729	313.036	23.79	0	21.509	2402.37	54.9071	60.8651	1	7.02925	7.79199
08/04/2018 15:10	nan	-70.0362	-65.9508	10.216	-0.219451	0	33.2193	2.17275	2.89397	18.9656	2.93013	390.258	311.883	22.85	0	20.6592	2389.51	50.9261	56.3012	1	nan	nan
08/04/2018 15:20	1.28373	-69.9709	-65.9418	10.094	-0.124687	0	33.2169	2.21105	2.89522	18.9812	2.95597	389.953	311.659	23.9	0	21.6085	2389.32	55.5504	61.5967	1	17.1148	18.9776
08/04/2018 15:30	0.497669	-69.9072	-65.9334	10.248	-0.0709581	0	33.2247	2.21167	2.92935	18.9936	2.95495	389.771	311.497	22.94	0	20.7405	2384.37	51.3698	56.8067	1	6.13563	6.78501
08/04/2018 15:40	0.176235	-69.8439	-65.9241	10.023	-0.0761454	0	33.2194	2.23747	2.93062	19.0031	2.99031	389.35	311.192	23.47	0	21.2197	2384.18	53.691	59.4642	1	2.27094	2.51512
08/04/2018 15:50	nan	-69.7815	-65.9143	10.192	-0.557076	0	33.2272	2.20656	2.95402	19.0136	2.99434	389.221	311.074	23.71	0	21.4367	2380.79	54.7971	60.7298	1	nan	nan
08/04/2018 16:00	nan	-69.7179	-65.904	10.207	0.0856231	0	33.2186	2.19365	2.92232	19.0182	2.9925	389.082	310.981	23.57	0	21.3101	2385.38	54.1207	59.9569	1	nan	nan
08/04/2018 16:10	0.0110688	-69.6541	-65.8939	9.363	-0.503748	0	33.2192	2.20856	2.90216	19.0263	2.95775	389.223	311.072	23.6	0	21.3373	2388.31	54.2207	60.0727	1	0.144038	0.159584
08/04/2018 16:20	nan	-69.5905	-65.8842	10.612	-0.305696	0	33.2259	2.22758	2.91818	19.0322	2.95974	388.843	310.756	23.32	0	21.0841	2385.99	53.0094	58.6843	1	nan	nan
08/04/2018 16:30	0.725366	-69.5251	-65.8744	10.26	-0.560611	0	33.2348	2.20128	2.95602	19.0353	2.99786	388.115	310.177	23.18	0	20.9575	2380.5	52.4562	58.0486	1	9.13198	10.1056
08/04/2018 16:40	nan	-69.4593	-65.8653	10.176	-0.251772	0	33.2351	2.17345	2.89973	19.0377	2.97246	387.723	309.848	22.88	0	20.6863	2388.67	51.0644	56.459	1	nan	nan
08/04/2018 16:50	nan	-69.3935	-65.8556	10.647	-0.911235	0	33.2321	2.16859	2.86363	19.0371	2.91472	388.551	310.483	23.47	0	21.2197	2393.92	53.5817	59.3431	1	nan	nan
08/04/2018 17:00	nan	-69.3273	-65.8455	10.37	-0.347471	0	33.2314	2.17234	2.8612	19.0375	2.90688	388.697	310.597	24.1	0	21.7893	2394.28	56.3951	62.567	1	nan	nan
08/04/2018 17:10	nan	-69.2626	-65.836	10.321	-0.441631	0	33.2314	2.19784	2.87589	19.0366	2.91902	388.492	310.439	23.96	0	21.6627	2392.14	55.7878	61.8699	1	nan	nan
08/04/2018 17:20	0.59365	-69.1975	-65.8263	9.976	-0.361814	0	33.2363	2.23323	2.91001	19.0305	2.93595	388.564	310.497	24.05	0	21.7441	2387.17	56.2524	62.4004	1	8.01463	8.89056
08/04/2018 17:30	nan	-69.1313	-65.8164	10.237	-0.367649	0	33.2401	2.25037	2.95644	19.0251	2.99381	387.612	309.761	23.84	0	21.5542	2380.44	55.384	61.4021	1	nan	nan
08/04/2018 17:40	nan	-69.0666	-65.807	10.203	-0.623953	0	33.2417	2.22448	2.9722	19.021	3.01884	387.486	309.672	24.27	0	21.943	2378.16	57.3612	63.6676	1	nan	nan
08/04/2018 17:50	0.762698	-69.0009	-65.7973	10.514	-0.705137	0	33.2408	2.20803	2.94652	19.0107	3.00449	387.717	309.85	23.64	0	21.3734	2381.87	54.4721	60.3579	1	9.97099	11.0484
08/04/2018 18:00	nan	-68.9354	-65.7876	10.849	-0.666437	0	33.2392	2.21447	2.91632	19.0001	2.96737	387.919	309.993	24.11	0	21.7984	2386.26	56.5352	62.7241	1	nan	nan
08/04/2018 18:10	0.137512	-68.8682	-65.7774	10.754	0.297371	0	33.2361	2.24687	2.93293	18.986	2.9717	388.229	310.25	24.01	0	21.7079	2383.85	56.1106	62.2364	1	1.85181	2.05398
08/04/2018 18:20	nan	-68.8008	-65.767	10.76	0.565709	0	33.2372	2.23239	2.98551	18.9733	3.01463	388.321	310.345	23.84	0	21.5542	2376.23	55.433	61.4564	1	nan	nan
08/04/2018 18:30	nan	-68.7348	-65.7572	10.3	0.101123	0	33.2367	2.2231	2.984	18.962	3.03776	388.458	310.469	23.81	0	21.5271	2376.45	55.2955	61.299	1	nan	nan
08/04/2018 18:40	0.0051909	-68.668	-65.7475	10.567	0.125447	0	33.2204	2.25557	2.94487	18.9532	2.99264	389.377	311.213	23.03	0	20.8219	2382.11	51.7844	57.2803	1	0.0645138	0.0713607
08/04/2018 18:50	0.719273	-68.6013	-65.7378	10.525	0.213149	0	33.2232	2.22987	3.01723	18.9454	3.04268	389.787	311.563	23.54	0	21.283	2371.65	54.1436	59.9773	1	9.34658	10.3536
08/04/2018 19:00	0.446161	-68.5353	-65.7279	10.464	0.428263	0	33.2076	2.21129	2.97729	18.9399	3.04171	389.943	311.72	23.49	0	21.2378	2377.42	53.856	59.6502	1	5.76682	6.38726
08/04/2018 19:10	nan	-68.4675	-65.7195	10.684	0.612137	0	33.1945	2.20686	2.93692	18.9384	2.98827	391.235	312.75	23.08	0	20.8671	2383.27	51.9894	57.5154	1	nan	nan
08/04/2018 19:20	nan	-68.3996	-65.7111	10.462	0.129869	0	33.1996	2.22011	2.93528	18.937	2.9817	391.291	312.78	23.64	0	21.3734	2383.5	54.4535	60.3373	1	nan	nan
08/04/2018 19:30	0.856292	-68.3326	-65.7021	10.759	0.74916	0	33.2033	2.33042	2.93469	18.9359	2.97176	391.243	312.728	23.21	0	20.9847	2383.59	52.5534	58.1612	1	10.8003	11.9527
08/04/2018 19:40	0.724689	-68.2644	-65.6925	10.598	0.440355	0	33.2465	2.36748	3.0972	18.938	3.09353	390.258	311.92	23.05	0	20.84	2360.15	52.1122	57.6463	1	9.06363	10.0261
08/04/2018 19:50	nan	-68.1992	-65.6816	10.511	0.856284	0	33.2609	2.38781	3.12822	18.9411	3.16508	390.511	312.133	23.28	0	21.0479	2355.7	53.1722	58.8579	1	nan	nan
08/04/2018 20:00	0.687513	-68.1351	-65.6703	10.077	0.229654	0	33.266	2.39643	3.13598	18.9442	3.17741	390.159	311.847	24.73	0	22.3589	2354.59	59.7822	66.4338	1	9.86425	10.9618
08/04/2018 20:10	nan	-68.0693	-65.6605	10.551	0.218245	0	33.2643	2.44523	3.13942	18.9428	3.17665	389.829	311.587	24.01	0	21.7079	2354.1	56.464	62.6283	1	nan	nan
08/04/2018 20:20	0.546703	-68.0027	-65.6508	10.517	0.232873	0	33.2455	2.44174	3.20771	18.9478	3.23707	389	310.999	24.02	0	21.717	2344.36	56.6268	62.8106	1	7.42993	8.24129
08/04/2018 20:30	nan	-67.9366	-65.6407	10.549	0.510772	0	33.2424	2.41242	3.18986	18.9498	3.23847	388.678	310.748	23.29	0	21.057	2346.9	53.3161	59.0188	1	nan	nan
08/04/2018 20:40	0.228437	-67.8702	-65.6305	10.628	0.885903	0	33.2666	2.40552	3.14317	18.9551	3.20527	389.756	311.54	23.19	0	20.9666	2353.56	52.7995	58.4302	1	2.89472	3.20343
08/04/2018 20:50	nan	-67.8036	-65.6202	10.531	1.33066	0	33.27	2.41049	3.13642	18.9624	3.18122	390.201	311.875	23.04	0	20.8309	2354.53	52.1306	57.6649	1	nan	nan
08/04/2018 21:00	0.0999208	-67.7374	-65.6094	10.891	0.515326	0	33.2735	2.41789	3.13512	18.9703	3.17659	390.034	311.732	22.23	0	20.0986	2354.72	48.6465	53.6795	1	1.16659	1.28729
08/04/2018 21:10	nan	-67.6708	-65.5993	10.564	0.483876	0	33.2617	2.37254	3.16443	18.9834	3.20284	389.644	311.46	22.8	0	20.614	2350.53	51.1298	56.5179	1	nan	nan
08/04/2018 21:20	2.50789	-67.6039	-65.5895	11.071	1.65517	0	33.2611	2.37816	3.09922	18.9872	3.16106	393.699	314.678	22.14	0	20.0172	2359.86	48.2144	53.1877	1	29.0199	32.0133
08/04/2018 21:30	0.690529	-67.5368	-65.5792	10.838	1.7605	0	33.2599	2.36923	3.09936	18.9922	3.1436	393.49	314.503	21.55	0	19.4838	2359.84	45.7663	50.3909	1	7.58471	8.35113
08/04/2018 21:40	1.38203	-67.4708	-65.5687	10.677	1.92825	0	33.2604	2.35194	3.08959	19.0009	3.13458	395.354	315.987	23.74	0	21.4638	2361.24	55.1582	61.135	1	18.2953	20.2777
08/04/2018 21:50	1.97489	-67.4054	-65.559	10.591	1.92578	0	33.2688	2.38195	3.07808	19.0043	3.12098	395.294	315.913	22.97	0	20.7677	2362.89	51.7331	57.2136	1	24.5201	27.1177
08/04/2018 22:00	1.07182	-67.3415	-65.5504	10.008	1.89077	0	33.2539	2.42707	3.11938	19.0062	3.13758	395.237	315.909	23	0	20.7948	2356.97	51.9289	57.4351	1	13.3581	14.7745
08/04/2018 22:10	1.01894	-67.2803	-65.5409	9.995	2.08516	0	33.2503	2.44794	3.19643	19.007	3.22077	392.963	314.147	24.02	0	21.717	2345.96	56.6074	62.7891	1	13.8431	15.3548
08/04/2018 22:20	0.375414	-67.2212	-65.5315	9.936	1.51137	0	33.2321	2.43318	3.21631	19.0042	3.25785	393.157	314.362	24.24	0	21.9159	2343.14	57.6501	63.9831	1	5.19423	5.76484
08/04/2018 22:30	nan	-67.1625	-65.5224	8.976	2.04787	0	33.2274	2.43392	3.18716	18.9983	3.23362	396.131	316.736	24.41	0	22.0696	2347.29	58.3838	64.8263	1	nan	nan
08/04/2018 22:40	0.142099	-67.1054	-65.5142	9.154	2.04323	0	33.2236	2.42082	3.18388	18.9883	3.22375	395.955	316.597	25.24	0	22.82	2347.75	62.2848	69.3029	1	2.12415	2.3635
08/04/2018 22:50	0.198164	-67.0505	-65.5065	8.834	1.15064	0	33.176	2.40003	3.19254	18.9742	3.23607	393.839	315.014	24.58	0	22.2233	2346.52	59.1834	65.7432	1	2.81473	3.12671
08/04/2018 23:00	nan	-66.9956	-65.4982	9.015	1.80667	0	33.1751	2.4466	3.15776	18.9657	3.20136	394.636	315.633	25.38	0	22.9466	2351.48	62.9064	70.0183	1	nan	nan
08/04/2018 23:10	2.41215	-66.9415	-65.4897	8.756	1.66734	0	33.2348	2.48326	3.22828	18.9528	3.2395	393.31	314.468	25.85	0	23.3715	2341.43	65.3247	72.7912	1	37.8174	42.1399
08/04/2018 23:20	nan	-66.8903	-65.4816	8.576	1.45838	0	33.2568	2.43084	3.29905	18.9375	3.33462	391.631	313.134	25.16	0	22.7477	2331.4	62.1195	69.1054	1	nan	nan
08/04/2018 23:30	0.428991	-66.8386	-65.4728	8.502	2.00669	0	33.1765	2.40866	3.2115	18.9146	3.27612	395.487	316.355	24.65	0	22.2866	2343.82	59.5446	66.1562	1	6.13058	6.8113
08/04/2018 23:40	0.478065	-66.7877	-65.4646	7.887	1.86376	0	33.1696	2.3919	3.19408	18.8981	3.24475	396.348	317.039	25.83	0	23.3534	2346.3	65.159	72.6032	1	7.47606	8.33018
08/04/2018 23:50	0.941905	-66.7377	-65.4572	7.838	1.99295	0	33.1623	2.41428	3.17049	18.8749	3.21407	397.176	317.7	25.96	0	23.471	2349.66	65.7495	73.2834	1	14.8632	16.5662
09/04/2018 00:00	0.489254	-66.6898	-65.4504	7.702	2.92301	0	33.1886	2.46234	3.21632	18.8515	3.24	398.705	318.882	26.78	0	24.2124	2343.13	69.9374	78.0947	1	8.21211	9.16995
09/04/2018 00:10	nan	-66.6419	-65.4433	8.138	2.38816	0	33.2211	2.45209	3.30537	18.8293	3.32507	396.952	317.459	25.75	0	23.2811	2330.51	64.9873	72.3983	1	nan	nan
09/04/2018 00:20	nan	-66.5949	-65.4363	6.913	1.8065	0	33.2056	2.42919	3.30007	18.8044	3.35018	395.41	316.273	26.72	0	24.1581	2331.26	69.8106	77.943	1	nan	nan
09/04/2018 00:30	1.35814	-66.5537	-65.4296	6.332	2.0022	0	33.2032	2.42023	3.24992	18.7713	3.29288	401.623	321.214	25.71	0	23.245	2338.36	64.6827	72.0522	1	21.0836	23.4857
09/04/2018 00:40	2.33695	-66.5228	-65.4194	5.197	3.10522	0	33.2186	2.42824	3.25346	18.7435	3.2774	406.968	325.447	25.01	0	22.6121	2337.86	61.3189	68.1895	1	34.3918	38.2453
09/04/2018 00:50	nan	-66.4946	-65.4086	5.851	3.42646	0	33.2237	2.43715	3.27782	18.716	3.30228	412.365	329.766	26.45	0	23.914	2334.4	68.4015	76.3242	1	nan	nan
09/04/2018 01:00	0.957756	-66.4654	-65.3969	6.085	3.19617	0	33.2147	2.43032	3.28449	18.6917	3.31745	410.779	328.527	26.76	0	24.1943	2333.46	69.9806	78.1396	1	16.0858	17.9613
09/04/2018 01:10	0.731156	-66.4375	-65.3854	5.854	3.61078	0	33.2126	2.42443	3.28176	18.6635	3.31517	411.504	329.11	27.87	0	25.1979	2333.85	75.7238	84.7494	1	13.2878	14.8716
09/04/2018 01:20	0.00124054	-66.4108	-65.3748	5.86	3.01156	0	33.214	2.41874	3.27689	18.6401	3.31111	410.846	328.578	28.07	0	25.3787	2334.54	76.7724	85.9574	1	0.0228574	0.025592
09/04/2018 01:30	1.71947	-66.3843	-65.3634	5.742	4.27722	0	33.2156	2.42389	3.27711	18.6132	3.30335	424.489	339.481	26.94	0	24.357	2334.5	70.8817	79.1766	1	29.2509	32.6739
09/04/2018 01:40	0.775918	-66.3582	-65.3519	5.121	3.16471	0	33.2155	2.43441	3.29386	18.5886	3.32179	410.416	328.237	26.73	0	24.1672	2332.13	69.8482	77.9866	1	13.0071	14.5227
09/04/2018 01:50	0.924305	-66.3306	-65.3399	5.89	3.15194	0	33.2295	2.43503	3.30392	18.5688	3.33053	408.802	326.921	27.39	0	24.7639	2330.71	73.2591	81.9103	1	16.2513	18.1704
09/04/2018 02:00	0.476053	-66.3054	-65.3284	6.141	2.84024	0	33.2439	2.45399	3.30436	18.549	3.32948	409.389	327.358	25.24	0	22.82	2330.65	62.5129	69.5567	1	7.14227	7.94704
09/04/2018 02:10	0.299259	-66.2778	-65.3165	6.692	3.67684	0	33.2535	2.45764	3.32493	18.5324	3.34791	415.497	332.232	27.09	0	24.4926	2327.74	71.7542	80.1769	1	5.15355	5.75849
09/04/2018 02:20	nan	-66.2499	-65.3054	5.694	3.32872	0	33.2678	2.44245	3.33613	18.5113	3.37098	415.382	332.122	27.39	0	24.7639	2326.16	73.3307	81.9904	1	nan	nan
09/04/2018 02:30	1.04732	-66.2233	-65.2942	5.937	3.59492	0	33.2627	2.43502	3.35253	18.4922	3.37872	411.904	329.357	26.41	0	23.8778	2323.85	68.3556	76.2661	1	17.1816	19.17
09/04/2018 02:40	nan	-66.1971	-65.2838	5.58	4.86831	0	33.2628	2.44834	3.31233	18.4743	3.35166	456.799	365.236	27.66	0	25.008	2329.52	74.688	83.5545	1	nan	nan
09/04/2018 02:50	0.959593	-66.1726	-65.2744	4.799	4.29396	0	33.2872	2.46009	3.32292	18.4546	3.34334	428.383	342.455	27.12	0	24.5198	2328.03	71.9042	80.3497	1	16.5597	18.5047
09/04/2018 03:00	0.615496	-66.1506	-65.2658	4.91	4.58737	0	33.2934	2.45775	3.34347	18.4369	3.37316	428.797	342.791	26.44	0	23.905	2325.13	68.4876	76.4185	1	10.1169	11.2885
09/04/2018 03:10	1.89817	-66.1255	-65.2552	6.073	3.97674	0	33.2934	2.4557	3.33978	18.4204	3.36974	420.35	336.035	25.91	0	23.4258	2325.65	65.8414	73.3773	1	29.9947	33.4277
09/04/2018 03:20	nan	-66.0982	-65.2438	6.511	3.44994	0	33.2925	2.4588	3.32909	18.4035	3.36349	411.148	328.678	28.07	0	25.3787	2327.16	76.8941	86.0936	1	nan	nan
09/04/2018 03:30	nan	-66.0694	-65.2325	6.188	3.98889	0	33.2909	2.40846	3.33669	18.3877	3.36837	419.544	335.396	26.01	0	23.5162	2326.08	66.3291	73.9379	1	nan	nan
09/04/2018 03:40	0.975938	-66.0392	-65.2205	6.197	3.84312	0	33.2981	2.38184	3.26761	18.3671	3.32891	419.606	335.405	26.44	0	23.905	2335.85	68.3302	76.2429	1	16.0047	17.858
09/04/2018 03:50	0.962127	-66.0109	-65.2092	5.944	2.50363	0	33.318	2.35651	3.22565	18.3472	3.26091	408.301	326.284	28.08	0	25.3877	2341.81	76.7063	85.8851	1	17.7123	19.8318
09/04/2018 04:00	0.45349	-65.9802	-65.1976	7.064	1.64218	0	33.3123	2.34742	3.20741	18.3275	3.24502	408.325	326.306	27.9	0	25.225	2344.4	75.7113	84.7406	1	8.24024	9.22296
09/04/2018 04:10	2.15115	-65.9502	-65.1855	6.281	2.06979	0	33.3078	2.34248	3.14797	18.3013	3.20313	406.391	324.746	26.33	0	23.8055	2352.88	67.5338	75.3357	1	34.8661	38.894
09/04/2018 04:20	1.0215	-65.9188	-65.172	6.808	1.90829	0	33.3131	2.36966	3.12659	18.2528	3.1599	408.027	326.015	23	0	20.7948	2355.94	51.9403	57.4477	1	12.7337	14.0839
09/04/2018 04:30	0.223976	-65.8876	-65.1589	6.692	1.90458	0	33.3112	2.36148	3.1705	18.1896	3.18868	405.898	324.335	22.62	0	20.4512	2349.66	50.3621	55.6393	1	2.70718	2.99085
09/04/2018 04:40	1.64794	-65.8561	-65.1453	6.994	2.67379	0	33.3078	2.34911	3.18541	18.1219	3.22156	408.916	326.774	22.97	0	20.7677	2347.53	51.9021	57.4004	1	20.5276	22.7022
09/04/2018 04:50	0.676811	-65.8234	-65.1305	7.424	2.79115	0	33.305	2.29968	3.17714	18.0474	3.21581	412.065	329.293	23.71	0	21.4367	2348.71	55.17	61.143	1	8.96152	9.93175
09/04/2018 05:00	0.624453	-65.7893	-65.116	6.769	1.16331	0	33.3234	2.26939	3.12384	17.9777	3.18096	399.491	319.185	24.43	0	22.0877	2356.33	58.3641	64.8079	1	8.74695	9.71267
09/04/2018 05:10	0.381559	-65.756	-65.1032	7.072	0.107071	0	33.2996	2.20504	3.10292	17.9044	3.14642	398.256	318.229	23.66	0	21.3915	2359.33	54.8214	60.7483	1	5.02023	5.56298
09/04/2018 05:20	2.36883	-65.7208	-65.089	7.124	0.81755	0	33.2047	2.10059	3.03842	17.8321	3.09965	400.394	320.115	24.26	0	21.934	2368.6	57.431	63.7434	1	32.6507	36.2394
09/04/2018 05:30	0.499237	-65.6866	-65.0748	6.896	0.336547	0	33.0865	2.05987	2.93054	17.7606	3.00441	399.441	319.552	22.54	0	20.3789	2384.19	49.6551	54.8449	1	5.94952	6.57134
09/04/2018 05:40	0.734944	-65.6551	-65.0614	7.143	1.15428	0	33.0744	2.05214	2.89817	17.6898	2.94061	407.703	326.15	22.77	0	20.5868	2388.9	50.5887	55.9148	1	8.92316	9.86261
09/04/2018 05:50	1.06345	-65.6236	-65.049	7.154	1.7977	0	33.1036	2.01286	2.91451	17.6211	2.95159	416.496	333.125	22.83	0	20.6411	2386.52	50.8718	56.2378	1	12.9839	14.3534
09/04/2018 06:00	0.948601	-65.5914	-65.0358	7.019	1.43448	0	33.0928	1.97206	2.88096	17.5476	2.94176	414.254	331.35	23.42	0	21.1745	2391.4	53.3893	59.1217	1	12.1548	13.4599
09/04/2018 06:10	0.441334	-65.5581	-65.0221	7.327	1.23447	0	33.0818	1.93344	2.84487	17.4796	2.89278	410.16	328.07	23.98	0	21.6808	2396.66	55.8252	61.9147	1	5.91301	6.55802
09/04/2018 06:20	0.912943	-65.5234	-65.0079	6.984	1.02463	0	33.0904	1.92681	2.80068	17.411	2.85342	408.264	326.511	24.27	0	21.943	2403.12	57.0625	63.336	1	12.5027	13.8773
09/04/2018 06:30	1.96321	-65.4904	-64.9942	7.4	0.359811	0	33.1768	1.94741	2.80741	17.3413	2.84582	404.694	323.463	24.61	0	22.2504	2402.14	58.6326	65.1363	1	27.6259	30.6903
09/04/2018 06:40	1.7253	-65.4571	-64.9797	6.913	1.21251	0	33.2818	2.0223	2.84832	17.2737	2.87853	409.692	327.245	24.59	0	22.2323	2396.16	58.6134	65.1116	1	24.2702	26.961
09/04/2018 06:50	1.58409	-65.4247	-64.9656	6.177	0.439899	0	33.3448	2.06185	2.95715	17.2069	2.95917	402.34	321.284	25.48	0	23.037	2380.33	63.0024	70.1421	1	23.9524	26.6668
09/04/2018 07:00	nan	-65.3975	-64.9528	7.332	0.528857	0	33.3301	2.07144	3.01631	17.1411	3.05563	406.135	324.404	22.41	0	20.2614	2371.78	49.2318	54.3557	1	nan	nan
09/04/2018 07:10	1.15207	-65.3688	-64.9387	6.974	2.46847	0	33.3194	2.06248	3.0208	17.0758	3.06537	411.77	328.934	23.16	0	20.9394	2371.14	52.472	58.0628	1	14.5083	16.0541
09/04/2018 07:20	1.15642	-65.3385	-64.9245	7.32	2.13846	0	33.3182	2.06357	3.00516	17.012	3.0537	415.403	331.832	23.15	0	20.9304	2373.39	52.4033	57.9851	1	14.544	16.0932
09/04/2018 07:30	1.06695	-65.3071	-64.9103	7.327	1.85574	0	33.3195	2.06147	3.0011	16.9511	3.04417	405.313	323.764	24.04	0	21.7351	2373.98	56.3632	62.5215	1	14.4328	16.0097
09/04/2018 07:40	1.00149	-65.2753	-64.8962	6.932	1.8193	0	33.3161	2.06179	3.00826	16.8917	3.05473	405.575	323.986	22.94	0	20.7405	2372.95	51.4932	56.9432	1	12.3768	13.6867
09/04/2018 07:50	2.00508	-65.2465	-64.8829	5.772	2.19407	0	33.2976	2.06806	3.01092	16.8333	3.05688	403.812	322.619	21.96	0	19.8545	2372.56	47.3335	52.1861	1	22.7777	25.1129
09/04/2018 08:00	1.05569	-65.2202	-64.8698	6.63	3.73269	0	33.2912	2.06622	3.02257	16.7752	3.06339	425.787	340.195	23.99	0	21.6899	2370.88	56.1732	62.3024	1	14.2324	15.7853
09/04/2018 08:10	2.07671	-65.194	-64.8559	7.159	2.98805	0	33.2885	2.06176	3.01578	16.7168	3.06944	415.673	332.124	24.47	0	22.1238	2371.86	58.3573	64.8071	1	29.0858	32.3004
09/04/2018 08:20	1.09507	-65.1643	-64.841	6.236	2.15857	0	33.2899	2.0585	3.00892	16.6655	3.05577	409.571	327.237	24.56	0	22.2052	2372.85	58.7614	65.271	1	15.4434	17.1543
09/04/2018 08:30	1.80975	-65.1352	-64.8274	6.894	2.45733	0	33.2842	2.0376	3.01155	16.6118	3.05823	407.814	325.847	24.08	0	21.7712	2372.47	56.5628	62.7497	1	24.5675	27.2547
09/04/2018 08:40	0.304248	-65.1039	-64.813	7.569	2.01286	0	33.2881	2.03388	2.98816	16.5597	3.03854	406.872	325.075	26.02	0	23.5252	2375.85	65.6797	73.2157	1	4.79589	5.34617
09/04/2018 08:50	1.84266	-65.0726	-64.7989	6.988	1.66016	0	33.2931	2.04326	2.99093	16.5123	3.03835	396.234	316.564	26.23	0	23.7151	2375.45	66.7178	74.4085	1	29.5051	32.9063
09/04/2018 09:00	2.82145	-65.0427	-64.7856	5.985	1.11553	0	33.2955	2.06475	2.99893	16.4653	3.03642	403.153	322.086	24.02	0	21.717	2374.29	56.2687	62.4134	1	38.1022	42.2631
09/04/2018 09:10	1.66495	-65.0149	-64.7721	6.933	1.42336	0	33.3053	2.08268	3.03266	16.4187	3.06378	402.377	321.46	24.95	0	22.5578	2369.43	60.6262	67.4091	1	24.2255	26.9358
09/04/2018 09:20	2.54528	-64.986	-64.7576	7.477	1.21067	0	33.3156	2.08033	3.06109	16.3755	3.09734	405.662	324.083	25.27	0	22.8471	2365.33	62.196	69.2091	1	37.9934	42.2775
09/04/2018 09:30	2.29137	-64.9572	-64.7437	7.272	1.14206	0	33.3086	2.0746	3.04607	16.3351	3.10055	398.711	318.547	24.02	0	21.717	2367.49	56.3494	62.5029	1	30.9881	34.3721
09/04/2018 09:40	0.953688	-64.9292	-64.7301	6.453	1.97534	0	33.3027	2.06827	3.04158	16.2963	3.08376	410.114	327.66	25.06	0	22.6573	2368.14	61.1618	68.0232	1	13.999	15.5695
09/04/2018 09:50	2.13772	-64.9007	-64.717	6.654	1.71735	0	33.3101	2.07946	3.03943	16.2579	3.08225	409.385	327.06	22.9	0	20.7044	2368.45	51.3685	56.7986	1	26.3547	29.1406
09/04/2018 10:00	1.28826	-64.87	-64.7036	7.187	2.28334	0	33.3206	2.08006	3.05082	16.2198	3.0934	409.26	326.943	23.07	0	20.8581	2366.81	52.1261	57.665	1	16.1165	17.829
09/04/2018 10:10	1.33483	-64.8368	-64.6881	7.606	2.01647	0	33.3218	2.10971	3.0606	16.1841	3.10123	409.049	326.778	22.75	0	20.5688	2365.4	50.753	56.093	1	16.2592	17.9699
09/04/2018 10:20	1.25308	-64.8065	-64.6736	6.312	1.64394	0	33.3371	2.10778	3.09264	16.1506	3.12067	401.785	320.952	24.34	0	22.0063	2360.8	57.8936	64.2703	1	17.4109	19.3286
09/04/2018 10:30	1.35596	-64.7763	-64.6594	7.515	2.19839	0	33.3526	2.11155	3.0938	16.1199	3.14187	406.269	324.514	24	0	21.6989	2360.64	56.3403	62.4895	1	18.3348	20.3359
09/04/2018 10:40	0.91621	-64.7474	-64.6449	7.143	2.50987	0	33.353	2.11089	3.08307	16.0876	3.12079	411.627	328.779	23.28	0	21.0479	2362.18	53.0993	58.7772	1	11.676	12.9245
09/04/2018 10:50	1.33391	-64.7178	-64.6299	7.226	2.07202	0.475	33.3481	2.1017	3.08614	16.0589	3.12607	405.49	323.891	22.87	0	20.6772	2361.73	51.3114	56.7304	0.99525	16.3487	18.0753
09/04/2018 11:00	1.18359	-64.6839	-64.6141	7.849	2.72576	1.28182	33.3513	2.06149	3.07315	16.0387	3.11392	409.004	326.684	21.45	0	19.3934	2363.6	45.3215	49.8846	0.987182	12.709	13.9886
09/04/2018 11:10	1.59026	-64.6536	-64.5999	7.351	1.80253	1.88095	33.3629	2.00265	3.02711	16.023	3.08662	403.161	321.975	24.39	0	22.0515	2370.23	58.0084	64.4062	0.98119	21.7231	24.119
09/04/2018 11:20	2.57089	-64.6237	-64.5854	7.099	1.75945	3.55909	33.3661	1.98246	2.95496	16.0401	3.01992	414.156	330.708	24.14	0	21.8255	2380.65	56.7382	62.9543	0.964409	33.7622	37.4612
09/04/2018 11:30	1.20253	-64.5941	-64.5705	7.897	0.656473	3.584	33.367	2.00409	2.9062	16.087	2.95331	403.985	322.545	23.14	0	20.9214	2387.73	52.2021	57.7608	0.96416	14.5259	16.0727
09/04/2018 11:40	2.08156	-64.5643	-64.5553	7.049	0.325353	2.67727	33.3643	2.04155	2.93291	16.1475	2.96346	402.807	321.617	24.15	0	21.8345	2383.85	56.7456	62.9642	0.973227	27.5896	30.6131
09/04/2018 11:50	2.35337	-64.5355	-64.5411	7.329	0.266084	2.16364	33.3575	2.09716	2.9586	16.2125	2.9912	401.237	320.394	25.09	0	22.6844	2380.12	61.1493	68.0143	0.978364	33.7904	37.584
09/04/2018 12:00	1.25749	-64.5067	-64.527	7.063	0.617297	3.7087	33.3528	2.12775	2.99569	16.2791	3.01999	403.475	322.208	24.16	0	21.8436	2374.76	56.8996	63.1369	0.962913	16.5353	18.3479
09/04/2018 12:10	1.20714	-64.4749	-64.5118	7.052	0.533608	3.1	33.355	2.16222	3.02324	16.3444	3.05657	404.719	323.219	24.16	0	21.8436	2370.78	56.9473	63.1898	0.969	15.9869	17.7394
09/04/2018 12:20	0.472202	-64.4424	-64.4962	7.73	0.617756	2.13913	33.3621	2.13846	3.02905	16.4107	3.05914	403.055	321.876	22.43	0	20.2794	2369.95	49.3358	54.4739	0.978609	5.47155	6.04139
09/04/2018 12:30	1.623	-64.4121	-64.4809	6.586	0.462094	2.45217	33.3654	2.13151	2.99737	16.4744	3.05015	400.669	319.958	25.44	0	23.0008	2374.52	62.8877	70.0077	0.975478	23.8953	26.6006
09/04/2018 12:40	nan	-64.3838	-64.4665	7.444	nan	2.98636	33.3747	2.10897	2.954	16.5357	2.99141	395.128	315.479	24.93	0	22.5397	2380.79	60.3874	67.1402	0.970136	nan	nan
09/04/2018 12:50	nan	-64.3557	-64.4517	7.171	nan	3.88696	33.3691	2.10061	2.92977	16.5923	2.97295	400.621	319.866	25.18	0	22.7658	2384.3	61.5211	68.4431	0.96113	nan	nan
09/04/2018 13:00	nan	-64.3258	-64.4363	7.183	nan	3.92917	33.3554	2.09248	2.89593	16.6522	2.9192	398.16	317.899	25.29	0	22.8652	2389.22	61.9792	68.9713	0.960708	nan	nan
09/04/2018 13:10	nan	-64.2962	-64.4215	7.091	nan	3.64091	33.3497	2.09978	2.89389	16.7075	2.91501	399.607	319.065	25.01	0	22.6121	2389.52	60.6524	67.4483	0.963591	nan	nan
09/04/2018 13:20	nan	-64.2637	-64.4073	7.207	nan	4.12609	33.3547	2.09145	2.87879	16.7667	2.89686	400.832	320.021	24.49	0	22.1419	2391.72	58.2066	64.643	0.958739	nan	nan
09/04/2018 13:30	nan	-64.2279	-64.3928	8.034	nan	3.82273	33.3552	2.08005	2.87114	16.8295	2.89116	403.569	322.201	26.14	0	23.6337	2392.83	66.0331	73.6299	0.961773	nan	nan
09/04/2018 13:40	nan	-64.1925	-64.3781	8.007	nan	3.80909	33.3499	1.97706	2.85699	16.8905	2.88794	394.061	314.62	27.54	0	24.8995	2394.89	73.0418	81.6928	0.961909	nan	nan
09/04/2018 13:50	nan	-64.1568	-64.3618	8.367	nan	4.78696	33.3396	1.95142	2.6917	16.9512	2.74438	394.393	314.823	30.04	0	27.1598	2419.14	86.0593	96.7093	0.95213	nan	nan
09/04/2018 14:00	nan	-64.1232	-64.3454	7.26	nan	6.02609	33.3587	1.94431	2.67404	17.0119	2.68049	390.324	311.498	29.51	0	26.6806	2421.75	83.0826	93.2766	0.939739	nan	nan
09/04/2018 14:10	nan	-64.0926	-64.3307	7.067	nan	7.26364	33.3384	1.92385	2.67817	17.0701	2.70069	393.862	314.377	30.48	0	27.5576	2421.14	88.4953	99.522	0.927364	nan	nan
09/04/2018 14:20	nan	-64.0632	-64.3168	7.671	nan	8.27727	33.3102	1.97304	2.62948	17.1234	2.66063	412.455	329.255	30	0	27.1236	2428.34	85.6735	96.269	0.917227	nan	nan
09/04/2018 14:30	nan	-64.0327	-64.3021	6.468	nan	9.476	33.3433	2.06964	2.68855	17.174	2.67521	426.338	340.271	30.64	0	27.7023	2419.61	89.431	100.601	0.90524	nan	nan
09/04/2018 14:40	nan	-64.0032	-64.2871	6.748	nan	10.5455	33.3702	2.04785	2.82729	17.229	2.81708	416.828	332.708	30.73	0	27.7836	2399.23	90.3248	101.622	0.894545	nan	nan
09/04/2018 14:50	nan	-63.9739	-64.2731	6.999	nan	11.6545	33.3724	2.02348	2.79442	17.2889	2.83762	411.274	328.283	30.28	0	27.3768	2404.04	87.6777	98.5689	0.883455	nan	nan
09/04/2018 15:00	nan	-63.9435	-64.2591	6.377	nan	11.7913	33.3712	2.0149	2.73638	17.3475	2.76639	424.617	338.891	30.9	0	27.9373	2412.56	91.0486	102.465	0.882087	nan	nan
09/04/2018 15:10	2.69716	-63.9167	-64.2457	6.466	0.33235	12.1545	33.3766	1.98592	2.72745	17.404	2.7433	422.367	337.068	31.29	0	28.2899	2413.87	93.2767	105.04	0.878455	53.0409	59.7297
09/04/2018 15:20	1.90746	-63.8894	-64.2324	6.659	-0.999361	12.3435	33.409	1.9862	2.69572	17.4587	2.73331	418.906	334.227	30.8	0	27.8469	2418.55	90.3631	101.677	0.876565	36.2612	40.8013
09/04/2018 15:30	2.52472	-63.8622	-64.2193	5.976	-0.893962	9.24091	33.4208	2.02035	2.68097	17.5134	2.69279	420.113	335.138	31.14	0	28.1543	2420.72	92.2761	103.888	0.907591	50.7463	57.1319
09/04/2018 15:40	1.73132	-63.8339	-64.2054	7.223	-0.361509	6.528	33.4337	2.03835	2.73239	17.5656	2.7316	423.014	337.447	29.97	0	27.0965	2413.15	85.7755	96.3786	0.93472	33.3145	37.4327
09/04/2018 15:50	1.81246	-63.8074	-64.1922	6.112	-2.05032	5.37917	33.4436	2.04828	2.73435	17.6186	2.75546	410.117	327.151	29.66	0	26.8162	2412.86	84.0613	94.4007	0.946208	34.599	38.8546
09/04/2018 16:00	2.24907	-63.7781	-64.1792	5.499	-2.19801	3.88182	33.4397	2.05237	2.73686	17.6686	2.75285	410.767	327.677	27.31	0	24.6915	2412.49	71.5988	80.0405	0.961182	37.1472	41.527
09/04/2018 16:10	2.34448	-63.7499	-64.1661	6.231	-1.78495	4.11364	33.4338	2.08591	2.72875	17.7174	2.7467	414.613	330.754	26.92	0	24.3389	2413.68	69.6089	77.7515	0.958864	37.5561	41.9493
09/04/2018 16:20	1.38264	-63.7223	-64.1528	7.184	-1.35721	3.88696	33.4361	2.10075	2.76341	17.7675	2.77007	421.372	336.156	27.61	0	24.9628	2408.59	73.1941	81.8749	0.96113	23.3442	26.1128
09/04/2018 16:30	3.15327	-63.6951	-64.1401	6.214	-1.22817	3.29091	33.4312	2.13007	2.78309	17.8123	2.79407	416.827	332.555	31.07	0	28.091	2405.7	92.1587	103.743	0.967091	67.449	75.9277
09/04/2018 16:40	2.47044	-63.6656	-64.1281	6.694	-0.849652	2.75652	33.4276	2.13378	2.81337	17.855	2.82521	417.444	333.075	30.93	0	27.9645	2401.26	91.4353	102.906	0.972435	52.7181	59.3314
09/04/2018 16:50	2.04822	-63.6355	-64.1173	5.876	-0.88047	3.34091	33.4238	2.13951	2.81822	17.9011	2.83396	414.497	330.737	32.38	0	29.2754	2400.56	99.9955	112.797	0.966591	47.5127	53.5952
09/04/2018 17:00	1.72987	-63.6033	-64.1082	6.791	0.359159	3.184	33.4223	2.13697	2.81413	17.9363	2.83676	426.819	340.575	31.23	0	28.2357	2401.15	93.1741	104.914	0.96816	37.4513	42.1701
09/04/2018 17:10	2.07056	-63.5691	-64.0981	6.545	0.541164	2.9	33.4079	2.10953	2.80796	17.9656	2.83024	430.112	343.231	31.4	0	28.3894	2402.06	94.1479	106.039	0.971	45.4285	51.1663
09/04/2018 17:20	2.49032	-63.5342	-64.0876	6.912	0.181563	2.0375	33.3781	2.09091	2.78985	17.9904	2.81552	416.724	332.606	31.71	0	28.6697	2404.71	95.916	108.084	0.979625	56.1587	63.2829
09/04/2018 17:30	2.94832	-63.4991	-64.0773	6.588	0.362033	1.13636	33.3646	2.08121	2.75439	18.0141	2.78299	419.441	334.785	29.98	0	27.1056	2409.91	85.8888	96.5076	0.988636	60.0841	67.5126
09/04/2018 17:40	4.07249	-63.4666	-64.0677	5.97	-0.293317	0.53913	33.3608	2.0625	2.7375	18.0374	2.76516	416.261	332.244	30.43	0	27.5124	2412.39	88.3724	99.3753	0.994609	85.9093	96.6055
09/04/2018 17:50	1.03221	-63.4332	-64.0582	6.053	2.07455	0.496	33.3675	2.05872	2.73235	18.0574	2.7568	447.212	356.926	30.15	0	27.2593	2413.15	86.7816	97.5397	0.99504	21.3918	24.0436
09/04/2018 18:00	1.83217	-63.3998	-64.0482	6.126	0.259724	0	33.3814	2.07916	2.73847	18.077	2.75484	418.891	334.29	29.97	0	27.0965	2412.25	85.7914	96.3965	1	37.7243	42.3876
09/04/2018 18:10	2.33992	-63.3697	-64.0383	5.287	0.116559	0	33.3846	2.07768	2.76569	18.0958	2.78401	425.862	339.865	28.44	0	25.7132	2408.25	77.5378	86.8775	1	43.5437	48.7886
09/04/2018 18:20	1.49221	-63.3404	-64.0281	6.845	-0.0326014	0	33.3859	2.05783	2.76064	18.1146	2.78869	425.46	339.543	30.43	0	27.5124	2408.99	88.4348	99.4455	1	31.6713	35.6145
09/04/2018 18:30	2.114	-63.3078	-64.0176	6.328	-0.843241	0	33.3844	2.03472	2.74107	18.1284	2.76862	412.71	329.359	32.71	0	29.5738	2411.87	101.754	114.837	1	51.6261	58.2638
09/04/2018 18:40	1.90804	-63.2754	-64.0081	6.094	-0.33006	0	33.3803	2.03431	2.71481	18.1411	2.73942	417.523	333.191	32.51	0	29.393	2415.73	100.463	113.347	1	46.0051	51.9047
09/04/2018 18:50	0.667216	-63.2425	-63.9986	5.817	-0.474037	0	33.4077	2.04171	2.71338	18.1545	2.73562	418.477	333.889	29.99	0	27.1146	2415.94	85.8372	96.4514	1	13.7453	15.4449
09/04/2018 19:00	3.46878	-63.2098	-63.9888	6.655	-1.66096	0	33.4288	2.05356	2.73028	18.1726	2.75299	414.145	330.396	30.63	0	27.6932	2413.46	89.488	100.664	1	74.4993	83.8032
09/04/2018 19:10	1.0129	-63.1788	-63.9787	6.769	-0.780179	0	33.4303	2.07953	2.74206	18.1935	2.76338	416.922	332.615	28.63	0	25.885	2411.72	78.492	87.9788	1	19.0811	21.3873
09/04/2018 19:20	3.98139	-63.1484	-63.9683	6.53	-0.425677	0	33.4313	2.10882	2.76667	18.2178	2.78791	419.028	334.307	29.82	0	26.9609	2408.11	85.0302	95.516	1	81.2493	91.2688
09/04/2018 19:30	2.55965	-63.1127	-63.9577	6.008	-0.994665	0	33.4228	2.134	2.81155	18.2428	2.82851	415.853	331.818	28.89	0	26.1201	2401.53	80.054	89.7739	1	49.1785	55.1495
09/04/2018 19:40	1.26664	-63.079	-63.9475	6.502	-0.483666	0	33.4155	2.13358	2.81659	18.2675	2.85263	412.934	329.521	30.22	0	27.3225	2400.79	87.3986	98.245	1	26.5686	29.8658
09/04/2018 19:50	3.48408	-63.0419	-63.9362	7.65	0.616645	0	33.4176	2.1472	2.72261	18.2927	2.75203	428.355	341.757	29.4	0	26.5812	2414.58	82.6031	92.7198	1	69.0711	77.5304
09/04/2018 20:00	2.42399	-63.0065	-63.925	5.911	0.0165194	0	33.4186	2.15691	2.83169	18.3168	2.84973	411.674	328.506	29.92	0	27.0513	2398.59	85.7561	96.3484	1	49.8893	56.0514
09/04/2018 20:10	4.43593	-62.9722	-63.9148	6.993	0.170621	0	33.4187	2.20082	2.86248	18.3425	2.89007	413.179	329.732	29.27	0	26.4636	2394.09	82.2434	92.2941	1	87.5583	98.2585
09/04/2018 20:20	3.97979	-62.9382	-63.9046	7.141	0.441502	0	33.402	2.26692	2.9049	18.3662	2.91603	424.015	338.434	28.43	0	25.7042	2387.92	77.814	87.1853	1	74.324	83.2749
09/04/2018 20:30	2.71008	-62.9011	-63.8936	7.254	2.29893	0	33.3747	2.32424	2.98705	18.3924	2.99531	443.511	354.112	27.61	0	24.9628	2376.01	73.6942	82.4343	1	47.9322	53.6169
09/04/2018 20:40	3.42018	-62.8628	-63.8818	7.651	1.43812	0	33.3623	2.36122	3.05291	18.4187	3.07263	426.352	340.489	26.85	0	24.2757	2366.51	69.9447	78.1148	1	57.4136	64.12
09/04/2018 20:50	1.65727	-62.8266	-63.8702	5.77	0.236738	0	33.3746	2.389	3.0772	18.4497	3.10783	409.739	327.216	30.64	0	27.7023	2363.02	90.4955	101.799	1	35.9941	40.49
09/04/2018 21:00	3.10162	-62.7933	-63.8601	7.124	1.17669	0	33.3853	2.41824	3.08983	18.4752	3.11372	425.646	339.898	29.95	0	27.0784	2361.2	86.6011	97.3029	1	64.465	72.4313
[truncated: 3,626 more rows]
