# Supplementary material
Source: MDPI journal article supplement (https://www.mdpi.com/2073-4433/12/1/122)
Supplement: s1 [file s1 › atmosphere-1026766-SI/sup/Supplementary Material_figure_S1.pdf]

**Supplementary Material**

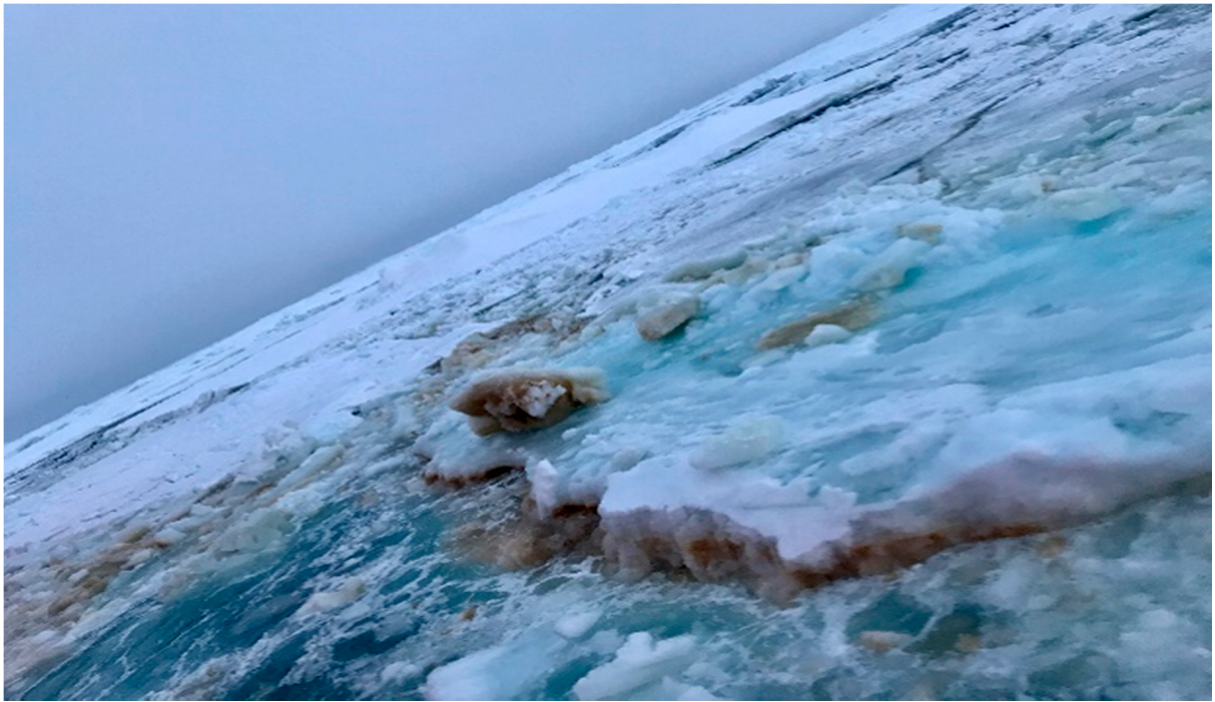

**Figure S1.** Massive sea ice algae colonies encountered in the Antarctic Peninsula sea ice zone.
